# Supplementary material for: Comparative Genome Analysis of Hungarian and Global Strains of Salmonella Infantis
Source: Front Microbiol. 2020 Apr 3;11:539. doi: 10.3389/fmicb.2020.00539 (PMC7147451; doi:10.3389/fmicb.2020.00539)
Supplement: Supplementary file 3 [file Table_2.XLSX]

## Sheet: gene_presence_absence
Supplementary Table S2 Presence/absence of genes in strains investigated
Gene	Non-unique Gene name	Annotation	No. isolates	No. sequences	Avg sequences per isolate	Genome Fragment	Order within Fragment	Accessory Fragment	Accessory Order with Fragment	QC	Min group size nuc	Max group size nuc	Avg group size nuc	Brasil-2013_LPM-ST01	Brasil-2013_LPM-ST02	Brasil-2015_SI05	Hungary-1980_SI15023h	Hungary-1983_SI220h	Hungary-1994_SI69_94	Hungary-2004_SI54_04	Hungary-2012_SI3337_12	Hungary-2013_SI757_13	Hungary-2013_SI786_13	Hungary-2016_SI1070_16	Hungary-2016_SI240_16	Israel-1971_335.3	Israel-2008_119944	Israel-2008_120100	Israel-2008_CFSAN014765	Israel-2008_UZH-SAL-70-15	Israel-2014_FDA00004302	Italy-2006_BromIEs6	Italy-2007_BroMESC07	Italy-2009_BroMESC09	Italy-2012_BrchM112	Italy-2013_13002124	Italy-2013_BrochM113	Italy-2013_huM12013	Italy-2014_14035093	Italy-2014_14057027	Italy-2014_italy2014	Japan-1995_142	Japan-1995_146	Japan-1996_407	Japan-1996_425	Japan-1999_896	Japan-1999_911	Japan-1999_917	Japan-1999_986
hutU		Urocanate hydratase	102	102	1	1	5161				407	1685	1649	DGJMBLJC_02433	HFDHOMNF_02223	ALEPGING_02475	GEOGNNEI_02269	BINKDPLB_02444	IPPPMGOG_02168	NCHKEDON_02000	PLMPIJHD_02860	LIBHOFBA_02672	MFAGDJPO_02290	AICMNGMC_01784	JAGDPAPJ_02431	JICHJFDH_01792	AHEHGMLM_04384	PABJNMJP_03106	MAPHOHON_04425	ONDKMJBG_02359	JDGDJJKN_00677	KLMHLHPE_04302	EGICBAEE_04323	LNEFCFII_04370	NILJAHBC_04389	KCIFOFJF_04314	CJCKLIFP_04395	IABBECJM_04438	LANDOHOG_04385	LOGCBOHO_04449	DKGFALGN_04369	PNFFMGCL_03965	BJCGHIIB_04138	NHHDDJBG_03937	LBLHELLM_03774	CGJPMKCI_03959	JOHJONHN_04246	CNEDDIJH_04125	JLJGJGIB_03823
ygeA		Putative racemase YgeA	102	102	1	1	1839				266	707	690	DGJMBLJC_03351	HFDHOMNF_03868	ALEPGING_01853	GEOGNNEI_01487	BINKDPLB_00248	IPPPMGOG_03314	NCHKEDON_01763	PLMPIJHD_01281	LIBHOFBA_01091	MFAGDJPO_03259	AICMNGMC_01282	JAGDPAPJ_01425	JICHJFDH_01921	AHEHGMLM_03943	PABJNMJP_00204	MAPHOHON_02075	ONDKMJBG_00782	JDGDJJKN_01395	KLMHLHPE_01119	EGICBAEE_00776	LNEFCFII_01466	NILJAHBC_02110	KCIFOFJF_01761	CJCKLIFP_02253	IABBECJM_01467	LANDOHOG_01354	LOGCBOHO_01354	DKGFALGN_01378	PNFFMGCL_01436	BJCGHIIB_00913	NHHDDJBG_00248	LBLHELLM_00249	CGJPMKCI_01075	JOHJONHN_00829	CNEDDIJH_00803	JLJGJGIB_00753
pdxY		Pyridoxal kinase PdxY	102	102	1	1	6762				293	860	836	DGJMBLJC_04616	HFDHOMNF_00437	ALEPGING_04171	GEOGNNEI_00778	BINKDPLB_02009	IPPPMGOG_01789	NCHKEDON_00361	PLMPIJHD_00635	LIBHOFBA_00447	MFAGDJPO_00637	AICMNGMC_00638	JAGDPAPJ_00781	JICHJFDH_04375	AHEHGMLM_03061	PABJNMJP_01296	MAPHOHON_00780	ONDKMJBG_01187	JDGDJJKN_00127	KLMHLHPE_00520	EGICBAEE_00382	LNEFCFII_00396	NILJAHBC_00397	KCIFOFJF_00781	CJCKLIFP_00397	IABBECJM_00781	LANDOHOG_00780	LOGCBOHO_00780	DKGFALGN_00396	PNFFMGCL_00778	BJCGHIIB_00255	NHHDDJBG_00498	LBLHELLM_00847	CGJPMKCI_00395	JOHJONHN_00556	CNEDDIJH_00248	JLJGJGIB_02070
nrdG		Anaerobic ribonucleoside-triphosphate reductase-activating protein	102	102	1	1	16245				164	497	461	DGJMBLJC_00210	HFDHOMNF_02277	ALEPGING_00323	GEOGNNEI_03008	BINKDPLB_01131	IPPPMGOG_04453	NCHKEDON_03446	PLMPIJHD_03251	LIBHOFBA_03026	MFAGDJPO_02351	AICMNGMC_03272	JAGDPAPJ_03269	JICHJFDH_02433	AHEHGMLM_02040	PABJNMJP_04184	MAPHOHON_01442	ONDKMJBG_00105	JDGDJJKN_02595	KLMHLHPE_01438	EGICBAEE_01866	LNEFCFII_02469	NILJAHBC_01442	KCIFOFJF_01206	CJCKLIFP_01977	IABBECJM_02095	LANDOHOG_02094	LOGCBOHO_01672	DKGFALGN_01654	PNFFMGCL_02257	BJCGHIIB_02213	NHHDDJBG_01057	LBLHELLM_01310	CGJPMKCI_02202	JOHJONHN_02399	CNEDDIJH_01811	JLJGJGIB_01659
qorB		Quinone oxidoreductase 2	102	102	1	1	16169				341	848	832	DGJMBLJC_00266	HFDHOMNF_02141	ALEPGING_00354	GEOGNNEI_03415	BINKDPLB_04322	IPPPMGOG_02868	NCHKEDON_04403	PLMPIJHD_03689	LIBHOFBA_03779	MFAGDJPO_03499	AICMNGMC_03689	JAGDPAPJ_03690	JICHJFDH_02763	AHEHGMLM_01746	PABJNMJP_00665	MAPHOHON_01392	ONDKMJBG_02113	JDGDJJKN_02644	KLMHLHPE_03568	EGICBAEE_02627	LNEFCFII_02518	NILJAHBC_01392	KCIFOFJF_02814	CJCKLIFP_02763	IABBECJM_03001	LANDOHOG_02999	LOGCBOHO_02491	DKGFALGN_03085	PNFFMGCL_03402	BJCGHIIB_03995	NHHDDJBG_03867	LBLHELLM_03657	CGJPMKCI_03816	JOHJONHN_04112	CNEDDIJH_03935	JLJGJGIB_03651
group_1260		hypothetical protein	102	102	1	1	15787				1082	1310	1305	DGJMBLJC_00556	HFDHOMNF_04212	ALEPGING_01792	GEOGNNEI_03571	BINKDPLB_01482	IPPPMGOG_03900	NCHKEDON_04246	PLMPIJHD_03846	LIBHOFBA_03936	MFAGDJPO_03656	AICMNGMC_03845	JAGDPAPJ_03847	JICHJFDH_04129	AHEHGMLM_01903	PABJNMJP_00509	MAPHOHON_01236	ONDKMJBG_02269	JDGDJJKN_03815	KLMHLHPE_03870	EGICBAEE_02783	LNEFCFII_02674	NILJAHBC_01235	KCIFOFJF_02658	CJCKLIFP_02920	IABBECJM_02844	LANDOHOG_02842	LOGCBOHO_02647	DKGFALGN_04042	PNFFMGCL_03687	BJCGHIIB_03548	NHHDDJBG_02521	LBLHELLM_02629	CGJPMKCI_02509	JOHJONHN_03276	CNEDDIJH_01947	JLJGJGIB_01965
macB		Macrolide export ATP-binding/permease protein MacB	102	102	1	1	5372				428	2012	1930	DGJMBLJC_01187	HFDHOMNF_01333	ALEPGING_03087	GEOGNNEI_04440	BINKDPLB_01583	IPPPMGOG_03404	NCHKEDON_01590	PLMPIJHD_04551	LIBHOFBA_04634	MFAGDJPO_04570	AICMNGMC_04359	JAGDPAPJ_04544	JICHJFDH_00858	AHEHGMLM_02243	PABJNMJP_01826	MAPHOHON_03433	ONDKMJBG_04246	JDGDJJKN_00573	KLMHLHPE_03324	EGICBAEE_03477	LNEFCFII_03334	NILJAHBC_03654	KCIFOFJF_03439	CJCKLIFP_03763	IABBECJM_03806	LANDOHOG_03621	LOGCBOHO_03661	DKGFALGN_03345	PNFFMGCL_04151	BJCGHIIB_03710	NHHDDJBG_03401	LBLHELLM_04067	CGJPMKCI_03714	JOHJONHN_03643	CNEDDIJH_03165	JLJGJGIB_02633
hypE		Carbamoyl dehydratase HypE	102	102	1	1	2130				539	1010	1002	DGJMBLJC_01317	HFDHOMNF_03462	ALEPGING_00972	GEOGNNEI_01329	BINKDPLB_00090	IPPPMGOG_01067	NCHKEDON_01367	PLMPIJHD_01123	LIBHOFBA_00933	MFAGDJPO_03101	AICMNGMC_01124	JAGDPAPJ_01267	JICHJFDH_00133	AHEHGMLM_02634	PABJNMJP_00361	MAPHOHON_02232	ONDKMJBG_00624	JDGDJJKN_01561	KLMHLHPE_01277	EGICBAEE_00933	LNEFCFII_01307	NILJAHBC_01952	KCIFOFJF_01919	CJCKLIFP_02095	IABBECJM_01310	LANDOHOG_01511	LOGCBOHO_01511	DKGFALGN_01536	PNFFMGCL_01593	BJCGHIIB_01071	NHHDDJBG_00090	LBLHELLM_00091	CGJPMKCI_01233	JOHJONHN_00987	CNEDDIJH_00645	JLJGJGIB_00595
ftsY		Signal recognition particle receptor FtsY	102	102	1	1	14387				521	1544	1463	DGJMBLJC_01925	HFDHOMNF_01920	ALEPGING_01493	GEOGNNEI_03946	BINKDPLB_03683	IPPPMGOG_04536	NCHKEDON_03365	PLMPIJHD_01743	LIBHOFBA_01552	MFAGDJPO_01724	AICMNGMC_01602	JAGDPAPJ_01745	JICHJFDH_03318	AHEHGMLM_03416	PABJNMJP_04709	MAPHOHON_03004	ONDKMJBG_03608	JDGDJJKN_03408	KLMHLHPE_02609	EGICBAEE_03574	LNEFCFII_03571	NILJAHBC_03268	KCIFOFJF_03504	CJCKLIFP_03287	IABBECJM_03330	LANDOHOG_03328	LOGCBOHO_03014	DKGFALGN_03513	PNFFMGCL_02683	BJCGHIIB_02487	NHHDDJBG_02297	LBLHELLM_02467	CGJPMKCI_02285	JOHJONHN_03100	CNEDDIJH_02966	JLJGJGIB_01804
argT		Lysine/arginine/ornithine-binding periplasmic protein	102	102	1	1	10056				260	881	776	DGJMBLJC_02280	HFDHOMNF_04597	ALEPGING_02254	GEOGNNEI_02541	BINKDPLB_00908	IPPPMGOG_00702	NCHKEDON_00717	PLMPIJHD_02517	LIBHOFBA_02328	MFAGDJPO_01137	AICMNGMC_02637	JAGDPAPJ_02572	JICHJFDH_03182	AHEHGMLM_01233	PABJNMJP_03820	MAPHOHON_02594	ONDKMJBG_02950	JDGDJJKN_02840	KLMHLHPE_02994	EGICBAEE_01169	LNEFCFII_01772	NILJAHBC_02607	KCIFOFJF_02497	CJCKLIFP_01280	IABBECJM_01964	LANDOHOG_01746	LOGCBOHO_02369	DKGFALGN_03192	PNFFMGCL_01931	BJCGHIIB_03138	NHHDDJBG_02823	LBLHELLM_02932	CGJPMKCI_03113	JOHJONHN_01946	CNEDDIJH_02474	JLJGJGIB_03174
aroA		3-phosphoshikimate 1-carboxyvinyltransferase	102	102	1	1	5451				662	1283	1268	DGJMBLJC_02828	HFDHOMNF_01295	ALEPGING_03075	GEOGNNEI_04472	BINKDPLB_03007	IPPPMGOG_00821	NCHKEDON_03057	PLMPIJHD_04583	LIBHOFBA_04666	MFAGDJPO_04602	AICMNGMC_04391	JAGDPAPJ_04576	JICHJFDH_00891	AHEHGMLM_02276	PABJNMJP_01860	MAPHOHON_03400	ONDKMJBG_04213	JDGDJJKN_00542	KLMHLHPE_03292	EGICBAEE_03445	LNEFCFII_03302	NILJAHBC_03686	KCIFOFJF_03471	CJCKLIFP_03795	IABBECJM_03838	LANDOHOG_03589	LOGCBOHO_03693	DKGFALGN_03377	PNFFMGCL_04223	BJCGHIIB_03742	NHHDDJBG_04230	LBLHELLM_04098	CGJPMKCI_03682	JOHJONHN_04463	CNEDDIJH_04449	JLJGJGIB_02665
putA		Bifunctional protein PutA	102	102	1	1	5781				1409	3980	3897	DGJMBLJC_02990	HFDHOMNF_00081	ALEPGING_02528	GEOGNNEI_01103	BINKDPLB_04195	IPPPMGOG_04298	NCHKEDON_02854	PLMPIJHD_00960	LIBHOFBA_00772	MFAGDJPO_00962	AICMNGMC_00963	JAGDPAPJ_01106	JICHJFDH_02794	AHEHGMLM_01655	PABJNMJP_01622	MAPHOHON_01106	ONDKMJBG_00861	JDGDJJKN_00449	KLMHLHPE_00845	EGICBAEE_02976	LNEFCFII_00071	NILJAHBC_00071	KCIFOFJF_01107	CJCKLIFP_00071	IABBECJM_01107	LANDOHOG_01106	LOGCBOHO_01106	DKGFALGN_00071	PNFFMGCL_01163	BJCGHIIB_00640	NHHDDJBG_03069	LBLHELLM_00522	CGJPMKCI_00070	JOHJONHN_01147	CNEDDIJH_02610	JLJGJGIB_02762
ycgL		Protein YcgL	102	102	1	1	7556				200	293	290	DGJMBLJC_03197	HFDHOMNF_00830	ALEPGING_00211	GEOGNNEI_00408	BINKDPLB_03155	IPPPMGOG_02356	NCHKEDON_03898	PLMPIJHD_00266	LIBHOFBA_00075	MFAGDJPO_00266	AICMNGMC_00266	JAGDPAPJ_00409	JICHJFDH_00400	AHEHGMLM_00722	PABJNMJP_00925	MAPHOHON_00409	ONDKMJBG_01558	JDGDJJKN_01977	KLMHLHPE_00150	EGICBAEE_00011	LNEFCFII_00767	NILJAHBC_00769	KCIFOFJF_00409	CJCKLIFP_00769	IABBECJM_00409	LANDOHOG_00408	LOGCBOHO_00408	DKGFALGN_00767	PNFFMGCL_00408	BJCGHIIB_01246	NHHDDJBG_01952	LBLHELLM_02044	CGJPMKCI_00778	JOHJONHN_00184	CNEDDIJH_01070	JLJGJGIB_00323
yqcC		putative protein YqcC	102	102	1	1	1904				329	329	329	DGJMBLJC_03299	HFDHOMNF_03924	ALEPGING_02753	GEOGNNEI_01437	BINKDPLB_00198	IPPPMGOG_03364	NCHKEDON_01713	PLMPIJHD_01231	LIBHOFBA_01041	MFAGDJPO_03209	AICMNGMC_01232	JAGDPAPJ_01375	JICHJFDH_03248	AHEHGMLM_03993	PABJNMJP_00253	MAPHOHON_02124	ONDKMJBG_00732	JDGDJJKN_01444	KLMHLHPE_01169	EGICBAEE_00825	LNEFCFII_01416	NILJAHBC_02060	KCIFOFJF_01811	CJCKLIFP_02203	IABBECJM_01418	LANDOHOG_01403	LOGCBOHO_01403	DKGFALGN_01428	PNFFMGCL_01485	BJCGHIIB_00963	NHHDDJBG_00198	LBLHELLM_00199	CGJPMKCI_01125	JOHJONHN_00879	CNEDDIJH_00753	JLJGJGIB_00703
group_1518		hypothetical protein	102	102	1	1	6029				116	239	237	DGJMBLJC_03890	HFDHOMNF_00209	ALEPGING_04056	GEOGNNEI_00985	BINKDPLB_03465	IPPPMGOG_01996	NCHKEDON_00154	PLMPIJHD_00842	LIBHOFBA_00654	MFAGDJPO_00844	AICMNGMC_00845	JAGDPAPJ_00988	JICHJFDH_01320	AHEHGMLM_01536	PABJNMJP_01503	MAPHOHON_00987	ONDKMJBG_00980	JDGDJJKN_00330	KLMHLHPE_00727	EGICBAEE_02858	LNEFCFII_00189	NILJAHBC_00190	KCIFOFJF_00988	CJCKLIFP_00190	IABBECJM_00988	LANDOHOG_00987	LOGCBOHO_00987	DKGFALGN_00189	PNFFMGCL_01045	BJCGHIIB_00522	NHHDDJBG_00705	LBLHELLM_00640	CGJPMKCI_00188	JOHJONHN_01265	CNEDDIJH_00041	JLJGJGIB_03014
ymiA		putative protein YmiA	102	102	1	1	7377				128	128	128	DGJMBLJC_04060	HFDHOMNF_00723	ALEPGING_02829	GEOGNNEI_00509	BINKDPLB_01004	IPPPMGOG_02185	NCHKEDON_03796	PLMPIJHD_00368	LIBHOFBA_00177	MFAGDJPO_00368	AICMNGMC_00368	JAGDPAPJ_00511	JICHJFDH_00500	AHEHGMLM_00620	PABJNMJP_01027	MAPHOHON_00511	ONDKMJBG_01456	JDGDJJKN_02078	KLMHLHPE_00251	EGICBAEE_00113	LNEFCFII_00665	NILJAHBC_00666	KCIFOFJF_00512	CJCKLIFP_00666	IABBECJM_00512	LANDOHOG_00511	LOGCBOHO_00511	DKGFALGN_00665	PNFFMGCL_00509	BJCGHIIB_03897	NHHDDJBG_01851	LBLHELLM_02145	CGJPMKCI_00677	JOHJONHN_00286	CNEDDIJH_00517	JLJGJGIB_00222
kefF		Glutathione-regulated potassium-efflux system ancillary protein KefF	102	102	1	1	10994				299	530	523	DGJMBLJC_04657	HFDHOMNF_02507	ALEPGING_01766	GEOGNNEI_03218	BINKDPLB_00494	IPPPMGOG_00094	NCHKEDON_01207	PLMPIJHD_03461	LIBHOFBA_03236	MFAGDJPO_02561	AICMNGMC_03482	JAGDPAPJ_03479	JICHJFDH_01512	AHEHGMLM_00164	PABJNMJP_04446	MAPHOHON_01704	ONDKMJBG_00367	JDGDJJKN_02360	KLMHLHPE_01648	EGICBAEE_01656	LNEFCFII_02259	NILJAHBC_01652	KCIFOFJF_01416	CJCKLIFP_01767	IABBECJM_02305	LANDOHOG_02304	LOGCBOHO_01882	DKGFALGN_01864	PNFFMGCL_02061	BJCGHIIB_01682	NHHDDJBG_01418	LBLHELLM_01368	CGJPMKCI_01672	JOHJONHN_01783	CNEDDIJH_01281	JLJGJGIB_01140
phoR		Phosphate regulon sensor protein PhoR	102	102	1	1	503				920	1295	1286	DGJMBLJC_04927	HFDHOMNF_04353	ALEPGING_03176	GEOGNNEI_04343	BINKDPLB_02886	IPPPMGOG_00419	NCHKEDON_03137	PLMPIJHD_04454	LIBHOFBA_04537	MFAGDJPO_04329	AICMNGMC_04262	JAGDPAPJ_04447	JICHJFDH_02617	AHEHGMLM_03153	PABJNMJP_02191	MAPHOHON_03073	ONDKMJBG_02497	JDGDJJKN_03662	KLMHLHPE_03258	EGICBAEE_02451	LNEFCFII_03268	NILJAHBC_02866	KCIFOFJF_02164	CJCKLIFP_02586	IABBECJM_02628	LANDOHOG_02628	LOGCBOHO_03271	DKGFALGN_02187	PNFFMGCL_02814	BJCGHIIB_02805	NHHDDJBG_02595	LBLHELLM_02816	CGJPMKCI_03058	JOHJONHN_02634	CNEDDIJH_02160	JLJGJGIB_02230
group_1575		hypothetical protein	102	102	1	1	578				629	1958	1919	DGJMBLJC_04979	HFDHOMNF_04397	ALEPGING_02379	GEOGNNEI_04302	BINKDPLB_02607	IPPPMGOG_00378	NCHKEDON_03178	PLMPIJHD_04413	LIBHOFBA_04496	MFAGDJPO_04288	AICMNGMC_04221	JAGDPAPJ_04406	JICHJFDH_02576	AHEHGMLM_03194	PABJNMJP_02150	MAPHOHON_03114	ONDKMJBG_02538	JDGDJJKN_03621	KLMHLHPE_03217	EGICBAEE_02492	LNEFCFII_03227	NILJAHBC_02907	KCIFOFJF_02205	CJCKLIFP_02545	IABBECJM_02587	LANDOHOG_02669	LOGCBOHO_03312	DKGFALGN_02146	PNFFMGCL_02855	BJCGHIIB_02846	NHHDDJBG_02636	LBLHELLM_02775	CGJPMKCI_03017	JOHJONHN_02675	CNEDDIJH_02119	JLJGJGIB_02271
yjfC		Putative acid--amine ligase YjfC	102	102	1	1	16135				164	1181	1121	DGJMBLJC_00291	HFDHOMNF_02167	ALEPGING_00378	GEOGNNEI_03439	BINKDPLB_04346	IPPPMGOG_02892	NCHKEDON_04379	PLMPIJHD_03713	LIBHOFBA_03803	MFAGDJPO_03523	AICMNGMC_03713	JAGDPAPJ_03714	JICHJFDH_02739	AHEHGMLM_01770	PABJNMJP_00641	MAPHOHON_01368	ONDKMJBG_02137	JDGDJJKN_02668	KLMHLHPE_03592	EGICBAEE_02651	LNEFCFII_02542	NILJAHBC_01368	KCIFOFJF_02790	CJCKLIFP_02787	IABBECJM_02977	LANDOHOG_02975	LOGCBOHO_02515	DKGFALGN_03061	PNFFMGCL_03426	BJCGHIIB_04019	NHHDDJBG_03891	LBLHELLM_03633	CGJPMKCI_03840	JOHJONHN_04136	CNEDDIJH_03959	JLJGJGIB_03627
nnr		Bifunctional NAD(P)H-hydrate repair enzyme Nnr	102	102	1	1	16102				734	1544	1533	DGJMBLJC_00311	HFDHOMNF_02189	ALEPGING_01982	GEOGNNEI_03460	BINKDPLB_04367	IPPPMGOG_02913	NCHKEDON_04358	PLMPIJHD_03734	LIBHOFBA_03824	MFAGDJPO_03544	AICMNGMC_03734	JAGDPAPJ_03735	JICHJFDH_02718	AHEHGMLM_01791	PABJNMJP_00620	MAPHOHON_01347	ONDKMJBG_02158	JDGDJJKN_02688	KLMHLHPE_03613	EGICBAEE_02672	LNEFCFII_02563	NILJAHBC_01347	KCIFOFJF_02769	CJCKLIFP_02808	IABBECJM_02956	LANDOHOG_02954	LOGCBOHO_02536	DKGFALGN_03040	PNFFMGCL_03447	BJCGHIIB_04040	NHHDDJBG_03912	LBLHELLM_03612	CGJPMKCI_03861	JOHJONHN_04157	CNEDDIJH_03980	JLJGJGIB_03606
eptA		Phosphoethanolamine transferase EptA	102	102	1	1	15970				1079	1643	1634	DGJMBLJC_00478	HFDHOMNF_04279	ALEPGING_01432	GEOGNNEI_03519	BINKDPLB_04427	IPPPMGOG_02972	NCHKEDON_04298	PLMPIJHD_03794	LIBHOFBA_03884	MFAGDJPO_03604	AICMNGMC_03793	JAGDPAPJ_03795	JICHJFDH_04072	AHEHGMLM_01851	PABJNMJP_00561	MAPHOHON_01288	ONDKMJBG_02217	JDGDJJKN_03866	KLMHLHPE_03672	EGICBAEE_02731	LNEFCFII_02622	NILJAHBC_01287	KCIFOFJF_02710	CJCKLIFP_02868	IABBECJM_02896	LANDOHOG_02894	LOGCBOHO_02595	DKGFALGN_02981	PNFFMGCL_03508	BJCGHIIB_03782	NHHDDJBG_02469	LBLHELLM_02576	CGJPMKCI_02457	JOHJONHN_04160	CNEDDIJH_01895	JLJGJGIB_01912
dinF		DNA damage-inducible protein F	102	102	1	1	15783				1151	1364	1322	DGJMBLJC_00560	HFDHOMNF_04208	ALEPGING_01788	GEOGNNEI_03575	BINKDPLB_01478	IPPPMGOG_03904	NCHKEDON_04243	PLMPIJHD_03849	LIBHOFBA_03939	MFAGDJPO_03659	AICMNGMC_03849	JAGDPAPJ_03850	JICHJFDH_04133	AHEHGMLM_01906	PABJNMJP_00506	MAPHOHON_01232	ONDKMJBG_02272	JDGDJJKN_03811	KLMHLHPE_03866	EGICBAEE_02786	LNEFCFII_02677	NILJAHBC_01232	KCIFOFJF_02654	CJCKLIFP_02923	IABBECJM_02840	LANDOHOG_02839	LOGCBOHO_02650	DKGFALGN_04046	PNFFMGCL_03683	BJCGHIIB_03552	NHHDDJBG_02525	LBLHELLM_02633	CGJPMKCI_02513	JOHJONHN_03272	CNEDDIJH_01950	JLJGJGIB_01968
rhaT		L-rhamnose-proton symporter	102	102	1	1	15446				347	1034	1023	DGJMBLJC_00858	HFDHOMNF_01797	ALEPGING_01152	GEOGNNEI_01993	BINKDPLB_01651	IPPPMGOG_03652	NCHKEDON_02067	PLMPIJHD_02017	LIBHOFBA_01825	MFAGDJPO_01884	AICMNGMC_01858	JAGDPAPJ_02017	JICHJFDH_03974	AHEHGMLM_02536	PABJNMJP_03033	MAPHOHON_03942	ONDKMJBG_02423	JDGDJJKN_03964	KLMHLHPE_03751	EGICBAEE_03971	LNEFCFII_04083	NILJAHBC_04100	KCIFOFJF_03999	CJCKLIFP_04109	IABBECJM_04152	LANDOHOG_04099	LOGCBOHO_04147	DKGFALGN_03687	PNFFMGCL_03043	BJCGHIIB_02992	NHHDDJBG_03199	LBLHELLM_03178	CGJPMKCI_03418	JOHJONHN_02989	CNEDDIJH_03457	JLJGJGIB_03291
dtd		D-aminoacyl-tRNA deacylase	102	102	1	1	15403				353	437	435	DGJMBLJC_00887	HFDHOMNF_01823	ALEPGING_02932	GEOGNNEI_01968	BINKDPLB_01626	IPPPMGOG_03677	NCHKEDON_02092	PLMPIJHD_02042	LIBHOFBA_01850	MFAGDJPO_01909	AICMNGMC_01883	JAGDPAPJ_02042	JICHJFDH_03999	AHEHGMLM_02561	PABJNMJP_03008	MAPHOHON_03917	ONDKMJBG_02448	JDGDJJKN_03989	KLMHLHPE_03726	EGICBAEE_03946	LNEFCFII_04058	NILJAHBC_04075	KCIFOFJF_04024	CJCKLIFP_04084	IABBECJM_04127	LANDOHOG_04074	LOGCBOHO_04122	DKGFALGN_03662	PNFFMGCL_03068	BJCGHIIB_02967	NHHDDJBG_03174	LBLHELLM_03203	CGJPMKCI_03443	JOHJONHN_02964	CNEDDIJH_03432	JLJGJGIB_03266
yihQ		Sulfoquinovosidase	102	102	1	1	15386				1562	2036	2028	DGJMBLJC_00898	HFDHOMNF_01835	ALEPGING_02941	GEOGNNEI_01959	BINKDPLB_01617	IPPPMGOG_03686	NCHKEDON_02101	PLMPIJHD_02051	LIBHOFBA_01859	MFAGDJPO_01918	AICMNGMC_01892	JAGDPAPJ_02051	JICHJFDH_04008	AHEHGMLM_02570	PABJNMJP_02999	MAPHOHON_03908	ONDKMJBG_02457	JDGDJJKN_03998	KLMHLHPE_03717	EGICBAEE_03937	LNEFCFII_04049	NILJAHBC_04066	KCIFOFJF_04033	CJCKLIFP_04075	IABBECJM_04118	LANDOHOG_04065	LOGCBOHO_04113	DKGFALGN_03653	PNFFMGCL_03077	BJCGHIIB_02958	NHHDDJBG_03165	LBLHELLM_03212	CGJPMKCI_03452	JOHJONHN_02955	CNEDDIJH_03423	JLJGJGIB_03257
yfhL		Ferredoxin YfhL	102	102	1	1	10668				260	269	260	DGJMBLJC_01011	HFDHOMNF_02917	ALEPGING_02553	GEOGNNEI_02843	BINKDPLB_01971	IPPPMGOG_01452	NCHKEDON_01011	PLMPIJHD_02811	LIBHOFBA_02623	MFAGDJPO_01431	AICMNGMC_02931	JAGDPAPJ_02866	JICHJFDH_03487	AHEHGMLM_02095	PABJNMJP_04114	MAPHOHON_03819	ONDKMJBG_03246	JDGDJJKN_03141	KLMHLHPE_02335	EGICBAEE_01462	LNEFCFII_02065	NILJAHBC_02314	KCIFOFJF_03240	CJCKLIFP_01573	IABBECJM_01671	LANDOHOG_02039	LOGCBOHO_02076	DKGFALGN_02529	PNFFMGCL_01709	BJCGHIIB_02005	NHHDDJBG_01811	LBLHELLM_00920	CGJPMKCI_01866	JOHJONHN_02074	CNEDDIJH_01604	JLJGJGIB_01334
rlpA		Endolytic peptidoglycan transglycosylase RlpA	102	102	1	1	4929				713	1145	1125	DGJMBLJC_01053	HFDHOMNF_03197	ALEPGING_00049	GEOGNNEI_04072	BINKDPLB_03827	IPPPMGOG_03117	NCHKEDON_04592	PLMPIJHD_04182	LIBHOFBA_04265	MFAGDJPO_04057	AICMNGMC_03985	JAGDPAPJ_04176	JICHJFDH_02920	AHEHGMLM_00284	PABJNMJP_02799	MAPHOHON_03721	ONDKMJBG_03739	JDGDJJKN_00817	KLMHLHPE_02842	EGICBAEE_03354	LNEFCFII_02997	NILJAHBC_03500	KCIFOFJF_03142	CJCKLIFP_03457	IABBECJM_03456	LANDOHOG_03454	LOGCBOHO_03184	DKGFALGN_02819	PNFFMGCL_03579	BJCGHIIB_02675	NHHDDJBG_03333	LBLHELLM_01670	CGJPMKCI_02685	JOHJONHN_03398	CNEDDIJH_04054	JLJGJGIB_03779
chrR		Quinone reductase	102	102	1	1	15020				503	584	570	DGJMBLJC_01761	HFDHOMNF_02089	ALEPGING_00622	GEOGNNEI_02160	BINKDPLB_02135	IPPPMGOG_03753	NCHKEDON_02606	PLMPIJHD_02202	LIBHOFBA_02010	MFAGDJPO_03945	AICMNGMC_02129	JAGDPAPJ_02202	JICHJFDH_01986	AHEHGMLM_03108	PABJNMJP_03173	MAPHOHON_04099	ONDKMJBG_03899	JDGDJJKN_04402	KLMHLHPE_04231	EGICBAEE_04126	LNEFCFII_04238	NILJAHBC_04342	KCIFOFJF_04258	CJCKLIFP_04348	IABBECJM_04376	LANDOHOG_04338	LOGCBOHO_04390	DKGFALGN_03997	PNFFMGCL_03844	BJCGHIIB_03950	NHHDDJBG_03822	LBLHELLM_03571	CGJPMKCI_03771	JOHJONHN_04000	CNEDDIJH_03691	JLJGJGIB_03564
group_1790		hypothetical protein	102	102	1	1	14399				230	1280	1256	DGJMBLJC_01916	HFDHOMNF_01929	ALEPGING_01501	GEOGNNEI_03938	BINKDPLB_03675	IPPPMGOG_04544	NCHKEDON_03357	PLMPIJHD_01735	LIBHOFBA_01544	MFAGDJPO_01716	AICMNGMC_01594	JAGDPAPJ_01737	JICHJFDH_03326	AHEHGMLM_03424	PABJNMJP_04701	MAPHOHON_02996	ONDKMJBG_03600	JDGDJJKN_03418	KLMHLHPE_02617	EGICBAEE_03582	LNEFCFII_03579	NILJAHBC_03276	KCIFOFJF_03512	CJCKLIFP_03279	IABBECJM_03322	LANDOHOG_03320	LOGCBOHO_03006	DKGFALGN_03505	PNFFMGCL_02691	BJCGHIIB_02495	NHHDDJBG_02305	LBLHELLM_02459	CGJPMKCI_02293	JOHJONHN_03108	CNEDDIJH_02974	JLJGJGIB_01796
gpmI		2,3-bisphosphoglycerate-independent phosphoglycerate mutase	102	102	1	1	14125				296	1589	1525	DGJMBLJC_02070	HFDHOMNF_04037	ALEPGING_02854	GEOGNNEI_03717	BINKDPLB_04016	IPPPMGOG_02760	NCHKEDON_02468	PLMPIJHD_03997	LIBHOFBA_04082	MFAGDJPO_03807	AICMNGMC_02423	JAGDPAPJ_03997	JICHJFDH_01039	AHEHGMLM_01461	PABJNMJP_03611	MAPHOHON_02801	ONDKMJBG_04088	JDGDJJKN_03274	KLMHLHPE_02467	EGICBAEE_03133	LNEFCFII_02838	NILJAHBC_03127	KCIFOFJF_02921	CJCKLIFP_03084	IABBECJM_03127	LANDOHOG_03125	LOGCBOHO_02811	DKGFALGN_02642	PNFFMGCL_02543	BJCGHIIB_02347	NHHDDJBG_02157	LBLHELLM_02245	CGJPMKCI_02862	JOHJONHN_02533	CNEDDIJH_02254	JLJGJGIB_02464
tktB		Transketolase 2	102	102	1	1	10449				428	2000	1977	DGJMBLJC_02147	HFDHOMNF_03031	ALEPGING_00142	GEOGNNEI_02741	BINKDPLB_01869	IPPPMGOG_00873	NCHKEDON_00909	PLMPIJHD_02709	LIBHOFBA_02521	MFAGDJPO_01329	AICMNGMC_02829	JAGDPAPJ_02764	JICHJFDH_02333	AHEHGMLM_02801	PABJNMJP_04011	MAPHOHON_02403	ONDKMJBG_03142	JDGDJJKN_03032	KLMHLHPE_02233	EGICBAEE_01360	LNEFCFII_01963	NILJAHBC_02417	KCIFOFJF_03343	CJCKLIFP_01470	IABBECJM_01774	LANDOHOG_01936	LOGCBOHO_02179	DKGFALGN_02427	PNFFMGCL_01811	BJCGHIIB_01903	NHHDDJBG_01709	LBLHELLM_01022	CGJPMKCI_01968	JOHJONHN_02176	CNEDDIJH_01502	JLJGJGIB_01436
pdeA		putative cyclic di-GMP phosphodiesterase PdeA	102	102	1	1	10355				524	2189	2159	DGJMBLJC_02214	HFDHOMNF_04537	ALEPGING_04070	GEOGNNEI_02678	BINKDPLB_01806	IPPPMGOG_00936	NCHKEDON_00846	PLMPIJHD_02646	LIBHOFBA_02458	MFAGDJPO_01266	AICMNGMC_02766	JAGDPAPJ_02701	JICHJFDH_02393	AHEHGMLM_02865	PABJNMJP_03948	MAPHOHON_02466	ONDKMJBG_03079	JDGDJJKN_02968	KLMHLHPE_02170	EGICBAEE_01298	LNEFCFII_01901	NILJAHBC_02480	KCIFOFJF_02370	CJCKLIFP_01407	IABBECJM_01837	LANDOHOG_01873	LOGCBOHO_02242	DKGFALGN_02364	PNFFMGCL_01874	BJCGHIIB_04356	NHHDDJBG_04352	LBLHELLM_01085	CGJPMKCI_04332	JOHJONHN_01818	CNEDDIJH_02346	JLJGJGIB_04149
group_1831		hypothetical protein	102	102	1	1	9966				461	674	567	DGJMBLJC_02353	HFDHOMNF_04663	ALEPGING_00647	GEOGNNEI_02480	BINKDPLB_00847	IPPPMGOG_00763	NCHKEDON_00656	PLMPIJHD_02456	LIBHOFBA_02267	MFAGDJPO_01076	AICMNGMC_02576	JAGDPAPJ_02511	JICHJFDH_03121	AHEHGMLM_01171	PABJNMJP_03758	MAPHOHON_02656	ONDKMJBG_02888	JDGDJJKN_02779	KLMHLHPE_03055	EGICBAEE_01108	LNEFCFII_01711	NILJAHBC_02668	KCIFOFJF_02558	CJCKLIFP_01219	IABBECJM_02025	LANDOHOG_01685	LOGCBOHO_02430	DKGFALGN_03131	PNFFMGCL_01992	BJCGHIIB_03199	NHHDDJBG_02762	LBLHELLM_02871	CGJPMKCI_03174	JOHJONHN_02007	CNEDDIJH_04279	JLJGJGIB_03940
yhbY		RNA-binding protein YhbY	102	102	1	1	13435				332	332	332	DGJMBLJC_01559	HFDHOMNF_01216	ALEPGING_01356	GEOGNNEI_01837	BINKDPLB_03548	IPPPMGOG_03584	NCHKEDON_01408	PLMPIJHD_01762	LIBHOFBA_01571	MFAGDJPO_01743	AICMNGMC_01621	JAGDPAPJ_01764	JICHJFDH_03906	AHEHGMLM_04216	PABJNMJP_02357	MAPHOHON_03285	ONDKMJBG_03487	JDGDJJKN_01083	KLMHLHPE_04116	EGICBAEE_03815	LNEFCFII_03904	NILJAHBC_03922	KCIFOFJF_03837	CJCKLIFP_03624	IABBECJM_03667	LANDOHOG_03921	LOGCBOHO_03522	DKGFALGN_03532	PNFFMGCL_03247	BJCGHIIB_03512	NHHDDJBG_03488	LBLHELLM_03456	CGJPMKCI_03482	JOHJONHN_03758	CNEDDIJH_03280	JLJGJGIB_03449
group_1844		hypothetical protein	102	102	1	1	13942				350	833	822	DGJMBLJC_02553	HFDHOMNF_04135	ALEPGING_03548	GEOGNNEI_03809	BINKDPLB_04108	IPPPMGOG_03799	NCHKEDON_02560	PLMPIJHD_04089	LIBHOFBA_04174	MFAGDJPO_03899	AICMNGMC_02515	JAGDPAPJ_04089	JICHJFDH_00947	AHEHGMLM_01369	PABJNMJP_03519	MAPHOHON_02709	ONDKMJBG_04180	JDGDJJKN_03182	KLMHLHPE_02375	EGICBAEE_03225	LNEFCFII_02746	NILJAHBC_03035	KCIFOFJF_03013	CJCKLIFP_02992	IABBECJM_03035	LANDOHOG_03033	LOGCBOHO_02719	DKGFALGN_02734	PNFFMGCL_02451	BJCGHIIB_02255	NHHDDJBG_02065	LBLHELLM_02337	CGJPMKCI_02770	JOHJONHN_02441	CNEDDIJH_04502	JLJGJGIB_04193
groS		10 kDa chaperonin	102	102	1	1	16071				293	293	293	DGJMBLJC_00337	HFDHOMNF_04316	ALEPGING_01958	GEOGNNEI_03485	BINKDPLB_04392	IPPPMGOG_02938	NCHKEDON_04333	PLMPIJHD_03759	LIBHOFBA_03849	MFAGDJPO_03569	AICMNGMC_03759	JAGDPAPJ_03760	JICHJFDH_02692	AHEHGMLM_01816	PABJNMJP_00595	MAPHOHON_01322	ONDKMJBG_02183	JDGDJJKN_02713	KLMHLHPE_03638	EGICBAEE_02697	LNEFCFII_02588	NILJAHBC_01322	KCIFOFJF_02744	CJCKLIFP_02833	IABBECJM_02931	LANDOHOG_02929	LOGCBOHO_02561	DKGFALGN_03015	PNFFMGCL_03473	BJCGHIIB_03816	NHHDDJBG_02435	LBLHELLM_02542	CGJPMKCI_02423	JOHJONHN_04194	CNEDDIJH_01860	JLJGJGIB_01878
rpoZ		DNA-directed RNA polymerase subunit omega	102	102	1	1	14060				275	275	275	DGJMBLJC_02109	HFDHOMNF_04077	ALEPGING_03132	GEOGNNEI_03755	BINKDPLB_04054	IPPPMGOG_02722	NCHKEDON_02506	PLMPIJHD_04035	LIBHOFBA_04120	MFAGDJPO_03845	AICMNGMC_02461	JAGDPAPJ_04035	JICHJFDH_01001	AHEHGMLM_01423	PABJNMJP_03573	MAPHOHON_02763	ONDKMJBG_04126	JDGDJJKN_03237	KLMHLHPE_02429	EGICBAEE_03171	LNEFCFII_02800	NILJAHBC_03089	KCIFOFJF_02959	CJCKLIFP_03046	IABBECJM_03089	LANDOHOG_03087	LOGCBOHO_02773	DKGFALGN_02680	PNFFMGCL_02505	BJCGHIIB_02309	NHHDDJBG_02119	LBLHELLM_02283	CGJPMKCI_02824	JOHJONHN_02495	CNEDDIJH_02216	JLJGJGIB_02426
rpmF		50S ribosomal protein L32	102	102	1	1	5920				173	173	173	DGJMBLJC_03943	HFDHOMNF_00156	ALEPGING_02217	GEOGNNEI_01037	BINKDPLB_04261	IPPPMGOG_02048	NCHKEDON_00102	PLMPIJHD_00894	LIBHOFBA_00706	MFAGDJPO_00896	AICMNGMC_00897	JAGDPAPJ_01040	JICHJFDH_01268	AHEHGMLM_01588	PABJNMJP_01555	MAPHOHON_01039	ONDKMJBG_00928	JDGDJJKN_00381	KLMHLHPE_00779	EGICBAEE_02910	LNEFCFII_00137	NILJAHBC_00137	KCIFOFJF_01041	CJCKLIFP_00137	IABBECJM_01041	LANDOHOG_01040	LOGCBOHO_01040	DKGFALGN_00137	PNFFMGCL_01097	BJCGHIIB_00574	NHHDDJBG_00757	LBLHELLM_00588	CGJPMKCI_00136	JOHJONHN_01213	CNEDDIJH_02544	JLJGJGIB_02696
benM_1		HTH-type transcriptional regulator BenM	102	102	1	1	6866				527	899	889	DGJMBLJC_02628	HFDHOMNF_00476	ALEPGING_02099	GEOGNNEI_00741	BINKDPLB_02649	IPPPMGOG_01752	NCHKEDON_00398	PLMPIJHD_00598	LIBHOFBA_00410	MFAGDJPO_00600	AICMNGMC_00600	JAGDPAPJ_00744	JICHJFDH_04412	AHEHGMLM_00387	PABJNMJP_01259	MAPHOHON_00743	ONDKMJBG_01224	JDGDJJKN_00090	KLMHLHPE_00483	EGICBAEE_00345	LNEFCFII_00433	NILJAHBC_00434	KCIFOFJF_00744	CJCKLIFP_00434	IABBECJM_00744	LANDOHOG_00743	LOGCBOHO_00743	DKGFALGN_00433	PNFFMGCL_00741	BJCGHIIB_00218	NHHDDJBG_00461	LBLHELLM_00884	CGJPMKCI_00432	JOHJONHN_00519	CNEDDIJH_00285	JLJGJGIB_02033
hha		Hemolysin expression-modulating protein Hha	102	102	1	1	393				218	218	218	DGJMBLJC_00772	HFDHOMNF_01657	ALEPGING_00576	GEOGNNEI_01772	BINKDPLB_01715	IPPPMGOG_00495	NCHKEDON_03005	PLMPIJHD_01566	LIBHOFBA_01376	MFAGDJPO_01547	AICMNGMC_04624	JAGDPAPJ_04678	JICHJFDH_00225	AHEHGMLM_03582	PABJNMJP_01975	MAPHOHON_03597	ONDKMJBG_04388	JDGDJJKN_03735	KLMHLHPE_03467	EGICBAEE_02376	LNEFCFII_03476	NILJAHBC_02791	KCIFOFJF_02089	CJCKLIFP_02661	IABBECJM_02703	LANDOHOG_02553	LOGCBOHO_03772	DKGFALGN_02262	PNFFMGCL_03162	BJCGHIIB_03319	NHHDDJBG_02928	LBLHELLM_03054	CGJPMKCI_03274	JOHJONHN_02848	CNEDDIJH_02892	JLJGJGIB_02914
minE		Cell division topological specificity factor	102	102	1	1	7559				266	266	266	DGJMBLJC_03194	HFDHOMNF_00833	ALEPGING_00208	GEOGNNEI_00405	BINKDPLB_03158	IPPPMGOG_02359	NCHKEDON_03901	PLMPIJHD_00263	LIBHOFBA_00072	MFAGDJPO_00263	AICMNGMC_00263	JAGDPAPJ_00406	JICHJFDH_00397	AHEHGMLM_00725	PABJNMJP_00922	MAPHOHON_00406	ONDKMJBG_01561	JDGDJJKN_01974	KLMHLHPE_00147	EGICBAEE_00008	LNEFCFII_00770	NILJAHBC_00772	KCIFOFJF_00406	CJCKLIFP_00772	IABBECJM_00406	LANDOHOG_00405	LOGCBOHO_00405	DKGFALGN_00770	PNFFMGCL_00405	BJCGHIIB_01249	NHHDDJBG_01955	LBLHELLM_02041	CGJPMKCI_00781	JOHJONHN_00181	CNEDDIJH_01073	JLJGJGIB_00326
yjiG		Inner membrane protein YjiG	102	102	1	1	11367				461	461	461	DGJMBLJC_00149	HFDHOMNF_02339	ALEPGING_00789	GEOGNNEI_03063	BINKDPLB_01186	IPPPMGOG_04398	NCHKEDON_03501	PLMPIJHD_03306	LIBHOFBA_03081	MFAGDJPO_02406	AICMNGMC_03327	JAGDPAPJ_03324	JICHJFDH_02039	AHEHGMLM_00221	PABJNMJP_04239	MAPHOHON_01497	ONDKMJBG_00160	JDGDJJKN_02528	KLMHLHPE_01493	EGICBAEE_01811	LNEFCFII_02414	NILJAHBC_01497	KCIFOFJF_01261	CJCKLIFP_01922	IABBECJM_02150	LANDOHOG_02149	LOGCBOHO_01727	DKGFALGN_01709	PNFFMGCL_02312	BJCGHIIB_02158	NHHDDJBG_01125	LBLHELLM_01242	CGJPMKCI_02147	JOHJONHN_02344	CNEDDIJH_01756	JLJGJGIB_01604
feoA		Fe(2+) transport protein A	102	102	1	1	14493				227	227	227	DGJMBLJC_01854	HFDHOMNF_03581	ALEPGING_01725	GEOGNNEI_03888	BINKDPLB_03625	IPPPMGOG_04594	NCHKEDON_03307	PLMPIJHD_01685	LIBHOFBA_01494	MFAGDJPO_01666	AICMNGMC_01544	JAGDPAPJ_01687	JICHJFDH_03376	AHEHGMLM_03474	PABJNMJP_04651	MAPHOHON_02946	ONDKMJBG_03550	JDGDJJKN_03472	KLMHLHPE_02667	EGICBAEE_03631	LNEFCFII_03628	NILJAHBC_03326	KCIFOFJF_03562	CJCKLIFP_03229	IABBECJM_03272	LANDOHOG_03270	LOGCBOHO_02956	DKGFALGN_03455	PNFFMGCL_02741	BJCGHIIB_02545	NHHDDJBG_02355	LBLHELLM_02409	CGJPMKCI_02343	JOHJONHN_03158	CNEDDIJH_03023	JLJGJGIB_01746
rpmG		50S ribosomal protein L33	102	102	1	1	14089				167	167	167	DGJMBLJC_02095	HFDHOMNF_04063	ALEPGING_03613	GEOGNNEI_03741	BINKDPLB_04040	IPPPMGOG_02736	NCHKEDON_02492	PLMPIJHD_04021	LIBHOFBA_04106	MFAGDJPO_03831	AICMNGMC_02447	JAGDPAPJ_04021	JICHJFDH_01015	AHEHGMLM_01437	PABJNMJP_03587	MAPHOHON_02777	ONDKMJBG_04112	JDGDJJKN_03251	KLMHLHPE_02443	EGICBAEE_03157	LNEFCFII_02814	NILJAHBC_03103	KCIFOFJF_02945	CJCKLIFP_03060	IABBECJM_03103	LANDOHOG_03101	LOGCBOHO_02787	DKGFALGN_02666	PNFFMGCL_02519	BJCGHIIB_02323	NHHDDJBG_02133	LBLHELLM_02269	CGJPMKCI_02838	JOHJONHN_02509	CNEDDIJH_02230	JLJGJGIB_02440
group_18467		hypothetical protein	102	102	1	1	11253				161	161	161	DGJMBLJC_00099	HFDHOMNF_02376	ALEPGING_00893	GEOGNNEI_03100	BINKDPLB_01223	IPPPMGOG_04361	NCHKEDON_03538	PLMPIJHD_03343	LIBHOFBA_03118	MFAGDJPO_02443	AICMNGMC_03364	JAGDPAPJ_03361	JICHJFDH_02221	AHEHGMLM_03344	PABJNMJP_04328	MAPHOHON_01586	ONDKMJBG_00249	JDGDJJKN_02481	KLMHLHPE_01530	EGICBAEE_01774	LNEFCFII_02377	NILJAHBC_01534	KCIFOFJF_01298	CJCKLIFP_01885	IABBECJM_02187	LANDOHOG_02186	LOGCBOHO_01764	DKGFALGN_01746	PNFFMGCL_02349	BJCGHIIB_02120	NHHDDJBG_01162	LBLHELLM_01205	CGJPMKCI_02110	JOHJONHN_02307	CNEDDIJH_01719	JLJGJGIB_01567
rpsL		30S ribosomal protein S12	102	102	1	1	14577				374	374	374	DGJMBLJC_01793	HFDHOMNF_03646	ALEPGING_03842	GEOGNNEI_03832	BINKDPLB_03569	IPPPMGOG_02226	NCHKEDON_01667	PLMPIJHD_01629	LIBHOFBA_01438	MFAGDJPO_01610	AICMNGMC_01488	JAGDPAPJ_01631	JICHJFDH_03433	AHEHGMLM_01964	PABJNMJP_02616	MAPHOHON_02890	ONDKMJBG_03494	JDGDJJKN_04467	KLMHLHPE_02723	EGICBAEE_03687	LNEFCFII_03684	NILJAHBC_03382	KCIFOFJF_03618	CJCKLIFP_03173	IABBECJM_03216	LANDOHOG_03214	LOGCBOHO_02900	DKGFALGN_03399	PNFFMGCL_02797	BJCGHIIB_02601	NHHDDJBG_02411	LBLHELLM_02353	CGJPMKCI_02399	JOHJONHN_03214	CNEDDIJH_03079	JLJGJGIB_01690
rpmA		50S ribosomal protein L27	102	102	1	1	13444				257	257	257	DGJMBLJC_01552	HFDHOMNF_01224	ALEPGING_00964	GEOGNNEI_02395	BINKDPLB_02583	IPPPMGOG_00015	NCHKEDON_01286	PLMPIJHD_03023	LIBHOFBA_02835	MFAGDJPO_02804	AICMNGMC_03088	JAGDPAPJ_03023	JICHJFDH_03666	AHEHGMLM_04209	PABJNMJP_02350	MAPHOHON_03278	ONDKMJBG_04585	JDGDJJKN_01077	KLMHLHPE_04374	EGICBAEE_04441	LNEFCFII_04432	NILJAHBC_04470	KCIFOFJF_04423	CJCKLIFP_03631	IABBECJM_03674	LANDOHOG_04466	LOGCBOHO_03529	DKGFALGN_04293	PNFFMGCL_04131	BJCGHIIB_04209	NHHDDJBG_04069	LBLHELLM_04047	CGJPMKCI_04073	JOHJONHN_04400	CNEDDIJH_04285	JLJGJGIB_04338
cspC		Cold shock-like protein CspC	102	102	1	1	7581				209	209	209	DGJMBLJC_03173	HFDHOMNF_00854	ALEPGING_00188	GEOGNNEI_00385	BINKDPLB_03178	IPPPMGOG_02379	NCHKEDON_03921	PLMPIJHD_00243	LIBHOFBA_00052	MFAGDJPO_00243	AICMNGMC_00243	JAGDPAPJ_00386	JICHJFDH_00377	AHEHGMLM_00745	PABJNMJP_00902	MAPHOHON_00386	ONDKMJBG_01581	JDGDJJKN_01954	KLMHLHPE_00127	EGICBAEE_02282	LNEFCFII_00790	NILJAHBC_00792	KCIFOFJF_00386	CJCKLIFP_00792	IABBECJM_00386	LANDOHOG_00385	LOGCBOHO_00385	DKGFALGN_00790	PNFFMGCL_00385	BJCGHIIB_01269	NHHDDJBG_01975	LBLHELLM_02021	CGJPMKCI_00801	JOHJONHN_00161	CNEDDIJH_01093	JLJGJGIB_00346
glnB		Nitrogen regulatory protein P-II 1	102	102	1	1	10646				338	338	338	DGJMBLJC_00995	HFDHOMNF_02933	ALEPGING_00847	GEOGNNEI_02829	BINKDPLB_01957	IPPPMGOG_01438	NCHKEDON_00997	PLMPIJHD_02797	LIBHOFBA_02609	MFAGDJPO_01417	AICMNGMC_02917	JAGDPAPJ_02852	JICHJFDH_03501	AHEHGMLM_02109	PABJNMJP_04100	MAPHOHON_03833	ONDKMJBG_03232	JDGDJJKN_03127	KLMHLHPE_02321	EGICBAEE_01448	LNEFCFII_02051	NILJAHBC_02328	KCIFOFJF_03254	CJCKLIFP_01559	IABBECJM_01685	LANDOHOG_02025	LOGCBOHO_02090	DKGFALGN_02515	PNFFMGCL_01723	BJCGHIIB_01991	NHHDDJBG_01797	LBLHELLM_00934	CGJPMKCI_01880	JOHJONHN_02088	CNEDDIJH_01590	JLJGJGIB_01348
hupA		DNA-binding protein HU-alpha	102	102	1	1	15691				272	272	272	DGJMBLJC_02762	HFDHOMNF_02768	ALEPGING_01162	GEOGNNEI_02876	BINKDPLB_02980	IPPPMGOG_01351	NCHKEDON_02757	PLMPIJHD_03123	LIBHOFBA_02886	MFAGDJPO_02900	AICMNGMC_03097	JAGDPAPJ_03129	JICHJFDH_03592	AHEHGMLM_03704	PABJNMJP_02701	MAPHOHON_04572	ONDKMJBG_00070	JDGDJJKN_04430	KLMHLHPE_04425	EGICBAEE_04492	LNEFCFII_04546	NILJAHBC_04521	KCIFOFJF_04521	CJCKLIFP_04519	IABBECJM_04518	LANDOHOG_04533	LOGCBOHO_04536	DKGFALGN_04434	PNFFMGCL_04249	BJCGHIIB_04257	NHHDDJBG_04264	LBLHELLM_04178	CGJPMKCI_04123	JOHJONHN_04497	CNEDDIJH_04483	JLJGJGIB_04358
tatA		Sec-independent protein translocase protein TatA	102	102	1	1	15320				254	254	254	DGJMBLJC_01698	HFDHOMNF_01968	ALEPGING_01938	GEOGNNEI_02107	BINKDPLB_02960	IPPPMGOG_01262	NCHKEDON_04440	PLMPIJHD_02149	LIBHOFBA_01957	MFAGDJPO_02016	AICMNGMC_01990	JAGDPAPJ_02149	JICHJFDH_03802	AHEHGMLM_02367	PABJNMJP_00705	MAPHOHON_04000	ONDKMJBG_02038	JDGDJJKN_04205	KLMHLHPE_04193	EGICBAEE_04088	LNEFCFII_04141	NILJAHBC_04158	KCIFOFJF_04072	CJCKLIFP_04164	IABBECJM_04266	LANDOHOG_04213	LOGCBOHO_04264	DKGFALGN_03804	PNFFMGCL_03791	BJCGHIIB_03621	NHHDDJBG_03655	LBLHELLM_03533	CGJPMKCI_03591	JOHJONHN_03889	CNEDDIJH_03515	JLJGJGIB_03525
cheY		Chemotaxis protein CheY	102	102	1	1	8983				389	389	389	DGJMBLJC_03085	HFDHOMNF_00934	ALEPGING_02012	GEOGNNEI_00305	BINKDPLB_03257	IPPPMGOG_02458	NCHKEDON_04000	PLMPIJHD_00163	LIBHOFBA_03450	MFAGDJPO_00163	AICMNGMC_00163	JAGDPAPJ_00306	JICHJFDH_02305	AHEHGMLM_00825	PABJNMJP_00822	MAPHOHON_00306	ONDKMJBG_01660	JDGDJJKN_01876	KLMHLHPE_01837	EGICBAEE_02202	LNEFCFII_00869	NILJAHBC_00871	KCIFOFJF_00306	CJCKLIFP_00871	IABBECJM_00306	LANDOHOG_00305	LOGCBOHO_00305	DKGFALGN_00869	PNFFMGCL_00305	BJCGHIIB_01348	NHHDDJBG_03708	LBLHELLM_03886	CGJPMKCI_01338	JOHJONHN_00081	CNEDDIJH_01171	JLJGJGIB_00425
rpsJ		30S ribosomal protein S10	102	102	1	1	14586				311	311	311	DGJMBLJC_02813	HFDHOMNF_02818	ALEPGING_01848	GEOGNNEI_02941	BINKDPLB_03148	IPPPMGOG_02120	NCHKEDON_01660	PLMPIJHD_03188	LIBHOFBA_02951	MFAGDJPO_02965	AICMNGMC_03169	JAGDPAPJ_03194	JICHJFDH_01157	AHEHGMLM_04346	PABJNMJP_01700	MAPHOHON_04656	ONDKMJBG_00005	JDGDJJKN_04474	KLMHLHPE_04452	EGICBAEE_04557	LNEFCFII_04595	NILJAHBC_04613	KCIFOFJF_04613	CJCKLIFP_04573	IABBECJM_04610	LANDOHOG_04571	LOGCBOHO_04574	DKGFALGN_04493	PNFFMGCL_04314	BJCGHIIB_04322	NHHDDJBG_04274	LBLHELLM_04227	CGJPMKCI_04276	JOHJONHN_04546	CNEDDIJH_04558	JLJGJGIB_04315
group_18478		hypothetical protein	102	102	1	1	6899				341	341	341	DGJMBLJC_04306	HFDHOMNF_00495	ALEPGING_02972	GEOGNNEI_00725	BINKDPLB_02665	IPPPMGOG_01736	NCHKEDON_00414	PLMPIJHD_00582	LIBHOFBA_00394	MFAGDJPO_00584	AICMNGMC_00584	JAGDPAPJ_00728	JICHJFDH_00716	AHEHGMLM_00403	PABJNMJP_01243	MAPHOHON_00727	ONDKMJBG_01240	JDGDJJKN_00074	KLMHLHPE_00467	EGICBAEE_00329	LNEFCFII_00449	NILJAHBC_00450	KCIFOFJF_00728	CJCKLIFP_00450	IABBECJM_00728	LANDOHOG_00727	LOGCBOHO_00727	DKGFALGN_00449	PNFFMGCL_00725	BJCGHIIB_00202	NHHDDJBG_01453	LBLHELLM_01944	CGJPMKCI_00448	JOHJONHN_00503	CNEDDIJH_00301	JLJGJGIB_00006
trkA		Trk system potassium uptake protein TrkA	102	102	1	1	14624				1376	1376	1376	DGJMBLJC_02779	HFDHOMNF_02786	ALEPGING_01816	GEOGNNEI_02909	BINKDPLB_03116	IPPPMGOG_02088	NCHKEDON_01628	PLMPIJHD_03156	LIBHOFBA_02919	MFAGDJPO_02933	AICMNGMC_03137	JAGDPAPJ_03162	JICHJFDH_01125	AHEHGMLM_04314	PABJNMJP_01732	MAPHOHON_04624	ONDKMJBG_00037	JDGDJJKN_04506	KLMHLHPE_04484	EGICBAEE_04525	LNEFCFII_04563	NILJAHBC_04581	KCIFOFJF_04581	CJCKLIFP_04605	IABBECJM_04578	LANDOHOG_04603	LOGCBOHO_04606	DKGFALGN_04525	PNFFMGCL_04282	BJCGHIIB_04290	NHHDDJBG_04306	LBLHELLM_04195	CGJPMKCI_04244	JOHJONHN_04514	CNEDDIJH_04526	JLJGJGIB_04278
katG		Catalase-peroxidase	102	102	1	1	15605				2180	2180	2180	DGJMBLJC_00808	HFDHOMNF_01740	ALEPGING_01528	GEOGNNEI_02193	BINKDPLB_02246	IPPPMGOG_03596	NCHKEDON_03197	PLMPIJHD_02317	LIBHOFBA_02126	MFAGDJPO_02112	AICMNGMC_02237	JAGDPAPJ_02310	JICHJFDH_03918	AHEHGMLM_02388	PABJNMJP_04745	MAPHOHON_04348	ONDKMJBG_04528	JDGDJJKN_03905	KLMHLHPE_03807	EGICBAEE_04293	LNEFCFII_04285	NILJAHBC_04284	KCIFOFJF_04163	CJCKLIFP_04255	IABBECJM_04333	LANDOHOG_04280	LOGCBOHO_04332	DKGFALGN_04155	PNFFMGCL_02949	BJCGHIIB_03086	NHHDDJBG_03255	LBLHELLM_03122	CGJPMKCI_03362	JOHJONHN_04575	CNEDDIJH_03861	JLJGJGIB_04028
cvpA		Colicin V production protein	102	102	1	1	10066				488	488	488	DGJMBLJC_02272	HFDHOMNF_04589	ALEPGING_02262	GEOGNNEI_02549	BINKDPLB_00916	IPPPMGOG_00694	NCHKEDON_00725	PLMPIJHD_02525	LIBHOFBA_02336	MFAGDJPO_01145	AICMNGMC_02645	JAGDPAPJ_02580	JICHJFDH_03190	AHEHGMLM_01241	PABJNMJP_03828	MAPHOHON_02586	ONDKMJBG_02958	JDGDJJKN_02848	KLMHLHPE_02986	EGICBAEE_01177	LNEFCFII_01780	NILJAHBC_02599	KCIFOFJF_02489	CJCKLIFP_01288	IABBECJM_01956	LANDOHOG_01754	LOGCBOHO_02361	DKGFALGN_03200	PNFFMGCL_01923	BJCGHIIB_03130	NHHDDJBG_02831	LBLHELLM_02940	CGJPMKCI_03105	JOHJONHN_01938	CNEDDIJH_02466	JLJGJGIB_03166
efp		Elongation factor P	102	102	1	1	16080				566	566	566	DGJMBLJC_00332	HFDHOMNF_04321	ALEPGING_01963	GEOGNNEI_03480	BINKDPLB_04387	IPPPMGOG_02933	NCHKEDON_04338	PLMPIJHD_03754	LIBHOFBA_03844	MFAGDJPO_03564	AICMNGMC_03754	JAGDPAPJ_03755	JICHJFDH_02697	AHEHGMLM_01811	PABJNMJP_00600	MAPHOHON_01327	ONDKMJBG_02178	JDGDJJKN_02708	KLMHLHPE_03633	EGICBAEE_02692	LNEFCFII_02583	NILJAHBC_01327	KCIFOFJF_02749	CJCKLIFP_02828	IABBECJM_02936	LANDOHOG_02934	LOGCBOHO_02556	DKGFALGN_03020	PNFFMGCL_03468	BJCGHIIB_03821	NHHDDJBG_02430	LBLHELLM_02537	CGJPMKCI_02418	JOHJONHN_04199	CNEDDIJH_01855	JLJGJGIB_01873
cysE_2		Serine acetyltransferase	102	102	1	1	14131				821	821	821	DGJMBLJC_02065	HFDHOMNF_04032	ALEPGING_02859	GEOGNNEI_03712	BINKDPLB_04011	IPPPMGOG_02765	NCHKEDON_02463	PLMPIJHD_03992	LIBHOFBA_04077	MFAGDJPO_03802	AICMNGMC_02418	JAGDPAPJ_03992	JICHJFDH_01044	AHEHGMLM_01466	PABJNMJP_03616	MAPHOHON_02806	ONDKMJBG_04083	JDGDJJKN_03279	KLMHLHPE_02472	EGICBAEE_03128	LNEFCFII_02843	NILJAHBC_03132	KCIFOFJF_02916	CJCKLIFP_03089	IABBECJM_03132	LANDOHOG_03130	LOGCBOHO_02816	DKGFALGN_02637	PNFFMGCL_02548	BJCGHIIB_02352	NHHDDJBG_02162	LBLHELLM_02240	CGJPMKCI_02867	JOHJONHN_02538	CNEDDIJH_02259	JLJGJGIB_02469
lrp_2		Leucine-responsive regulatory protein	102	102	1	1	5411				494	494	494	DGJMBLJC_01173	HFDHOMNF_01316	ALEPGING_04183	GEOGNNEI_04454	BINKDPLB_03091	IPPPMGOG_03390	NCHKEDON_03251	PLMPIJHD_04565	LIBHOFBA_04648	MFAGDJPO_04584	AICMNGMC_04373	JAGDPAPJ_04558	JICHJFDH_00872	AHEHGMLM_02258	PABJNMJP_01841	MAPHOHON_03418	ONDKMJBG_04231	JDGDJJKN_00559	KLMHLHPE_03310	EGICBAEE_03463	LNEFCFII_03320	NILJAHBC_03668	KCIFOFJF_03453	CJCKLIFP_03777	IABBECJM_03820	LANDOHOG_03607	LOGCBOHO_03675	DKGFALGN_03359	PNFFMGCL_04165	BJCGHIIB_03724	NHHDDJBG_03387	LBLHELLM_04081	CGJPMKCI_03700	JOHJONHN_03657	CNEDDIJH_03179	JLJGJGIB_02647
dapD		2,3,4,5-tetrahydropyridine-2,6-dicarboxylate N-succinyltransferase	102	102	1	1	10766				824	824	824	DGJMBLJC_04804	HFDHOMNF_02659	ALEPGING_00276	GEOGNNEI_03350	BINKDPLB_00626	IPPPMGOG_00226	NCHKEDON_01075	PLMPIJHD_03593	LIBHOFBA_03368	MFAGDJPO_02229	AICMNGMC_03614	JAGDPAPJ_03611	JICHJFDH_01379	AHEHGMLM_00032	PABJNMJP_04578	MAPHOHON_01836	ONDKMJBG_00499	JDGDJJKN_04305	KLMHLHPE_01780	EGICBAEE_01524	LNEFCFII_02127	NILJAHBC_01784	KCIFOFJF_01548	CJCKLIFP_01635	IABBECJM_02437	LANDOHOG_02436	LOGCBOHO_02014	DKGFALGN_01996	PNFFMGCL_02193	BJCGHIIB_01814	NHHDDJBG_01286	LBLHELLM_01500	CGJPMKCI_01804	JOHJONHN_01651	CNEDDIJH_01413	JLJGJGIB_01272
hflC		Modulator of FtsH protease HflC	102	102	1	1	16112				1004	1004	1004	DGJMBLJC_00303	HFDHOMNF_02181	ALEPGING_01990	GEOGNNEI_03452	BINKDPLB_04359	IPPPMGOG_02905	NCHKEDON_04366	PLMPIJHD_03726	LIBHOFBA_03816	MFAGDJPO_03536	AICMNGMC_03726	JAGDPAPJ_03727	JICHJFDH_02726	AHEHGMLM_01783	PABJNMJP_00628	MAPHOHON_01355	ONDKMJBG_02150	JDGDJJKN_02680	KLMHLHPE_03605	EGICBAEE_02664	LNEFCFII_02555	NILJAHBC_01355	KCIFOFJF_02777	CJCKLIFP_02800	IABBECJM_02964	LANDOHOG_02962	LOGCBOHO_02528	DKGFALGN_03048	PNFFMGCL_03439	BJCGHIIB_04032	NHHDDJBG_03904	LBLHELLM_03620	CGJPMKCI_03853	JOHJONHN_04149	CNEDDIJH_03972	JLJGJGIB_03614
trxA		Thioredoxin 1	102	102	1	1	15239				329	329	329	DGJMBLJC_01634	HFDHOMNF_02029	ALEPGING_04219	GEOGNNEI_02052	BINKDPLB_02494	IPPPMGOG_01317	NCHKEDON_04495	PLMPIJHD_02094	LIBHOFBA_01902	MFAGDJPO_01961	AICMNGMC_01935	JAGDPAPJ_02094	JICHJFDH_03856	AHEHGMLM_04440	PABJNMJP_00760	MAPHOHON_04055	ONDKMJBG_01983	JDGDJJKN_04147	KLMHLHPE_04138	EGICBAEE_04033	LNEFCFII_04196	NILJAHBC_04213	KCIFOFJF_04127	CJCKLIFP_04219	IABBECJM_04211	LANDOHOG_04158	LOGCBOHO_04209	DKGFALGN_03749	PNFFMGCL_03736	BJCGHIIB_03676	NHHDDJBG_03600	LBLHELLM_03478	CGJPMKCI_03646	JOHJONHN_03944	CNEDDIJH_03570	JLJGJGIB_03470
ypeA		Acetyltransferase YpeA	102	102	1	1	10409				425	425	425	DGJMBLJC_02174	HFDHOMNF_03057	ALEPGING_00119	GEOGNNEI_02718	BINKDPLB_01846	IPPPMGOG_00896	NCHKEDON_00886	PLMPIJHD_02686	LIBHOFBA_02498	MFAGDJPO_01306	AICMNGMC_02806	JAGDPAPJ_02741	JICHJFDH_02356	AHEHGMLM_02825	PABJNMJP_03988	MAPHOHON_02426	ONDKMJBG_03119	JDGDJJKN_03008	KLMHLHPE_02210	EGICBAEE_01337	LNEFCFII_01940	NILJAHBC_02440	KCIFOFJF_02330	CJCKLIFP_01447	IABBECJM_01797	LANDOHOG_01913	LOGCBOHO_02202	DKGFALGN_02404	PNFFMGCL_01834	BJCGHIIB_01880	NHHDDJBG_01686	LBLHELLM_01045	CGJPMKCI_01991	JOHJONHN_02199	CNEDDIJH_01479	JLJGJGIB_01459
rplT		50S ribosomal protein L20	102	102	1	1	6187				356	356	356	DGJMBLJC_03784	HFDHOMNF_00311	ALEPGING_01238	GEOGNNEI_00892	BINKDPLB_02235	IPPPMGOG_01903	NCHKEDON_00247	PLMPIJHD_00749	LIBHOFBA_00561	MFAGDJPO_00751	AICMNGMC_00752	JAGDPAPJ_00895	JICHJFDH_04261	AHEHGMLM_02946	PABJNMJP_01410	MAPHOHON_00894	ONDKMJBG_01073	JDGDJJKN_00240	KLMHLHPE_00634	EGICBAEE_00496	LNEFCFII_00282	NILJAHBC_00283	KCIFOFJF_00895	CJCKLIFP_00283	IABBECJM_00895	LANDOHOG_00894	LOGCBOHO_00894	DKGFALGN_00282	PNFFMGCL_00892	BJCGHIIB_00369	NHHDDJBG_00612	LBLHELLM_00733	CGJPMKCI_00281	JOHJONHN_01358	CNEDDIJH_00134	JLJGJGIB_02184
mprA		Transcriptional repressor MprA	102	102	1	1	2183				530	530	530	DGJMBLJC_01492	HFDHOMNF_03416	ALEPGING_02292	GEOGNNEI_01282	BINKDPLB_00043	IPPPMGOG_01113	NCHKEDON_02705	PLMPIJHD_01076	LIBHOFBA_00886	MFAGDJPO_03054	AICMNGMC_01077	JAGDPAPJ_01220	JICHJFDH_00088	AHEHGMLM_02679	PABJNMJP_00408	MAPHOHON_02277	ONDKMJBG_00577	JDGDJJKN_01606	KLMHLHPE_01322	EGICBAEE_00980	LNEFCFII_01262	NILJAHBC_01907	KCIFOFJF_01966	CJCKLIFP_02048	IABBECJM_01265	LANDOHOG_01556	LOGCBOHO_01556	DKGFALGN_01583	PNFFMGCL_01640	BJCGHIIB_01118	NHHDDJBG_00043	LBLHELLM_00044	CGJPMKCI_01278	JOHJONHN_01034	CNEDDIJH_00598	JLJGJGIB_00548
cpxR		Transcriptional regulatory protein CpxR	102	102	1	1	15460				698	701	698	DGJMBLJC_00848	HFDHOMNF_01788	ALEPGING_01374	GEOGNNEI_02002	BINKDPLB_01660	IPPPMGOG_03643	NCHKEDON_02058	PLMPIJHD_02008	LIBHOFBA_01816	MFAGDJPO_01875	AICMNGMC_01849	JAGDPAPJ_02008	JICHJFDH_03965	AHEHGMLM_02527	PABJNMJP_03042	MAPHOHON_03951	ONDKMJBG_02414	JDGDJJKN_03955	KLMHLHPE_03760	EGICBAEE_03980	LNEFCFII_04092	NILJAHBC_04109	KCIFOFJF_03990	CJCKLIFP_04118	IABBECJM_04161	LANDOHOG_04108	LOGCBOHO_04156	DKGFALGN_03696	PNFFMGCL_03034	BJCGHIIB_03001	NHHDDJBG_03208	LBLHELLM_03169	CGJPMKCI_03409	JOHJONHN_02998	CNEDDIJH_03466	JLJGJGIB_03300
phoB		Phosphate regulon transcriptional regulatory protein PhoB	102	102	1	1	505				689	689	689	DGJMBLJC_04929	HFDHOMNF_04354	ALEPGING_03175	GEOGNNEI_04342	BINKDPLB_02887	IPPPMGOG_00418	NCHKEDON_03138	PLMPIJHD_04453	LIBHOFBA_04536	MFAGDJPO_04328	AICMNGMC_04261	JAGDPAPJ_04446	JICHJFDH_02616	AHEHGMLM_03154	PABJNMJP_02190	MAPHOHON_03074	ONDKMJBG_02498	JDGDJJKN_03661	KLMHLHPE_03257	EGICBAEE_02452	LNEFCFII_03267	NILJAHBC_02867	KCIFOFJF_02165	CJCKLIFP_02585	IABBECJM_02627	LANDOHOG_02629	LOGCBOHO_03272	DKGFALGN_02186	PNFFMGCL_02815	BJCGHIIB_02806	NHHDDJBG_02596	LBLHELLM_02815	CGJPMKCI_03057	JOHJONHN_02635	CNEDDIJH_02159	JLJGJGIB_02231
uvrY		Response regulator UvrY	102	102	1	1	9035				656	656	656	DGJMBLJC_03054	HFDHOMNF_00965	ALEPGING_00832	GEOGNNEI_00276	BINKDPLB_03286	IPPPMGOG_02487	NCHKEDON_04029	PLMPIJHD_00134	LIBHOFBA_03479	MFAGDJPO_00134	AICMNGMC_00134	JAGDPAPJ_00277	JICHJFDH_02276	AHEHGMLM_00854	PABJNMJP_00793	MAPHOHON_00277	ONDKMJBG_01689	JDGDJJKN_01847	KLMHLHPE_01866	EGICBAEE_02173	LNEFCFII_00898	NILJAHBC_00900	KCIFOFJF_00277	CJCKLIFP_00900	IABBECJM_00277	LANDOHOG_00276	LOGCBOHO_00276	DKGFALGN_00898	PNFFMGCL_00276	BJCGHIIB_01377	NHHDDJBG_03679	LBLHELLM_03857	CGJPMKCI_01367	JOHJONHN_00052	CNEDDIJH_01200	JLJGJGIB_00454
nuoC		NADH-quinone oxidoreductase subunit C/D	102	102	1	1	10020				1802	1802	1802	DGJMBLJC_02314	HFDHOMNF_04627	ALEPGING_00680	GEOGNNEI_02513	BINKDPLB_00880	IPPPMGOG_00730	NCHKEDON_00689	PLMPIJHD_02489	LIBHOFBA_02300	MFAGDJPO_01109	AICMNGMC_02609	JAGDPAPJ_02544	JICHJFDH_03154	AHEHGMLM_01204	PABJNMJP_03791	MAPHOHON_02623	ONDKMJBG_02921	JDGDJJKN_02812	KLMHLHPE_03022	EGICBAEE_01141	LNEFCFII_01744	NILJAHBC_02635	KCIFOFJF_02525	CJCKLIFP_01252	IABBECJM_01992	LANDOHOG_01718	LOGCBOHO_02397	DKGFALGN_03164	PNFFMGCL_01959	BJCGHIIB_03166	NHHDDJBG_02795	LBLHELLM_02904	CGJPMKCI_03141	JOHJONHN_01974	CNEDDIJH_02502	JLJGJGIB_03202
fdhF_2		Formate dehydrogenase H	102	102	1	1	15944				419	419	419	DGJMBLJC_00495	HFDHOMNF_04270	ALEPGING_01441	GEOGNNEI_03528	BINKDPLB_04436	IPPPMGOG_02981	NCHKEDON_04289	PLMPIJHD_03803	LIBHOFBA_03893	MFAGDJPO_03613	AICMNGMC_03802	JAGDPAPJ_03804	JICHJFDH_04082	AHEHGMLM_01860	PABJNMJP_00552	MAPHOHON_01279	ONDKMJBG_02226	JDGDJJKN_03857	KLMHLHPE_03681	EGICBAEE_02740	LNEFCFII_02631	NILJAHBC_01278	KCIFOFJF_02701	CJCKLIFP_02877	IABBECJM_02887	LANDOHOG_02885	LOGCBOHO_02604	DKGFALGN_02972	PNFFMGCL_04352	BJCGHIIB_03773	NHHDDJBG_02478	LBLHELLM_02585	CGJPMKCI_02466	JOHJONHN_03319	CNEDDIJH_01904	JLJGJGIB_01921
pyrH		Uridylate kinase	102	102	1	1	10758				722	725	724	DGJMBLJC_04809	HFDHOMNF_02664	ALEPGING_00271	GEOGNNEI_03355	BINKDPLB_00631	IPPPMGOG_00231	NCHKEDON_01070	PLMPIJHD_03598	LIBHOFBA_03373	MFAGDJPO_02234	AICMNGMC_03619	JAGDPAPJ_03616	JICHJFDH_01374	AHEHGMLM_00027	PABJNMJP_04583	MAPHOHON_01841	ONDKMJBG_00504	JDGDJJKN_04300	KLMHLHPE_01785	EGICBAEE_01519	LNEFCFII_02122	NILJAHBC_01789	KCIFOFJF_01553	CJCKLIFP_01630	IABBECJM_02442	LANDOHOG_02441	LOGCBOHO_02019	DKGFALGN_02001	PNFFMGCL_02198	BJCGHIIB_01819	NHHDDJBG_01281	LBLHELLM_01505	CGJPMKCI_01809	JOHJONHN_01646	CNEDDIJH_01418	JLJGJGIB_01277
frdC		Fumarate reductase subunit C	102	102	1	1	16089				395	395	395	DGJMBLJC_00326	HFDHOMNF_04327	ALEPGING_01969	GEOGNNEI_03475	BINKDPLB_04382	IPPPMGOG_02928	NCHKEDON_04343	PLMPIJHD_03749	LIBHOFBA_03839	MFAGDJPO_03559	AICMNGMC_03749	JAGDPAPJ_03750	JICHJFDH_02703	AHEHGMLM_01806	PABJNMJP_00605	MAPHOHON_01332	ONDKMJBG_02173	JDGDJJKN_02703	KLMHLHPE_03628	EGICBAEE_02687	LNEFCFII_02578	NILJAHBC_01332	KCIFOFJF_02754	CJCKLIFP_02823	IABBECJM_02941	LANDOHOG_02939	LOGCBOHO_02551	DKGFALGN_03025	PNFFMGCL_03462	BJCGHIIB_03826	NHHDDJBG_02424	LBLHELLM_02531	CGJPMKCI_02412	JOHJONHN_04204	CNEDDIJH_01850	JLJGJGIB_01868
diaA		DnaA initiator-associating protein DiaA	102	102	1	1	13392				590	590	590	DGJMBLJC_01594	HFDHOMNF_01183	ALEPGING_01326	GEOGNNEI_01867	BINKDPLB_01262	IPPPMGOG_03554	NCHKEDON_01439	PLMPIJHD_01793	LIBHOFBA_01602	MFAGDJPO_01774	AICMNGMC_01652	JAGDPAPJ_01795	JICHJFDH_02069	AHEHGMLM_04246	PABJNMJP_02387	MAPHOHON_03315	ONDKMJBG_03457	JDGDJJKN_01114	KLMHLHPE_04086	EGICBAEE_03846	LNEFCFII_03873	NILJAHBC_03892	KCIFOFJF_03807	CJCKLIFP_03594	IABBECJM_03637	LANDOHOG_03891	LOGCBOHO_03492	DKGFALGN_03562	PNFFMGCL_03277	BJCGHIIB_03482	NHHDDJBG_03518	LBLHELLM_03426	CGJPMKCI_03512	JOHJONHN_03728	CNEDDIJH_03250	JLJGJGIB_03419
pstC		Phosphate transport system permease protein PstC	102	102	1	1	15029				959	959	959	DGJMBLJC_01754	HFDHOMNF_02082	ALEPGING_00616	GEOGNNEI_02154	BINKDPLB_02129	IPPPMGOG_03747	NCHKEDON_02612	PLMPIJHD_02196	LIBHOFBA_02004	MFAGDJPO_03951	AICMNGMC_02123	JAGDPAPJ_02196	JICHJFDH_01980	AHEHGMLM_03102	PABJNMJP_03167	MAPHOHON_04105	ONDKMJBG_03893	JDGDJJKN_04395	KLMHLHPE_04237	EGICBAEE_04132	LNEFCFII_04244	NILJAHBC_04336	KCIFOFJF_04252	CJCKLIFP_04342	IABBECJM_04382	LANDOHOG_04332	LOGCBOHO_04384	DKGFALGN_04003	PNFFMGCL_03838	BJCGHIIB_03944	NHHDDJBG_03816	LBLHELLM_03577	CGJPMKCI_03765	JOHJONHN_03994	CNEDDIJH_03685	JLJGJGIB_03570
ppk		Polyphosphate kinase	102	102	1	1	10489				2066	2066	2066	DGJMBLJC_02708	HFDHOMNF_03001	ALEPGING_01118	GEOGNNEI_02770	BINKDPLB_01898	IPPPMGOG_00844	NCHKEDON_00938	PLMPIJHD_02738	LIBHOFBA_02550	MFAGDJPO_01358	AICMNGMC_02858	JAGDPAPJ_02793	JICHJFDH_03561	AHEHGMLM_02772	PABJNMJP_04041	MAPHOHON_02374	ONDKMJBG_03171	JDGDJJKN_03061	KLMHLHPE_02262	EGICBAEE_01389	LNEFCFII_01992	NILJAHBC_02388	KCIFOFJF_03314	CJCKLIFP_01499	IABBECJM_01745	LANDOHOG_01965	LOGCBOHO_02150	DKGFALGN_02456	PNFFMGCL_01782	BJCGHIIB_01932	NHHDDJBG_01738	LBLHELLM_00993	CGJPMKCI_01939	JOHJONHN_02147	CNEDDIJH_01531	JLJGJGIB_01407
atpA		ATP synthase subunit alpha	102	102	1	1	15043				1541	1541	1541	DGJMBLJC_01741	HFDHOMNF_02069	ALEPGING_00604	GEOGNNEI_02142	BINKDPLB_02117	IPPPMGOG_03735	NCHKEDON_02624	PLMPIJHD_02184	LIBHOFBA_01992	MFAGDJPO_03963	AICMNGMC_02111	JAGDPAPJ_02184	JICHJFDH_01968	AHEHGMLM_03090	PABJNMJP_03155	MAPHOHON_04117	ONDKMJBG_03881	JDGDJJKN_04384	KLMHLHPE_04249	EGICBAEE_04144	LNEFCFII_04256	NILJAHBC_04324	KCIFOFJF_04240	CJCKLIFP_04330	IABBECJM_04394	LANDOHOG_04320	LOGCBOHO_04372	DKGFALGN_04015	PNFFMGCL_03826	BJCGHIIB_03932	NHHDDJBG_03804	LBLHELLM_03589	CGJPMKCI_03753	JOHJONHN_03982	CNEDDIJH_03673	JLJGJGIB_03582
sspA		Stringent starvation protein A	102	102	1	1	13495				638	638	638	DGJMBLJC_01512	HFDHOMNF_01263	ALEPGING_00924	GEOGNNEI_02355	BINKDPLB_02543	IPPPMGOG_00055	NCHKEDON_01246	PLMPIJHD_02983	LIBHOFBA_02795	MFAGDJPO_02764	AICMNGMC_03048	JAGDPAPJ_02983	JICHJFDH_03706	AHEHGMLM_04169	PABJNMJP_02310	MAPHOHON_03238	ONDKMJBG_04545	JDGDJJKN_01038	KLMHLHPE_04334	EGICBAEE_04401	LNEFCFII_04472	NILJAHBC_04430	KCIFOFJF_04463	CJCKLIFP_03671	IABBECJM_03714	LANDOHOG_04426	LOGCBOHO_03569	DKGFALGN_04253	PNFFMGCL_04091	BJCGHIIB_04169	NHHDDJBG_04029	LBLHELLM_04007	CGJPMKCI_04033	JOHJONHN_04360	CNEDDIJH_04325	JLJGJGIB_04135
nagD		Ribonucleotide monophosphatase NagD	102	102	1	1	4982				752	752	752	DGJMBLJC_01097	HFDHOMNF_03154	ALEPGING_00008	GEOGNNEI_04115	BINKDPLB_03870	IPPPMGOG_03160	NCHKEDON_04635	PLMPIJHD_04225	LIBHOFBA_04308	MFAGDJPO_04100	AICMNGMC_04028	JAGDPAPJ_04219	JICHJFDH_02962	AHEHGMLM_00241	PABJNMJP_02842	MAPHOHON_03678	ONDKMJBG_03696	JDGDJJKN_00774	KLMHLHPE_02799	EGICBAEE_03311	LNEFCFII_03040	NILJAHBC_03457	KCIFOFJF_03099	CJCKLIFP_03414	IABBECJM_03499	LANDOHOG_03497	LOGCBOHO_03141	DKGFALGN_02862	PNFFMGCL_03622	BJCGHIIB_02718	NHHDDJBG_03376	LBLHELLM_01627	CGJPMKCI_02642	JOHJONHN_03440	CNEDDIJH_04097	JLJGJGIB_03737
speB		Agmatinase	102	102	1	1	1689				920	920	920	DGJMBLJC_03424	HFDHOMNF_03788	ALEPGING_01576	GEOGNNEI_01561	BINKDPLB_00322	IPPPMGOG_04030	NCHKEDON_01837	PLMPIJHD_01355	LIBHOFBA_01165	MFAGDJPO_03333	AICMNGMC_01356	JAGDPAPJ_01499	JICHJFDH_01847	AHEHGMLM_03869	PABJNMJP_00130	MAPHOHON_02001	ONDKMJBG_02718	JDGDJJKN_01333	KLMHLHPE_01045	EGICBAEE_00702	LNEFCFII_01540	NILJAHBC_02185	KCIFOFJF_01686	CJCKLIFP_02328	IABBECJM_01542	LANDOHOG_01279	LOGCBOHO_01279	DKGFALGN_01304	PNFFMGCL_01362	BJCGHIIB_00839	NHHDDJBG_00322	LBLHELLM_00323	CGJPMKCI_01001	JOHJONHN_00755	CNEDDIJH_00877	JLJGJGIB_00827
hybF_2		Hydrogenase maturation factor HybF	102	102	1	1	13048				341	341	341	DGJMBLJC_03505	HFDHOMNF_03705	ALEPGING_00990	GEOGNNEI_01639	BINKDPLB_02312	IPPPMGOG_04108	NCHKEDON_01915	PLMPIJHD_01433	LIBHOFBA_01243	MFAGDJPO_03411	AICMNGMC_01434	JAGDPAPJ_01577	JICHJFDH_03026	AHEHGMLM_03791	PABJNMJP_00052	MAPHOHON_01923	ONDKMJBG_02795	JDGDJJKN_01270	KLMHLHPE_00967	EGICBAEE_00624	LNEFCFII_01618	NILJAHBC_02263	KCIFOFJF_01608	CJCKLIFP_02406	IABBECJM_01620	LANDOHOG_01201	LOGCBOHO_01201	DKGFALGN_01226	PNFFMGCL_01284	BJCGHIIB_00761	NHHDDJBG_00400	LBLHELLM_00401	CGJPMKCI_00923	JOHJONHN_00677	CNEDDIJH_00955	JLJGJGIB_04233
pntB		NAD(P) transhydrogenase subunit beta	102	102	1	1	6854				1388	1388	1388	DGJMBLJC_02635	HFDHOMNF_00469	ALEPGING_02106	GEOGNNEI_00748	BINKDPLB_02642	IPPPMGOG_01759	NCHKEDON_00391	PLMPIJHD_00605	LIBHOFBA_00417	MFAGDJPO_00607	AICMNGMC_00607	JAGDPAPJ_00751	JICHJFDH_04405	AHEHGMLM_00380	PABJNMJP_01266	MAPHOHON_00750	ONDKMJBG_01217	JDGDJJKN_00097	KLMHLHPE_00490	EGICBAEE_00352	LNEFCFII_00426	NILJAHBC_00427	KCIFOFJF_00751	CJCKLIFP_00427	IABBECJM_00751	LANDOHOG_00750	LOGCBOHO_00750	DKGFALGN_00426	PNFFMGCL_00748	BJCGHIIB_00225	NHHDDJBG_00468	LBLHELLM_00877	CGJPMKCI_00425	JOHJONHN_00526	CNEDDIJH_00278	JLJGJGIB_02040
ybiS		putative L,D-transpeptidase YbiS	102	102	1	1	5255				920	920	920	DGJMBLJC_01261	HFDHOMNF_01406	ALEPGING_03586	GEOGNNEI_04372	BINKDPLB_01515	IPPPMGOG_03472	NCHKEDON_01522	PLMPIJHD_04483	LIBHOFBA_04566	MFAGDJPO_04502	AICMNGMC_04291	JAGDPAPJ_04476	JICHJFDH_00790	AHEHGMLM_02175	PABJNMJP_01758	MAPHOHON_03501	ONDKMJBG_04314	JDGDJJKN_00631	KLMHLHPE_03392	EGICBAEE_03546	LNEFCFII_03402	NILJAHBC_03586	KCIFOFJF_03371	CJCKLIFP_03695	IABBECJM_03738	LANDOHOG_03689	LOGCBOHO_03593	DKGFALGN_03277	PNFFMGCL_03883	BJCGHIIB_04056	NHHDDJBG_03469	LBLHELLM_03728	CGJPMKCI_03913	JOHJONHN_03575	CNEDDIJH_03096	JLJGJGIB_02565
sdhB		Succinate dehydrogenase iron-sulfur subunit	102	102	1	1	5069				716	716	716	DGJMBLJC_01143	HFDHOMNF_03110	ALEPGING_00535	GEOGNNEI_04155	BINKDPLB_03910	IPPPMGOG_03200	NCHKEDON_04675	PLMPIJHD_04266	LIBHOFBA_04349	MFAGDJPO_04141	AICMNGMC_04069	JAGDPAPJ_04259	JICHJFDH_00756	AHEHGMLM_03663	PABJNMJP_02882	MAPHOHON_04475	ONDKMJBG_03656	JDGDJJKN_00733	KLMHLHPE_02759	EGICBAEE_03271	LNEFCFII_03080	NILJAHBC_03417	KCIFOFJF_03059	CJCKLIFP_03374	IABBECJM_03539	LANDOHOG_03537	LOGCBOHO_03101	DKGFALGN_02902	PNFFMGCL_04003	BJCGHIIB_02758	NHHDDJBG_03985	LBLHELLM_03830	CGJPMKCI_02602	JOHJONHN_04057	CNEDDIJH_03748	JLJGJGIB_03924
nuoE		NADH-quinone oxidoreductase subunit E	102	102	1	1	10019				500	500	500	DGJMBLJC_02315	HFDHOMNF_04628	ALEPGING_00679	GEOGNNEI_02512	BINKDPLB_00879	IPPPMGOG_00731	NCHKEDON_00688	PLMPIJHD_02488	LIBHOFBA_02299	MFAGDJPO_01108	AICMNGMC_02608	JAGDPAPJ_02543	JICHJFDH_03153	AHEHGMLM_01203	PABJNMJP_03790	MAPHOHON_02624	ONDKMJBG_02920	JDGDJJKN_02811	KLMHLHPE_03023	EGICBAEE_01140	LNEFCFII_01743	NILJAHBC_02636	KCIFOFJF_02526	CJCKLIFP_01251	IABBECJM_01993	LANDOHOG_01717	LOGCBOHO_02398	DKGFALGN_03163	PNFFMGCL_01960	BJCGHIIB_03167	NHHDDJBG_02794	LBLHELLM_02903	CGJPMKCI_03142	JOHJONHN_01975	CNEDDIJH_02503	JLJGJGIB_03203
atpG		ATP synthase gamma chain	102	102	1	1	15042				863	863	863	DGJMBLJC_01742	HFDHOMNF_02070	ALEPGING_00605	GEOGNNEI_02143	BINKDPLB_02118	IPPPMGOG_03736	NCHKEDON_02623	PLMPIJHD_02185	LIBHOFBA_01993	MFAGDJPO_03962	AICMNGMC_02112	JAGDPAPJ_02185	JICHJFDH_01969	AHEHGMLM_03091	PABJNMJP_03156	MAPHOHON_04116	ONDKMJBG_03882	JDGDJJKN_04385	KLMHLHPE_04248	EGICBAEE_04143	LNEFCFII_04255	NILJAHBC_04325	KCIFOFJF_04241	CJCKLIFP_04331	IABBECJM_04393	LANDOHOG_04321	LOGCBOHO_04373	DKGFALGN_04014	PNFFMGCL_03827	BJCGHIIB_03933	NHHDDJBG_03805	LBLHELLM_03588	CGJPMKCI_03754	JOHJONHN_03983	CNEDDIJH_03674	JLJGJGIB_03581
nrdA		Ribonucleoside-diphosphate reductase 1 subunit alpha	102	102	1	1	9946				2285	2285	2285	DGJMBLJC_02371	HFDHOMNF_04680	ALEPGING_00693	GEOGNNEI_02463	BINKDPLB_00830	IPPPMGOG_00780	NCHKEDON_00639	PLMPIJHD_02439	LIBHOFBA_02250	MFAGDJPO_01059	AICMNGMC_02559	JAGDPAPJ_02494	JICHJFDH_03103	AHEHGMLM_01154	PABJNMJP_03741	MAPHOHON_02673	ONDKMJBG_02871	JDGDJJKN_02762	KLMHLHPE_03072	EGICBAEE_01091	LNEFCFII_01694	NILJAHBC_02685	KCIFOFJF_02575	CJCKLIFP_01202	IABBECJM_02042	LANDOHOG_01668	LOGCBOHO_02447	DKGFALGN_03114	PNFFMGCL_02009	BJCGHIIB_03216	NHHDDJBG_02745	LBLHELLM_02854	CGJPMKCI_03191	JOHJONHN_02024	CNEDDIJH_04262	JLJGJGIB_03957
sdhA		Succinate dehydrogenase flavoprotein subunit	102	102	1	1	5068				1766	1766	1766	DGJMBLJC_01142	HFDHOMNF_03111	ALEPGING_00534	GEOGNNEI_04154	BINKDPLB_03909	IPPPMGOG_03199	NCHKEDON_04674	PLMPIJHD_04265	LIBHOFBA_04348	MFAGDJPO_04140	AICMNGMC_04068	JAGDPAPJ_04258	JICHJFDH_00755	AHEHGMLM_03664	PABJNMJP_02881	MAPHOHON_04474	ONDKMJBG_03657	JDGDJJKN_00734	KLMHLHPE_02760	EGICBAEE_03272	LNEFCFII_03079	NILJAHBC_03418	KCIFOFJF_03060	CJCKLIFP_03375	IABBECJM_03538	LANDOHOG_03536	LOGCBOHO_03102	DKGFALGN_02901	PNFFMGCL_04004	BJCGHIIB_02757	NHHDDJBG_03986	LBLHELLM_03829	CGJPMKCI_02603	JOHJONHN_04058	CNEDDIJH_03749	JLJGJGIB_03923
atpC		ATP synthase epsilon chain	102	102	1	1	15040				419	419	419	DGJMBLJC_01744	HFDHOMNF_02072	ALEPGING_00607	GEOGNNEI_02145	BINKDPLB_02120	IPPPMGOG_03738	NCHKEDON_02621	PLMPIJHD_02187	LIBHOFBA_01995	MFAGDJPO_03960	AICMNGMC_02114	JAGDPAPJ_02187	JICHJFDH_01971	AHEHGMLM_03093	PABJNMJP_03158	MAPHOHON_04114	ONDKMJBG_03884	JDGDJJKN_04387	KLMHLHPE_04246	EGICBAEE_04141	LNEFCFII_04253	NILJAHBC_04327	KCIFOFJF_04243	CJCKLIFP_04333	IABBECJM_04391	LANDOHOG_04323	LOGCBOHO_04375	DKGFALGN_04012	PNFFMGCL_03829	BJCGHIIB_03935	NHHDDJBG_03807	LBLHELLM_03586	CGJPMKCI_03756	JOHJONHN_03985	CNEDDIJH_03676	JLJGJGIB_03579
crp		cAMP-activated global transcriptional regulator CRP	102	102	1	1	14552				632	632	632	DGJMBLJC_01812	HFDHOMNF_03625	ALEPGING_03824	GEOGNNEI_03850	BINKDPLB_03587	IPPPMGOG_02244	NCHKEDON_01685	PLMPIJHD_01647	LIBHOFBA_01456	MFAGDJPO_01628	AICMNGMC_01506	JAGDPAPJ_01649	JICHJFDH_03415	AHEHGMLM_01982	PABJNMJP_02634	MAPHOHON_02908	ONDKMJBG_03512	JDGDJJKN_04449	KLMHLHPE_02705	EGICBAEE_03669	LNEFCFII_03666	NILJAHBC_03364	KCIFOFJF_03600	CJCKLIFP_03191	IABBECJM_03234	LANDOHOG_03232	LOGCBOHO_02918	DKGFALGN_03417	PNFFMGCL_02779	BJCGHIIB_02583	NHHDDJBG_02393	LBLHELLM_02371	CGJPMKCI_02381	JOHJONHN_03196	CNEDDIJH_03061	JLJGJGIB_01708
secE		Protein translocase subunit SecE	102	102	1	1	15652				383	383	383	DGJMBLJC_02737	HFDHOMNF_02744	ALEPGING_03679	GEOGNNEI_02897	BINKDPLB_03001	IPPPMGOG_01372	NCHKEDON_02778	PLMPIJHD_03144	LIBHOFBA_02907	MFAGDJPO_02921	AICMNGMC_03118	JAGDPAPJ_03150	JICHJFDH_03613	AHEHGMLM_03725	PABJNMJP_02722	MAPHOHON_04551	ONDKMJBG_00049	JDGDJJKN_04408	KLMHLHPE_04446	EGICBAEE_04513	LNEFCFII_04525	NILJAHBC_04542	KCIFOFJF_04542	CJCKLIFP_04540	IABBECJM_04539	LANDOHOG_04512	LOGCBOHO_04515	DKGFALGN_04413	PNFFMGCL_04270	BJCGHIIB_04278	NHHDDJBG_04243	LBLHELLM_04157	CGJPMKCI_04144	JOHJONHN_04476	CNEDDIJH_04462	JLJGJGIB_04222
prfC		Peptide chain release factor RF3	102	102	1	1	11255				1586	1589	1588	DGJMBLJC_00101	HFDHOMNF_02374	ALEPGING_00895	GEOGNNEI_03098	BINKDPLB_01221	IPPPMGOG_04363	NCHKEDON_03536	PLMPIJHD_03341	LIBHOFBA_03116	MFAGDJPO_02441	AICMNGMC_03362	JAGDPAPJ_03359	JICHJFDH_02223	AHEHGMLM_03346	PABJNMJP_04326	MAPHOHON_01584	ONDKMJBG_00247	JDGDJJKN_02483	KLMHLHPE_01528	EGICBAEE_01776	LNEFCFII_02379	NILJAHBC_01532	KCIFOFJF_01296	CJCKLIFP_01887	IABBECJM_02185	LANDOHOG_02184	LOGCBOHO_01762	DKGFALGN_01744	PNFFMGCL_02347	BJCGHIIB_02122	NHHDDJBG_01160	LBLHELLM_01207	CGJPMKCI_02112	JOHJONHN_02309	CNEDDIJH_01721	JLJGJGIB_01569
galU		UTP--glucose-1-phosphate uridylyltransferase	102	102	1	1	7436				908	908	908	DGJMBLJC_02700	HFDHOMNF_00764	ALEPGING_04463	GEOGNNEI_00470	BINKDPLB_01043	IPPPMGOG_02294	NCHKEDON_03836	PLMPIJHD_00328	LIBHOFBA_00137	MFAGDJPO_00328	AICMNGMC_00328	JAGDPAPJ_00471	JICHJFDH_00461	AHEHGMLM_00660	PABJNMJP_00987	MAPHOHON_00471	ONDKMJBG_01496	JDGDJJKN_02038	KLMHLHPE_00212	EGICBAEE_00073	LNEFCFII_00705	NILJAHBC_00706	KCIFOFJF_00472	CJCKLIFP_00706	IABBECJM_00472	LANDOHOG_00471	LOGCBOHO_00471	DKGFALGN_00705	PNFFMGCL_00470	BJCGHIIB_03858	NHHDDJBG_01890	LBLHELLM_02106	CGJPMKCI_00716	JOHJONHN_00246	CNEDDIJH_01008	JLJGJGIB_00261
dnaK_1		Chaperone protein DnaK	102	102	1	1	11174				1916	1916	1916	DGJMBLJC_00049	HFDHOMNF_02429	ALEPGING_02625	GEOGNNEI_03145	BINKDPLB_00421	IPPPMGOG_03277	NCHKEDON_03583	PLMPIJHD_03388	LIBHOFBA_03163	MFAGDJPO_02488	AICMNGMC_03409	JAGDPAPJ_03406	JICHJFDH_02176	AHEHGMLM_03299	PABJNMJP_04373	MAPHOHON_01631	ONDKMJBG_00294	JDGDJJKN_02432	KLMHLHPE_01575	EGICBAEE_01729	LNEFCFII_02332	NILJAHBC_01579	KCIFOFJF_01343	CJCKLIFP_01840	IABBECJM_02232	LANDOHOG_02231	LOGCBOHO_01809	DKGFALGN_01791	PNFFMGCL_02394	BJCGHIIB_02075	NHHDDJBG_01207	LBLHELLM_01160	CGJPMKCI_02065	JOHJONHN_02262	CNEDDIJH_01674	JLJGJGIB_01522
smpB		SsrA-binding protein	102	102	1	1	16715				527	527	527	DGJMBLJC_01430	HFDHOMNF_03341	ALEPGING_04004	GEOGNNEI_02328	BINKDPLB_03053	IPPPMGOG_01174	NCHKEDON_02666	PLMPIJHD_02919	LIBHOFBA_02731	MFAGDJPO_02700	AICMNGMC_02984	JAGDPAPJ_02919	JICHJFDH_00026	AHEHGMLM_04080	PABJNMJP_02666	MAPHOHON_02338	ONDKMJBG_04632	JDGDJJKN_01664	KLMHLHPE_01383	EGICBAEE_01041	LNEFCFII_01201	NILJAHBC_01846	KCIFOFJF_04394	CJCKLIFP_04453	IABBECJM_01204	LANDOHOG_01617	LOGCBOHO_01617	DKGFALGN_04180	PNFFMGCL_04064	BJCGHIIB_01179	NHHDDJBG_04144	LBLHELLM_03936	CGJPMKCI_04007	JOHJONHN_04334	CNEDDIJH_04222	JLJGJGIB_03872
minD		Septum site-determining protein MinD	102	102	1	1	7558				812	812	812	DGJMBLJC_03195	HFDHOMNF_00832	ALEPGING_00209	GEOGNNEI_00406	BINKDPLB_03157	IPPPMGOG_02358	NCHKEDON_03900	PLMPIJHD_00264	LIBHOFBA_00073	MFAGDJPO_00264	AICMNGMC_00264	JAGDPAPJ_00407	JICHJFDH_00398	AHEHGMLM_00724	PABJNMJP_00923	MAPHOHON_00407	ONDKMJBG_01560	JDGDJJKN_01975	KLMHLHPE_00148	EGICBAEE_00009	LNEFCFII_00769	NILJAHBC_00771	KCIFOFJF_00407	CJCKLIFP_00771	IABBECJM_00407	LANDOHOG_00406	LOGCBOHO_00406	DKGFALGN_00769	PNFFMGCL_00406	BJCGHIIB_01248	NHHDDJBG_01954	LBLHELLM_02042	CGJPMKCI_00780	JOHJONHN_00182	CNEDDIJH_01072	JLJGJGIB_00325
nfuA		Fe/S biogenesis protein NfuA	102	102	1	1	14485				575	575	575	DGJMBLJC_01861	HFDHOMNF_03574	ALEPGING_01731	GEOGNNEI_03894	BINKDPLB_03631	IPPPMGOG_04588	NCHKEDON_03313	PLMPIJHD_01691	LIBHOFBA_01500	MFAGDJPO_01672	AICMNGMC_01550	JAGDPAPJ_01693	JICHJFDH_03370	AHEHGMLM_03468	PABJNMJP_04657	MAPHOHON_02952	ONDKMJBG_03556	JDGDJJKN_03466	KLMHLHPE_02661	EGICBAEE_03625	LNEFCFII_03622	NILJAHBC_03320	KCIFOFJF_03556	CJCKLIFP_03235	IABBECJM_03278	LANDOHOG_03276	LOGCBOHO_02962	DKGFALGN_03461	PNFFMGCL_02735	BJCGHIIB_02539	NHHDDJBG_02349	LBLHELLM_02415	CGJPMKCI_02337	JOHJONHN_03152	CNEDDIJH_03017	JLJGJGIB_01752
clpP		ATP-dependent Clp protease proteolytic subunit	102	102	1	1	433				623	623	623	DGJMBLJC_04871	HFDHOMNF_01683	ALEPGING_00552	GEOGNNEI_01797	BINKDPLB_01739	IPPPMGOG_00470	NCHKEDON_03029	PLMPIJHD_01590	LIBHOFBA_01400	MFAGDJPO_01571	AICMNGMC_04648	JAGDPAPJ_04702	JICHJFDH_02628	AHEHGMLM_03606	PABJNMJP_01999	MAPHOHON_03621	ONDKMJBG_04364	JDGDJJKN_03712	KLMHLHPE_03442	EGICBAEE_02400	LNEFCFII_03452	NILJAHBC_02815	KCIFOFJF_02113	CJCKLIFP_02637	IABBECJM_02679	LANDOHOG_02577	LOGCBOHO_03748	DKGFALGN_02238	PNFFMGCL_03138	BJCGHIIB_03343	NHHDDJBG_02903	LBLHELLM_03079	CGJPMKCI_03249	JOHJONHN_02824	CNEDDIJH_02916	JLJGJGIB_02938
mraY		Phospho-N-acetylmuramoyl-pentapeptide-transferase	102	102	1	1	10935				1082	1082	1082	DGJMBLJC_04699	HFDHOMNF_02550	ALEPGING_01864	GEOGNNEI_03258	BINKDPLB_00534	IPPPMGOG_00134	NCHKEDON_01167	PLMPIJHD_03501	LIBHOFBA_03276	MFAGDJPO_02601	AICMNGMC_03522	JAGDPAPJ_03519	JICHJFDH_01471	AHEHGMLM_00124	PABJNMJP_04486	MAPHOHON_01744	ONDKMJBG_00407	JDGDJJKN_02319	KLMHLHPE_01688	EGICBAEE_01616	LNEFCFII_02219	NILJAHBC_01692	KCIFOFJF_01456	CJCKLIFP_01727	IABBECJM_02345	LANDOHOG_02344	LOGCBOHO_01922	DKGFALGN_01904	PNFFMGCL_02101	BJCGHIIB_01722	NHHDDJBG_01378	LBLHELLM_01408	CGJPMKCI_01712	JOHJONHN_01743	CNEDDIJH_01321	JLJGJGIB_01180
hda		DnaA regulatory inactivator Hda	102	102	1	1	10483				725	725	725	DGJMBLJC_02714	HFDHOMNF_03006	ALEPGING_01066	GEOGNNEI_02765	BINKDPLB_01893	IPPPMGOG_00849	NCHKEDON_00933	PLMPIJHD_02733	LIBHOFBA_02545	MFAGDJPO_01353	AICMNGMC_02853	JAGDPAPJ_02788	JICHJFDH_03566	AHEHGMLM_02777	PABJNMJP_04036	MAPHOHON_02379	ONDKMJBG_03166	JDGDJJKN_03056	KLMHLHPE_02257	EGICBAEE_01384	LNEFCFII_01987	NILJAHBC_02393	KCIFOFJF_03319	CJCKLIFP_01494	IABBECJM_01750	LANDOHOG_01960	LOGCBOHO_02155	DKGFALGN_02451	PNFFMGCL_01787	BJCGHIIB_01927	NHHDDJBG_01733	LBLHELLM_00998	CGJPMKCI_01944	JOHJONHN_02152	CNEDDIJH_01526	JLJGJGIB_01412
malG		Maltose transport system permease protein MalG	102	102	1	1	15770				890	890	890	DGJMBLJC_00572	HFDHOMNF_04196	ALEPGING_03765	GEOGNNEI_03586	BINKDPLB_01467	IPPPMGOG_03915	NCHKEDON_04232	PLMPIJHD_03860	LIBHOFBA_03950	MFAGDJPO_03670	AICMNGMC_03860	JAGDPAPJ_03861	JICHJFDH_04144	AHEHGMLM_01917	PABJNMJP_00495	MAPHOHON_01221	ONDKMJBG_02283	JDGDJJKN_03800	KLMHLHPE_03855	EGICBAEE_02797	LNEFCFII_02688	NILJAHBC_01221	KCIFOFJF_02643	CJCKLIFP_02934	IABBECJM_02829	LANDOHOG_02828	LOGCBOHO_02661	DKGFALGN_04057	PNFFMGCL_03672	BJCGHIIB_03563	NHHDDJBG_02536	LBLHELLM_02644	CGJPMKCI_02524	JOHJONHN_03261	CNEDDIJH_01961	JLJGJGIB_01979
nuoI		NADH-quinone oxidoreductase subunit I	102	102	1	1	10014				542	542	542	DGJMBLJC_02319	HFDHOMNF_04633	ALEPGING_00675	GEOGNNEI_02508	BINKDPLB_00875	IPPPMGOG_00735	NCHKEDON_00684	PLMPIJHD_02484	LIBHOFBA_02295	MFAGDJPO_01104	AICMNGMC_02604	JAGDPAPJ_02539	JICHJFDH_03149	AHEHGMLM_01199	PABJNMJP_03786	MAPHOHON_02628	ONDKMJBG_02916	JDGDJJKN_02807	KLMHLHPE_03027	EGICBAEE_01136	LNEFCFII_01739	NILJAHBC_02640	KCIFOFJF_02530	CJCKLIFP_01247	IABBECJM_01997	LANDOHOG_01713	LOGCBOHO_02402	DKGFALGN_03159	PNFFMGCL_01964	BJCGHIIB_03171	NHHDDJBG_02790	LBLHELLM_02899	CGJPMKCI_03146	JOHJONHN_01979	CNEDDIJH_02507	JLJGJGIB_03207
accB		Biotin carboxyl carrier protein of acetyl-CoA carboxylase	102	102	1	1	13530				470	473	470	DGJMBLJC_02587	HFDHOMNF_02727	ALEPGING_03037	GEOGNNEI_02412	BINKDPLB_02844	IPPPMGOG_01232	NCHKEDON_03654	PLMPIJHD_03040	LIBHOFBA_02852	MFAGDJPO_02821	AICMNGMC_01734	JAGDPAPJ_03095	JICHJFDH_02104	AHEHGMLM_04023	PABJNMJP_02929	MAPHOHON_04535	ONDKMJBG_03845	JDGDJJKN_01001	KLMHLHPE_04391	EGICBAEE_04458	LNEFCFII_04496	NILJAHBC_04487	KCIFOFJF_04487	CJCKLIFP_04485	IABBECJM_04497	LANDOHOG_04483	LOGCBOHO_04486	DKGFALGN_04310	PNFFMGCL_04184	BJCGHIIB_04222	NHHDDJBG_04183	LBLHELLM_04145	CGJPMKCI_04089	JOHJONHN_04430	CNEDDIJH_04416	JLJGJGIB_04007
nuoF		NADH-quinone oxidoreductase subunit F	102	102	1	1	10018				1337	1337	1337	DGJMBLJC_02316	HFDHOMNF_04629	ALEPGING_00678	GEOGNNEI_02511	BINKDPLB_00878	IPPPMGOG_00732	NCHKEDON_00687	PLMPIJHD_02487	LIBHOFBA_02298	MFAGDJPO_01107	AICMNGMC_02607	JAGDPAPJ_02542	JICHJFDH_03152	AHEHGMLM_01202	PABJNMJP_03789	MAPHOHON_02625	ONDKMJBG_02919	JDGDJJKN_02810	KLMHLHPE_03024	EGICBAEE_01139	LNEFCFII_01742	NILJAHBC_02637	KCIFOFJF_02527	CJCKLIFP_01250	IABBECJM_01994	LANDOHOG_01716	LOGCBOHO_02399	DKGFALGN_03162	PNFFMGCL_01961	BJCGHIIB_03168	NHHDDJBG_02793	LBLHELLM_02902	CGJPMKCI_03143	JOHJONHN_01976	CNEDDIJH_02504	JLJGJGIB_03204
erpA		Iron-sulfur cluster insertion protein ErpA	102	102	1	1	10782				344	344	344	DGJMBLJC_04793	HFDHOMNF_02650	ALEPGING_00285	GEOGNNEI_03341	BINKDPLB_00617	IPPPMGOG_00217	NCHKEDON_01084	PLMPIJHD_03584	LIBHOFBA_03359	MFAGDJPO_02220	AICMNGMC_03605	JAGDPAPJ_03602	JICHJFDH_01388	AHEHGMLM_00041	PABJNMJP_04569	MAPHOHON_01827	ONDKMJBG_00490	JDGDJJKN_04314	KLMHLHPE_01771	EGICBAEE_01533	LNEFCFII_02136	NILJAHBC_01775	KCIFOFJF_01539	CJCKLIFP_01644	IABBECJM_02428	LANDOHOG_02427	LOGCBOHO_02005	DKGFALGN_01987	PNFFMGCL_02184	BJCGHIIB_01805	NHHDDJBG_01295	LBLHELLM_01491	CGJPMKCI_01795	JOHJONHN_01660	CNEDDIJH_01404	JLJGJGIB_01263
soxS		Regulatory protein SoxS	102	102	1	1	15893				323	323	323	DGJMBLJC_00519	HFDHOMNF_04246	ALEPGING_01462	GEOGNNEI_03549	BINKDPLB_04457	IPPPMGOG_03002	NCHKEDON_04268	PLMPIJHD_03824	LIBHOFBA_03914	MFAGDJPO_03634	AICMNGMC_03823	JAGDPAPJ_03825	JICHJFDH_04107	AHEHGMLM_01881	PABJNMJP_00531	MAPHOHON_01258	ONDKMJBG_02247	JDGDJJKN_03837	KLMHLHPE_03892	EGICBAEE_02761	LNEFCFII_02652	NILJAHBC_01257	KCIFOFJF_02680	CJCKLIFP_02898	IABBECJM_02866	LANDOHOG_02864	LOGCBOHO_02625	DKGFALGN_02951	PNFFMGCL_03709	BJCGHIIB_03526	NHHDDJBG_02499	LBLHELLM_02607	CGJPMKCI_02487	JOHJONHN_03298	CNEDDIJH_01925	JLJGJGIB_01942
corA		Magnesium transport protein CorA	102	102	1	1	15293				950	950	950	DGJMBLJC_01675	HFDHOMNF_01992	ALEPGING_00094	GEOGNNEI_02086	BINKDPLB_02528	IPPPMGOG_01283	NCHKEDON_04461	PLMPIJHD_02128	LIBHOFBA_01936	MFAGDJPO_01995	AICMNGMC_01969	JAGDPAPJ_02128	JICHJFDH_03823	AHEHGMLM_02346	PABJNMJP_00726	MAPHOHON_04021	ONDKMJBG_02017	JDGDJJKN_04184	KLMHLHPE_04172	EGICBAEE_04067	LNEFCFII_04162	NILJAHBC_04179	KCIFOFJF_04093	CJCKLIFP_04185	IABBECJM_04245	LANDOHOG_04192	LOGCBOHO_04243	DKGFALGN_03783	PNFFMGCL_03770	BJCGHIIB_03642	NHHDDJBG_03634	LBLHELLM_03512	CGJPMKCI_03612	JOHJONHN_03910	CNEDDIJH_03536	JLJGJGIB_03504
rlmE		Ribosomal RNA large subunit methyltransferase E	102	102	1	1	13434				626	626	626	DGJMBLJC_01560	HFDHOMNF_01215	ALEPGING_01355	GEOGNNEI_01838	BINKDPLB_03547	IPPPMGOG_03583	NCHKEDON_01409	PLMPIJHD_01763	LIBHOFBA_01572	MFAGDJPO_01744	AICMNGMC_01622	JAGDPAPJ_01765	JICHJFDH_03905	AHEHGMLM_04217	PABJNMJP_02358	MAPHOHON_03286	ONDKMJBG_03486	JDGDJJKN_01084	KLMHLHPE_04115	EGICBAEE_03816	LNEFCFII_03903	NILJAHBC_03921	KCIFOFJF_03836	CJCKLIFP_03623	IABBECJM_03666	LANDOHOG_03920	LOGCBOHO_03521	DKGFALGN_03533	PNFFMGCL_03248	BJCGHIIB_03511	NHHDDJBG_03489	LBLHELLM_03455	CGJPMKCI_03483	JOHJONHN_03757	CNEDDIJH_03279	JLJGJGIB_03448
fliM		Flagellar motor switch protein FliM	102	102	1	1	9098				1004	1004	1004	DGJMBLJC_03023	HFDHOMNF_00994	ALEPGING_04031	GEOGNNEI_00249	BINKDPLB_03313	IPPPMGOG_02514	NCHKEDON_04056	PLMPIJHD_00107	LIBHOFBA_03506	MFAGDJPO_00107	AICMNGMC_00107	JAGDPAPJ_00250	JICHJFDH_02249	AHEHGMLM_00881	PABJNMJP_03229	MAPHOHON_00250	ONDKMJBG_01716	JDGDJJKN_01820	KLMHLHPE_01893	EGICBAEE_02146	LNEFCFII_00925	NILJAHBC_00927	KCIFOFJF_00250	CJCKLIFP_00927	IABBECJM_00250	LANDOHOG_00249	LOGCBOHO_00249	DKGFALGN_00925	PNFFMGCL_00249	BJCGHIIB_01404	NHHDDJBG_01012	LBLHELLM_03344	CGJPMKCI_01394	JOHJONHN_00025	CNEDDIJH_01227	JLJGJGIB_00481
flgG		Flagellar basal-body rod protein FlgG	102	102	1	1	5902				782	782	782	DGJMBLJC_03959	HFDHOMNF_00145	ALEPGING_02207	GEOGNNEI_01047	BINKDPLB_04251	IPPPMGOG_02058	NCHKEDON_00092	PLMPIJHD_00904	LIBHOFBA_00716	MFAGDJPO_00906	AICMNGMC_00907	JAGDPAPJ_01050	JICHJFDH_01258	AHEHGMLM_01598	PABJNMJP_01565	MAPHOHON_01049	ONDKMJBG_00918	JDGDJJKN_00393	KLMHLHPE_00789	EGICBAEE_02920	LNEFCFII_00127	NILJAHBC_00127	KCIFOFJF_01051	CJCKLIFP_00127	IABBECJM_01051	LANDOHOG_01050	LOGCBOHO_01050	DKGFALGN_00127	PNFFMGCL_01107	BJCGHIIB_00584	NHHDDJBG_03013	LBLHELLM_00578	CGJPMKCI_00126	JOHJONHN_01203	CNEDDIJH_02554	JLJGJGIB_02706
fbp		Fructose-1,6-bisphosphatase class 1	102	102	1	1	16195				998	998	998	DGJMBLJC_00249	HFDHOMNF_02126	ALEPGING_00340	GEOGNNEI_03401	BINKDPLB_04308	IPPPMGOG_02854	NCHKEDON_04417	PLMPIJHD_03675	LIBHOFBA_03765	MFAGDJPO_03485	AICMNGMC_03675	JAGDPAPJ_03676	JICHJFDH_02777	AHEHGMLM_01732	PABJNMJP_00679	MAPHOHON_01406	ONDKMJBG_02099	JDGDJJKN_02630	KLMHLHPE_03554	EGICBAEE_02613	LNEFCFII_02504	NILJAHBC_01406	KCIFOFJF_02828	CJCKLIFP_02749	IABBECJM_03015	LANDOHOG_03013	LOGCBOHO_02477	DKGFALGN_03099	PNFFMGCL_03388	BJCGHIIB_03981	NHHDDJBG_03853	LBLHELLM_03671	CGJPMKCI_03802	JOHJONHN_04098	CNEDDIJH_03921	JLJGJGIB_03665
ppsR		Phosphoenolpyruvate synthase regulatory protein	102	102	1	1	6218				833	833	833	DGJMBLJC_03771	HFDHOMNF_00325	ALEPGING_01250	GEOGNNEI_00880	BINKDPLB_03075	IPPPMGOG_01891	NCHKEDON_00259	PLMPIJHD_00737	LIBHOFBA_00549	MFAGDJPO_00739	AICMNGMC_00740	JAGDPAPJ_00883	JICHJFDH_04273	AHEHGMLM_02958	PABJNMJP_01398	MAPHOHON_00882	ONDKMJBG_01085	JDGDJJKN_00228	KLMHLHPE_00622	EGICBAEE_00484	LNEFCFII_00294	NILJAHBC_00295	KCIFOFJF_00883	CJCKLIFP_00295	IABBECJM_00883	LANDOHOG_00882	LOGCBOHO_00882	DKGFALGN_00294	PNFFMGCL_00880	BJCGHIIB_00357	NHHDDJBG_00600	LBLHELLM_00745	CGJPMKCI_00293	JOHJONHN_01370	CNEDDIJH_00146	JLJGJGIB_02172
thiC		Phosphomethylpyrimidine synthase	102	102	1	1	15685				1127	1895	1887	DGJMBLJC_02756	HFDHOMNF_02762	ALEPGING_01156	GEOGNNEI_02882	BINKDPLB_02986	IPPPMGOG_01357	NCHKEDON_02763	PLMPIJHD_03129	LIBHOFBA_02892	MFAGDJPO_02906	AICMNGMC_03103	JAGDPAPJ_03135	JICHJFDH_03598	AHEHGMLM_03710	PABJNMJP_02707	MAPHOHON_04566	ONDKMJBG_00064	JDGDJJKN_04424	KLMHLHPE_04431	EGICBAEE_04498	LNEFCFII_04540	NILJAHBC_04527	KCIFOFJF_04527	CJCKLIFP_04525	IABBECJM_04524	LANDOHOG_04527	LOGCBOHO_04530	DKGFALGN_04428	PNFFMGCL_04255	BJCGHIIB_04263	NHHDDJBG_04258	LBLHELLM_04172	CGJPMKCI_04129	JOHJONHN_04491	CNEDDIJH_04477	JLJGJGIB_04207
group_18584		hypothetical protein	102	102	1	1	1855				713	713	713	DGJMBLJC_03342	HFDHOMNF_03880	ALEPGING_03264	GEOGNNEI_01478	BINKDPLB_00239	IPPPMGOG_03323	NCHKEDON_01754	PLMPIJHD_01272	LIBHOFBA_01082	MFAGDJPO_03250	AICMNGMC_01273	JAGDPAPJ_01416	JICHJFDH_01930	AHEHGMLM_03952	PABJNMJP_00213	MAPHOHON_02084	ONDKMJBG_00773	JDGDJJKN_01404	KLMHLHPE_01128	EGICBAEE_00785	LNEFCFII_01457	NILJAHBC_02101	KCIFOFJF_01770	CJCKLIFP_02244	IABBECJM_01458	LANDOHOG_01363	LOGCBOHO_01363	DKGFALGN_01387	PNFFMGCL_01445	BJCGHIIB_00922	NHHDDJBG_00239	LBLHELLM_00240	CGJPMKCI_01084	JOHJONHN_00838	CNEDDIJH_00794	JLJGJGIB_00744
pgsA		CDP-diacylglycerol--glycerol-3-phosphate 3-phosphatidyltransferase	102	102	1	1	9033				548	548	548	DGJMBLJC_03056	HFDHOMNF_00963	ALEPGING_00830	GEOGNNEI_00278	BINKDPLB_03284	IPPPMGOG_02485	NCHKEDON_04027	PLMPIJHD_00136	LIBHOFBA_03477	MFAGDJPO_00136	AICMNGMC_00136	JAGDPAPJ_00279	JICHJFDH_02278	AHEHGMLM_00852	PABJNMJP_00795	MAPHOHON_00279	ONDKMJBG_01687	JDGDJJKN_01849	KLMHLHPE_01864	EGICBAEE_02175	LNEFCFII_00896	NILJAHBC_00898	KCIFOFJF_00279	CJCKLIFP_00898	IABBECJM_00279	LANDOHOG_00278	LOGCBOHO_00278	DKGFALGN_00896	PNFFMGCL_00278	BJCGHIIB_01375	NHHDDJBG_03681	LBLHELLM_03859	CGJPMKCI_01365	JOHJONHN_00054	CNEDDIJH_01198	JLJGJGIB_00452
glyQ		Glycine--tRNA ligase alpha subunit	102	102	1	1	14213				911	911	911	DGJMBLJC_02016	HFDHOMNF_03985	ALEPGING_02035	GEOGNNEI_03667	BINKDPLB_03966	IPPPMGOG_02810	NCHKEDON_02418	PLMPIJHD_03947	LIBHOFBA_04032	MFAGDJPO_03757	AICMNGMC_02373	JAGDPAPJ_03946	JICHJFDH_01089	AHEHGMLM_01511	PABJNMJP_03661	MAPHOHON_02851	ONDKMJBG_04038	JDGDJJKN_03320	KLMHLHPE_02518	EGICBAEE_03083	LNEFCFII_02888	NILJAHBC_03177	KCIFOFJF_02871	CJCKLIFP_03134	IABBECJM_03177	LANDOHOG_03175	LOGCBOHO_02861	DKGFALGN_02592	PNFFMGCL_02593	BJCGHIIB_02397	NHHDDJBG_02207	LBLHELLM_02195	CGJPMKCI_02912	JOHJONHN_02583	CNEDDIJH_02304	JLJGJGIB_02514
group_18587		hypothetical protein	102	102	1	1	16075				353	353	353	DGJMBLJC_00335	HFDHOMNF_04318	ALEPGING_01960	GEOGNNEI_03483	BINKDPLB_04390	IPPPMGOG_02936	NCHKEDON_04335	PLMPIJHD_03757	LIBHOFBA_03847	MFAGDJPO_03567	AICMNGMC_03757	JAGDPAPJ_03758	JICHJFDH_02694	AHEHGMLM_01814	PABJNMJP_00597	MAPHOHON_01324	ONDKMJBG_02181	JDGDJJKN_02711	KLMHLHPE_03636	EGICBAEE_02695	LNEFCFII_02586	NILJAHBC_01324	KCIFOFJF_02746	CJCKLIFP_02831	IABBECJM_02933	LANDOHOG_02931	LOGCBOHO_02559	DKGFALGN_03017	PNFFMGCL_03471	BJCGHIIB_03818	NHHDDJBG_02433	LBLHELLM_02540	CGJPMKCI_02421	JOHJONHN_04196	CNEDDIJH_01858	JLJGJGIB_01876
frdD		Fumarate reductase subunit D	102	102	1	1	16088				359	359	359	DGJMBLJC_00327	HFDHOMNF_04326	ALEPGING_01968	GEOGNNEI_03476	BINKDPLB_04383	IPPPMGOG_02929	NCHKEDON_04342	PLMPIJHD_03750	LIBHOFBA_03840	MFAGDJPO_03560	AICMNGMC_03750	JAGDPAPJ_03751	JICHJFDH_02702	AHEHGMLM_01807	PABJNMJP_00604	MAPHOHON_01331	ONDKMJBG_02174	JDGDJJKN_02704	KLMHLHPE_03629	EGICBAEE_02688	LNEFCFII_02579	NILJAHBC_01331	KCIFOFJF_02753	CJCKLIFP_02824	IABBECJM_02940	LANDOHOG_02938	LOGCBOHO_02552	DKGFALGN_03024	PNFFMGCL_03463	BJCGHIIB_03825	NHHDDJBG_02425	LBLHELLM_02532	CGJPMKCI_02413	JOHJONHN_04203	CNEDDIJH_01851	JLJGJGIB_01869
srlD		Sorbitol-6-phosphate 2-dehydrogenase	102	102	1	1	2161				779	779	779	DGJMBLJC_01294	HFDHOMNF_03438	ALEPGING_02314	GEOGNNEI_01306	BINKDPLB_00067	IPPPMGOG_01090	NCHKEDON_01390	PLMPIJHD_01100	LIBHOFBA_00910	MFAGDJPO_03078	AICMNGMC_01101	JAGDPAPJ_01244	JICHJFDH_00110	AHEHGMLM_02657	PABJNMJP_00384	MAPHOHON_02255	ONDKMJBG_00601	JDGDJJKN_01584	KLMHLHPE_01300	EGICBAEE_00956	LNEFCFII_01284	NILJAHBC_01929	KCIFOFJF_01942	CJCKLIFP_02072	IABBECJM_01287	LANDOHOG_01534	LOGCBOHO_01534	DKGFALGN_01559	PNFFMGCL_01616	BJCGHIIB_01094	NHHDDJBG_00067	LBLHELLM_00068	CGJPMKCI_01256	JOHJONHN_01010	CNEDDIJH_00622	JLJGJGIB_00572
nuoK		NADH-quinone oxidoreductase subunit K	102	102	1	1	10012				302	302	302	DGJMBLJC_02321	HFDHOMNF_04635	ALEPGING_00673	GEOGNNEI_02506	BINKDPLB_00873	IPPPMGOG_00737	NCHKEDON_00682	PLMPIJHD_02482	LIBHOFBA_02293	MFAGDJPO_01102	AICMNGMC_02602	JAGDPAPJ_02537	JICHJFDH_03147	AHEHGMLM_01197	PABJNMJP_03784	MAPHOHON_02630	ONDKMJBG_02914	JDGDJJKN_02805	KLMHLHPE_03029	EGICBAEE_01134	LNEFCFII_01737	NILJAHBC_02642	KCIFOFJF_02532	CJCKLIFP_01245	IABBECJM_01999	LANDOHOG_01711	LOGCBOHO_02404	DKGFALGN_03157	PNFFMGCL_01966	BJCGHIIB_03173	NHHDDJBG_02788	LBLHELLM_02897	CGJPMKCI_03148	JOHJONHN_01981	CNEDDIJH_02509	JLJGJGIB_03209
ahpC_1		Alkyl hydroperoxide reductase C	102	102	1	1	499				602	602	602	DGJMBLJC_04922	HFDHOMNF_04349	ALEPGING_03180	GEOGNNEI_04347	BINKDPLB_02882	IPPPMGOG_00423	NCHKEDON_03133	PLMPIJHD_04458	LIBHOFBA_04541	MFAGDJPO_04333	AICMNGMC_04266	JAGDPAPJ_04451	JICHJFDH_03458	AHEHGMLM_03149	PABJNMJP_02195	MAPHOHON_03069	ONDKMJBG_02493	JDGDJJKN_03666	KLMHLHPE_03262	EGICBAEE_02447	LNEFCFII_03272	NILJAHBC_02862	KCIFOFJF_02160	CJCKLIFP_02590	IABBECJM_02632	LANDOHOG_02624	LOGCBOHO_03267	DKGFALGN_02191	PNFFMGCL_02810	BJCGHIIB_02801	NHHDDJBG_02591	LBLHELLM_02820	CGJPMKCI_03062	JOHJONHN_02630	CNEDDIJH_02164	JLJGJGIB_02226
grxD		Glutaredoxin 4	102	102	1	1	6741				347	347	347	DGJMBLJC_04599	HFDHOMNF_00420	ALEPGING_04154	GEOGNNEI_00795	BINKDPLB_02026	IPPPMGOG_01806	NCHKEDON_00344	PLMPIJHD_00652	LIBHOFBA_00464	MFAGDJPO_00654	AICMNGMC_00655	JAGDPAPJ_00798	JICHJFDH_04358	AHEHGMLM_03044	PABJNMJP_01313	MAPHOHON_00797	ONDKMJBG_01170	JDGDJJKN_00143	KLMHLHPE_00537	EGICBAEE_00399	LNEFCFII_00379	NILJAHBC_00380	KCIFOFJF_00798	CJCKLIFP_00380	IABBECJM_00798	LANDOHOG_00797	LOGCBOHO_00797	DKGFALGN_00379	PNFFMGCL_00795	BJCGHIIB_00272	NHHDDJBG_00515	LBLHELLM_00830	CGJPMKCI_00378	JOHJONHN_00573	CNEDDIJH_00231	JLJGJGIB_02087
zapA		Cell division protein ZapA	102	102	1	1	1726				329	329	329	DGJMBLJC_03406	HFDHOMNF_03807	ALEPGING_01594	GEOGNNEI_01543	BINKDPLB_00304	IPPPMGOG_04012	NCHKEDON_01819	PLMPIJHD_01337	LIBHOFBA_01147	MFAGDJPO_03315	AICMNGMC_01338	JAGDPAPJ_01481	JICHJFDH_01865	AHEHGMLM_03887	PABJNMJP_00148	MAPHOHON_02019	ONDKMJBG_02700	JDGDJJKN_01351	KLMHLHPE_01063	EGICBAEE_00720	LNEFCFII_01522	NILJAHBC_02166	KCIFOFJF_01705	CJCKLIFP_02309	IABBECJM_01523	LANDOHOG_01298	LOGCBOHO_01298	DKGFALGN_01322	PNFFMGCL_01380	BJCGHIIB_00857	NHHDDJBG_00304	LBLHELLM_00305	CGJPMKCI_01019	JOHJONHN_00773	CNEDDIJH_00859	JLJGJGIB_00809
ruvB		Holliday junction ATP-dependent DNA helicase RuvB	102	102	1	1	8929				1010	1010	1010	DGJMBLJC_03114	HFDHOMNF_00910	ALEPGING_04271	GEOGNNEI_00328	BINKDPLB_03234	IPPPMGOG_02435	NCHKEDON_03977	PLMPIJHD_00186	LIBHOFBA_03427	MFAGDJPO_00186	AICMNGMC_00186	JAGDPAPJ_00329	JICHJFDH_00320	AHEHGMLM_00802	PABJNMJP_00845	MAPHOHON_00329	ONDKMJBG_01637	JDGDJJKN_01899	KLMHLHPE_00070	EGICBAEE_02225	LNEFCFII_00846	NILJAHBC_00848	KCIFOFJF_00329	CJCKLIFP_00848	IABBECJM_00329	LANDOHOG_00328	LOGCBOHO_00328	DKGFALGN_00846	PNFFMGCL_00328	BJCGHIIB_01325	NHHDDJBG_02031	LBLHELLM_01964	CGJPMKCI_00857	JOHJONHN_00104	CNEDDIJH_01148	JLJGJGIB_00402
fldA		Flavodoxin 1	102	102	1	1	5000				530	530	530	DGJMBLJC_01112	HFDHOMNF_03138	ALEPGING_04298	GEOGNNEI_04128	BINKDPLB_03883	IPPPMGOG_03173	NCHKEDON_04648	PLMPIJHD_04238	LIBHOFBA_04321	MFAGDJPO_04113	AICMNGMC_04041	JAGDPAPJ_04232	JICHJFDH_00729	AHEHGMLM_03690	PABJNMJP_02855	MAPHOHON_03665	ONDKMJBG_03683	JDGDJJKN_00761	KLMHLHPE_02786	EGICBAEE_03298	LNEFCFII_03053	NILJAHBC_03444	KCIFOFJF_03086	CJCKLIFP_03401	IABBECJM_03512	LANDOHOG_03510	LOGCBOHO_03128	DKGFALGN_02875	PNFFMGCL_04030	BJCGHIIB_02731	NHHDDJBG_04012	LBLHELLM_03803	CGJPMKCI_02629	JOHJONHN_04084	CNEDDIJH_03775	JLJGJGIB_03897
pta		Phosphate acetyltransferase	102	102	1	1	10037				2141	2144	2143	DGJMBLJC_02301	HFDHOMNF_04615	ALEPGING_00699	GEOGNNEI_02524	BINKDPLB_00891	IPPPMGOG_00719	NCHKEDON_00700	PLMPIJHD_02500	LIBHOFBA_02311	MFAGDJPO_01120	AICMNGMC_02620	JAGDPAPJ_02555	JICHJFDH_03165	AHEHGMLM_01216	PABJNMJP_03803	MAPHOHON_02611	ONDKMJBG_02933	JDGDJJKN_02823	KLMHLHPE_03011	EGICBAEE_01152	LNEFCFII_01755	NILJAHBC_02624	KCIFOFJF_02514	CJCKLIFP_01263	IABBECJM_01981	LANDOHOG_01729	LOGCBOHO_02386	DKGFALGN_03175	PNFFMGCL_01948	BJCGHIIB_03155	NHHDDJBG_02806	LBLHELLM_02915	CGJPMKCI_03130	JOHJONHN_01963	CNEDDIJH_02491	JLJGJGIB_03191
livH		High-affinity branched-chain amino acid transport system permease protein LivH	102	102	1	1	14398				926	926	926	DGJMBLJC_01918	HFDHOMNF_01928	ALEPGING_01500	GEOGNNEI_03939	BINKDPLB_03676	IPPPMGOG_04543	NCHKEDON_03358	PLMPIJHD_01736	LIBHOFBA_01545	MFAGDJPO_01717	AICMNGMC_01595	JAGDPAPJ_01738	JICHJFDH_03325	AHEHGMLM_03423	PABJNMJP_04702	MAPHOHON_02997	ONDKMJBG_03601	JDGDJJKN_03417	KLMHLHPE_02616	EGICBAEE_03581	LNEFCFII_03578	NILJAHBC_03275	KCIFOFJF_03511	CJCKLIFP_03280	IABBECJM_03323	LANDOHOG_03321	LOGCBOHO_03007	DKGFALGN_03506	PNFFMGCL_02690	BJCGHIIB_02494	NHHDDJBG_02304	LBLHELLM_02460	CGJPMKCI_02292	JOHJONHN_03107	CNEDDIJH_02973	JLJGJGIB_01797
nuoB		NADH-quinone oxidoreductase subunit B	102	102	1	1	10021				662	662	662	DGJMBLJC_02313	HFDHOMNF_04626	ALEPGING_00681	GEOGNNEI_02514	BINKDPLB_00881	IPPPMGOG_00729	NCHKEDON_00690	PLMPIJHD_02490	LIBHOFBA_02301	MFAGDJPO_01110	AICMNGMC_02610	JAGDPAPJ_02545	JICHJFDH_03155	AHEHGMLM_01205	PABJNMJP_03792	MAPHOHON_02622	ONDKMJBG_02922	JDGDJJKN_02813	KLMHLHPE_03021	EGICBAEE_01142	LNEFCFII_01745	NILJAHBC_02634	KCIFOFJF_02524	CJCKLIFP_01253	IABBECJM_01991	LANDOHOG_01719	LOGCBOHO_02396	DKGFALGN_03165	PNFFMGCL_01958	BJCGHIIB_03165	NHHDDJBG_02796	LBLHELLM_02905	CGJPMKCI_03140	JOHJONHN_01973	CNEDDIJH_02501	JLJGJGIB_03201
yeiP		Elongation factor P-like protein	102	102	1	1	9763				572	572	572	DGJMBLJC_03690	HFDHOMNF_01541	ALEPGING_02580	GEOGNNEI_00024	BINKDPLB_00781	IPPPMGOG_01507	NCHKEDON_02274	PLMPIJHD_04710	LIBHOFBA_03731	MFAGDJPO_04463	AICMNGMC_04519	JAGDPAPJ_00025	JICHJFDH_01745	AHEHGMLM_01106	PABJNMJP_03454	MAPHOHON_00025	ONDKMJBG_01941	JDGDJJKN_04101	KLMHLHPE_02118	EGICBAEE_01920	LNEFCFII_01150	NILJAHBC_01152	KCIFOFJF_00025	CJCKLIFP_01152	IABBECJM_00025	LANDOHOG_00024	LOGCBOHO_00024	DKGFALGN_01150	PNFFMGCL_00024	BJCGHIIB_01629	NHHDDJBG_00787	LBLHELLM_03977	CGJPMKCI_01619	JOHJONHN_01426	CNEDDIJH_02787	JLJGJGIB_00920
ybaB		Nucleoid-associated protein YbaB	102	102	1	1	373				329	329	329	DGJMBLJC_00759	HFDHOMNF_01642	ALEPGING_02664	GEOGNNEI_01759	BINKDPLB_01702	IPPPMGOG_00508	NCHKEDON_02992	PLMPIJHD_01553	LIBHOFBA_01363	MFAGDJPO_01534	AICMNGMC_04611	JAGDPAPJ_04664	JICHJFDH_00238	AHEHGMLM_03569	PABJNMJP_01962	MAPHOHON_03584	ONDKMJBG_04401	JDGDJJKN_03747	KLMHLHPE_03480	EGICBAEE_02363	LNEFCFII_03489	NILJAHBC_02778	KCIFOFJF_02077	CJCKLIFP_02674	IABBECJM_02716	LANDOHOG_02540	LOGCBOHO_03785	DKGFALGN_02275	PNFFMGCL_03175	BJCGHIIB_03306	NHHDDJBG_02941	LBLHELLM_03041	CGJPMKCI_03287	JOHJONHN_02861	CNEDDIJH_02879	JLJGJGIB_02901
dksA		RNA polymerase-binding transcription factor DksA	102	102	1	1	10807				455	455	455	DGJMBLJC_04770	HFDHOMNF_02626	ALEPGING_02680	GEOGNNEI_03322	BINKDPLB_00598	IPPPMGOG_00198	NCHKEDON_01103	PLMPIJHD_03565	LIBHOFBA_03340	MFAGDJPO_02665	AICMNGMC_03586	JAGDPAPJ_03583	JICHJFDH_01407	AHEHGMLM_00060	PABJNMJP_04550	MAPHOHON_01808	ONDKMJBG_00471	JDGDJJKN_02244	KLMHLHPE_01752	EGICBAEE_01552	LNEFCFII_02155	NILJAHBC_01756	KCIFOFJF_01520	CJCKLIFP_01663	IABBECJM_02409	LANDOHOG_02408	LOGCBOHO_01986	DKGFALGN_01968	PNFFMGCL_02165	BJCGHIIB_01786	NHHDDJBG_01314	LBLHELLM_01472	CGJPMKCI_01776	JOHJONHN_01679	CNEDDIJH_01385	JLJGJGIB_01244
group_18602		hypothetical protein	102	102	1	1	14067				617	617	617	DGJMBLJC_02106	HFDHOMNF_04074	ALEPGING_03135	GEOGNNEI_03752	BINKDPLB_04051	IPPPMGOG_02725	NCHKEDON_02503	PLMPIJHD_04032	LIBHOFBA_04117	MFAGDJPO_03842	AICMNGMC_02458	JAGDPAPJ_04032	JICHJFDH_01004	AHEHGMLM_01426	PABJNMJP_03576	MAPHOHON_02766	ONDKMJBG_04123	JDGDJJKN_03240	KLMHLHPE_02432	EGICBAEE_03168	LNEFCFII_02803	NILJAHBC_03092	KCIFOFJF_02956	CJCKLIFP_03049	IABBECJM_03092	LANDOHOG_03090	LOGCBOHO_02776	DKGFALGN_02677	PNFFMGCL_02508	BJCGHIIB_02312	NHHDDJBG_02122	LBLHELLM_02280	CGJPMKCI_02827	JOHJONHN_02498	CNEDDIJH_02219	JLJGJGIB_02429
kup		Low affinity potassium transport system protein kup	102	102	1	1	15061				1868	1868	1868	DGJMBLJC_01723	HFDHOMNF_02055	ALEPGING_00591	GEOGNNEI_02129	BINKDPLB_02104	IPPPMGOG_03722	NCHKEDON_02637	PLMPIJHD_02171	LIBHOFBA_01979	MFAGDJPO_03976	AICMNGMC_02098	JAGDPAPJ_02171	JICHJFDH_01955	AHEHGMLM_03077	PABJNMJP_03142	MAPHOHON_04130	ONDKMJBG_03868	JDGDJJKN_04371	KLMHLHPE_04262	EGICBAEE_04157	LNEFCFII_04269	NILJAHBC_04311	KCIFOFJF_04227	CJCKLIFP_04317	IABBECJM_04407	LANDOHOG_04307	LOGCBOHO_04359	DKGFALGN_04028	PNFFMGCL_03813	BJCGHIIB_03919	NHHDDJBG_03791	LBLHELLM_03602	CGJPMKCI_03740	JOHJONHN_03969	CNEDDIJH_03660	JLJGJGIB_03595
grcA		Autonomous glycyl radical cofactor	102	102	1	1	10697				383	383	383	DGJMBLJC_01029	HFDHOMNF_02897	ALEPGING_03910	GEOGNNEI_02860	BINKDPLB_01988	IPPPMGOG_01469	NCHKEDON_01028	PLMPIJHD_02828	LIBHOFBA_02640	MFAGDJPO_01448	AICMNGMC_02948	JAGDPAPJ_02883	JICHJFDH_03470	AHEHGMLM_02078	PABJNMJP_04131	MAPHOHON_03802	ONDKMJBG_03263	JDGDJJKN_03158	KLMHLHPE_02352	EGICBAEE_01479	LNEFCFII_02082	NILJAHBC_02297	KCIFOFJF_03223	CJCKLIFP_01590	IABBECJM_01654	LANDOHOG_02056	LOGCBOHO_02059	DKGFALGN_02546	PNFFMGCL_01692	BJCGHIIB_02022	NHHDDJBG_01828	LBLHELLM_00903	CGJPMKCI_01849	JOHJONHN_02057	CNEDDIJH_01621	JLJGJGIB_01317
prfA		Peptide chain release factor RF1	102	102	1	1	7475				1082	1082	1082	DGJMBLJC_02671	HFDHOMNF_00789	ALEPGING_04485	GEOGNNEI_00447	BINKDPLB_01066	IPPPMGOG_02317	NCHKEDON_03859	PLMPIJHD_00305	LIBHOFBA_00114	MFAGDJPO_00305	AICMNGMC_00305	JAGDPAPJ_00448	JICHJFDH_00439	AHEHGMLM_00683	PABJNMJP_00964	MAPHOHON_00448	ONDKMJBG_01519	JDGDJJKN_02015	KLMHLHPE_00189	EGICBAEE_00050	LNEFCFII_00728	NILJAHBC_00730	KCIFOFJF_00448	CJCKLIFP_00730	IABBECJM_00448	LANDOHOG_00447	LOGCBOHO_00447	DKGFALGN_00728	PNFFMGCL_00447	BJCGHIIB_01207	NHHDDJBG_01913	LBLHELLM_02083	CGJPMKCI_00739	JOHJONHN_00223	CNEDDIJH_01031	JLJGJGIB_00284
yhcB		Inner membrane protein YhcB	102	102	1	1	13502				398	398	398	DGJMBLJC_01507	HFDHOMNF_01268	ALEPGING_00919	GEOGNNEI_02350	BINKDPLB_02538	IPPPMGOG_00060	NCHKEDON_01241	PLMPIJHD_02978	LIBHOFBA_02790	MFAGDJPO_02759	AICMNGMC_03043	JAGDPAPJ_02978	JICHJFDH_03711	AHEHGMLM_04164	PABJNMJP_02305	MAPHOHON_03233	ONDKMJBG_04540	JDGDJJKN_01033	KLMHLHPE_04329	EGICBAEE_04396	LNEFCFII_04477	NILJAHBC_04425	KCIFOFJF_04468	CJCKLIFP_03676	IABBECJM_03719	LANDOHOG_04421	LOGCBOHO_03574	DKGFALGN_04248	PNFFMGCL_04086	BJCGHIIB_04164	NHHDDJBG_04024	LBLHELLM_04002	CGJPMKCI_04028	JOHJONHN_04355	CNEDDIJH_04330	JLJGJGIB_04140
yajC		Sec translocon accessory complex subunit YajC	102	102	1	1	492				332	332	332	DGJMBLJC_04918	HFDHOMNF_04345	ALEPGING_03184	GEOGNNEI_04351	BINKDPLB_02878	IPPPMGOG_00427	NCHKEDON_03129	PLMPIJHD_04462	LIBHOFBA_04545	MFAGDJPO_04337	AICMNGMC_04270	JAGDPAPJ_04455	JICHJFDH_03454	AHEHGMLM_03144	PABJNMJP_02199	MAPHOHON_03065	ONDKMJBG_02489	JDGDJJKN_03670	KLMHLHPE_03266	EGICBAEE_02443	LNEFCFII_03276	NILJAHBC_02858	KCIFOFJF_02156	CJCKLIFP_02594	IABBECJM_02636	LANDOHOG_02620	LOGCBOHO_03263	DKGFALGN_02195	PNFFMGCL_02806	BJCGHIIB_02797	NHHDDJBG_02587	LBLHELLM_02824	CGJPMKCI_03066	JOHJONHN_02626	CNEDDIJH_02168	JLJGJGIB_02222
rcnB		Nickel/cobalt homeostasis protein RcnB	102	102	1	1	9668				314	314	314	DGJMBLJC_04511	HFDHOMNF_01476	ALEPGING_01024	GEOGNNEI_00087	BINKDPLB_00718	IPPPMGOG_02664	NCHKEDON_02337	PLMPIJHD_04647	LIBHOFBA_03668	MFAGDJPO_04400	AICMNGMC_04456	JAGDPAPJ_00088	JICHJFDH_01682	AHEHGMLM_01043	PABJNMJP_03391	MAPHOHON_00088	ONDKMJBG_01878	JDGDJJKN_04038	KLMHLHPE_02055	EGICBAEE_01983	LNEFCFII_01087	NILJAHBC_01089	KCIFOFJF_00088	CJCKLIFP_01089	IABBECJM_00088	LANDOHOG_00087	LOGCBOHO_00087	DKGFALGN_01087	PNFFMGCL_00087	BJCGHIIB_01566	NHHDDJBG_00850	LBLHELLM_01579	CGJPMKCI_01556	JOHJONHN_01489	CNEDDIJH_02724	JLJGJGIB_00983
rng		Ribonuclease G	102	102	1	1	13518				1469	1469	1469	DGJMBLJC_02597	HFDHOMNF_02718	ALEPGING_03028	GEOGNNEI_02421	BINKDPLB_02853	IPPPMGOG_01223	NCHKEDON_03645	PLMPIJHD_03049	LIBHOFBA_02861	MFAGDJPO_02830	AICMNGMC_01743	JAGDPAPJ_03104	JICHJFDH_02113	AHEHGMLM_04032	PABJNMJP_02938	MAPHOHON_04526	ONDKMJBG_03836	JDGDJJKN_01010	KLMHLHPE_04400	EGICBAEE_04467	LNEFCFII_04505	NILJAHBC_04496	KCIFOFJF_04496	CJCKLIFP_04494	IABBECJM_04488	LANDOHOG_04492	LOGCBOHO_04495	DKGFALGN_04319	PNFFMGCL_04193	BJCGHIIB_04231	NHHDDJBG_04192	LBLHELLM_04136	CGJPMKCI_04098	JOHJONHN_04421	CNEDDIJH_04407	JLJGJGIB_03998
serA		D-3-phosphoglycerate dehydrogenase	102	102	1	1	1721				1232	1232	1232	DGJMBLJC_03408	HFDHOMNF_03805	ALEPGING_01592	GEOGNNEI_01545	BINKDPLB_00306	IPPPMGOG_04014	NCHKEDON_01821	PLMPIJHD_01339	LIBHOFBA_01149	MFAGDJPO_03317	AICMNGMC_01340	JAGDPAPJ_01483	JICHJFDH_01863	AHEHGMLM_03885	PABJNMJP_00146	MAPHOHON_02017	ONDKMJBG_02702	JDGDJJKN_01349	KLMHLHPE_01061	EGICBAEE_00718	LNEFCFII_01524	NILJAHBC_02168	KCIFOFJF_01703	CJCKLIFP_02311	IABBECJM_01525	LANDOHOG_01296	LOGCBOHO_01296	DKGFALGN_01320	PNFFMGCL_01378	BJCGHIIB_00855	NHHDDJBG_00306	LBLHELLM_00307	CGJPMKCI_01017	JOHJONHN_00771	CNEDDIJH_00861	JLJGJGIB_00811
rplS		50S ribosomal protein L19	102	102	1	1	16735				347	347	347	DGJMBLJC_01416	HFDHOMNF_03327	ALEPGING_01407	GEOGNNEI_02314	BINKDPLB_03039	IPPPMGOG_01188	NCHKEDON_02680	PLMPIJHD_02905	LIBHOFBA_02717	MFAGDJPO_02686	AICMNGMC_02970	JAGDPAPJ_02905	JICHJFDH_00012	AHEHGMLM_04094	PABJNMJP_02680	MAPHOHON_02352	ONDKMJBG_04646	JDGDJJKN_01678	KLMHLHPE_01397	EGICBAEE_01055	LNEFCFII_01187	NILJAHBC_01832	KCIFOFJF_04408	CJCKLIFP_04439	IABBECJM_01190	LANDOHOG_01631	LOGCBOHO_01631	DKGFALGN_04194	PNFFMGCL_04050	BJCGHIIB_01193	NHHDDJBG_04158	LBLHELLM_03922	CGJPMKCI_03993	JOHJONHN_04320	CNEDDIJH_04208	JLJGJGIB_03858
rimO		Ribosomal protein S12 methylthiotransferase RimO	102	102	1	1	5280				1325	1325	1325	DGJMBLJC_01241	HFDHOMNF_01391	ALEPGING_03572	GEOGNNEI_04386	BINKDPLB_01529	IPPPMGOG_03458	NCHKEDON_01536	PLMPIJHD_04497	LIBHOFBA_04580	MFAGDJPO_04516	AICMNGMC_04305	JAGDPAPJ_04490	JICHJFDH_00804	AHEHGMLM_02189	PABJNMJP_01772	MAPHOHON_03487	ONDKMJBG_04300	JDGDJJKN_00618	KLMHLHPE_03378	EGICBAEE_03532	LNEFCFII_03388	NILJAHBC_03600	KCIFOFJF_03385	CJCKLIFP_03709	IABBECJM_03752	LANDOHOG_03675	LOGCBOHO_03607	DKGFALGN_03291	PNFFMGCL_03897	BJCGHIIB_04070	NHHDDJBG_03455	LBLHELLM_03714	CGJPMKCI_03899	JOHJONHN_03589	CNEDDIJH_03110	JLJGJGIB_02579
rpoH		RNA polymerase sigma factor RpoH	102	102	1	1	14391				854	854	854	DGJMBLJC_01922	HFDHOMNF_01924	ALEPGING_01496	GEOGNNEI_03943	BINKDPLB_03680	IPPPMGOG_04539	NCHKEDON_03362	PLMPIJHD_01740	LIBHOFBA_01549	MFAGDJPO_01721	AICMNGMC_01599	JAGDPAPJ_01742	JICHJFDH_03321	AHEHGMLM_03419	PABJNMJP_04706	MAPHOHON_03001	ONDKMJBG_03605	JDGDJJKN_03411	KLMHLHPE_02612	EGICBAEE_03577	LNEFCFII_03574	NILJAHBC_03271	KCIFOFJF_03507	CJCKLIFP_03284	IABBECJM_03327	LANDOHOG_03325	LOGCBOHO_03011	DKGFALGN_03510	PNFFMGCL_02686	BJCGHIIB_02490	NHHDDJBG_02300	LBLHELLM_02464	CGJPMKCI_02288	JOHJONHN_03103	CNEDDIJH_02969	JLJGJGIB_01801
miaB		tRNA-2-methylthio-N(6)-dimethylallyladenosine synthase	102	102	1	1	4975				1424	1424	1424	DGJMBLJC_01089	HFDHOMNF_03163	ALEPGING_00017	GEOGNNEI_04104	BINKDPLB_03859	IPPPMGOG_03149	NCHKEDON_04624	PLMPIJHD_04214	LIBHOFBA_04297	MFAGDJPO_04089	AICMNGMC_04017	JAGDPAPJ_04208	JICHJFDH_02952	AHEHGMLM_00252	PABJNMJP_02831	MAPHOHON_03689	ONDKMJBG_03707	JDGDJJKN_00785	KLMHLHPE_02810	EGICBAEE_03322	LNEFCFII_03029	NILJAHBC_03468	KCIFOFJF_03110	CJCKLIFP_03425	IABBECJM_03488	LANDOHOG_03486	LOGCBOHO_03152	DKGFALGN_02851	PNFFMGCL_03611	BJCGHIIB_02707	NHHDDJBG_03365	LBLHELLM_01638	CGJPMKCI_02653	JOHJONHN_03430	CNEDDIJH_04086	JLJGJGIB_03747
hspQ		Heat shock protein HspQ	102	102	1	1	5689				317	317	317	DGJMBLJC_02945	HFDHOMNF_00036	ALEPGING_03491	GEOGNNEI_01144	BINKDPLB_04153	IPPPMGOG_04256	NCHKEDON_02812	PLMPIJHD_01002	LIBHOFBA_00814	MFAGDJPO_01004	AICMNGMC_01005	JAGDPAPJ_01148	JICHJFDH_02819	AHEHGMLM_01697	PABJNMJP_01664	MAPHOHON_01148	ONDKMJBG_00819	JDGDJJKN_00494	KLMHLHPE_00887	EGICBAEE_03018	LNEFCFII_00029	NILJAHBC_00029	KCIFOFJF_01149	CJCKLIFP_00029	IABBECJM_01149	LANDOHOG_01148	LOGCBOHO_01148	DKGFALGN_00029	PNFFMGCL_01204	BJCGHIIB_00681	NHHDDJBG_03111	LBLHELLM_00481	CGJPMKCI_00029	JOHJONHN_01105	CNEDDIJH_02652	JLJGJGIB_02804
ftsH		ATP-dependent zinc metalloprotease FtsH	102	102	1	1	13433				1934	1943	1941	DGJMBLJC_01561	HFDHOMNF_01214	ALEPGING_01354	GEOGNNEI_01839	BINKDPLB_03546	IPPPMGOG_03582	NCHKEDON_01410	PLMPIJHD_01764	LIBHOFBA_01573	MFAGDJPO_01745	AICMNGMC_01623	JAGDPAPJ_01766	JICHJFDH_03904	AHEHGMLM_04218	PABJNMJP_02359	MAPHOHON_03287	ONDKMJBG_03485	JDGDJJKN_01085	KLMHLHPE_04114	EGICBAEE_03817	LNEFCFII_03902	NILJAHBC_03920	KCIFOFJF_03835	CJCKLIFP_03622	IABBECJM_03665	LANDOHOG_03919	LOGCBOHO_03520	DKGFALGN_03534	PNFFMGCL_03249	BJCGHIIB_03510	NHHDDJBG_03490	LBLHELLM_03454	CGJPMKCI_03484	JOHJONHN_03756	CNEDDIJH_03278	JLJGJGIB_03447
group_18617		hypothetical protein	102	102	1	1	13151				614	614	614	DGJMBLJC_03571	HFDHOMNF_01120	ALEPGING_02808	GEOGNNEI_01924	BINKDPLB_01319	IPPPMGOG_03497	NCHKEDON_01497	PLMPIJHD_01850	LIBHOFBA_01660	MFAGDJPO_01832	AICMNGMC_01710	JAGDPAPJ_01852	JICHJFDH_01204	AHEHGMLM_03735	PABJNMJP_02444	MAPHOHON_03372	ONDKMJBG_03400	JDGDJJKN_01210	KLMHLHPE_04029	EGICBAEE_03903	LNEFCFII_03816	NILJAHBC_03835	KCIFOFJF_03750	CJCKLIFP_03537	IABBECJM_03580	LANDOHOG_03834	LOGCBOHO_03435	DKGFALGN_03619	PNFFMGCL_03373	BJCGHIIB_03387	NHHDDJBG_03575	LBLHELLM_03369	CGJPMKCI_03569	JOHJONHN_03671	CNEDDIJH_03193	JLJGJGIB_03362
aspA		Aspartate ammonia-lyase	102	102	1	1	16065				1436	1436	1436	DGJMBLJC_00340	HFDHOMNF_04313	ALEPGING_01955	GEOGNNEI_03488	BINKDPLB_04395	IPPPMGOG_02941	NCHKEDON_04330	PLMPIJHD_03762	LIBHOFBA_03852	MFAGDJPO_03572	AICMNGMC_03762	JAGDPAPJ_03763	JICHJFDH_02689	AHEHGMLM_01819	PABJNMJP_00592	MAPHOHON_01319	ONDKMJBG_02186	JDGDJJKN_02716	KLMHLHPE_03641	EGICBAEE_02700	LNEFCFII_02591	NILJAHBC_01319	KCIFOFJF_02741	CJCKLIFP_02836	IABBECJM_02928	LANDOHOG_02926	LOGCBOHO_02564	DKGFALGN_03012	PNFFMGCL_03476	BJCGHIIB_03813	NHHDDJBG_02438	LBLHELLM_02545	CGJPMKCI_02426	JOHJONHN_04191	CNEDDIJH_01863	JLJGJGIB_01881
gmk		Guanylate kinase	102	102	1	1	14062				623	623	623	DGJMBLJC_02108	HFDHOMNF_04076	ALEPGING_03133	GEOGNNEI_03754	BINKDPLB_04053	IPPPMGOG_02723	NCHKEDON_02505	PLMPIJHD_04034	LIBHOFBA_04119	MFAGDJPO_03844	AICMNGMC_02460	JAGDPAPJ_04034	JICHJFDH_01002	AHEHGMLM_01424	PABJNMJP_03574	MAPHOHON_02764	ONDKMJBG_04125	JDGDJJKN_03238	KLMHLHPE_02430	EGICBAEE_03170	LNEFCFII_02801	NILJAHBC_03090	KCIFOFJF_02958	CJCKLIFP_03047	IABBECJM_03090	LANDOHOG_03088	LOGCBOHO_02774	DKGFALGN_02679	PNFFMGCL_02506	BJCGHIIB_02310	NHHDDJBG_02120	LBLHELLM_02282	CGJPMKCI_02825	JOHJONHN_02496	CNEDDIJH_02217	JLJGJGIB_02427
dut		Deoxyuridine 5'-triphosphate nucleotidohydrolase	102	102	1	1	14085				458	458	458	DGJMBLJC_02099	HFDHOMNF_04067	ALEPGING_03609	GEOGNNEI_03745	BINKDPLB_04044	IPPPMGOG_02732	NCHKEDON_02496	PLMPIJHD_04025	LIBHOFBA_04110	MFAGDJPO_03835	AICMNGMC_02451	JAGDPAPJ_04025	JICHJFDH_01011	AHEHGMLM_01433	PABJNMJP_03583	MAPHOHON_02773	ONDKMJBG_04116	JDGDJJKN_03247	KLMHLHPE_02439	EGICBAEE_03161	LNEFCFII_02810	NILJAHBC_03099	KCIFOFJF_02949	CJCKLIFP_03056	IABBECJM_03099	LANDOHOG_03097	LOGCBOHO_02783	DKGFALGN_02670	PNFFMGCL_02515	BJCGHIIB_02319	NHHDDJBG_02129	LBLHELLM_02273	CGJPMKCI_02834	JOHJONHN_02505	CNEDDIJH_02226	JLJGJGIB_02436
argR_2		Arginine repressor	102	102	1	1	13506				470	470	470	DGJMBLJC_02607	HFDHOMNF_02708	ALEPGING_03400	GEOGNNEI_02431	BINKDPLB_02863	IPPPMGOG_01213	NCHKEDON_03635	PLMPIJHD_03059	LIBHOFBA_02871	MFAGDJPO_02840	AICMNGMC_01753	JAGDPAPJ_03114	JICHJFDH_02123	AHEHGMLM_04042	PABJNMJP_02948	MAPHOHON_04516	ONDKMJBG_03826	JDGDJJKN_01020	KLMHLHPE_04410	EGICBAEE_04477	LNEFCFII_04515	NILJAHBC_04506	KCIFOFJF_04506	CJCKLIFP_04504	IABBECJM_04478	LANDOHOG_04502	LOGCBOHO_04505	DKGFALGN_04329	PNFFMGCL_04203	BJCGHIIB_04241	NHHDDJBG_04202	LBLHELLM_04126	CGJPMKCI_04108	JOHJONHN_04411	CNEDDIJH_04397	JLJGJGIB_03988
group_18622		hypothetical protein	102	102	1	1	10781				617	623	622	DGJMBLJC_04794	HFDHOMNF_02651	ALEPGING_00284	GEOGNNEI_03342	BINKDPLB_00618	IPPPMGOG_00218	NCHKEDON_01083	PLMPIJHD_03585	LIBHOFBA_03360	MFAGDJPO_02221	AICMNGMC_03606	JAGDPAPJ_03603	JICHJFDH_01387	AHEHGMLM_00040	PABJNMJP_04570	MAPHOHON_01828	ONDKMJBG_00491	JDGDJJKN_04313	KLMHLHPE_01772	EGICBAEE_01532	LNEFCFII_02135	NILJAHBC_01776	KCIFOFJF_01540	CJCKLIFP_01643	IABBECJM_02429	LANDOHOG_02428	LOGCBOHO_02006	DKGFALGN_01988	PNFFMGCL_02185	BJCGHIIB_01806	NHHDDJBG_01294	LBLHELLM_01492	CGJPMKCI_01796	JOHJONHN_01659	CNEDDIJH_01405	JLJGJGIB_01264
ribA		GTP cyclohydrolase-2	102	102	1	1	7374				590	590	590	DGJMBLJC_04062	HFDHOMNF_00720	ALEPGING_02831	GEOGNNEI_00511	BINKDPLB_01002	IPPPMGOG_02183	NCHKEDON_03794	PLMPIJHD_00370	LIBHOFBA_00179	MFAGDJPO_00370	AICMNGMC_00370	JAGDPAPJ_00513	JICHJFDH_00502	AHEHGMLM_00618	PABJNMJP_01029	MAPHOHON_00513	ONDKMJBG_01454	JDGDJJKN_02080	KLMHLHPE_00253	EGICBAEE_00115	LNEFCFII_00663	NILJAHBC_00664	KCIFOFJF_00514	CJCKLIFP_00664	IABBECJM_00514	LANDOHOG_00513	LOGCBOHO_00513	DKGFALGN_00663	PNFFMGCL_00511	BJCGHIIB_03899	NHHDDJBG_01849	LBLHELLM_02147	CGJPMKCI_00675	JOHJONHN_00288	CNEDDIJH_00515	JLJGJGIB_00220
nusB		Transcription antitermination protein NusB	102	102	1	1	476				419	419	419	DGJMBLJC_04905	HFDHOMNF_01715	ALEPGING_03805	GEOGNNEI_01827	BINKDPLB_01769	IPPPMGOG_00440	NCHKEDON_03116	PLMPIJHD_01621	LIBHOFBA_01430	MFAGDJPO_01601	AICMNGMC_04678	JAGDPAPJ_04732	JICHJFDH_02658	AHEHGMLM_04417	PABJNMJP_02029	MAPHOHON_03651	ONDKMJBG_04334	JDGDJJKN_03682	KLMHLHPE_03412	EGICBAEE_02430	LNEFCFII_03422	NILJAHBC_02845	KCIFOFJF_02143	CJCKLIFP_02607	IABBECJM_02649	LANDOHOG_02607	LOGCBOHO_03718	DKGFALGN_02208	PNFFMGCL_03108	BJCGHIIB_03373	NHHDDJBG_02873	LBLHELLM_03109	CGJPMKCI_03219	JOHJONHN_02794	CNEDDIJH_02946	JLJGJGIB_02968
cysK		Cysteine synthase A	102	102	1	1	10372				971	971	971	DGJMBLJC_02195	HFDHOMNF_03076	ALEPGING_02146	GEOGNNEI_02699	BINKDPLB_01827	IPPPMGOG_00915	NCHKEDON_00867	PLMPIJHD_02667	LIBHOFBA_02479	MFAGDJPO_01287	AICMNGMC_02787	JAGDPAPJ_02722	JICHJFDH_02375	AHEHGMLM_02844	PABJNMJP_03969	MAPHOHON_02445	ONDKMJBG_03100	JDGDJJKN_02989	KLMHLHPE_02191	EGICBAEE_01318	LNEFCFII_01921	NILJAHBC_02459	KCIFOFJF_02349	CJCKLIFP_01428	IABBECJM_01816	LANDOHOG_01894	LOGCBOHO_02221	DKGFALGN_02385	PNFFMGCL_01853	BJCGHIIB_01861	NHHDDJBG_01667	LBLHELLM_01064	CGJPMKCI_02010	JOHJONHN_02218	CNEDDIJH_01460	JLJGJGIB_01478
rcsB		Transcriptional regulatory protein RcsB	102	102	1	1	9933				650	650	650	DGJMBLJC_02380	HFDHOMNF_04689	ALEPGING_03846	GEOGNNEI_02456	BINKDPLB_00823	IPPPMGOG_00787	NCHKEDON_00632	PLMPIJHD_02432	LIBHOFBA_02243	MFAGDJPO_01052	AICMNGMC_02552	JAGDPAPJ_02487	JICHJFDH_03096	AHEHGMLM_01147	PABJNMJP_03734	MAPHOHON_02680	ONDKMJBG_02864	JDGDJJKN_02755	KLMHLHPE_03079	EGICBAEE_01084	LNEFCFII_01687	NILJAHBC_02692	KCIFOFJF_02582	CJCKLIFP_01195	IABBECJM_02049	LANDOHOG_01661	LOGCBOHO_02454	DKGFALGN_03107	PNFFMGCL_02016	BJCGHIIB_03223	NHHDDJBG_02738	LBLHELLM_02847	CGJPMKCI_03198	JOHJONHN_02031	CNEDDIJH_04255	JLJGJGIB_03964
typA		GTP-binding protein TypA/BipA	102	102	1	1	15369				1823	1823	1823	DGJMBLJC_00909	HFDHOMNF_01848	ALEPGING_02951	GEOGNNEI_01949	BINKDPLB_01607	IPPPMGOG_03696	NCHKEDON_02111	PLMPIJHD_02061	LIBHOFBA_01869	MFAGDJPO_01928	AICMNGMC_01902	JAGDPAPJ_02061	JICHJFDH_04018	AHEHGMLM_02580	PABJNMJP_02989	MAPHOHON_03898	ONDKMJBG_02467	JDGDJJKN_04008	KLMHLHPE_03707	EGICBAEE_03927	LNEFCFII_04039	NILJAHBC_04056	KCIFOFJF_04043	CJCKLIFP_04065	IABBECJM_04108	LANDOHOG_04055	LOGCBOHO_04103	DKGFALGN_03643	PNFFMGCL_03087	BJCGHIIB_02948	NHHDDJBG_03155	LBLHELLM_03222	CGJPMKCI_03462	JOHJONHN_02945	CNEDDIJH_03413	JLJGJGIB_03247
recA		Protein RecA	102	102	1	1	2170				1061	1061	1061	DGJMBLJC_01287	HFDHOMNF_03431	ALEPGING_02307	GEOGNNEI_01299	BINKDPLB_00060	IPPPMGOG_01097	NCHKEDON_01397	PLMPIJHD_01093	LIBHOFBA_00903	MFAGDJPO_03071	AICMNGMC_01094	JAGDPAPJ_01237	JICHJFDH_00103	AHEHGMLM_02664	PABJNMJP_00391	MAPHOHON_02262	ONDKMJBG_00594	JDGDJJKN_01591	KLMHLHPE_01307	EGICBAEE_00963	LNEFCFII_01277	NILJAHBC_01922	KCIFOFJF_01949	CJCKLIFP_02065	IABBECJM_01280	LANDOHOG_01541	LOGCBOHO_01541	DKGFALGN_01566	PNFFMGCL_01623	BJCGHIIB_01101	NHHDDJBG_00060	LBLHELLM_00061	CGJPMKCI_01263	JOHJONHN_01017	CNEDDIJH_00615	JLJGJGIB_00565
parE		DNA topoisomerase 4 subunit B	102	102	1	1	13110				1892	1892	1892	DGJMBLJC_03547	HFDHOMNF_03662	ALEPGING_00246	GEOGNNEI_01677	BINKDPLB_02350	IPPPMGOG_04146	NCHKEDON_01953	PLMPIJHD_01471	LIBHOFBA_01281	MFAGDJPO_03449	AICMNGMC_01472	JAGDPAPJ_01615	JICHJFDH_02988	AHEHGMLM_04275	PABJNMJP_00014	MAPHOHON_01885	ONDKMJBG_02833	JDGDJJKN_01232	KLMHLHPE_00929	EGICBAEE_00586	LNEFCFII_01656	NILJAHBC_04557	KCIFOFJF_04557	CJCKLIFP_04555	IABBECJM_04554	LANDOHOG_04553	LOGCBOHO_04556	DKGFALGN_01188	PNFFMGCL_01246	BJCGHIIB_00723	NHHDDJBG_00438	LBLHELLM_00439	CGJPMKCI_00885	JOHJONHN_00639	CNEDDIJH_00993	JLJGJGIB_04090
group_18632		hypothetical protein	102	102	1	1	15785				209	212	211	DGJMBLJC_00558	HFDHOMNF_04210	ALEPGING_01790	GEOGNNEI_03573	BINKDPLB_01480	IPPPMGOG_03902	NCHKEDON_04244	PLMPIJHD_03848	LIBHOFBA_03938	MFAGDJPO_03658	AICMNGMC_03847	JAGDPAPJ_03849	JICHJFDH_04131	AHEHGMLM_01905	PABJNMJP_00507	MAPHOHON_01234	ONDKMJBG_02271	JDGDJJKN_03813	KLMHLHPE_03868	EGICBAEE_02785	LNEFCFII_02676	NILJAHBC_01233	KCIFOFJF_02656	CJCKLIFP_02922	IABBECJM_02842	LANDOHOG_02840	LOGCBOHO_02649	DKGFALGN_04044	PNFFMGCL_03685	BJCGHIIB_03550	NHHDDJBG_02523	LBLHELLM_02631	CGJPMKCI_02511	JOHJONHN_03274	CNEDDIJH_01949	JLJGJGIB_01967
ihfA		Integration host factor subunit alpha	102	102	1	1	6192				299	299	299	DGJMBLJC_03781	HFDHOMNF_00314	ALEPGING_01241	GEOGNNEI_00889	BINKDPLB_02238	IPPPMGOG_01900	NCHKEDON_00250	PLMPIJHD_00746	LIBHOFBA_00558	MFAGDJPO_00748	AICMNGMC_00749	JAGDPAPJ_00892	JICHJFDH_04264	AHEHGMLM_02949	PABJNMJP_01407	MAPHOHON_00891	ONDKMJBG_01076	JDGDJJKN_00237	KLMHLHPE_00631	EGICBAEE_00493	LNEFCFII_00285	NILJAHBC_00286	KCIFOFJF_00892	CJCKLIFP_00286	IABBECJM_00892	LANDOHOG_00891	LOGCBOHO_00891	DKGFALGN_00285	PNFFMGCL_00889	BJCGHIIB_00366	NHHDDJBG_00609	LBLHELLM_00736	CGJPMKCI_00284	JOHJONHN_01361	CNEDDIJH_00137	JLJGJGIB_02181
cmk		Cytidylate kinase	102	102	1	1	5454				683	683	683	DGJMBLJC_02830	HFDHOMNF_01293	ALEPGING_03077	GEOGNNEI_04474	BINKDPLB_03009	IPPPMGOG_00819	NCHKEDON_03055	PLMPIJHD_04585	LIBHOFBA_04668	MFAGDJPO_04604	AICMNGMC_04393	JAGDPAPJ_04578	JICHJFDH_00893	AHEHGMLM_02278	PABJNMJP_01862	MAPHOHON_03398	ONDKMJBG_04211	JDGDJJKN_00540	KLMHLHPE_03290	EGICBAEE_03443	LNEFCFII_03300	NILJAHBC_03688	KCIFOFJF_03473	CJCKLIFP_03797	IABBECJM_03840	LANDOHOG_03587	LOGCBOHO_03695	DKGFALGN_03379	PNFFMGCL_04225	BJCGHIIB_03744	NHHDDJBG_04228	LBLHELLM_04100	CGJPMKCI_03680	JOHJONHN_04461	CNEDDIJH_04447	JLJGJGIB_02667
uxuA		Mannonate dehydratase	102	102	1	1	13030				1184	1184	1184	DGJMBLJC_03495	HFDHOMNF_03714	ALEPGING_00999	GEOGNNEI_01630	BINKDPLB_02303	IPPPMGOG_04099	NCHKEDON_01906	PLMPIJHD_01424	LIBHOFBA_01234	MFAGDJPO_03402	AICMNGMC_01425	JAGDPAPJ_01568	JICHJFDH_03035	AHEHGMLM_03800	PABJNMJP_00061	MAPHOHON_01932	ONDKMJBG_02786	JDGDJJKN_01279	KLMHLHPE_00976	EGICBAEE_00633	LNEFCFII_01609	NILJAHBC_02254	KCIFOFJF_01617	CJCKLIFP_02397	IABBECJM_01611	LANDOHOG_01210	LOGCBOHO_01210	DKGFALGN_01235	PNFFMGCL_01293	BJCGHIIB_00770	NHHDDJBG_00391	LBLHELLM_00392	CGJPMKCI_00932	JOHJONHN_00686	CNEDDIJH_00946	JLJGJGIB_00896
guaA		GMP synthase [glutamine-hydrolyzing]	102	102	1	1	10520				1577	1577	1577	DGJMBLJC_00928	HFDHOMNF_02994	ALEPGING_01124	GEOGNNEI_02776	BINKDPLB_01904	IPPPMGOG_00838	NCHKEDON_00944	PLMPIJHD_02744	LIBHOFBA_02556	MFAGDJPO_01364	AICMNGMC_02864	JAGDPAPJ_02799	JICHJFDH_03555	AHEHGMLM_02766	PABJNMJP_04047	MAPHOHON_02368	ONDKMJBG_03177	JDGDJJKN_03075	KLMHLHPE_02268	EGICBAEE_01395	LNEFCFII_01998	NILJAHBC_02382	KCIFOFJF_03308	CJCKLIFP_01505	IABBECJM_01739	LANDOHOG_01971	LOGCBOHO_02144	DKGFALGN_02462	PNFFMGCL_01776	BJCGHIIB_01938	NHHDDJBG_01744	LBLHELLM_00987	CGJPMKCI_01933	JOHJONHN_02141	CNEDDIJH_01537	JLJGJGIB_01401
potE		Putrescine transporter PotE	102	102	1	1	5008				1319	1319	1319	DGJMBLJC_01119	HFDHOMNF_03132	ALEPGING_04292	GEOGNNEI_04134	BINKDPLB_03889	IPPPMGOG_03179	NCHKEDON_04654	PLMPIJHD_04244	LIBHOFBA_04327	MFAGDJPO_04119	AICMNGMC_04047	JAGDPAPJ_04238	JICHJFDH_00735	AHEHGMLM_03684	PABJNMJP_02861	MAPHOHON_03659	ONDKMJBG_03677	JDGDJJKN_00755	KLMHLHPE_02780	EGICBAEE_03292	LNEFCFII_03059	NILJAHBC_03438	KCIFOFJF_03080	CJCKLIFP_03395	IABBECJM_03518	LANDOHOG_03516	LOGCBOHO_03122	DKGFALGN_02881	PNFFMGCL_04024	BJCGHIIB_02737	NHHDDJBG_04006	LBLHELLM_03809	CGJPMKCI_02623	JOHJONHN_04078	CNEDDIJH_03769	JLJGJGIB_03903
rlmL		Ribosomal RNA large subunit methyltransferase K/L	102	102	1	1	5666				2108	2108	2108	DGJMBLJC_02926	HFDHOMNF_00016	ALEPGING_03052	GEOGNNEI_01161	BINKDPLB_04136	IPPPMGOG_04239	NCHKEDON_02795	PLMPIJHD_01019	LIBHOFBA_00831	MFAGDJPO_01021	AICMNGMC_01022	JAGDPAPJ_01165	JICHJFDH_02837	AHEHGMLM_01714	PABJNMJP_01681	MAPHOHON_01165	ONDKMJBG_00802	JDGDJJKN_00511	KLMHLHPE_00904	EGICBAEE_03035	LNEFCFII_00012	NILJAHBC_00012	KCIFOFJF_01166	CJCKLIFP_00012	IABBECJM_01166	LANDOHOG_01165	LOGCBOHO_01165	DKGFALGN_00012	PNFFMGCL_01221	BJCGHIIB_00698	NHHDDJBG_03128	LBLHELLM_00464	CGJPMKCI_00012	JOHJONHN_01088	CNEDDIJH_02669	JLJGJGIB_02821
infA		Translation initiation factor IF-1	102	102	1	1	5403				218	218	218	DGJMBLJC_01179	HFDHOMNF_01322	ALEPGING_04188	GEOGNNEI_04449	BINKDPLB_03086	IPPPMGOG_03395	NCHKEDON_01599	PLMPIJHD_04560	LIBHOFBA_04643	MFAGDJPO_04579	AICMNGMC_04368	JAGDPAPJ_04553	JICHJFDH_00867	AHEHGMLM_02253	PABJNMJP_01836	MAPHOHON_03423	ONDKMJBG_04236	JDGDJJKN_00564	KLMHLHPE_03315	EGICBAEE_03468	LNEFCFII_03325	NILJAHBC_03663	KCIFOFJF_03448	CJCKLIFP_03772	IABBECJM_03815	LANDOHOG_03612	LOGCBOHO_03670	DKGFALGN_03354	PNFFMGCL_04160	BJCGHIIB_03719	NHHDDJBG_03392	LBLHELLM_04076	CGJPMKCI_03705	JOHJONHN_03652	CNEDDIJH_03174	JLJGJGIB_02642
smg		Protein Smg	102	102	1	1	14630				473	473	473	DGJMBLJC_02774	HFDHOMNF_02781	ALEPGING_01811	GEOGNNEI_02904	BINKDPLB_03111	IPPPMGOG_02083	NCHKEDON_01623	PLMPIJHD_03151	LIBHOFBA_02914	MFAGDJPO_02928	AICMNGMC_03132	JAGDPAPJ_03157	JICHJFDH_01120	AHEHGMLM_04309	PABJNMJP_01737	MAPHOHON_04619	ONDKMJBG_00042	JDGDJJKN_04511	KLMHLHPE_04489	EGICBAEE_04520	LNEFCFII_04558	NILJAHBC_04576	KCIFOFJF_04576	CJCKLIFP_04610	IABBECJM_04573	LANDOHOG_04608	LOGCBOHO_04611	DKGFALGN_04530	PNFFMGCL_04277	BJCGHIIB_04285	NHHDDJBG_04311	LBLHELLM_04190	CGJPMKCI_04239	JOHJONHN_04509	CNEDDIJH_04521	JLJGJGIB_04273
envZ		Osmolarity sensor protein EnvZ	102	102	1	1	14497				1352	1352	1352	DGJMBLJC_01849	HFDHOMNF_03586	ALEPGING_01721	GEOGNNEI_03884	BINKDPLB_03621	IPPPMGOG_04598	NCHKEDON_03303	PLMPIJHD_01681	LIBHOFBA_01490	MFAGDJPO_01662	AICMNGMC_01540	JAGDPAPJ_01683	JICHJFDH_03380	AHEHGMLM_03478	PABJNMJP_04647	MAPHOHON_02942	ONDKMJBG_03546	JDGDJJKN_03476	KLMHLHPE_02671	EGICBAEE_03635	LNEFCFII_03632	NILJAHBC_03330	KCIFOFJF_03566	CJCKLIFP_03225	IABBECJM_03268	LANDOHOG_03266	LOGCBOHO_02952	DKGFALGN_03451	PNFFMGCL_02745	BJCGHIIB_02549	NHHDDJBG_02359	LBLHELLM_02405	CGJPMKCI_02347	JOHJONHN_03162	CNEDDIJH_03027	JLJGJGIB_01742
rpiA		Ribose-5-phosphate isomerase A	102	102	1	1	1719				659	659	659	DGJMBLJC_03409	HFDHOMNF_03804	ALEPGING_01591	GEOGNNEI_01546	BINKDPLB_00307	IPPPMGOG_04015	NCHKEDON_01822	PLMPIJHD_01340	LIBHOFBA_01150	MFAGDJPO_03318	AICMNGMC_01341	JAGDPAPJ_01484	JICHJFDH_01862	AHEHGMLM_03884	PABJNMJP_00145	MAPHOHON_02016	ONDKMJBG_02703	JDGDJJKN_01348	KLMHLHPE_01060	EGICBAEE_00717	LNEFCFII_01525	NILJAHBC_02169	KCIFOFJF_01702	CJCKLIFP_02312	IABBECJM_01526	LANDOHOG_01295	LOGCBOHO_01295	DKGFALGN_01319	PNFFMGCL_01377	BJCGHIIB_00854	NHHDDJBG_00307	LBLHELLM_00308	CGJPMKCI_01016	JOHJONHN_00770	CNEDDIJH_00862	JLJGJGIB_00812
emtA		Endo-type membrane-bound lytic murein transglycosylase A	102	102	1	1	7535				611	611	611	DGJMBLJC_03211	HFDHOMNF_00816	ALEPGING_00225	GEOGNNEI_00422	BINKDPLB_01091	IPPPMGOG_02342	NCHKEDON_03884	PLMPIJHD_00280	LIBHOFBA_00089	MFAGDJPO_00280	AICMNGMC_00280	JAGDPAPJ_00423	JICHJFDH_00414	AHEHGMLM_00708	PABJNMJP_00939	MAPHOHON_00423	ONDKMJBG_01544	JDGDJJKN_01991	KLMHLHPE_00164	EGICBAEE_00025	LNEFCFII_00753	NILJAHBC_00755	KCIFOFJF_00423	CJCKLIFP_00755	IABBECJM_00423	LANDOHOG_00422	LOGCBOHO_00422	DKGFALGN_00753	PNFFMGCL_00422	BJCGHIIB_01232	NHHDDJBG_01938	LBLHELLM_02058	CGJPMKCI_00764	JOHJONHN_00198	CNEDDIJH_01056	JLJGJGIB_00309
ptsN		Nitrogen regulatory protein	102	102	1	1	13464				491	491	491	DGJMBLJC_01533	HFDHOMNF_01243	ALEPGING_00945	GEOGNNEI_02376	BINKDPLB_02564	IPPPMGOG_00034	NCHKEDON_01267	PLMPIJHD_03004	LIBHOFBA_02816	MFAGDJPO_02785	AICMNGMC_03069	JAGDPAPJ_03004	JICHJFDH_03685	AHEHGMLM_04190	PABJNMJP_02331	MAPHOHON_03259	ONDKMJBG_04566	JDGDJJKN_01058	KLMHLHPE_04355	EGICBAEE_04422	LNEFCFII_04451	NILJAHBC_04451	KCIFOFJF_04442	CJCKLIFP_03650	IABBECJM_03693	LANDOHOG_04447	LOGCBOHO_03548	DKGFALGN_04274	PNFFMGCL_04112	BJCGHIIB_04190	NHHDDJBG_04050	LBLHELLM_04028	CGJPMKCI_04054	JOHJONHN_04381	CNEDDIJH_04304	JLJGJGIB_04110
uspF		Universal stress protein F	102	102	1	1	7249				434	434	434	DGJMBLJC_04134	HFDHOMNF_00659	ALEPGING_03688	GEOGNNEI_00570	BINKDPLB_02820	IPPPMGOG_01581	NCHKEDON_00569	PLMPIJHD_00429	LIBHOFBA_00238	MFAGDJPO_00429	AICMNGMC_00429	JAGDPAPJ_00572	JICHJFDH_00561	AHEHGMLM_00559	PABJNMJP_01088	MAPHOHON_00572	ONDKMJBG_01395	JDGDJJKN_02152	KLMHLHPE_00312	EGICBAEE_00174	LNEFCFII_00604	NILJAHBC_00605	KCIFOFJF_00573	CJCKLIFP_00605	IABBECJM_00573	LANDOHOG_00572	LOGCBOHO_00572	DKGFALGN_00604	PNFFMGCL_00570	BJCGHIIB_00048	NHHDDJBG_01607	LBLHELLM_01790	CGJPMKCI_00616	JOHJONHN_00347	CNEDDIJH_00456	JLJGJGIB_00161
fkpB		FKBP-type 16 kDa peptidyl-prolyl cis-trans isomerase	102	102	1	1	11079				449	449	449	DGJMBLJC_00008	HFDHOMNF_02467	ALEPGING_02588	GEOGNNEI_03182	BINKDPLB_00458	IPPPMGOG_03240	NCHKEDON_03620	PLMPIJHD_03425	LIBHOFBA_03200	MFAGDJPO_02525	AICMNGMC_03446	JAGDPAPJ_03443	JICHJFDH_02139	AHEHGMLM_03262	PABJNMJP_04410	MAPHOHON_01668	ONDKMJBG_00331	JDGDJJKN_02395	KLMHLHPE_01612	EGICBAEE_01692	LNEFCFII_02295	NILJAHBC_01616	KCIFOFJF_01380	CJCKLIFP_01803	IABBECJM_02269	LANDOHOG_02268	LOGCBOHO_01846	DKGFALGN_01828	PNFFMGCL_02431	BJCGHIIB_02038	NHHDDJBG_01244	LBLHELLM_01123	CGJPMKCI_02028	JOHJONHN_04595	CNEDDIJH_01637	JLJGJGIB_04307
hisF		Imidazole glycerol phosphate synthase subunit HisF	102	102	1	1	9470				776	776	776	DGJMBLJC_04406	HFDHOMNF_01101	ALEPGING_04357	GEOGNNEI_00149	BINKDPLB_02937	IPPPMGOG_02614	NCHKEDON_04156	PLMPIJHD_00007	LIBHOFBA_03606	MFAGDJPO_00007	AICMNGMC_00007	JAGDPAPJ_00150	JICHJFDH_01620	AHEHGMLM_00981	PABJNMJP_03329	MAPHOHON_00150	ONDKMJBG_01816	JDGDJJKN_01702	KLMHLHPE_01993	EGICBAEE_02046	LNEFCFII_01025	NILJAHBC_01027	KCIFOFJF_00150	CJCKLIFP_01027	IABBECJM_00150	LANDOHOG_00149	LOGCBOHO_00149	DKGFALGN_01025	PNFFMGCL_00149	BJCGHIIB_01504	NHHDDJBG_00912	LBLHELLM_03244	CGJPMKCI_01494	JOHJONHN_01551	CNEDDIJH_03789	JLJGJGIB_01045
group_18656		IS1595 family transposase ISSsu9	102	102	1	1	10992				479	479	479	DGJMBLJC_04659	HFDHOMNF_02509	ALEPGING_01768	GEOGNNEI_03220	BINKDPLB_00496	IPPPMGOG_00096	NCHKEDON_01205	PLMPIJHD_03463	LIBHOFBA_03238	MFAGDJPO_02563	AICMNGMC_03484	JAGDPAPJ_03481	JICHJFDH_01510	AHEHGMLM_00162	PABJNMJP_04448	MAPHOHON_01706	ONDKMJBG_00369	JDGDJJKN_02358	KLMHLHPE_01650	EGICBAEE_01654	LNEFCFII_02257	NILJAHBC_01654	KCIFOFJF_01418	CJCKLIFP_01765	IABBECJM_02307	LANDOHOG_02306	LOGCBOHO_01884	DKGFALGN_01866	PNFFMGCL_02063	BJCGHIIB_01684	NHHDDJBG_01416	LBLHELLM_01370	CGJPMKCI_01674	JOHJONHN_01781	CNEDDIJH_01283	JLJGJGIB_01142
ftsE		Cell division ATP-binding protein FtsE	102	102	1	1	14389				668	668	668	DGJMBLJC_01924	HFDHOMNF_01922	ALEPGING_01494	GEOGNNEI_03945	BINKDPLB_03682	IPPPMGOG_04537	NCHKEDON_03364	PLMPIJHD_01742	LIBHOFBA_01551	MFAGDJPO_01723	AICMNGMC_01601	JAGDPAPJ_01744	JICHJFDH_03319	AHEHGMLM_03417	PABJNMJP_04708	MAPHOHON_03003	ONDKMJBG_03607	JDGDJJKN_03409	KLMHLHPE_02610	EGICBAEE_03575	LNEFCFII_03572	NILJAHBC_03269	KCIFOFJF_03505	CJCKLIFP_03286	IABBECJM_03329	LANDOHOG_03327	LOGCBOHO_03013	DKGFALGN_03512	PNFFMGCL_02684	BJCGHIIB_02488	NHHDDJBG_02298	LBLHELLM_02466	CGJPMKCI_02286	JOHJONHN_03101	CNEDDIJH_02967	JLJGJGIB_01803
uraA		Uracil permease	102	102	1	1	10484				1289	1289	1289	DGJMBLJC_02713	HFDHOMNF_03005	ALEPGING_01067	GEOGNNEI_02766	BINKDPLB_01894	IPPPMGOG_00848	NCHKEDON_00934	PLMPIJHD_02734	LIBHOFBA_02546	MFAGDJPO_01354	AICMNGMC_02854	JAGDPAPJ_02789	JICHJFDH_03565	AHEHGMLM_02776	PABJNMJP_04037	MAPHOHON_02378	ONDKMJBG_03167	JDGDJJKN_03057	KLMHLHPE_02258	EGICBAEE_01385	LNEFCFII_01988	NILJAHBC_02392	KCIFOFJF_03318	CJCKLIFP_01495	IABBECJM_01749	LANDOHOG_01961	LOGCBOHO_02154	DKGFALGN_02452	PNFFMGCL_01786	BJCGHIIB_01928	NHHDDJBG_01734	LBLHELLM_00997	CGJPMKCI_01943	JOHJONHN_02151	CNEDDIJH_01527	JLJGJGIB_01411
dnaJ		Chaperone protein DnaJ	102	102	1	1	11173				1127	1139	1138	DGJMBLJC_00048	HFDHOMNF_02430	ALEPGING_02624	GEOGNNEI_03146	BINKDPLB_00422	IPPPMGOG_03276	NCHKEDON_03584	PLMPIJHD_03389	LIBHOFBA_03164	MFAGDJPO_02489	AICMNGMC_03410	JAGDPAPJ_03407	JICHJFDH_02175	AHEHGMLM_03298	PABJNMJP_04374	MAPHOHON_01632	ONDKMJBG_00295	JDGDJJKN_02431	KLMHLHPE_01576	EGICBAEE_01728	LNEFCFII_02331	NILJAHBC_01580	KCIFOFJF_01344	CJCKLIFP_01839	IABBECJM_02233	LANDOHOG_02232	LOGCBOHO_01810	DKGFALGN_01792	PNFFMGCL_02395	BJCGHIIB_02074	NHHDDJBG_01208	LBLHELLM_01159	CGJPMKCI_02064	JOHJONHN_02261	CNEDDIJH_01673	JLJGJGIB_01521
group_18660		hypothetical protein	102	102	1	1	13555				221	221	221	DGJMBLJC_02571	HFDHOMNF_02741	ALEPGING_03345	GEOGNNEI_02399	BINKDPLB_02831	IPPPMGOG_01245	NCHKEDON_03667	PLMPIJHD_03027	LIBHOFBA_02839	MFAGDJPO_02808	AICMNGMC_01721	JAGDPAPJ_03082	JICHJFDH_02091	AHEHGMLM_04010	PABJNMJP_02916	MAPHOHON_04548	ONDKMJBG_03858	JDGDJJKN_00965	KLMHLHPE_04378	EGICBAEE_04445	LNEFCFII_04483	NILJAHBC_04474	KCIFOFJF_04474	CJCKLIFP_04472	IABBECJM_04510	LANDOHOG_04470	LOGCBOHO_04473	DKGFALGN_04297	PNFFMGCL_04171	BJCGHIIB_04380	NHHDDJBG_04170	LBLHELLM_04298	CGJPMKCI_04076	JOHJONHN_04443	CNEDDIJH_04429	JLJGJGIB_04020
cueR		HTH-type transcriptional regulator CueR	102	102	1	1	354				416	416	416	DGJMBLJC_00741	HFDHOMNF_01627	ALEPGING_00440	GEOGNNEI_01745	BINKDPLB_02418	IPPPMGOG_00522	NCHKEDON_02978	PLMPIJHD_01539	LIBHOFBA_01349	MFAGDJPO_01520	AICMNGMC_04597	JAGDPAPJ_04650	JICHJFDH_00252	AHEHGMLM_03555	PABJNMJP_01948	MAPHOHON_03570	ONDKMJBG_04415	JDGDJJKN_00957	KLMHLHPE_03494	EGICBAEE_02349	LNEFCFII_03503	NILJAHBC_02764	KCIFOFJF_02063	CJCKLIFP_02688	IABBECJM_02730	LANDOHOG_02526	LOGCBOHO_03799	DKGFALGN_02289	PNFFMGCL_03189	BJCGHIIB_03292	NHHDDJBG_02955	LBLHELLM_03027	CGJPMKCI_03301	JOHJONHN_02875	CNEDDIJH_02865	JLJGJGIB_02887
atpH		ATP synthase subunit delta	102	102	1	1	15044				533	533	533	DGJMBLJC_01740	HFDHOMNF_02068	ALEPGING_00603	GEOGNNEI_02141	BINKDPLB_02116	IPPPMGOG_03734	NCHKEDON_02625	PLMPIJHD_02183	LIBHOFBA_01991	MFAGDJPO_03964	AICMNGMC_02110	JAGDPAPJ_02183	JICHJFDH_01967	AHEHGMLM_03089	PABJNMJP_03154	MAPHOHON_04118	ONDKMJBG_03880	JDGDJJKN_04383	KLMHLHPE_04250	EGICBAEE_04145	LNEFCFII_04257	NILJAHBC_04323	KCIFOFJF_04239	CJCKLIFP_04329	IABBECJM_04395	LANDOHOG_04319	LOGCBOHO_04371	DKGFALGN_04016	PNFFMGCL_03825	BJCGHIIB_03931	NHHDDJBG_03803	LBLHELLM_03590	CGJPMKCI_03752	JOHJONHN_03981	CNEDDIJH_03672	JLJGJGIB_03583
ratA		Ribosome association toxin RatA	102	102	1	1	16717				437	437	437	DGJMBLJC_01429	HFDHOMNF_03340	ALEPGING_04005	GEOGNNEI_02327	BINKDPLB_03052	IPPPMGOG_01175	NCHKEDON_02667	PLMPIJHD_02918	LIBHOFBA_02730	MFAGDJPO_02699	AICMNGMC_02983	JAGDPAPJ_02918	JICHJFDH_00025	AHEHGMLM_04081	PABJNMJP_02667	MAPHOHON_02339	ONDKMJBG_04633	JDGDJJKN_01665	KLMHLHPE_01384	EGICBAEE_01042	LNEFCFII_01200	NILJAHBC_01845	KCIFOFJF_04395	CJCKLIFP_04452	IABBECJM_01203	LANDOHOG_01618	LOGCBOHO_01618	DKGFALGN_04181	PNFFMGCL_04063	BJCGHIIB_01180	NHHDDJBG_04145	LBLHELLM_03935	CGJPMKCI_04006	JOHJONHN_04333	CNEDDIJH_04221	JLJGJGIB_03871
gltA		Citrate synthase	102	102	1	1	5064				1283	1283	1283	DGJMBLJC_01138	HFDHOMNF_03114	ALEPGING_00531	GEOGNNEI_04151	BINKDPLB_03906	IPPPMGOG_03196	NCHKEDON_04671	PLMPIJHD_04261	LIBHOFBA_04344	MFAGDJPO_04136	AICMNGMC_04064	JAGDPAPJ_04255	JICHJFDH_00752	AHEHGMLM_03667	PABJNMJP_02878	MAPHOHON_04471	ONDKMJBG_03660	JDGDJJKN_00738	KLMHLHPE_02763	EGICBAEE_03275	LNEFCFII_03076	NILJAHBC_03421	KCIFOFJF_03063	CJCKLIFP_03378	IABBECJM_03535	LANDOHOG_03533	LOGCBOHO_03105	DKGFALGN_02898	PNFFMGCL_04007	BJCGHIIB_02754	NHHDDJBG_03989	LBLHELLM_03826	CGJPMKCI_02606	JOHJONHN_04061	CNEDDIJH_03752	JLJGJGIB_03920
waaA		3-deoxy-D-manno-octulosonic acid transferase	102	102	1	1	14092				1277	1277	1277	DGJMBLJC_02092	HFDHOMNF_04060	ALEPGING_03616	GEOGNNEI_03738	BINKDPLB_04037	IPPPMGOG_02739	NCHKEDON_02489	PLMPIJHD_04018	LIBHOFBA_04103	MFAGDJPO_03828	AICMNGMC_02444	JAGDPAPJ_04018	JICHJFDH_01018	AHEHGMLM_01440	PABJNMJP_03590	MAPHOHON_02780	ONDKMJBG_04109	JDGDJJKN_03254	KLMHLHPE_02446	EGICBAEE_03154	LNEFCFII_02817	NILJAHBC_03106	KCIFOFJF_02942	CJCKLIFP_03063	IABBECJM_03106	LANDOHOG_03104	LOGCBOHO_02790	DKGFALGN_02663	PNFFMGCL_02522	BJCGHIIB_02326	NHHDDJBG_02136	LBLHELLM_02266	CGJPMKCI_02841	JOHJONHN_02512	CNEDDIJH_02233	JLJGJGIB_02443
bfr		Bacterioferritin	102	102	1	1	14584				476	476	476	DGJMBLJC_02815	HFDHOMNF_02820	ALEPGING_01850	GEOGNNEI_02943	BINKDPLB_03150	IPPPMGOG_02122	NCHKEDON_01662	PLMPIJHD_03190	LIBHOFBA_02953	MFAGDJPO_02967	AICMNGMC_03171	JAGDPAPJ_03196	JICHJFDH_01159	AHEHGMLM_04348	PABJNMJP_01698	MAPHOHON_04658	ONDKMJBG_00003	JDGDJJKN_04472	KLMHLHPE_04450	EGICBAEE_04559	LNEFCFII_04597	NILJAHBC_04615	KCIFOFJF_04615	CJCKLIFP_04571	IABBECJM_04612	LANDOHOG_04569	LOGCBOHO_04572	DKGFALGN_04491	PNFFMGCL_04316	BJCGHIIB_04324	NHHDDJBG_04272	LBLHELLM_04229	CGJPMKCI_04278	JOHJONHN_04548	CNEDDIJH_04560	JLJGJGIB_04313
lolB		Outer-membrane lipoprotein LolB	102	102	1	1	7477				623	623	623	DGJMBLJC_02669	HFDHOMNF_00791	ALEPGING_04487	GEOGNNEI_00445	BINKDPLB_01068	IPPPMGOG_02319	NCHKEDON_03861	PLMPIJHD_00303	LIBHOFBA_00112	MFAGDJPO_00303	AICMNGMC_00303	JAGDPAPJ_00446	JICHJFDH_00437	AHEHGMLM_00685	PABJNMJP_00962	MAPHOHON_00446	ONDKMJBG_01521	JDGDJJKN_02013	KLMHLHPE_00187	EGICBAEE_00048	LNEFCFII_00730	NILJAHBC_00732	KCIFOFJF_00446	CJCKLIFP_00732	IABBECJM_00446	LANDOHOG_00445	LOGCBOHO_00445	DKGFALGN_00730	PNFFMGCL_00445	BJCGHIIB_01209	NHHDDJBG_01915	LBLHELLM_02081	CGJPMKCI_00741	JOHJONHN_00221	CNEDDIJH_01033	JLJGJGIB_00286
dauR		Transcriptional regulator DauR	102	102	1	1	14570				722	722	722	DGJMBLJC_01798	HFDHOMNF_03641	ALEPGING_03838	GEOGNNEI_03836	BINKDPLB_03573	IPPPMGOG_02230	NCHKEDON_01671	PLMPIJHD_01633	LIBHOFBA_01442	MFAGDJPO_01614	AICMNGMC_01492	JAGDPAPJ_01635	JICHJFDH_03429	AHEHGMLM_01968	PABJNMJP_02620	MAPHOHON_02894	ONDKMJBG_03498	JDGDJJKN_04463	KLMHLHPE_02719	EGICBAEE_03683	LNEFCFII_03680	NILJAHBC_03378	KCIFOFJF_03614	CJCKLIFP_03177	IABBECJM_03220	LANDOHOG_03218	LOGCBOHO_02904	DKGFALGN_03403	PNFFMGCL_02793	BJCGHIIB_02597	NHHDDJBG_02407	LBLHELLM_02357	CGJPMKCI_02395	JOHJONHN_03210	CNEDDIJH_03075	JLJGJGIB_01694
osmW		Osmoprotectant import permease protein OsmW	102	102	1	1	6877				647	647	647	DGJMBLJC_02621	HFDHOMNF_00483	ALEPGING_02094	GEOGNNEI_00736	BINKDPLB_02654	IPPPMGOG_01747	NCHKEDON_00403	PLMPIJHD_00593	LIBHOFBA_00405	MFAGDJPO_00595	AICMNGMC_00595	JAGDPAPJ_00739	JICHJFDH_04417	AHEHGMLM_00392	PABJNMJP_01254	MAPHOHON_00738	ONDKMJBG_01229	JDGDJJKN_00085	KLMHLHPE_00478	EGICBAEE_00340	LNEFCFII_00438	NILJAHBC_00439	KCIFOFJF_00739	CJCKLIFP_00439	IABBECJM_00739	LANDOHOG_00738	LOGCBOHO_00738	DKGFALGN_00438	PNFFMGCL_00736	BJCGHIIB_00213	NHHDDJBG_00456	LBLHELLM_00889	CGJPMKCI_00437	JOHJONHN_00514	CNEDDIJH_00290	JLJGJGIB_02028
bdm		Protein bdm	102	102	1	1	7080				215	215	215	DGJMBLJC_04237	HFDHOMNF_00564	ALEPGING_02072	GEOGNNEI_00659	BINKDPLB_02731	IPPPMGOG_01670	NCHKEDON_00480	PLMPIJHD_00518	LIBHOFBA_00327	MFAGDJPO_00518	AICMNGMC_00518	JAGDPAPJ_00662	JICHJFDH_00651	AHEHGMLM_00469	PABJNMJP_01177	MAPHOHON_00661	ONDKMJBG_01306	JDGDJJKN_00009	KLMHLHPE_00401	EGICBAEE_00263	LNEFCFII_00515	NILJAHBC_00516	KCIFOFJF_00662	CJCKLIFP_00516	IABBECJM_00662	LANDOHOG_00661	LOGCBOHO_00661	DKGFALGN_00515	PNFFMGCL_00659	BJCGHIIB_00137	NHHDDJBG_01518	LBLHELLM_01879	CGJPMKCI_00527	JOHJONHN_00436	CNEDDIJH_00367	JLJGJGIB_00072
yebC		putative transcriptional regulatory protein YebC	102	102	1	1	8958				740	743	740	DGJMBLJC_03109	HFDHOMNF_00916	ALEPGING_04277	GEOGNNEI_00322	BINKDPLB_03240	IPPPMGOG_02441	NCHKEDON_03983	PLMPIJHD_00180	LIBHOFBA_03433	MFAGDJPO_00180	AICMNGMC_00180	JAGDPAPJ_00323	JICHJFDH_00315	AHEHGMLM_00808	PABJNMJP_00839	MAPHOHON_00323	ONDKMJBG_01643	JDGDJJKN_01894	KLMHLHPE_00064	EGICBAEE_02219	LNEFCFII_00852	NILJAHBC_00854	KCIFOFJF_00323	CJCKLIFP_00854	IABBECJM_00323	LANDOHOG_00322	LOGCBOHO_00322	DKGFALGN_00852	PNFFMGCL_00322	BJCGHIIB_01331	NHHDDJBG_02037	LBLHELLM_01958	CGJPMKCI_00863	JOHJONHN_00098	CNEDDIJH_01154	JLJGJGIB_00408
ygdR_4		putative lipoprotein YgdR	102	102	1	1	1883				227	227	227	DGJMBLJC_03319	HFDHOMNF_03904	ALEPGING_03286	GEOGNNEI_01455	BINKDPLB_00216	IPPPMGOG_03346	NCHKEDON_01731	PLMPIJHD_01249	LIBHOFBA_01059	MFAGDJPO_03227	AICMNGMC_01250	JAGDPAPJ_01393	JICHJFDH_03230	AHEHGMLM_03975	PABJNMJP_00236	MAPHOHON_02107	ONDKMJBG_00750	JDGDJJKN_01427	KLMHLHPE_01151	EGICBAEE_00808	LNEFCFII_01434	NILJAHBC_02078	KCIFOFJF_01793	CJCKLIFP_02221	IABBECJM_01435	LANDOHOG_01386	LOGCBOHO_01386	DKGFALGN_01410	PNFFMGCL_01468	BJCGHIIB_00945	NHHDDJBG_00216	LBLHELLM_00217	CGJPMKCI_01107	JOHJONHN_00861	CNEDDIJH_00771	JLJGJGIB_00721
prfB_1		Peptide chain release factor RF2	102	102	1	1	1749				881	881	881	DGJMBLJC_03383	HFDHOMNF_03828	ALEPGING_03463	GEOGNNEI_01524	BINKDPLB_00285	IPPPMGOG_03993	NCHKEDON_01800	PLMPIJHD_01318	LIBHOFBA_01128	MFAGDJPO_03296	AICMNGMC_01319	JAGDPAPJ_01462	JICHJFDH_01884	AHEHGMLM_03906	PABJNMJP_00167	MAPHOHON_02038	ONDKMJBG_02681	JDGDJJKN_01371	KLMHLHPE_01082	EGICBAEE_00739	LNEFCFII_01503	NILJAHBC_02147	KCIFOFJF_01724	CJCKLIFP_02290	IABBECJM_01504	LANDOHOG_01317	LOGCBOHO_01317	DKGFALGN_01341	PNFFMGCL_01399	BJCGHIIB_00876	NHHDDJBG_00285	LBLHELLM_00286	CGJPMKCI_01038	JOHJONHN_00792	CNEDDIJH_00840	JLJGJGIB_00790
flgB		Flagellar basal body rod protein FlgB	102	102	1	1	5894				416	416	416	DGJMBLJC_03964	HFDHOMNF_00139	ALEPGING_02202	GEOGNNEI_01052	BINKDPLB_04246	IPPPMGOG_02063	NCHKEDON_00087	PLMPIJHD_00909	LIBHOFBA_00721	MFAGDJPO_00911	AICMNGMC_00912	JAGDPAPJ_01055	JICHJFDH_01253	AHEHGMLM_01603	PABJNMJP_01570	MAPHOHON_01054	ONDKMJBG_00913	JDGDJJKN_00398	KLMHLHPE_00794	EGICBAEE_02925	LNEFCFII_00122	NILJAHBC_00122	KCIFOFJF_01056	CJCKLIFP_00122	IABBECJM_01056	LANDOHOG_01055	LOGCBOHO_01055	DKGFALGN_00122	PNFFMGCL_01112	BJCGHIIB_00589	NHHDDJBG_03018	LBLHELLM_00573	CGJPMKCI_00121	JOHJONHN_01198	CNEDDIJH_02559	JLJGJGIB_02711
glnQ_3		Glutamine transport ATP-binding protein GlnQ	102	102	1	1	5238				719	722	721	DGJMBLJC_01272	HFDHOMNF_01418	ALEPGING_03596	GEOGNNEI_04362	BINKDPLB_01505	IPPPMGOG_03482	NCHKEDON_01512	PLMPIJHD_04473	LIBHOFBA_04556	MFAGDJPO_04492	AICMNGMC_04281	JAGDPAPJ_04466	JICHJFDH_00780	AHEHGMLM_02165	PABJNMJP_01748	MAPHOHON_03511	ONDKMJBG_04324	JDGDJJKN_00641	KLMHLHPE_03402	EGICBAEE_03556	LNEFCFII_03412	NILJAHBC_03576	KCIFOFJF_03361	CJCKLIFP_03685	IABBECJM_03728	LANDOHOG_03699	LOGCBOHO_03583	DKGFALGN_03267	PNFFMGCL_03873	BJCGHIIB_04046	NHHDDJBG_03479	LBLHELLM_03738	CGJPMKCI_03923	JOHJONHN_03565	CNEDDIJH_03086	JLJGJGIB_02555
group_18678	ygdR_5	putative lipoprotein YgdR	102	102	1	1	11001				230	230	230	DGJMBLJC_04653	HFDHOMNF_02503	ALEPGING_03647	GEOGNNEI_03214	BINKDPLB_00490	IPPPMGOG_00090	NCHKEDON_01211	PLMPIJHD_03457	LIBHOFBA_03232	MFAGDJPO_02557	AICMNGMC_03478	JAGDPAPJ_03475	JICHJFDH_01516	AHEHGMLM_00168	PABJNMJP_04442	MAPHOHON_01700	ONDKMJBG_00363	JDGDJJKN_02364	KLMHLHPE_01644	EGICBAEE_01660	LNEFCFII_02263	NILJAHBC_01648	KCIFOFJF_01412	CJCKLIFP_01771	IABBECJM_02301	LANDOHOG_02300	LOGCBOHO_01878	DKGFALGN_01860	PNFFMGCL_02057	BJCGHIIB_01678	NHHDDJBG_01422	LBLHELLM_01364	CGJPMKCI_01668	JOHJONHN_01787	CNEDDIJH_01277	JLJGJGIB_01136
rsxA		Electron transport complex subunit RsxA	102	102	1	1	6772				581	581	581	DGJMBLJC_02656	HFDHOMNF_00446	ALEPGING_02127	GEOGNNEI_00769	BINKDPLB_02000	IPPPMGOG_01780	NCHKEDON_00370	PLMPIJHD_00626	LIBHOFBA_00438	MFAGDJPO_00628	AICMNGMC_00628	JAGDPAPJ_00772	JICHJFDH_04384	AHEHGMLM_00359	PABJNMJP_01287	MAPHOHON_00771	ONDKMJBG_01196	JDGDJJKN_00118	KLMHLHPE_00511	EGICBAEE_00373	LNEFCFII_00405	NILJAHBC_00406	KCIFOFJF_00772	CJCKLIFP_00406	IABBECJM_00772	LANDOHOG_00771	LOGCBOHO_00771	DKGFALGN_00405	PNFFMGCL_00769	BJCGHIIB_00246	NHHDDJBG_00489	LBLHELLM_00856	CGJPMKCI_00404	JOHJONHN_00547	CNEDDIJH_00257	JLJGJGIB_02061
tdh		L-threonine 3-dehydrogenase	102	102	1	1	14118				1025	1025	1025	DGJMBLJC_02075	HFDHOMNF_04044	ALEPGING_02849	GEOGNNEI_03722	BINKDPLB_04021	IPPPMGOG_02755	NCHKEDON_02473	PLMPIJHD_04002	LIBHOFBA_04087	MFAGDJPO_03812	AICMNGMC_02428	JAGDPAPJ_04002	JICHJFDH_01034	AHEHGMLM_01456	PABJNMJP_03606	MAPHOHON_02796	ONDKMJBG_04093	JDGDJJKN_03270	KLMHLHPE_02462	EGICBAEE_03138	LNEFCFII_02833	NILJAHBC_03122	KCIFOFJF_02926	CJCKLIFP_03079	IABBECJM_03122	LANDOHOG_03120	LOGCBOHO_02806	DKGFALGN_02647	PNFFMGCL_02538	BJCGHIIB_02342	NHHDDJBG_02152	LBLHELLM_02250	CGJPMKCI_02857	JOHJONHN_02528	CNEDDIJH_02249	JLJGJGIB_02459
ftsQ		Cell division protein FtsQ	102	102	1	1	10929				830	830	830	DGJMBLJC_04705	HFDHOMNF_02556	ALEPGING_01870	GEOGNNEI_03264	BINKDPLB_00540	IPPPMGOG_00140	NCHKEDON_01161	PLMPIJHD_03507	LIBHOFBA_03282	MFAGDJPO_02607	AICMNGMC_03528	JAGDPAPJ_03525	JICHJFDH_01465	AHEHGMLM_00118	PABJNMJP_04492	MAPHOHON_01750	ONDKMJBG_00413	JDGDJJKN_02313	KLMHLHPE_01694	EGICBAEE_01610	LNEFCFII_02213	NILJAHBC_01698	KCIFOFJF_01462	CJCKLIFP_01721	IABBECJM_02351	LANDOHOG_02350	LOGCBOHO_01928	DKGFALGN_01910	PNFFMGCL_02107	BJCGHIIB_01728	NHHDDJBG_01372	LBLHELLM_01414	CGJPMKCI_01718	JOHJONHN_01737	CNEDDIJH_01327	JLJGJGIB_01186
phoP		Virulence transcriptional regulatory protein PhoP	102	102	1	1	5984				674	674	674	DGJMBLJC_03902	HFDHOMNF_00198	ALEPGING_03160	GEOGNNEI_00996	BINKDPLB_03536	IPPPMGOG_02007	NCHKEDON_00143	PLMPIJHD_00853	LIBHOFBA_00665	MFAGDJPO_00855	AICMNGMC_00856	JAGDPAPJ_00999	JICHJFDH_01309	AHEHGMLM_01547	PABJNMJP_01514	MAPHOHON_00998	ONDKMJBG_00969	JDGDJJKN_00341	KLMHLHPE_00738	EGICBAEE_02869	LNEFCFII_00178	NILJAHBC_00179	KCIFOFJF_00999	CJCKLIFP_00179	IABBECJM_00999	LANDOHOG_00998	LOGCBOHO_00998	DKGFALGN_00178	PNFFMGCL_01056	BJCGHIIB_00533	NHHDDJBG_00716	LBLHELLM_00629	CGJPMKCI_00177	JOHJONHN_01254	CNEDDIJH_00030	JLJGJGIB_03003
uvrB		UvrABC system protein B	102	102	1	1	5173				2021	2021	2021	DGJMBLJC_02424	HFDHOMNF_02215	ALEPGING_02483	GEOGNNEI_02277	BINKDPLB_02452	IPPPMGOG_02160	NCHKEDON_01992	PLMPIJHD_02868	LIBHOFBA_02680	MFAGDJPO_02298	AICMNGMC_01792	JAGDPAPJ_02439	JICHJFDH_01800	AHEHGMLM_04376	PABJNMJP_03098	MAPHOHON_04433	ONDKMJBG_02351	JDGDJJKN_00669	KLMHLHPE_04294	EGICBAEE_04331	LNEFCFII_04362	NILJAHBC_04397	KCIFOFJF_04306	CJCKLIFP_04403	IABBECJM_04446	LANDOHOG_04393	LOGCBOHO_04441	DKGFALGN_04361	PNFFMGCL_03957	BJCGHIIB_04130	NHHDDJBG_03945	LBLHELLM_03766	CGJPMKCI_03951	JOHJONHN_04238	CNEDDIJH_04133	JLJGJGIB_03815
pgk		Phosphoglycerate kinase	102	102	1	1	1707				1163	1163	1163	DGJMBLJC_03415	HFDHOMNF_03798	ALEPGING_01585	GEOGNNEI_01552	BINKDPLB_00313	IPPPMGOG_04021	NCHKEDON_01828	PLMPIJHD_01346	LIBHOFBA_01156	MFAGDJPO_03324	AICMNGMC_01347	JAGDPAPJ_01490	JICHJFDH_01856	AHEHGMLM_03878	PABJNMJP_00139	MAPHOHON_02010	ONDKMJBG_02709	JDGDJJKN_01342	KLMHLHPE_01054	EGICBAEE_00711	LNEFCFII_01531	NILJAHBC_02176	KCIFOFJF_01695	CJCKLIFP_02319	IABBECJM_01533	LANDOHOG_01288	LOGCBOHO_01288	DKGFALGN_01313	PNFFMGCL_01371	BJCGHIIB_00848	NHHDDJBG_00313	LBLHELLM_00314	CGJPMKCI_01010	JOHJONHN_00764	CNEDDIJH_00868	JLJGJGIB_00818
djlA		Co-chaperone protein DjlA	102	102	1	1	10985				809	812	811	DGJMBLJC_04666	HFDHOMNF_02516	ALEPGING_01775	GEOGNNEI_03227	BINKDPLB_00503	IPPPMGOG_00103	NCHKEDON_01198	PLMPIJHD_03470	LIBHOFBA_03245	MFAGDJPO_02570	AICMNGMC_03491	JAGDPAPJ_03488	JICHJFDH_01503	AHEHGMLM_00155	PABJNMJP_04455	MAPHOHON_01713	ONDKMJBG_00376	JDGDJJKN_02351	KLMHLHPE_01657	EGICBAEE_01647	LNEFCFII_02250	NILJAHBC_01661	KCIFOFJF_01425	CJCKLIFP_01758	IABBECJM_02314	LANDOHOG_02313	LOGCBOHO_01891	DKGFALGN_01873	PNFFMGCL_02070	BJCGHIIB_01691	NHHDDJBG_01409	LBLHELLM_01377	CGJPMKCI_01681	JOHJONHN_01774	CNEDDIJH_01290	JLJGJGIB_01149
bamD		Outer membrane protein assembly factor BamD	102	102	1	1	874				737	737	737	DGJMBLJC_01408	HFDHOMNF_03283	ALEPGING_01399	GEOGNNEI_02306	BINKDPLB_03031	IPPPMGOG_01196	NCHKEDON_02688	PLMPIJHD_02897	LIBHOFBA_02709	MFAGDJPO_02678	AICMNGMC_02962	JAGDPAPJ_02897	JICHJFDH_00004	AHEHGMLM_04102	PABJNMJP_02688	MAPHOHON_02360	ONDKMJBG_04654	JDGDJJKN_01686	KLMHLHPE_01405	EGICBAEE_01063	LNEFCFII_01179	NILJAHBC_01824	KCIFOFJF_04416	CJCKLIFP_04431	IABBECJM_01182	LANDOHOG_01639	LOGCBOHO_01639	DKGFALGN_04202	PNFFMGCL_04042	BJCGHIIB_01201	NHHDDJBG_04166	LBLHELLM_03914	CGJPMKCI_03985	JOHJONHN_04312	CNEDDIJH_04200	JLJGJGIB_03850
yfcD		putative Nudix hydrolase YfcD	102	102	1	1	10046				554	554	554	DGJMBLJC_02292	HFDHOMNF_04607	ALEPGING_02245	GEOGNNEI_02532	BINKDPLB_00899	IPPPMGOG_00711	NCHKEDON_00708	PLMPIJHD_02508	LIBHOFBA_02319	MFAGDJPO_01128	AICMNGMC_02628	JAGDPAPJ_02563	JICHJFDH_03173	AHEHGMLM_01224	PABJNMJP_03811	MAPHOHON_02603	ONDKMJBG_02941	JDGDJJKN_02831	KLMHLHPE_03003	EGICBAEE_01160	LNEFCFII_01763	NILJAHBC_02616	KCIFOFJF_02506	CJCKLIFP_01271	IABBECJM_01973	LANDOHOG_01737	LOGCBOHO_02378	DKGFALGN_03183	PNFFMGCL_01940	BJCGHIIB_03147	NHHDDJBG_02814	LBLHELLM_02923	CGJPMKCI_03122	JOHJONHN_01955	CNEDDIJH_02483	JLJGJGIB_03183
modB		Molybdenum transport system permease protein ModB	102	102	1	1	5140				689	689	689	DGJMBLJC_02442	HFDHOMNF_02232	ALEPGING_02904	GEOGNNEI_02261	BINKDPLB_02436	IPPPMGOG_00597	NCHKEDON_02008	PLMPIJHD_02852	LIBHOFBA_02664	MFAGDJPO_02282	AICMNGMC_01776	JAGDPAPJ_02423	JICHJFDH_01784	AHEHGMLM_04392	PABJNMJP_03114	MAPHOHON_04417	ONDKMJBG_02367	JDGDJJKN_00685	KLMHLHPE_04310	EGICBAEE_04315	LNEFCFII_04378	NILJAHBC_04381	KCIFOFJF_04322	CJCKLIFP_04387	IABBECJM_04430	LANDOHOG_04377	LOGCBOHO_04457	DKGFALGN_04582	PNFFMGCL_03973	BJCGHIIB_04146	NHHDDJBG_03929	LBLHELLM_03782	CGJPMKCI_03967	JOHJONHN_04254	CNEDDIJH_04117	JLJGJGIB_03831
fliN		Flagellar motor switch protein FliN	102	102	1	1	9099				413	413	413	DGJMBLJC_03022	HFDHOMNF_00995	ALEPGING_04030	GEOGNNEI_00248	BINKDPLB_03314	IPPPMGOG_02515	NCHKEDON_04057	PLMPIJHD_00106	LIBHOFBA_03507	MFAGDJPO_00106	AICMNGMC_00106	JAGDPAPJ_00249	JICHJFDH_02248	AHEHGMLM_00882	PABJNMJP_03230	MAPHOHON_00249	ONDKMJBG_01717	JDGDJJKN_01819	KLMHLHPE_01894	EGICBAEE_02145	LNEFCFII_00926	NILJAHBC_00928	KCIFOFJF_00249	CJCKLIFP_00928	IABBECJM_00249	LANDOHOG_00248	LOGCBOHO_00248	DKGFALGN_00926	PNFFMGCL_00248	BJCGHIIB_01405	NHHDDJBG_01011	LBLHELLM_03343	CGJPMKCI_01395	JOHJONHN_00024	CNEDDIJH_01228	JLJGJGIB_00482
group_18714		hypothetical protein	102	102	1	1	13113				422	422	422	DGJMBLJC_03550	HFDHOMNF_03659	ALEPGING_00249	GEOGNNEI_01680	BINKDPLB_02353	IPPPMGOG_04149	NCHKEDON_01956	PLMPIJHD_01474	LIBHOFBA_01284	MFAGDJPO_03452	AICMNGMC_01475	JAGDPAPJ_01618	JICHJFDH_02985	AHEHGMLM_04272	PABJNMJP_00011	MAPHOHON_01882	ONDKMJBG_02836	JDGDJJKN_01229	KLMHLHPE_00926	EGICBAEE_00583	LNEFCFII_01659	NILJAHBC_04554	KCIFOFJF_04560	CJCKLIFP_04558	IABBECJM_04551	LANDOHOG_04556	LOGCBOHO_04559	DKGFALGN_01185	PNFFMGCL_01243	BJCGHIIB_00720	NHHDDJBG_00441	LBLHELLM_00442	CGJPMKCI_00882	JOHJONHN_00636	CNEDDIJH_00996	JLJGJGIB_04093
slyX		Protein SlyX	102	102	1	1	14568				218	218	218	DGJMBLJC_01800	HFDHOMNF_03639	ALEPGING_03836	GEOGNNEI_03838	BINKDPLB_03575	IPPPMGOG_02232	NCHKEDON_01673	PLMPIJHD_01635	LIBHOFBA_01444	MFAGDJPO_01616	AICMNGMC_01494	JAGDPAPJ_01637	JICHJFDH_03427	AHEHGMLM_01970	PABJNMJP_02622	MAPHOHON_02896	ONDKMJBG_03500	JDGDJJKN_04461	KLMHLHPE_02717	EGICBAEE_03681	LNEFCFII_03678	NILJAHBC_03376	KCIFOFJF_03612	CJCKLIFP_03179	IABBECJM_03222	LANDOHOG_03220	LOGCBOHO_02906	DKGFALGN_03405	PNFFMGCL_02791	BJCGHIIB_02595	NHHDDJBG_02405	LBLHELLM_02359	CGJPMKCI_02393	JOHJONHN_03208	CNEDDIJH_03073	JLJGJGIB_01696
group_18716		hypothetical protein	102	102	1	1	10129				284	284	284	DGJMBLJC_02244	HFDHOMNF_04562	ALEPGING_03777	GEOGNNEI_02576	BINKDPLB_00943	IPPPMGOG_00667	NCHKEDON_00753	PLMPIJHD_02553	LIBHOFBA_02364	MFAGDJPO_01173	AICMNGMC_02673	JAGDPAPJ_02608	JICHJFDH_03217	AHEHGMLM_01268	PABJNMJP_03855	MAPHOHON_02559	ONDKMJBG_02985	JDGDJJKN_02873	KLMHLHPE_02959	EGICBAEE_01205	LNEFCFII_01808	NILJAHBC_02572	KCIFOFJF_02462	CJCKLIFP_01315	IABBECJM_01929	LANDOHOG_01781	LOGCBOHO_02334	DKGFALGN_03227	PNFFMGCL_01896	BJCGHIIB_03103	NHHDDJBG_02858	LBLHELLM_02967	CGJPMKCI_03078	JOHJONHN_01911	CNEDDIJH_02439	JLJGJGIB_03139
matP		Macrodomain Ter protein	102	102	1	1	5675				452	452	452	DGJMBLJC_02934	HFDHOMNF_00025	ALEPGING_03970	GEOGNNEI_01154	BINKDPLB_04143	IPPPMGOG_04246	NCHKEDON_02802	PLMPIJHD_01012	LIBHOFBA_00824	MFAGDJPO_01014	AICMNGMC_01015	JAGDPAPJ_01158	JICHJFDH_02829	AHEHGMLM_01707	PABJNMJP_01674	MAPHOHON_01158	ONDKMJBG_00809	JDGDJJKN_00504	KLMHLHPE_00897	EGICBAEE_03028	LNEFCFII_00019	NILJAHBC_00019	KCIFOFJF_01159	CJCKLIFP_00019	IABBECJM_01159	LANDOHOG_01158	LOGCBOHO_01158	DKGFALGN_00019	PNFFMGCL_01214	BJCGHIIB_00691	NHHDDJBG_03121	LBLHELLM_00471	CGJPMKCI_00019	JOHJONHN_01095	CNEDDIJH_02662	JLJGJGIB_02814
ybhQ		Inner membrane protein YbhQ	102	102	1	1	5195				410	410	410	DGJMBLJC_02408	HFDHOMNF_02200	ALEPGING_02498	GEOGNNEI_02292	BINKDPLB_02467	IPPPMGOG_02145	NCHKEDON_01977	PLMPIJHD_02883	LIBHOFBA_02695	MFAGDJPO_02313	AICMNGMC_01807	JAGDPAPJ_02454	JICHJFDH_01815	AHEHGMLM_04361	PABJNMJP_03083	MAPHOHON_04448	ONDKMJBG_02336	JDGDJJKN_00654	KLMHLHPE_04279	EGICBAEE_04346	LNEFCFII_04347	NILJAHBC_04412	KCIFOFJF_04291	CJCKLIFP_04418	IABBECJM_04461	LANDOHOG_04408	LOGCBOHO_04426	DKGFALGN_04346	PNFFMGCL_03942	BJCGHIIB_04115	NHHDDJBG_03960	LBLHELLM_03751	CGJPMKCI_03936	JOHJONHN_04223	CNEDDIJH_04148	JLJGJGIB_03800
gnd		6-phosphogluconate dehydrogenase, decarboxylating	102	102	1	1	9489				1406	1406	1406	DGJMBLJC_04411	HFDHOMNF_01105	ALEPGING_04353	GEOGNNEI_00145	BINKDPLB_02941	IPPPMGOG_02618	NCHKEDON_04160	PLMPIJHD_00003	LIBHOFBA_03610	MFAGDJPO_00003	AICMNGMC_00003	JAGDPAPJ_00146	JICHJFDH_01624	AHEHGMLM_00985	PABJNMJP_03333	MAPHOHON_00146	ONDKMJBG_01820	JDGDJJKN_01698	KLMHLHPE_01997	EGICBAEE_02042	LNEFCFII_01029	NILJAHBC_01031	KCIFOFJF_00146	CJCKLIFP_01031	IABBECJM_00146	LANDOHOG_00145	LOGCBOHO_00145	DKGFALGN_01029	PNFFMGCL_00145	BJCGHIIB_01508	NHHDDJBG_00908	LBLHELLM_03240	CGJPMKCI_01498	JOHJONHN_01547	CNEDDIJH_03785	JLJGJGIB_01041
group_18720		hypothetical protein	102	102	1	1	16176				206	206	206	DGJMBLJC_00260	HFDHOMNF_02136	ALEPGING_00349	GEOGNNEI_03410	BINKDPLB_04317	IPPPMGOG_02863	NCHKEDON_04408	PLMPIJHD_03684	LIBHOFBA_03774	MFAGDJPO_03494	AICMNGMC_03684	JAGDPAPJ_03685	JICHJFDH_02768	AHEHGMLM_01741	PABJNMJP_00670	MAPHOHON_01397	ONDKMJBG_02108	JDGDJJKN_02639	KLMHLHPE_03563	EGICBAEE_02622	LNEFCFII_02513	NILJAHBC_01397	KCIFOFJF_02819	CJCKLIFP_02758	IABBECJM_03006	LANDOHOG_03004	LOGCBOHO_02486	DKGFALGN_03090	PNFFMGCL_03397	BJCGHIIB_03990	NHHDDJBG_03862	LBLHELLM_03662	CGJPMKCI_03811	JOHJONHN_04107	CNEDDIJH_03930	JLJGJGIB_03656
nagB		Glucosamine-6-phosphate deaminase	102	102	1	1	4986				800	800	800	DGJMBLJC_01100	HFDHOMNF_03151	ALEPGING_00005	GEOGNNEI_04118	BINKDPLB_03873	IPPPMGOG_03163	NCHKEDON_04638	PLMPIJHD_04228	LIBHOFBA_04311	MFAGDJPO_04103	AICMNGMC_04031	JAGDPAPJ_04222	JICHJFDH_02965	AHEHGMLM_00238	PABJNMJP_02845	MAPHOHON_03675	ONDKMJBG_03693	JDGDJJKN_00771	KLMHLHPE_02796	EGICBAEE_03308	LNEFCFII_03043	NILJAHBC_03454	KCIFOFJF_03096	CJCKLIFP_03411	IABBECJM_03502	LANDOHOG_03500	LOGCBOHO_03138	DKGFALGN_02865	PNFFMGCL_03625	BJCGHIIB_02721	NHHDDJBG_03379	LBLHELLM_01624	CGJPMKCI_02639	JOHJONHN_03443	CNEDDIJH_04100	JLJGJGIB_03734
cyoB		Cytochrome bo(3) ubiquinol oxidase subunit 1	102	102	1	1	440				1991	1991	1991	DGJMBLJC_04878	HFDHOMNF_01689	ALEPGING_00546	GEOGNNEI_01803	BINKDPLB_01745	IPPPMGOG_00464	NCHKEDON_03035	PLMPIJHD_01596	LIBHOFBA_01406	MFAGDJPO_01577	AICMNGMC_04654	JAGDPAPJ_04708	JICHJFDH_02634	AHEHGMLM_03612	PABJNMJP_02005	MAPHOHON_03627	ONDKMJBG_04358	JDGDJJKN_03706	KLMHLHPE_03436	EGICBAEE_02406	LNEFCFII_03446	NILJAHBC_02821	KCIFOFJF_02119	CJCKLIFP_02631	IABBECJM_02673	LANDOHOG_02583	LOGCBOHO_03742	DKGFALGN_02232	PNFFMGCL_03132	BJCGHIIB_03349	NHHDDJBG_02897	LBLHELLM_03085	CGJPMKCI_03243	JOHJONHN_02818	CNEDDIJH_02922	JLJGJGIB_02944
cmpR		HTH-type transcriptional activator CmpR	102	102	1	1	9745				863	863	863	DGJMBLJC_03701	HFDHOMNF_01530	ALEPGING_03526	GEOGNNEI_00034	BINKDPLB_00771	IPPPMGOG_01517	NCHKEDON_02284	PLMPIJHD_04700	LIBHOFBA_03721	MFAGDJPO_04453	AICMNGMC_04509	JAGDPAPJ_00035	JICHJFDH_01735	AHEHGMLM_01096	PABJNMJP_03444	MAPHOHON_00035	ONDKMJBG_01931	JDGDJJKN_04091	KLMHLHPE_02108	EGICBAEE_01930	LNEFCFII_01140	NILJAHBC_01142	KCIFOFJF_00035	CJCKLIFP_01142	IABBECJM_00035	LANDOHOG_00034	LOGCBOHO_00034	DKGFALGN_01140	PNFFMGCL_00034	BJCGHIIB_01619	NHHDDJBG_00797	LBLHELLM_03987	CGJPMKCI_01609	JOHJONHN_01436	CNEDDIJH_02777	JLJGJGIB_00930
cspD		Cold shock-like protein CspD	102	102	1	1	5373				221	221	221	DGJMBLJC_01186	HFDHOMNF_01332	ALEPGING_03086	GEOGNNEI_04441	BINKDPLB_01584	IPPPMGOG_03403	NCHKEDON_01591	PLMPIJHD_04552	LIBHOFBA_04635	MFAGDJPO_04571	AICMNGMC_04360	JAGDPAPJ_04545	JICHJFDH_00859	AHEHGMLM_02244	PABJNMJP_01827	MAPHOHON_03432	ONDKMJBG_04245	JDGDJJKN_00572	KLMHLHPE_03323	EGICBAEE_03476	LNEFCFII_03333	NILJAHBC_03655	KCIFOFJF_03440	CJCKLIFP_03764	IABBECJM_03807	LANDOHOG_03620	LOGCBOHO_03662	DKGFALGN_03346	PNFFMGCL_04152	BJCGHIIB_03711	NHHDDJBG_03400	LBLHELLM_04068	CGJPMKCI_03713	JOHJONHN_03644	CNEDDIJH_03166	JLJGJGIB_02634
malK		Maltose/maltodextrin import ATP-binding protein MalK	102	102	1	1	15774				1109	1109	1109	DGJMBLJC_00569	HFDHOMNF_04199	ALEPGING_01780	GEOGNNEI_03583	BINKDPLB_01470	IPPPMGOG_03912	NCHKEDON_04235	PLMPIJHD_03857	LIBHOFBA_03947	MFAGDJPO_03667	AICMNGMC_03857	JAGDPAPJ_03858	JICHJFDH_04141	AHEHGMLM_01914	PABJNMJP_00498	MAPHOHON_01224	ONDKMJBG_02280	JDGDJJKN_03803	KLMHLHPE_03858	EGICBAEE_02794	LNEFCFII_02685	NILJAHBC_01224	KCIFOFJF_02646	CJCKLIFP_02931	IABBECJM_02832	LANDOHOG_02831	LOGCBOHO_02658	DKGFALGN_04054	PNFFMGCL_03675	BJCGHIIB_03560	NHHDDJBG_02533	LBLHELLM_02641	CGJPMKCI_02521	JOHJONHN_03264	CNEDDIJH_01958	JLJGJGIB_01976
sthA		Soluble pyridine nucleotide transhydrogenase	102	102	1	1	15626				1400	1400	1400	DGJMBLJC_00787	HFDHOMNF_01726	ALEPGING_01515	GEOGNNEI_02952	BINKDPLB_03521	IPPPMGOG_00006	NCHKEDON_04180	PLMPIJHD_03648	LIBHOFBA_02992	MFAGDJPO_03006	AICMNGMC_03222	JAGDPAPJ_03235	JICHJFDH_03783	AHEHGMLM_04057	PABJNMJP_03488	MAPHOHON_04686	ONDKMJBG_04593	JDGDJJKN_03892	KLMHLHPE_04500	EGICBAEE_04592	LNEFCFII_04630	NILJAHBC_04297	KCIFOFJF_04150	CJCKLIFP_04242	IABBECJM_04346	LANDOHOG_04293	LOGCBOHO_04345	DKGFALGN_04625	PNFFMGCL_04366	BJCGHIIB_04374	NHHDDJBG_04363	LBLHELLM_04271	CGJPMKCI_04343	JOHJONHN_04583	CNEDDIJH_04596	JLJGJGIB_04295
yibN		putative protein YibN	102	102	1	1	14126				431	431	431	DGJMBLJC_02069	HFDHOMNF_04036	ALEPGING_02855	GEOGNNEI_03716	BINKDPLB_04015	IPPPMGOG_02761	NCHKEDON_02467	PLMPIJHD_03996	LIBHOFBA_04081	MFAGDJPO_03806	AICMNGMC_02422	JAGDPAPJ_03996	JICHJFDH_01040	AHEHGMLM_01462	PABJNMJP_03612	MAPHOHON_02802	ONDKMJBG_04087	JDGDJJKN_03275	KLMHLHPE_02468	EGICBAEE_03132	LNEFCFII_02839	NILJAHBC_03128	KCIFOFJF_02920	CJCKLIFP_03085	IABBECJM_03128	LANDOHOG_03126	LOGCBOHO_02812	DKGFALGN_02641	PNFFMGCL_02544	BJCGHIIB_02348	NHHDDJBG_02158	LBLHELLM_02244	CGJPMKCI_02863	JOHJONHN_02534	CNEDDIJH_02255	JLJGJGIB_02465
group_18728		hypothetical protein	102	102	1	1	6088				248	248	248	DGJMBLJC_03859	HFDHOMNF_00240	ALEPGING_01175	GEOGNNEI_00955	BINKDPLB_02172	IPPPMGOG_01966	NCHKEDON_00184	PLMPIJHD_00812	LIBHOFBA_00624	MFAGDJPO_00814	AICMNGMC_00815	JAGDPAPJ_00958	JICHJFDH_04198	AHEHGMLM_02883	PABJNMJP_01473	MAPHOHON_00957	ONDKMJBG_01010	JDGDJJKN_00301	KLMHLHPE_00697	EGICBAEE_00559	LNEFCFII_00219	NILJAHBC_00220	KCIFOFJF_00958	CJCKLIFP_00220	IABBECJM_00958	LANDOHOG_00957	LOGCBOHO_00957	DKGFALGN_00219	PNFFMGCL_01015	BJCGHIIB_00492	NHHDDJBG_00675	LBLHELLM_00670	CGJPMKCI_00218	JOHJONHN_01295	CNEDDIJH_00071	JLJGJGIB_03044
cspE		Cold shock-like protein CspE	102	102	1	1	4914				209	209	209	DGJMBLJC_01043	HFDHOMNF_03206	ALEPGING_00058	GEOGNNEI_04063	BINKDPLB_03818	IPPPMGOG_03108	NCHKEDON_04583	PLMPIJHD_04173	LIBHOFBA_04256	MFAGDJPO_04048	AICMNGMC_03976	JAGDPAPJ_04167	JICHJFDH_02911	AHEHGMLM_00293	PABJNMJP_02790	MAPHOHON_03730	ONDKMJBG_03748	JDGDJJKN_00826	KLMHLHPE_02851	EGICBAEE_03363	LNEFCFII_02988	NILJAHBC_03509	KCIFOFJF_03151	CJCKLIFP_03466	IABBECJM_03447	LANDOHOG_03445	LOGCBOHO_03193	DKGFALGN_02810	PNFFMGCL_03570	BJCGHIIB_02666	NHHDDJBG_03324	LBLHELLM_01679	CGJPMKCI_02694	JOHJONHN_03389	CNEDDIJH_04045	JLJGJGIB_03788
dsbA		Thiol:disulfide interchange protein DsbA	102	102	1	1	15355				623	623	623	DGJMBLJC_00922	HFDHOMNF_01860	ALEPGING_02962	GEOGNNEI_01938	BINKDPLB_01596	IPPPMGOG_03707	NCHKEDON_02122	PLMPIJHD_02072	LIBHOFBA_01880	MFAGDJPO_01939	AICMNGMC_01913	JAGDPAPJ_02072	JICHJFDH_04029	AHEHGMLM_02591	PABJNMJP_02978	MAPHOHON_03887	ONDKMJBG_02478	JDGDJJKN_04019	KLMHLHPE_03696	EGICBAEE_03916	LNEFCFII_04028	NILJAHBC_04045	KCIFOFJF_04054	CJCKLIFP_04054	IABBECJM_04097	LANDOHOG_04044	LOGCBOHO_04092	DKGFALGN_03632	PNFFMGCL_03098	BJCGHIIB_02937	NHHDDJBG_03144	LBLHELLM_03233	CGJPMKCI_03473	JOHJONHN_02934	CNEDDIJH_03402	JLJGJGIB_03236
secB		Protein-export protein SecB	102	102	1	1	14128				467	467	467	DGJMBLJC_02067	HFDHOMNF_04034	ALEPGING_02857	GEOGNNEI_03714	BINKDPLB_04013	IPPPMGOG_02763	NCHKEDON_02465	PLMPIJHD_03994	LIBHOFBA_04079	MFAGDJPO_03804	AICMNGMC_02420	JAGDPAPJ_03994	JICHJFDH_01042	AHEHGMLM_01464	PABJNMJP_03614	MAPHOHON_02804	ONDKMJBG_04085	JDGDJJKN_03277	KLMHLHPE_02470	EGICBAEE_03130	LNEFCFII_02841	NILJAHBC_03130	KCIFOFJF_02918	CJCKLIFP_03087	IABBECJM_03130	LANDOHOG_03128	LOGCBOHO_02814	DKGFALGN_02639	PNFFMGCL_02546	BJCGHIIB_02350	NHHDDJBG_02160	LBLHELLM_02242	CGJPMKCI_02865	JOHJONHN_02536	CNEDDIJH_02257	JLJGJGIB_02467
group_18732		hypothetical protein	102	102	1	1	16137				275	275	275	DGJMBLJC_00289	HFDHOMNF_02165	ALEPGING_00376	GEOGNNEI_03437	BINKDPLB_04344	IPPPMGOG_02890	NCHKEDON_04381	PLMPIJHD_03711	LIBHOFBA_03801	MFAGDJPO_03521	AICMNGMC_03711	JAGDPAPJ_03712	JICHJFDH_02741	AHEHGMLM_01768	PABJNMJP_00643	MAPHOHON_01370	ONDKMJBG_02135	JDGDJJKN_02666	KLMHLHPE_03590	EGICBAEE_02649	LNEFCFII_02540	NILJAHBC_01370	KCIFOFJF_02792	CJCKLIFP_02785	IABBECJM_02979	LANDOHOG_02977	LOGCBOHO_02513	DKGFALGN_03063	PNFFMGCL_03424	BJCGHIIB_04017	NHHDDJBG_03889	LBLHELLM_03635	CGJPMKCI_03838	JOHJONHN_04134	CNEDDIJH_03957	JLJGJGIB_03629
suhB		Inositol-1-monophosphatase	102	102	1	1	10620				803	803	803	DGJMBLJC_00977	HFDHOMNF_02952	ALEPGING_00862	GEOGNNEI_02814	BINKDPLB_01942	IPPPMGOG_01423	NCHKEDON_00982	PLMPIJHD_02782	LIBHOFBA_02594	MFAGDJPO_01402	AICMNGMC_02902	JAGDPAPJ_02837	JICHJFDH_03516	AHEHGMLM_02124	PABJNMJP_04085	MAPHOHON_03848	ONDKMJBG_03217	JDGDJJKN_03112	KLMHLHPE_02306	EGICBAEE_01433	LNEFCFII_02036	NILJAHBC_02343	KCIFOFJF_03269	CJCKLIFP_01544	IABBECJM_01700	LANDOHOG_02010	LOGCBOHO_02105	DKGFALGN_02500	PNFFMGCL_01738	BJCGHIIB_01976	NHHDDJBG_01782	LBLHELLM_00949	CGJPMKCI_01895	JOHJONHN_02103	CNEDDIJH_01575	JLJGJGIB_01363
sdhC		Succinate dehydrogenase cytochrome b556 subunit	102	102	1	1	5066				404	404	404	DGJMBLJC_01140	HFDHOMNF_03113	ALEPGING_00532	GEOGNNEI_04152	BINKDPLB_03907	IPPPMGOG_03197	NCHKEDON_04672	PLMPIJHD_04263	LIBHOFBA_04346	MFAGDJPO_04138	AICMNGMC_04066	JAGDPAPJ_04256	JICHJFDH_00753	AHEHGMLM_03666	PABJNMJP_02879	MAPHOHON_04472	ONDKMJBG_03659	JDGDJJKN_00736	KLMHLHPE_02762	EGICBAEE_03274	LNEFCFII_03077	NILJAHBC_03420	KCIFOFJF_03062	CJCKLIFP_03377	IABBECJM_03536	LANDOHOG_03534	LOGCBOHO_03104	DKGFALGN_02899	PNFFMGCL_04006	BJCGHIIB_02755	NHHDDJBG_03988	LBLHELLM_03827	CGJPMKCI_02605	JOHJONHN_04060	CNEDDIJH_03751	JLJGJGIB_03921
cspA		Cold shock protein CspA	102	102	1	1	14234				212	212	212	DGJMBLJC_02013	HFDHOMNF_03975	ALEPGING_00392	GEOGNNEI_03658	BINKDPLB_03957	IPPPMGOG_02819	NCHKEDON_02409	PLMPIJHD_03938	LIBHOFBA_04023	MFAGDJPO_03748	AICMNGMC_02364	JAGDPAPJ_03937	JICHJFDH_01098	AHEHGMLM_02322	PABJNMJP_03670	MAPHOHON_02860	ONDKMJBG_04029	JDGDJJKN_03328	KLMHLHPE_02527	EGICBAEE_03074	LNEFCFII_02897	NILJAHBC_03186	KCIFOFJF_02862	CJCKLIFP_03143	IABBECJM_03186	LANDOHOG_03184	LOGCBOHO_02870	DKGFALGN_02583	PNFFMGCL_02602	BJCGHIIB_02406	NHHDDJBG_02216	LBLHELLM_02186	CGJPMKCI_02921	JOHJONHN_02592	CNEDDIJH_02313	JLJGJGIB_02523
group_18737		hypothetical protein	102	102	1	1	10032				494	494	494	DGJMBLJC_02305	HFDHOMNF_04618	ALEPGING_00702	GEOGNNEI_02521	BINKDPLB_00888	IPPPMGOG_00722	NCHKEDON_00697	PLMPIJHD_02497	LIBHOFBA_02308	MFAGDJPO_01117	AICMNGMC_02617	JAGDPAPJ_02552	JICHJFDH_03162	AHEHGMLM_01213	PABJNMJP_03800	MAPHOHON_02614	ONDKMJBG_02930	JDGDJJKN_02820	KLMHLHPE_03014	EGICBAEE_01149	LNEFCFII_01752	NILJAHBC_02627	KCIFOFJF_02517	CJCKLIFP_01260	IABBECJM_01984	LANDOHOG_01726	LOGCBOHO_02389	DKGFALGN_03172	PNFFMGCL_01951	BJCGHIIB_03158	NHHDDJBG_02803	LBLHELLM_02912	CGJPMKCI_03133	JOHJONHN_01966	CNEDDIJH_02494	JLJGJGIB_03194
menB		1,4-dihydroxy-2-naphthoyl-CoA synthase	102	102	1	1	9989				857	857	857	DGJMBLJC_02340	HFDHOMNF_04650	ALEPGING_00660	GEOGNNEI_02493	BINKDPLB_00860	IPPPMGOG_00750	NCHKEDON_00669	PLMPIJHD_02469	LIBHOFBA_02280	MFAGDJPO_01089	AICMNGMC_02589	JAGDPAPJ_02524	JICHJFDH_03134	AHEHGMLM_01184	PABJNMJP_03771	MAPHOHON_02643	ONDKMJBG_02901	JDGDJJKN_02792	KLMHLHPE_03042	EGICBAEE_01121	LNEFCFII_01724	NILJAHBC_02655	KCIFOFJF_02545	CJCKLIFP_01232	IABBECJM_02012	LANDOHOG_01698	LOGCBOHO_02417	DKGFALGN_03144	PNFFMGCL_01979	BJCGHIIB_03186	NHHDDJBG_02775	LBLHELLM_02884	CGJPMKCI_03161	JOHJONHN_01994	CNEDDIJH_02522	JLJGJGIB_03222
uspA		Universal stress protein A	102	102	1	1	14343				434	434	434	DGJMBLJC_01948	HFDHOMNF_01900	ALEPGING_01473	GEOGNNEI_03966	BINKDPLB_03703	IPPPMGOG_04516	NCHKEDON_03383	PLMPIJHD_02970	LIBHOFBA_02782	MFAGDJPO_02751	AICMNGMC_03035	JAGDPAPJ_02970	JICHJFDH_03298	AHEHGMLM_02756	PABJNMJP_02459	MAPHOHON_03025	ONDKMJBG_02085	JDGDJJKN_03388	KLMHLHPE_02589	EGICBAEE_04388	LNEFCFII_04426	NILJAHBC_03247	KCIFOFJF_04343	CJCKLIFP_03308	IABBECJM_03351	LANDOHOG_03349	LOGCBOHO_03035	DKGFALGN_04240	PNFFMGCL_02663	BJCGHIIB_02467	NHHDDJBG_02277	LBLHELLM_02487	CGJPMKCI_02265	JOHJONHN_04275	CNEDDIJH_04190	JLJGJGIB_01824
cheW		Chemotaxis protein CheW	102	102	1	1	8993				503	503	503	DGJMBLJC_03080	HFDHOMNF_00939	ALEPGING_02008	GEOGNNEI_00301	BINKDPLB_03261	IPPPMGOG_02462	NCHKEDON_04004	PLMPIJHD_00159	LIBHOFBA_03454	MFAGDJPO_00159	AICMNGMC_00159	JAGDPAPJ_00302	JICHJFDH_02301	AHEHGMLM_00829	PABJNMJP_00818	MAPHOHON_00302	ONDKMJBG_01664	JDGDJJKN_01872	KLMHLHPE_01841	EGICBAEE_02198	LNEFCFII_00873	NILJAHBC_00875	KCIFOFJF_00302	CJCKLIFP_00875	IABBECJM_00302	LANDOHOG_00301	LOGCBOHO_00301	DKGFALGN_00873	PNFFMGCL_00301	BJCGHIIB_01352	NHHDDJBG_03704	LBLHELLM_03882	CGJPMKCI_01342	JOHJONHN_00077	CNEDDIJH_01175	JLJGJGIB_00429
group_18741		hypothetical protein	102	102	1	1	5478				548	548	548	DGJMBLJC_02846	HFDHOMNF_01274	ALEPGING_03740	GEOGNNEI_04490	BINKDPLB_03025	IPPPMGOG_02133	NCHKEDON_03039	PLMPIJHD_04601	LIBHOFBA_04684	MFAGDJPO_04620	AICMNGMC_04409	JAGDPAPJ_04594	JICHJFDH_00909	AHEHGMLM_02294	PABJNMJP_01878	MAPHOHON_03382	ONDKMJBG_04195	JDGDJJKN_00524	KLMHLHPE_03274	EGICBAEE_03427	LNEFCFII_03284	NILJAHBC_03704	KCIFOFJF_03489	CJCKLIFP_03813	IABBECJM_03856	LANDOHOG_03571	LOGCBOHO_03711	DKGFALGN_03395	PNFFMGCL_04241	BJCGHIIB_03760	NHHDDJBG_04212	LBLHELLM_04116	CGJPMKCI_03664	JOHJONHN_04445	CNEDDIJH_04431	JLJGJGIB_02683
ptsH_1		Phosphocarrier protein HPr	102	102	1	1	10373				257	257	257	DGJMBLJC_02194	HFDHOMNF_03075	ALEPGING_02147	GEOGNNEI_02700	BINKDPLB_01828	IPPPMGOG_00914	NCHKEDON_00868	PLMPIJHD_02668	LIBHOFBA_02480	MFAGDJPO_01288	AICMNGMC_02788	JAGDPAPJ_02723	JICHJFDH_02374	AHEHGMLM_02843	PABJNMJP_03970	MAPHOHON_02444	ONDKMJBG_03101	JDGDJJKN_02990	KLMHLHPE_02192	EGICBAEE_01319	LNEFCFII_01922	NILJAHBC_02458	KCIFOFJF_02348	CJCKLIFP_01429	IABBECJM_01815	LANDOHOG_01895	LOGCBOHO_02220	DKGFALGN_02386	PNFFMGCL_01852	BJCGHIIB_01862	NHHDDJBG_01668	LBLHELLM_01063	CGJPMKCI_02009	JOHJONHN_02217	CNEDDIJH_01461	JLJGJGIB_01477
surE		5'/3'-nucleotidase SurE	102	102	1	1	2015				761	761	761	DGJMBLJC_01394	HFDHOMNF_03537	ALEPGING_00732	GEOGNNEI_01397	BINKDPLB_00158	IPPPMGOG_00999	NCHKEDON_01299	PLMPIJHD_01191	LIBHOFBA_01001	MFAGDJPO_03169	AICMNGMC_01192	JAGDPAPJ_01335	JICHJFDH_00201	AHEHGMLM_02465	PABJNMJP_00293	MAPHOHON_02164	ONDKMJBG_00692	JDGDJJKN_01491	KLMHLHPE_01209	EGICBAEE_00865	LNEFCFII_01375	NILJAHBC_02020	KCIFOFJF_01851	CJCKLIFP_02163	IABBECJM_01378	LANDOHOG_01443	LOGCBOHO_01443	DKGFALGN_01468	PNFFMGCL_01525	BJCGHIIB_01003	NHHDDJBG_00158	LBLHELLM_00159	CGJPMKCI_01165	JOHJONHN_00919	CNEDDIJH_00713	JLJGJGIB_00663
asd		Aspartate-semialdehyde dehydrogenase	102	102	1	1	14445				1106	1106	1106	DGJMBLJC_01893	HFDHOMNF_03550	ALEPGING_01752	GEOGNNEI_03915	BINKDPLB_03652	IPPPMGOG_04567	NCHKEDON_03334	PLMPIJHD_01712	LIBHOFBA_01521	MFAGDJPO_01693	AICMNGMC_01571	JAGDPAPJ_01714	JICHJFDH_03349	AHEHGMLM_03447	PABJNMJP_04678	MAPHOHON_02973	ONDKMJBG_03577	JDGDJJKN_03440	KLMHLHPE_02640	EGICBAEE_03604	LNEFCFII_03601	NILJAHBC_03299	KCIFOFJF_03535	CJCKLIFP_03256	IABBECJM_03299	LANDOHOG_03297	LOGCBOHO_02983	DKGFALGN_03482	PNFFMGCL_02714	BJCGHIIB_02518	NHHDDJBG_02328	LBLHELLM_02436	CGJPMKCI_02316	JOHJONHN_03131	CNEDDIJH_02996	JLJGJGIB_01773
mdoG		Glucans biosynthesis protein G	102	102	1	1	5860				1535	1553	1552	DGJMBLJC_03992	HFDHOMNF_00113	ALEPGING_03199	GEOGNNEI_01076	BINKDPLB_04222	IPPPMGOG_04325	NCHKEDON_02881	PLMPIJHD_00933	LIBHOFBA_00745	MFAGDJPO_00935	AICMNGMC_00936	JAGDPAPJ_01079	JICHJFDH_01229	AHEHGMLM_01627	PABJNMJP_01594	MAPHOHON_01078	ONDKMJBG_00889	JDGDJJKN_00422	KLMHLHPE_00818	EGICBAEE_02949	LNEFCFII_00098	NILJAHBC_00098	KCIFOFJF_01080	CJCKLIFP_00098	IABBECJM_01080	LANDOHOG_01079	LOGCBOHO_01079	DKGFALGN_00098	PNFFMGCL_01136	BJCGHIIB_00613	NHHDDJBG_03042	LBLHELLM_00549	CGJPMKCI_00097	JOHJONHN_01174	CNEDDIJH_02583	JLJGJGIB_02735
ptsO		Phosphocarrier protein NPr	102	102	1	1	13469				272	272	272	DGJMBLJC_01531	HFDHOMNF_01245	ALEPGING_00943	GEOGNNEI_02374	BINKDPLB_02562	IPPPMGOG_00036	NCHKEDON_01265	PLMPIJHD_03002	LIBHOFBA_02814	MFAGDJPO_02783	AICMNGMC_03067	JAGDPAPJ_03002	JICHJFDH_03687	AHEHGMLM_04188	PABJNMJP_02329	MAPHOHON_03257	ONDKMJBG_04564	JDGDJJKN_01056	KLMHLHPE_04353	EGICBAEE_04420	LNEFCFII_04453	NILJAHBC_04449	KCIFOFJF_04444	CJCKLIFP_03652	IABBECJM_03695	LANDOHOG_04445	LOGCBOHO_03550	DKGFALGN_04272	PNFFMGCL_04110	BJCGHIIB_04188	NHHDDJBG_04048	LBLHELLM_04026	CGJPMKCI_04052	JOHJONHN_04379	CNEDDIJH_04306	JLJGJGIB_04112
mreC		Cell shape-determining protein MreC	102	102	1	1	13522				1052	1055	1052	DGJMBLJC_02594	HFDHOMNF_02721	ALEPGING_03031	GEOGNNEI_02418	BINKDPLB_02850	IPPPMGOG_01226	NCHKEDON_03648	PLMPIJHD_03046	LIBHOFBA_02858	MFAGDJPO_02827	AICMNGMC_01740	JAGDPAPJ_03101	JICHJFDH_02110	AHEHGMLM_04029	PABJNMJP_02935	MAPHOHON_04529	ONDKMJBG_03839	JDGDJJKN_01007	KLMHLHPE_04397	EGICBAEE_04464	LNEFCFII_04502	NILJAHBC_04493	KCIFOFJF_04493	CJCKLIFP_04491	IABBECJM_04491	LANDOHOG_04489	LOGCBOHO_04492	DKGFALGN_04316	PNFFMGCL_04190	BJCGHIIB_04228	NHHDDJBG_04189	LBLHELLM_04139	CGJPMKCI_04095	JOHJONHN_04424	CNEDDIJH_04410	JLJGJGIB_04001
rpmB		50S ribosomal protein L28	102	102	1	1	14088				236	236	236	DGJMBLJC_02096	HFDHOMNF_04064	ALEPGING_03612	GEOGNNEI_03742	BINKDPLB_04041	IPPPMGOG_02735	NCHKEDON_02493	PLMPIJHD_04022	LIBHOFBA_04107	MFAGDJPO_03832	AICMNGMC_02448	JAGDPAPJ_04022	JICHJFDH_01014	AHEHGMLM_01436	PABJNMJP_03586	MAPHOHON_02776	ONDKMJBG_04113	JDGDJJKN_03250	KLMHLHPE_02442	EGICBAEE_03158	LNEFCFII_02813	NILJAHBC_03102	KCIFOFJF_02946	CJCKLIFP_03059	IABBECJM_03102	LANDOHOG_03100	LOGCBOHO_02786	DKGFALGN_02667	PNFFMGCL_02518	BJCGHIIB_02322	NHHDDJBG_02132	LBLHELLM_02270	CGJPMKCI_02837	JOHJONHN_02508	CNEDDIJH_02229	JLJGJGIB_02439
pykA		Pyruvate kinase II	102	102	1	1	8918				1442	1442	1442	DGJMBLJC_03120	HFDHOMNF_00904	ALEPGING_04265	GEOGNNEI_00334	BINKDPLB_03228	IPPPMGOG_02429	NCHKEDON_03971	PLMPIJHD_00192	LIBHOFBA_00001	MFAGDJPO_00192	AICMNGMC_00192	JAGDPAPJ_00335	JICHJFDH_00326	AHEHGMLM_00796	PABJNMJP_00851	MAPHOHON_00335	ONDKMJBG_01631	JDGDJJKN_01905	KLMHLHPE_00076	EGICBAEE_02231	LNEFCFII_00840	NILJAHBC_00842	KCIFOFJF_00335	CJCKLIFP_00842	IABBECJM_00335	LANDOHOG_00334	LOGCBOHO_00334	DKGFALGN_00840	PNFFMGCL_00334	BJCGHIIB_01319	NHHDDJBG_02025	LBLHELLM_01970	CGJPMKCI_00851	JOHJONHN_00110	CNEDDIJH_01143	JLJGJGIB_00396
fabA		3-hydroxydecanoyl-[acyl-carrier-protein] dehydratase	102	102	1	1	5673				518	518	518	DGJMBLJC_02932	HFDHOMNF_00023	ALEPGING_03972	GEOGNNEI_01156	BINKDPLB_04141	IPPPMGOG_04244	NCHKEDON_02800	PLMPIJHD_01014	LIBHOFBA_00826	MFAGDJPO_01016	AICMNGMC_01017	JAGDPAPJ_01160	JICHJFDH_02831	AHEHGMLM_01709	PABJNMJP_01676	MAPHOHON_01160	ONDKMJBG_00807	JDGDJJKN_00506	KLMHLHPE_00899	EGICBAEE_03030	LNEFCFII_00017	NILJAHBC_00017	KCIFOFJF_01161	CJCKLIFP_00017	IABBECJM_01161	LANDOHOG_01160	LOGCBOHO_01160	DKGFALGN_00017	PNFFMGCL_01216	BJCGHIIB_00693	NHHDDJBG_03123	LBLHELLM_00469	CGJPMKCI_00017	JOHJONHN_01093	CNEDDIJH_02664	JLJGJGIB_02816
hemH		Ferrochelatase	102	102	1	1	368				962	962	962	DGJMBLJC_00753	HFDHOMNF_01638	ALEPGING_02668	GEOGNNEI_01755	BINKDPLB_01698	IPPPMGOG_00512	NCHKEDON_02988	PLMPIJHD_01549	LIBHOFBA_01359	MFAGDJPO_01530	AICMNGMC_04607	JAGDPAPJ_04660	JICHJFDH_00242	AHEHGMLM_03565	PABJNMJP_01958	MAPHOHON_03580	ONDKMJBG_04405	JDGDJJKN_03751	KLMHLHPE_03484	EGICBAEE_02359	LNEFCFII_03493	NILJAHBC_02774	KCIFOFJF_02073	CJCKLIFP_02678	IABBECJM_02720	LANDOHOG_02536	LOGCBOHO_03789	DKGFALGN_02279	PNFFMGCL_03179	BJCGHIIB_03302	NHHDDJBG_02945	LBLHELLM_03037	CGJPMKCI_03291	JOHJONHN_02865	CNEDDIJH_02875	JLJGJGIB_02897
dcd		dCTP deaminase	102	102	1	1	9582				581	581	581	DGJMBLJC_04464	HFDHOMNF_01444	ALEPGING_01051	GEOGNNEI_00114	BINKDPLB_00691	IPPPMGOG_02637	NCHKEDON_02364	PLMPIJHD_04620	LIBHOFBA_03641	MFAGDJPO_04373	AICMNGMC_04428	JAGDPAPJ_00115	JICHJFDH_01655	AHEHGMLM_01016	PABJNMJP_03364	MAPHOHON_00115	ONDKMJBG_01851	JDGDJJKN_04252	KLMHLHPE_02028	EGICBAEE_02010	LNEFCFII_01060	NILJAHBC_01062	KCIFOFJF_00115	CJCKLIFP_01062	IABBECJM_00115	LANDOHOG_00114	LOGCBOHO_00114	DKGFALGN_01060	PNFFMGCL_00114	BJCGHIIB_01539	NHHDDJBG_00877	LBLHELLM_01552	CGJPMKCI_01529	JOHJONHN_01516	CNEDDIJH_02697	JLJGJGIB_01010
folD		Bifunctional protein FolD protein	102	102	1	1	294				866	866	866	DGJMBLJC_00697	HFDHOMNF_01582	ALEPGING_00482	GEOGNNEI_01703	BINKDPLB_02376	IPPPMGOG_00564	NCHKEDON_02936	PLMPIJHD_01497	LIBHOFBA_01307	MFAGDJPO_01478	AICMNGMC_04555	JAGDPAPJ_04608	JICHJFDH_00294	AHEHGMLM_03513	PABJNMJP_01906	MAPHOHON_03528	ONDKMJBG_04457	JDGDJJKN_00913	KLMHLHPE_03536	EGICBAEE_02307	LNEFCFII_03545	NILJAHBC_02722	KCIFOFJF_02021	CJCKLIFP_02730	IABBECJM_02772	LANDOHOG_02484	LOGCBOHO_03841	DKGFALGN_02331	PNFFMGCL_03231	BJCGHIIB_03250	NHHDDJBG_02997	LBLHELLM_02985	CGJPMKCI_03343	JOHJONHN_02917	CNEDDIJH_02823	JLJGJGIB_02845
group_18754		hypothetical protein	102	102	1	1	4849				197	197	197	DGJMBLJC_00644	HFDHOMNF_03235	ALEPGING_00086	GEOGNNEI_04035	BINKDPLB_03790	IPPPMGOG_03080	NCHKEDON_04555	PLMPIJHD_04145	LIBHOFBA_04228	MFAGDJPO_04020	AICMNGMC_03948	JAGDPAPJ_04139	JICHJFDH_02883	AHEHGMLM_00321	PABJNMJP_02762	MAPHOHON_03758	ONDKMJBG_03776	JDGDJJKN_00854	KLMHLHPE_02879	EGICBAEE_03391	LNEFCFII_02960	NILJAHBC_03537	KCIFOFJF_03179	CJCKLIFP_03494	IABBECJM_03419	LANDOHOG_03417	LOGCBOHO_03221	DKGFALGN_02782	PNFFMGCL_03542	BJCGHIIB_02638	NHHDDJBG_03296	LBLHELLM_01707	CGJPMKCI_02722	JOHJONHN_03361	CNEDDIJH_04007	JLJGJGIB_03706
gyrA		DNA gyrase subunit A	102	102	1	1	9937				2636	2636	2636	DGJMBLJC_02377	HFDHOMNF_04686	ALEPGING_03654	GEOGNNEI_02458	BINKDPLB_00825	IPPPMGOG_00785	NCHKEDON_00634	PLMPIJHD_02434	LIBHOFBA_02245	MFAGDJPO_01054	AICMNGMC_02554	JAGDPAPJ_02489	JICHJFDH_03098	AHEHGMLM_01149	PABJNMJP_03736	MAPHOHON_02678	ONDKMJBG_02866	JDGDJJKN_02757	KLMHLHPE_03077	EGICBAEE_01086	LNEFCFII_01689	NILJAHBC_02690	KCIFOFJF_02580	CJCKLIFP_01197	IABBECJM_02047	LANDOHOG_01663	LOGCBOHO_02452	DKGFALGN_03109	PNFFMGCL_02014	BJCGHIIB_03221	NHHDDJBG_02740	LBLHELLM_02849	CGJPMKCI_03196	JOHJONHN_02029	CNEDDIJH_04257	JLJGJGIB_03962
frr		Ribosome-recycling factor	102	102	1	1	10757				557	557	557	DGJMBLJC_04810	HFDHOMNF_02665	ALEPGING_00270	GEOGNNEI_03356	BINKDPLB_00632	IPPPMGOG_00232	NCHKEDON_01069	PLMPIJHD_03599	LIBHOFBA_03374	MFAGDJPO_02235	AICMNGMC_03620	JAGDPAPJ_03617	JICHJFDH_01373	AHEHGMLM_00026	PABJNMJP_04584	MAPHOHON_01842	ONDKMJBG_00505	JDGDJJKN_04299	KLMHLHPE_01786	EGICBAEE_01518	LNEFCFII_02121	NILJAHBC_01790	KCIFOFJF_01554	CJCKLIFP_01629	IABBECJM_02443	LANDOHOG_02442	LOGCBOHO_02020	DKGFALGN_02002	PNFFMGCL_02199	BJCGHIIB_01820	NHHDDJBG_01280	LBLHELLM_01506	CGJPMKCI_01810	JOHJONHN_01645	CNEDDIJH_01419	JLJGJGIB_01278
galK		Galactokinase	102	102	1	1	5131				1148	1148	1148	DGJMBLJC_02451	HFDHOMNF_02240	ALEPGING_02912	GEOGNNEI_02253	BINKDPLB_02428	IPPPMGOG_00589	NCHKEDON_02016	PLMPIJHD_02844	LIBHOFBA_02656	MFAGDJPO_02274	AICMNGMC_01768	JAGDPAPJ_02415	JICHJFDH_01776	AHEHGMLM_04400	PABJNMJP_03122	MAPHOHON_04409	ONDKMJBG_02375	JDGDJJKN_00693	KLMHLHPE_04318	EGICBAEE_04307	LNEFCFII_04386	NILJAHBC_04373	KCIFOFJF_04330	CJCKLIFP_04379	IABBECJM_04422	LANDOHOG_04369	LOGCBOHO_04465	DKGFALGN_04590	PNFFMGCL_03981	BJCGHIIB_04154	NHHDDJBG_03921	LBLHELLM_03790	CGJPMKCI_03975	JOHJONHN_04262	CNEDDIJH_04109	JLJGJGIB_03839
lldD		L-lactate dehydrogenase	102	102	1	1	14139				1190	1190	1190	DGJMBLJC_02060	HFDHOMNF_04026	ALEPGING_02864	GEOGNNEI_03707	BINKDPLB_04006	IPPPMGOG_02770	NCHKEDON_02458	PLMPIJHD_03987	LIBHOFBA_04072	MFAGDJPO_03797	AICMNGMC_02413	JAGDPAPJ_03987	JICHJFDH_01049	AHEHGMLM_01471	PABJNMJP_03621	MAPHOHON_02811	ONDKMJBG_04078	JDGDJJKN_03284	KLMHLHPE_02477	EGICBAEE_03123	LNEFCFII_02848	NILJAHBC_03137	KCIFOFJF_02911	CJCKLIFP_03094	IABBECJM_03137	LANDOHOG_03135	LOGCBOHO_02821	DKGFALGN_02632	PNFFMGCL_02553	BJCGHIIB_02357	NHHDDJBG_02167	LBLHELLM_02235	CGJPMKCI_02872	JOHJONHN_02543	CNEDDIJH_02264	JLJGJGIB_02474
eda		KHG/KDPG aldolase	102	102	1	1	8910				641	641	641	DGJMBLJC_03127	HFDHOMNF_00899	ALEPGING_04261	GEOGNNEI_00338	BINKDPLB_03224	IPPPMGOG_02425	NCHKEDON_03967	PLMPIJHD_00196	LIBHOFBA_00005	MFAGDJPO_00196	AICMNGMC_00196	JAGDPAPJ_00339	JICHJFDH_00330	AHEHGMLM_00792	PABJNMJP_00855	MAPHOHON_00339	ONDKMJBG_01627	JDGDJJKN_01909	KLMHLHPE_00080	EGICBAEE_02235	LNEFCFII_00836	NILJAHBC_00838	KCIFOFJF_00339	CJCKLIFP_00838	IABBECJM_00339	LANDOHOG_00338	LOGCBOHO_00338	DKGFALGN_00836	PNFFMGCL_00338	BJCGHIIB_01315	NHHDDJBG_02021	LBLHELLM_01974	CGJPMKCI_00847	JOHJONHN_00114	CNEDDIJH_01139	JLJGJGIB_00392
ruvA		Holliday junction ATP-dependent DNA helicase RuvA	102	102	1	1	8935				458	779	616	DGJMBLJC_03113	HFDHOMNF_00911	ALEPGING_04272	GEOGNNEI_00327	BINKDPLB_03235	IPPPMGOG_02436	NCHKEDON_03978	PLMPIJHD_00185	LIBHOFBA_03428	MFAGDJPO_00185	AICMNGMC_00185	JAGDPAPJ_00328	JICHJFDH_00319	AHEHGMLM_00803	PABJNMJP_00844	MAPHOHON_00328	ONDKMJBG_01638	JDGDJJKN_01898	KLMHLHPE_00069	EGICBAEE_02224	LNEFCFII_00847	NILJAHBC_00849	KCIFOFJF_00328	CJCKLIFP_00849	IABBECJM_00328	LANDOHOG_00327	LOGCBOHO_00327	DKGFALGN_00847	PNFFMGCL_00327	BJCGHIIB_01326	NHHDDJBG_02032	LBLHELLM_01963	CGJPMKCI_00858	JOHJONHN_00103	CNEDDIJH_01149	JLJGJGIB_00403
can		Carbonic anhydrase 2	102	102	1	1	10850				662	662	662	DGJMBLJC_04754	HFDHOMNF_02609	ALEPGING_01913	GEOGNNEI_03307	BINKDPLB_00583	IPPPMGOG_00183	NCHKEDON_01118	PLMPIJHD_03550	LIBHOFBA_03325	MFAGDJPO_02650	AICMNGMC_03571	JAGDPAPJ_03568	JICHJFDH_01422	AHEHGMLM_00075	PABJNMJP_04535	MAPHOHON_01793	ONDKMJBG_00456	JDGDJJKN_02266	KLMHLHPE_01737	EGICBAEE_01567	LNEFCFII_02170	NILJAHBC_01741	KCIFOFJF_01505	CJCKLIFP_01678	IABBECJM_02394	LANDOHOG_02393	LOGCBOHO_01971	DKGFALGN_01953	PNFFMGCL_02150	BJCGHIIB_01771	NHHDDJBG_01329	LBLHELLM_01457	CGJPMKCI_01761	JOHJONHN_01694	CNEDDIJH_01370	JLJGJGIB_01229
groL		60 kDa chaperonin	102	102	1	1	16072				1637	1664	1646	DGJMBLJC_00336	HFDHOMNF_04317	ALEPGING_01959	GEOGNNEI_03484	BINKDPLB_04391	IPPPMGOG_02937	NCHKEDON_04334	PLMPIJHD_03758	LIBHOFBA_03848	MFAGDJPO_03568	AICMNGMC_03758	JAGDPAPJ_03759	JICHJFDH_02693	AHEHGMLM_01815	PABJNMJP_00596	MAPHOHON_01323	ONDKMJBG_02182	JDGDJJKN_02712	KLMHLHPE_03637	EGICBAEE_02696	LNEFCFII_02587	NILJAHBC_01323	KCIFOFJF_02745	CJCKLIFP_02832	IABBECJM_02932	LANDOHOG_02930	LOGCBOHO_02560	DKGFALGN_03016	PNFFMGCL_03472	BJCGHIIB_03817	NHHDDJBG_02434	LBLHELLM_02541	CGJPMKCI_02422	JOHJONHN_04195	CNEDDIJH_01859	JLJGJGIB_01877
btuD_3		Vitamin B12 import ATP-binding protein BtuD	102	102	1	1	2125				821	821	821	DGJMBLJC_01321	HFDHOMNF_03466	ALEPGING_00976	GEOGNNEI_01333	BINKDPLB_00094	IPPPMGOG_01063	NCHKEDON_01363	PLMPIJHD_01127	LIBHOFBA_00937	MFAGDJPO_03105	AICMNGMC_01128	JAGDPAPJ_01271	JICHJFDH_00137	AHEHGMLM_02630	PABJNMJP_00357	MAPHOHON_02228	ONDKMJBG_00628	JDGDJJKN_01557	KLMHLHPE_01273	EGICBAEE_00929	LNEFCFII_01311	NILJAHBC_01956	KCIFOFJF_01915	CJCKLIFP_02099	IABBECJM_01314	LANDOHOG_01507	LOGCBOHO_01507	DKGFALGN_01532	PNFFMGCL_01589	BJCGHIIB_01067	NHHDDJBG_00094	LBLHELLM_00095	CGJPMKCI_01229	JOHJONHN_00983	CNEDDIJH_00649	JLJGJGIB_00599
sapF		Peptide transport system ATP-binding protein SapF	102	102	1	1	7335				806	806	806	DGJMBLJC_04078	HFDHOMNF_00703	ALEPGING_03234	GEOGNNEI_00526	BINKDPLB_00987	IPPPMGOG_01537	NCHKEDON_00613	PLMPIJHD_00385	LIBHOFBA_00194	MFAGDJPO_00385	AICMNGMC_00385	JAGDPAPJ_00528	JICHJFDH_00517	AHEHGMLM_00603	PABJNMJP_01044	MAPHOHON_00528	ONDKMJBG_01439	JDGDJJKN_02095	KLMHLHPE_00268	EGICBAEE_00130	LNEFCFII_00648	NILJAHBC_00649	KCIFOFJF_00529	CJCKLIFP_00649	IABBECJM_00529	LANDOHOG_00528	LOGCBOHO_00528	DKGFALGN_00648	PNFFMGCL_00526	BJCGHIIB_00004	NHHDDJBG_01651	LBLHELLM_01746	CGJPMKCI_00660	JOHJONHN_00303	CNEDDIJH_00500	JLJGJGIB_00205
lptC		Lipopolysaccharide export system protein LptC	102	102	1	1	13458				575	575	575	DGJMBLJC_01538	HFDHOMNF_01238	ALEPGING_00950	GEOGNNEI_02381	BINKDPLB_02569	IPPPMGOG_00029	NCHKEDON_01272	PLMPIJHD_03009	LIBHOFBA_02821	MFAGDJPO_02790	AICMNGMC_03074	JAGDPAPJ_03009	JICHJFDH_03680	AHEHGMLM_04195	PABJNMJP_02336	MAPHOHON_03264	ONDKMJBG_04571	JDGDJJKN_01063	KLMHLHPE_04360	EGICBAEE_04427	LNEFCFII_04446	NILJAHBC_04456	KCIFOFJF_04437	CJCKLIFP_03645	IABBECJM_03688	LANDOHOG_04452	LOGCBOHO_03543	DKGFALGN_04279	PNFFMGCL_04117	BJCGHIIB_04195	NHHDDJBG_04055	LBLHELLM_04033	CGJPMKCI_04059	JOHJONHN_04386	CNEDDIJH_04299	JLJGJGIB_04105
kdgR		Transcriptional regulator KdgR	102	102	1	1	7586				791	791	791	DGJMBLJC_03169	HFDHOMNF_00858	ALEPGING_00184	GEOGNNEI_00381	BINKDPLB_03182	IPPPMGOG_02383	NCHKEDON_03925	PLMPIJHD_00239	LIBHOFBA_00048	MFAGDJPO_00239	AICMNGMC_00239	JAGDPAPJ_00382	JICHJFDH_00373	AHEHGMLM_00749	PABJNMJP_00898	MAPHOHON_00382	ONDKMJBG_01585	JDGDJJKN_01950	KLMHLHPE_00123	EGICBAEE_02278	LNEFCFII_00794	NILJAHBC_00796	KCIFOFJF_00382	CJCKLIFP_00796	IABBECJM_00382	LANDOHOG_00381	LOGCBOHO_00381	DKGFALGN_00794	PNFFMGCL_00381	BJCGHIIB_01273	NHHDDJBG_01979	LBLHELLM_02017	CGJPMKCI_00805	JOHJONHN_00157	CNEDDIJH_01097	JLJGJGIB_00350
group_18768		putative protein	102	102	1	1	15690				590	590	590	DGJMBLJC_02761	HFDHOMNF_02767	ALEPGING_01161	GEOGNNEI_02877	BINKDPLB_02981	IPPPMGOG_01352	NCHKEDON_02758	PLMPIJHD_03124	LIBHOFBA_02887	MFAGDJPO_02901	AICMNGMC_03098	JAGDPAPJ_03130	JICHJFDH_03593	AHEHGMLM_03705	PABJNMJP_02702	MAPHOHON_04571	ONDKMJBG_00069	JDGDJJKN_04429	KLMHLHPE_04426	EGICBAEE_04493	LNEFCFII_04545	NILJAHBC_04522	KCIFOFJF_04522	CJCKLIFP_04520	IABBECJM_04519	LANDOHOG_04532	LOGCBOHO_04535	DKGFALGN_04433	PNFFMGCL_04250	BJCGHIIB_04258	NHHDDJBG_04263	LBLHELLM_04177	CGJPMKCI_04124	JOHJONHN_04496	CNEDDIJH_04482	JLJGJGIB_04359
group_18769		hypothetical protein	102	102	1	1	7622				191	191	191	DGJMBLJC_03157	HFDHOMNF_00868	ALEPGING_00173	GEOGNNEI_00370	BINKDPLB_03193	IPPPMGOG_02393	NCHKEDON_03935	PLMPIJHD_00228	LIBHOFBA_00037	MFAGDJPO_00228	AICMNGMC_00228	JAGDPAPJ_00371	JICHJFDH_00362	AHEHGMLM_00759	PABJNMJP_00887	MAPHOHON_00371	ONDKMJBG_01595	JDGDJJKN_01939	KLMHLHPE_00112	EGICBAEE_02267	LNEFCFII_00804	NILJAHBC_00806	KCIFOFJF_00371	CJCKLIFP_00806	IABBECJM_00371	LANDOHOG_00370	LOGCBOHO_00370	DKGFALGN_00804	PNFFMGCL_00370	BJCGHIIB_01283	NHHDDJBG_01989	LBLHELLM_02006	CGJPMKCI_00815	JOHJONHN_00146	CNEDDIJH_01107	JLJGJGIB_00360
hslO		33 kDa chaperonin	102	102	1	1	14502				878	878	878	DGJMBLJC_01845	HFDHOMNF_03590	ALEPGING_01718	GEOGNNEI_03881	BINKDPLB_03618	IPPPMGOG_04601	NCHKEDON_03300	PLMPIJHD_01678	LIBHOFBA_01487	MFAGDJPO_01659	AICMNGMC_01537	JAGDPAPJ_01680	JICHJFDH_03383	AHEHGMLM_03481	PABJNMJP_04644	MAPHOHON_02939	ONDKMJBG_03543	JDGDJJKN_03479	KLMHLHPE_02674	EGICBAEE_03638	LNEFCFII_03635	NILJAHBC_03333	KCIFOFJF_03569	CJCKLIFP_03222	IABBECJM_03265	LANDOHOG_03263	LOGCBOHO_02949	DKGFALGN_03448	PNFFMGCL_02748	BJCGHIIB_02552	NHHDDJBG_02362	LBLHELLM_02402	CGJPMKCI_02350	JOHJONHN_03165	CNEDDIJH_03030	JLJGJGIB_01739
adhP		Alcohol dehydrogenase, propanol-preferring	102	102	1	1	7084				1001	1010	1009	DGJMBLJC_04234	HFDHOMNF_00567	ALEPGING_02430	GEOGNNEI_00656	BINKDPLB_02734	IPPPMGOG_01667	NCHKEDON_00483	PLMPIJHD_00515	LIBHOFBA_00324	MFAGDJPO_00515	AICMNGMC_00515	JAGDPAPJ_00659	JICHJFDH_00648	AHEHGMLM_00472	PABJNMJP_01174	MAPHOHON_00658	ONDKMJBG_01309	JDGDJJKN_00006	KLMHLHPE_00398	EGICBAEE_00260	LNEFCFII_00518	NILJAHBC_00519	KCIFOFJF_00659	CJCKLIFP_00519	IABBECJM_00659	LANDOHOG_00658	LOGCBOHO_00658	DKGFALGN_00518	PNFFMGCL_00656	BJCGHIIB_00134	NHHDDJBG_01521	LBLHELLM_01876	CGJPMKCI_00530	JOHJONHN_00433	CNEDDIJH_00370	JLJGJGIB_00075
mltD		Membrane-bound lytic murein transglycosylase D	102	102	1	1	857				1220	1220	1220	DGJMBLJC_02465	HFDHOMNF_04524	ALEPGING_03865	GEOGNNEI_04195	BINKDPLB_01335	IPPPMGOG_00270	NCHKEDON_03683	PLMPIJHD_04305	LIBHOFBA_04388	MFAGDJPO_04180	AICMNGMC_04113	JAGDPAPJ_04298	JICHJFDH_02469	AHEHGMLM_04153	PABJNMJP_02042	MAPHOHON_03222	ONDKMJBG_02646	JDGDJJKN_03505	KLMHLHPE_03109	EGICBAEE_02600	LNEFCFII_03119	NILJAHBC_03015	KCIFOFJF_02313	CJCKLIFP_02437	IABBECJM_02479	LANDOHOG_02777	LOGCBOHO_03420	DKGFALGN_02038	PNFFMGCL_04323	BJCGHIIB_04345	NHHDDJBG_04333	LBLHELLM_04247	CGJPMKCI_04296	JOHJONHN_02783	CNEDDIJH_02011	JLJGJGIB_02379
gshA		Glutamate--cysteine ligase	102	102	1	1	2176				1556	1556	1556	DGJMBLJC_01497	HFDHOMNF_03421	ALEPGING_02297	GEOGNNEI_01287	BINKDPLB_00048	IPPPMGOG_01108	NCHKEDON_02700	PLMPIJHD_01081	LIBHOFBA_00891	MFAGDJPO_03059	AICMNGMC_01082	JAGDPAPJ_01225	JICHJFDH_00093	AHEHGMLM_02674	PABJNMJP_00403	MAPHOHON_02272	ONDKMJBG_00582	JDGDJJKN_01601	KLMHLHPE_01317	EGICBAEE_00975	LNEFCFII_01267	NILJAHBC_01912	KCIFOFJF_01961	CJCKLIFP_02053	IABBECJM_01270	LANDOHOG_01551	LOGCBOHO_01551	DKGFALGN_01578	PNFFMGCL_01635	BJCGHIIB_01113	NHHDDJBG_00048	LBLHELLM_00049	CGJPMKCI_01273	JOHJONHN_01029	CNEDDIJH_00603	JLJGJGIB_00553
proB		Glutamate 5-kinase	102	102	1	1	632				1103	1103	1103	DGJMBLJC_05021	HFDHOMNF_04438	ALEPGING_02344	GEOGNNEI_04267	BINKDPLB_01408	IPPPMGOG_00343	NCHKEDON_03757	PLMPIJHD_04378	LIBHOFBA_04461	MFAGDJPO_04253	AICMNGMC_04186	JAGDPAPJ_04371	JICHJFDH_02541	AHEHGMLM_03229	PABJNMJP_02115	MAPHOHON_03149	ONDKMJBG_02573	JDGDJJKN_03585	KLMHLHPE_03182	EGICBAEE_02527	LNEFCFII_03192	NILJAHBC_02942	KCIFOFJF_02240	CJCKLIFP_02510	IABBECJM_02552	LANDOHOG_02704	LOGCBOHO_03347	DKGFALGN_02111	PNFFMGCL_02890	BJCGHIIB_02881	NHHDDJBG_02671	LBLHELLM_02740	CGJPMKCI_02982	JOHJONHN_02710	CNEDDIJH_02084	JLJGJGIB_02306
rsxE		Electron transport complex subunit RsxE	102	102	1	1	6767				692	692	692	DGJMBLJC_04620	HFDHOMNF_00441	ALEPGING_04175	GEOGNNEI_00774	BINKDPLB_02005	IPPPMGOG_01785	NCHKEDON_00365	PLMPIJHD_00631	LIBHOFBA_00443	MFAGDJPO_00633	AICMNGMC_00633	JAGDPAPJ_00777	JICHJFDH_04379	AHEHGMLM_03065	PABJNMJP_01292	MAPHOHON_00776	ONDKMJBG_01191	JDGDJJKN_00123	KLMHLHPE_00516	EGICBAEE_00378	LNEFCFII_00400	NILJAHBC_00401	KCIFOFJF_00777	CJCKLIFP_00401	IABBECJM_00777	LANDOHOG_00776	LOGCBOHO_00776	DKGFALGN_00400	PNFFMGCL_00774	BJCGHIIB_00251	NHHDDJBG_00494	LBLHELLM_00851	CGJPMKCI_00399	JOHJONHN_00552	CNEDDIJH_00252	JLJGJGIB_02066
talB		Transaldolase B	102	102	1	1	11185				953	953	953	DGJMBLJC_00054	HFDHOMNF_02424	ALEPGING_02630	GEOGNNEI_03140	BINKDPLB_00416	IPPPMGOG_03282	NCHKEDON_03578	PLMPIJHD_03383	LIBHOFBA_03158	MFAGDJPO_02483	AICMNGMC_03404	JAGDPAPJ_03401	JICHJFDH_02181	AHEHGMLM_03304	PABJNMJP_04368	MAPHOHON_01626	ONDKMJBG_00289	JDGDJJKN_02437	KLMHLHPE_01570	EGICBAEE_01734	LNEFCFII_02337	NILJAHBC_01574	KCIFOFJF_01338	CJCKLIFP_01845	IABBECJM_02227	LANDOHOG_02226	LOGCBOHO_01804	DKGFALGN_01786	PNFFMGCL_02389	BJCGHIIB_02080	NHHDDJBG_01202	LBLHELLM_01165	CGJPMKCI_02070	JOHJONHN_02267	CNEDDIJH_01679	JLJGJGIB_01527
apt		Adenine phosphoribosyltransferase	102	102	1	1	375				551	551	551	DGJMBLJC_00761	HFDHOMNF_01645	ALEPGING_02662	GEOGNNEI_01761	BINKDPLB_01704	IPPPMGOG_00506	NCHKEDON_02994	PLMPIJHD_01555	LIBHOFBA_01365	MFAGDJPO_01536	AICMNGMC_04613	JAGDPAPJ_04666	JICHJFDH_00236	AHEHGMLM_03571	PABJNMJP_01964	MAPHOHON_03586	ONDKMJBG_04399	JDGDJJKN_03745	KLMHLHPE_03478	EGICBAEE_02365	LNEFCFII_03487	NILJAHBC_02780	KCIFOFJF_02079	CJCKLIFP_02672	IABBECJM_02714	LANDOHOG_02542	LOGCBOHO_03783	DKGFALGN_02273	PNFFMGCL_03173	BJCGHIIB_03308	NHHDDJBG_02939	LBLHELLM_03043	CGJPMKCI_03285	JOHJONHN_02859	CNEDDIJH_02881	JLJGJGIB_02903
cysD		Sulfate adenylyltransferase subunit 2	102	102	1	1	2007				908	908	908	DGJMBLJC_01402	HFDHOMNF_03545	ALEPGING_00740	GEOGNNEI_01405	BINKDPLB_00166	IPPPMGOG_00991	NCHKEDON_01291	PLMPIJHD_01199	LIBHOFBA_01009	MFAGDJPO_03177	AICMNGMC_01200	JAGDPAPJ_01343	JICHJFDH_00209	AHEHGMLM_02457	PABJNMJP_00285	MAPHOHON_02156	ONDKMJBG_00700	JDGDJJKN_01483	KLMHLHPE_01201	EGICBAEE_00857	LNEFCFII_01383	NILJAHBC_02028	KCIFOFJF_01843	CJCKLIFP_02171	IABBECJM_01386	LANDOHOG_01435	LOGCBOHO_01435	DKGFALGN_01460	PNFFMGCL_01517	BJCGHIIB_00995	NHHDDJBG_00166	LBLHELLM_00167	CGJPMKCI_01157	JOHJONHN_00911	CNEDDIJH_00721	JLJGJGIB_00671
cheZ		Protein phosphatase CheZ	102	102	1	1	8982				644	647	646	DGJMBLJC_03086	HFDHOMNF_00933	ALEPGING_02013	GEOGNNEI_00306	BINKDPLB_03256	IPPPMGOG_02457	NCHKEDON_03999	PLMPIJHD_00164	LIBHOFBA_03449	MFAGDJPO_00164	AICMNGMC_00164	JAGDPAPJ_00307	JICHJFDH_02306	AHEHGMLM_00824	PABJNMJP_00823	MAPHOHON_00307	ONDKMJBG_01659	JDGDJJKN_01877	KLMHLHPE_01836	EGICBAEE_02203	LNEFCFII_00868	NILJAHBC_00870	KCIFOFJF_00307	CJCKLIFP_00870	IABBECJM_00307	LANDOHOG_00306	LOGCBOHO_00306	DKGFALGN_00868	PNFFMGCL_00306	BJCGHIIB_01347	NHHDDJBG_03709	LBLHELLM_03887	CGJPMKCI_01337	JOHJONHN_00082	CNEDDIJH_01170	JLJGJGIB_00424
rpe_3		Ribulose-phosphate 3-epimerase	102	102	1	1	14525				677	677	677	DGJMBLJC_01829	HFDHOMNF_03605	ALEPGING_01703	GEOGNNEI_03866	BINKDPLB_03603	IPPPMGOG_04616	NCHKEDON_03285	PLMPIJHD_01663	LIBHOFBA_01472	MFAGDJPO_01644	AICMNGMC_01522	JAGDPAPJ_01665	JICHJFDH_03398	AHEHGMLM_03496	PABJNMJP_04629	MAPHOHON_02924	ONDKMJBG_03528	JDGDJJKN_03494	KLMHLHPE_02689	EGICBAEE_03653	LNEFCFII_03650	NILJAHBC_03348	KCIFOFJF_03584	CJCKLIFP_03207	IABBECJM_03250	LANDOHOG_03248	LOGCBOHO_02934	DKGFALGN_03433	PNFFMGCL_02763	BJCGHIIB_02567	NHHDDJBG_02377	LBLHELLM_02387	CGJPMKCI_02365	JOHJONHN_03180	CNEDDIJH_03045	JLJGJGIB_01724
lptD		LPS-assembly protein LptD	102	102	1	1	10986				2354	2360	2359	DGJMBLJC_04665	HFDHOMNF_02515	ALEPGING_01774	GEOGNNEI_03226	BINKDPLB_00502	IPPPMGOG_00102	NCHKEDON_01199	PLMPIJHD_03469	LIBHOFBA_03244	MFAGDJPO_02569	AICMNGMC_03490	JAGDPAPJ_03487	JICHJFDH_01504	AHEHGMLM_00156	PABJNMJP_04454	MAPHOHON_01712	ONDKMJBG_00375	JDGDJJKN_02352	KLMHLHPE_01656	EGICBAEE_01648	LNEFCFII_02251	NILJAHBC_01660	KCIFOFJF_01424	CJCKLIFP_01759	IABBECJM_02313	LANDOHOG_02312	LOGCBOHO_01890	DKGFALGN_01872	PNFFMGCL_02069	BJCGHIIB_01690	NHHDDJBG_01410	LBLHELLM_01376	CGJPMKCI_01680	JOHJONHN_01775	CNEDDIJH_01289	JLJGJGIB_01148
ung		Uracil-DNA glycosylase	102	102	1	1	10698				689	689	689	DGJMBLJC_01030	HFDHOMNF_02896	ALEPGING_03909	GEOGNNEI_02861	BINKDPLB_01989	IPPPMGOG_01470	NCHKEDON_01029	PLMPIJHD_02829	LIBHOFBA_02641	MFAGDJPO_01449	AICMNGMC_02949	JAGDPAPJ_02884	JICHJFDH_03469	AHEHGMLM_02077	PABJNMJP_04132	MAPHOHON_03801	ONDKMJBG_03264	JDGDJJKN_03159	KLMHLHPE_02353	EGICBAEE_01480	LNEFCFII_02083	NILJAHBC_02296	KCIFOFJF_03222	CJCKLIFP_01591	IABBECJM_01653	LANDOHOG_02057	LOGCBOHO_02058	DKGFALGN_02547	PNFFMGCL_01691	BJCGHIIB_02023	NHHDDJBG_01829	LBLHELLM_00902	CGJPMKCI_01848	JOHJONHN_02056	CNEDDIJH_01622	JLJGJGIB_01316
hfq		RNA-binding protein Hfq	102	102	1	1	16109				308	308	308	DGJMBLJC_00306	HFDHOMNF_02184	ALEPGING_01987	GEOGNNEI_03455	BINKDPLB_04362	IPPPMGOG_02908	NCHKEDON_04363	PLMPIJHD_03729	LIBHOFBA_03819	MFAGDJPO_03539	AICMNGMC_03729	JAGDPAPJ_03730	JICHJFDH_02723	AHEHGMLM_01786	PABJNMJP_00625	MAPHOHON_01352	ONDKMJBG_02153	JDGDJJKN_02683	KLMHLHPE_03608	EGICBAEE_02667	LNEFCFII_02558	NILJAHBC_01352	KCIFOFJF_02774	CJCKLIFP_02803	IABBECJM_02961	LANDOHOG_02959	LOGCBOHO_02531	DKGFALGN_03045	PNFFMGCL_03442	BJCGHIIB_04035	NHHDDJBG_03907	LBLHELLM_03617	CGJPMKCI_03856	JOHJONHN_04152	CNEDDIJH_03975	JLJGJGIB_03611
lpxA		Acyl-[acyl-carrier-protein]--UDP-N-acetylglucosamine O-acyltransferase	102	102	1	1	10744				788	788	788	DGJMBLJC_04819	HFDHOMNF_02674	ALEPGING_00261	GEOGNNEI_03365	BINKDPLB_00641	IPPPMGOG_00241	NCHKEDON_01060	PLMPIJHD_03608	LIBHOFBA_03383	MFAGDJPO_02244	AICMNGMC_03629	JAGDPAPJ_03626	JICHJFDH_01364	AHEHGMLM_00017	PABJNMJP_04593	MAPHOHON_01851	ONDKMJBG_00514	JDGDJJKN_04290	KLMHLHPE_01795	EGICBAEE_01509	LNEFCFII_02112	NILJAHBC_01799	KCIFOFJF_01563	CJCKLIFP_01620	IABBECJM_02452	LANDOHOG_02451	LOGCBOHO_02029	DKGFALGN_02011	PNFFMGCL_02208	BJCGHIIB_01829	NHHDDJBG_01271	LBLHELLM_01515	CGJPMKCI_01819	JOHJONHN_01636	CNEDDIJH_01428	JLJGJGIB_01287
lpxD		UDP-3-O-(3-hydroxymyristoyl)glucosamine N-acyltransferase	102	102	1	1	10746				1025	1025	1025	DGJMBLJC_04817	HFDHOMNF_02672	ALEPGING_00263	GEOGNNEI_03363	BINKDPLB_00639	IPPPMGOG_00239	NCHKEDON_01062	PLMPIJHD_03606	LIBHOFBA_03381	MFAGDJPO_02242	AICMNGMC_03627	JAGDPAPJ_03624	JICHJFDH_01366	AHEHGMLM_00019	PABJNMJP_04591	MAPHOHON_01849	ONDKMJBG_00512	JDGDJJKN_04292	KLMHLHPE_01793	EGICBAEE_01511	LNEFCFII_02114	NILJAHBC_01797	KCIFOFJF_01561	CJCKLIFP_01622	IABBECJM_02450	LANDOHOG_02449	LOGCBOHO_02027	DKGFALGN_02009	PNFFMGCL_02206	BJCGHIIB_01827	NHHDDJBG_01273	LBLHELLM_01513	CGJPMKCI_01817	JOHJONHN_01638	CNEDDIJH_01426	JLJGJGIB_01285
epd		D-erythrose-4-phosphate dehydrogenase	102	102	1	1	1706				1028	1046	1045	DGJMBLJC_03416	HFDHOMNF_03797	ALEPGING_01584	GEOGNNEI_01553	BINKDPLB_00314	IPPPMGOG_04022	NCHKEDON_01829	PLMPIJHD_01347	LIBHOFBA_01157	MFAGDJPO_03325	AICMNGMC_01348	JAGDPAPJ_01491	JICHJFDH_01855	AHEHGMLM_03877	PABJNMJP_00138	MAPHOHON_02009	ONDKMJBG_02710	JDGDJJKN_01341	KLMHLHPE_01053	EGICBAEE_00710	LNEFCFII_01532	NILJAHBC_02177	KCIFOFJF_01694	CJCKLIFP_02320	IABBECJM_01534	LANDOHOG_01287	LOGCBOHO_01287	DKGFALGN_01312	PNFFMGCL_01370	BJCGHIIB_00847	NHHDDJBG_00314	LBLHELLM_00315	CGJPMKCI_01009	JOHJONHN_00763	CNEDDIJH_00869	JLJGJGIB_00819
trmB		tRNA (guanine-N(7)-)-methyltransferase	102	102	1	1	1647				719	719	719	DGJMBLJC_03453	HFDHOMNF_03756	ALEPGING_01097	GEOGNNEI_01591	BINKDPLB_00352	IPPPMGOG_04060	NCHKEDON_01867	PLMPIJHD_01385	LIBHOFBA_01195	MFAGDJPO_03363	AICMNGMC_01386	JAGDPAPJ_01529	JICHJFDH_03074	AHEHGMLM_03839	PABJNMJP_00100	MAPHOHON_01971	ONDKMJBG_02747	JDGDJJKN_01302	KLMHLHPE_01015	EGICBAEE_00672	LNEFCFII_01570	NILJAHBC_02215	KCIFOFJF_01656	CJCKLIFP_02358	IABBECJM_01572	LANDOHOG_01249	LOGCBOHO_01249	DKGFALGN_01274	PNFFMGCL_01332	BJCGHIIB_00809	NHHDDJBG_00352	LBLHELLM_00353	CGJPMKCI_00971	JOHJONHN_00725	CNEDDIJH_00907	JLJGJGIB_00857
aroG		Phospho-2-dehydro-3-deoxyheptonate aldolase, Phe-sensitive	102	102	1	1	5107				1052	1052	1052	DGJMBLJC_03233	HFDHOMNF_02859	ALEPGING_04448	GEOGNNEI_04181	BINKDPLB_03936	IPPPMGOG_03226	NCHKEDON_04700	PLMPIJHD_04291	LIBHOFBA_04374	MFAGDJPO_04166	AICMNGMC_04094	JAGDPAPJ_04284	JICHJFDH_03440	AHEHGMLM_03638	PABJNMJP_02907	MAPHOHON_04500	ONDKMJBG_03631	JDGDJJKN_00707	KLMHLHPE_02733	EGICBAEE_03246	LNEFCFII_03105	NILJAHBC_03392	KCIFOFJF_03034	CJCKLIFP_03349	IABBECJM_03564	LANDOHOG_03562	LOGCBOHO_03076	DKGFALGN_02927	PNFFMGCL_04376	BJCGHIIB_02784	NHHDDJBG_04375	LBLHELLM_04282	CGJPMKCI_02576	JOHJONHN_04032	CNEDDIJH_03723	JLJGJGIB_04262
artP		Arginine transport ATP-binding protein ArtP	102	102	1	1	5351				728	728	728	DGJMBLJC_01206	HFDHOMNF_01350	ALEPGING_02732	GEOGNNEI_04426	BINKDPLB_01569	IPPPMGOG_03418	NCHKEDON_01576	PLMPIJHD_04537	LIBHOFBA_04620	MFAGDJPO_04556	AICMNGMC_04345	JAGDPAPJ_04530	JICHJFDH_00844	AHEHGMLM_02229	PABJNMJP_01812	MAPHOHON_03447	ONDKMJBG_04260	JDGDJJKN_00587	KLMHLHPE_03338	EGICBAEE_03491	LNEFCFII_03348	NILJAHBC_03640	KCIFOFJF_03425	CJCKLIFP_03749	IABBECJM_03792	LANDOHOG_03635	LOGCBOHO_03647	DKGFALGN_03331	PNFFMGCL_04137	BJCGHIIB_03696	NHHDDJBG_03415	LBLHELLM_04053	CGJPMKCI_03728	JOHJONHN_03629	CNEDDIJH_03151	JLJGJGIB_02619
flhD		Flagellar transcriptional regulator FlhD	102	102	1	1	8998				341	341	341	DGJMBLJC_03075	HFDHOMNF_00944	ALEPGING_02003	GEOGNNEI_00296	BINKDPLB_03266	IPPPMGOG_02467	NCHKEDON_04009	PLMPIJHD_00154	LIBHOFBA_03459	MFAGDJPO_00154	AICMNGMC_00154	JAGDPAPJ_00297	JICHJFDH_02296	AHEHGMLM_00834	PABJNMJP_00813	MAPHOHON_00297	ONDKMJBG_01669	JDGDJJKN_01867	KLMHLHPE_01846	EGICBAEE_02193	LNEFCFII_00878	NILJAHBC_00880	KCIFOFJF_00297	CJCKLIFP_00880	IABBECJM_00297	LANDOHOG_00296	LOGCBOHO_00296	DKGFALGN_00878	PNFFMGCL_00296	BJCGHIIB_01357	NHHDDJBG_03699	LBLHELLM_03877	CGJPMKCI_01347	JOHJONHN_00072	CNEDDIJH_01180	JLJGJGIB_00434
rplQ		50S ribosomal protein L17	102	102	1	1	14617				383	386	383	DGJMBLJC_02784	HFDHOMNF_02791	ALEPGING_01821	GEOGNNEI_02914	BINKDPLB_03121	IPPPMGOG_02093	NCHKEDON_01633	PLMPIJHD_03161	LIBHOFBA_02924	MFAGDJPO_02938	AICMNGMC_03142	JAGDPAPJ_03167	JICHJFDH_01130	AHEHGMLM_04319	PABJNMJP_01727	MAPHOHON_04629	ONDKMJBG_00032	JDGDJJKN_04501	KLMHLHPE_04479	EGICBAEE_04530	LNEFCFII_04568	NILJAHBC_04586	KCIFOFJF_04586	CJCKLIFP_04600	IABBECJM_04583	LANDOHOG_04598	LOGCBOHO_04601	DKGFALGN_04520	PNFFMGCL_04287	BJCGHIIB_04295	NHHDDJBG_04301	LBLHELLM_04200	CGJPMKCI_04249	JOHJONHN_04519	CNEDDIJH_04531	JLJGJGIB_04283
deoD		Purine nucleoside phosphorylase DeoD-type	102	102	1	1	11243				719	719	719	DGJMBLJC_00090	HFDHOMNF_02386	ALEPGING_00885	GEOGNNEI_03108	BINKDPLB_01231	IPPPMGOG_04353	NCHKEDON_03546	PLMPIJHD_03351	LIBHOFBA_03126	MFAGDJPO_02451	AICMNGMC_03372	JAGDPAPJ_03369	JICHJFDH_02213	AHEHGMLM_03336	PABJNMJP_04336	MAPHOHON_01594	ONDKMJBG_00257	JDGDJJKN_02473	KLMHLHPE_01538	EGICBAEE_01766	LNEFCFII_02369	NILJAHBC_01542	KCIFOFJF_01306	CJCKLIFP_01877	IABBECJM_02195	LANDOHOG_02194	LOGCBOHO_01772	DKGFALGN_01754	PNFFMGCL_02357	BJCGHIIB_02112	NHHDDJBG_01170	LBLHELLM_01197	CGJPMKCI_02102	JOHJONHN_02299	CNEDDIJH_01711	JLJGJGIB_01559
dcuA_1		Anaerobic C4-dicarboxylate transporter DcuA	102	102	1	1	16064				1301	1301	1301	DGJMBLJC_00341	HFDHOMNF_04312	ALEPGING_01954	GEOGNNEI_03489	BINKDPLB_04396	IPPPMGOG_02942	NCHKEDON_04329	PLMPIJHD_03763	LIBHOFBA_03853	MFAGDJPO_03573	AICMNGMC_03763	JAGDPAPJ_03764	JICHJFDH_02688	AHEHGMLM_01820	PABJNMJP_00591	MAPHOHON_01318	ONDKMJBG_02187	JDGDJJKN_02717	KLMHLHPE_03642	EGICBAEE_02701	LNEFCFII_02592	NILJAHBC_01318	KCIFOFJF_02740	CJCKLIFP_02837	IABBECJM_02927	LANDOHOG_02925	LOGCBOHO_02565	DKGFALGN_03011	PNFFMGCL_03477	BJCGHIIB_03812	NHHDDJBG_02439	LBLHELLM_02546	CGJPMKCI_02427	JOHJONHN_04190	CNEDDIJH_01864	JLJGJGIB_01882
group_18794		hypothetical protein	102	102	1	1	9105				794	794	794	DGJMBLJC_03017	HFDHOMNF_01000	ALEPGING_04026	GEOGNNEI_00244	BINKDPLB_03318	IPPPMGOG_02519	NCHKEDON_04061	PLMPIJHD_00102	LIBHOFBA_03511	MFAGDJPO_00102	AICMNGMC_00102	JAGDPAPJ_00245	JICHJFDH_02244	AHEHGMLM_00886	PABJNMJP_03234	MAPHOHON_00245	ONDKMJBG_01721	JDGDJJKN_01815	KLMHLHPE_01898	EGICBAEE_02141	LNEFCFII_00930	NILJAHBC_00932	KCIFOFJF_00245	CJCKLIFP_00932	IABBECJM_00245	LANDOHOG_00244	LOGCBOHO_00244	DKGFALGN_00930	PNFFMGCL_00244	BJCGHIIB_01409	NHHDDJBG_01007	LBLHELLM_03339	CGJPMKCI_01399	JOHJONHN_00020	CNEDDIJH_01232	JLJGJGIB_00486
group_18795		hypothetical protein	102	102	1	1	2208				158	158	158	DGJMBLJC_01472	HFDHOMNF_03394	ALEPGING_03517	GEOGNNEI_01264	BINKDPLB_00025	IPPPMGOG_01131	NCHKEDON_02723	PLMPIJHD_01058	LIBHOFBA_00868	MFAGDJPO_03036	AICMNGMC_01059	JAGDPAPJ_01202	JICHJFDH_00070	AHEHGMLM_02697	PABJNMJP_00426	MAPHOHON_02295	ONDKMJBG_00559	JDGDJJKN_01624	KLMHLHPE_01340	EGICBAEE_00998	LNEFCFII_01244	NILJAHBC_01889	KCIFOFJF_01984	CJCKLIFP_02030	IABBECJM_01247	LANDOHOG_01574	LOGCBOHO_01574	DKGFALGN_01601	PNFFMGCL_01658	BJCGHIIB_01136	NHHDDJBG_00025	LBLHELLM_00026	CGJPMKCI_01296	JOHJONHN_01052	CNEDDIJH_00580	JLJGJGIB_00530
pssA		CDP-diacylglycerol--serine O-phosphatidyltransferase	102	102	1	1	10705				1355	1355	1355	DGJMBLJC_01035	HFDHOMNF_02891	ALEPGING_03904	GEOGNNEI_02866	BINKDPLB_01994	IPPPMGOG_01475	NCHKEDON_01034	PLMPIJHD_02834	LIBHOFBA_02646	MFAGDJPO_01454	AICMNGMC_02954	JAGDPAPJ_02889	JICHJFDH_03464	AHEHGMLM_02072	PABJNMJP_04137	MAPHOHON_03796	ONDKMJBG_03269	JDGDJJKN_03164	KLMHLHPE_02358	EGICBAEE_01485	LNEFCFII_02088	NILJAHBC_02291	KCIFOFJF_03217	CJCKLIFP_01596	IABBECJM_01648	LANDOHOG_02062	LOGCBOHO_02053	DKGFALGN_02552	PNFFMGCL_01686	BJCGHIIB_02028	NHHDDJBG_01834	LBLHELLM_00897	CGJPMKCI_01843	JOHJONHN_02051	CNEDDIJH_01627	JLJGJGIB_01311
xerC		Tyrosine recombinase XerC	102	102	1	1	15283				902	902	902	DGJMBLJC_01672	HFDHOMNF_01995	ALEPGING_00097	GEOGNNEI_02083	BINKDPLB_02525	IPPPMGOG_01286	NCHKEDON_04464	PLMPIJHD_02125	LIBHOFBA_01933	MFAGDJPO_01992	AICMNGMC_01966	JAGDPAPJ_02125	JICHJFDH_03826	AHEHGMLM_02343	PABJNMJP_00729	MAPHOHON_04024	ONDKMJBG_02014	JDGDJJKN_04181	KLMHLHPE_04169	EGICBAEE_04064	LNEFCFII_04165	NILJAHBC_04182	KCIFOFJF_04096	CJCKLIFP_04188	IABBECJM_04242	LANDOHOG_04189	LOGCBOHO_04240	DKGFALGN_03780	PNFFMGCL_03767	BJCGHIIB_03645	NHHDDJBG_03631	LBLHELLM_03509	CGJPMKCI_03615	JOHJONHN_03913	CNEDDIJH_03539	JLJGJGIB_03501
hycG		Formate hydrogenlyase subunit 7	102	102	1	1	2144				767	767	767	DGJMBLJC_01306	HFDHOMNF_03450	ALEPGING_02326	GEOGNNEI_01318	BINKDPLB_00079	IPPPMGOG_01078	NCHKEDON_01378	PLMPIJHD_01112	LIBHOFBA_00922	MFAGDJPO_03090	AICMNGMC_01113	JAGDPAPJ_01256	JICHJFDH_00122	AHEHGMLM_02645	PABJNMJP_00372	MAPHOHON_02243	ONDKMJBG_00613	JDGDJJKN_01572	KLMHLHPE_01288	EGICBAEE_00944	LNEFCFII_01296	NILJAHBC_01941	KCIFOFJF_01930	CJCKLIFP_02084	IABBECJM_01299	LANDOHOG_01522	LOGCBOHO_01522	DKGFALGN_01547	PNFFMGCL_01604	BJCGHIIB_01082	NHHDDJBG_00079	LBLHELLM_00080	CGJPMKCI_01244	JOHJONHN_00998	CNEDDIJH_00634	JLJGJGIB_00584
tatC		Sec-independent protein translocase protein TatC	102	102	1	1	15322				779	779	779	DGJMBLJC_01701	HFDHOMNF_01966	ALEPGING_01940	GEOGNNEI_02109	BINKDPLB_02962	IPPPMGOG_01260	NCHKEDON_04438	PLMPIJHD_02151	LIBHOFBA_01959	MFAGDJPO_02018	AICMNGMC_01992	JAGDPAPJ_02151	JICHJFDH_03800	AHEHGMLM_02369	PABJNMJP_00703	MAPHOHON_03998	ONDKMJBG_02040	JDGDJJKN_04207	KLMHLHPE_04195	EGICBAEE_04090	LNEFCFII_04139	NILJAHBC_04156	KCIFOFJF_04070	CJCKLIFP_04162	IABBECJM_04268	LANDOHOG_04215	LOGCBOHO_04266	DKGFALGN_03806	PNFFMGCL_03793	BJCGHIIB_03619	NHHDDJBG_03657	LBLHELLM_03535	CGJPMKCI_03589	JOHJONHN_03887	CNEDDIJH_03513	JLJGJGIB_03527
serS		Serine--tRNA ligase	102	102	1	1	5418				1292	1292	1292	DGJMBLJC_01167	HFDHOMNF_01311	ALEPGING_03300	GEOGNNEI_04458	BINKDPLB_03095	IPPPMGOG_03037	NCHKEDON_03255	PLMPIJHD_04569	LIBHOFBA_04652	MFAGDJPO_04588	AICMNGMC_04377	JAGDPAPJ_04562	JICHJFDH_00877	AHEHGMLM_02262	PABJNMJP_01845	MAPHOHON_03414	ONDKMJBG_04227	JDGDJJKN_00555	KLMHLHPE_03306	EGICBAEE_03459	LNEFCFII_03316	NILJAHBC_03672	KCIFOFJF_03457	CJCKLIFP_03781	IABBECJM_03824	LANDOHOG_03603	LOGCBOHO_03679	DKGFALGN_03363	PNFFMGCL_04169	BJCGHIIB_03728	NHHDDJBG_03383	LBLHELLM_04085	CGJPMKCI_03696	JOHJONHN_03661	CNEDDIJH_03183	JLJGJGIB_02651
tktA		Transketolase 1	102	102	1	1	1700				1991	1991	1991	DGJMBLJC_03422	HFDHOMNF_03790	ALEPGING_01578	GEOGNNEI_01559	BINKDPLB_00320	IPPPMGOG_04028	NCHKEDON_01835	PLMPIJHD_01353	LIBHOFBA_01163	MFAGDJPO_03331	AICMNGMC_01354	JAGDPAPJ_01497	JICHJFDH_01849	AHEHGMLM_03871	PABJNMJP_00132	MAPHOHON_02003	ONDKMJBG_02716	JDGDJJKN_01335	KLMHLHPE_01047	EGICBAEE_00704	LNEFCFII_01538	NILJAHBC_02183	KCIFOFJF_01688	CJCKLIFP_02326	IABBECJM_01540	LANDOHOG_01281	LOGCBOHO_01281	DKGFALGN_01306	PNFFMGCL_01364	BJCGHIIB_00841	NHHDDJBG_00320	LBLHELLM_00321	CGJPMKCI_01003	JOHJONHN_00757	CNEDDIJH_00875	JLJGJGIB_00825
yhaJ_2		HTH-type transcriptional regulator YhaJ	102	102	1	1	13222				896	896	896	DGJMBLJC_03649	HFDHOMNF_01154	ALEPGING_02776	GEOGNNEI_01892	BINKDPLB_01287	IPPPMGOG_03529	NCHKEDON_01464	PLMPIJHD_01818	LIBHOFBA_01627	MFAGDJPO_01799	AICMNGMC_01677	JAGDPAPJ_01820	JICHJFDH_01172	AHEHGMLM_03767	PABJNMJP_02412	MAPHOHON_03340	ONDKMJBG_03432	JDGDJJKN_01139	KLMHLHPE_04061	EGICBAEE_03871	LNEFCFII_03848	NILJAHBC_03867	KCIFOFJF_03782	CJCKLIFP_03569	IABBECJM_03612	LANDOHOG_03866	LOGCBOHO_03467	DKGFALGN_03587	PNFFMGCL_03303	BJCGHIIB_03457	NHHDDJBG_03543	LBLHELLM_03401	CGJPMKCI_03537	JOHJONHN_03703	CNEDDIJH_03225	JLJGJGIB_03394
era		GTPase Era	102	102	1	1	10672				905	905	905	DGJMBLJC_01015	HFDHOMNF_02913	ALEPGING_02557	GEOGNNEI_02847	BINKDPLB_01975	IPPPMGOG_01456	NCHKEDON_01015	PLMPIJHD_02815	LIBHOFBA_02627	MFAGDJPO_01435	AICMNGMC_02935	JAGDPAPJ_02870	JICHJFDH_03483	AHEHGMLM_02091	PABJNMJP_04118	MAPHOHON_03815	ONDKMJBG_03250	JDGDJJKN_03145	KLMHLHPE_02339	EGICBAEE_01466	LNEFCFII_02069	NILJAHBC_02310	KCIFOFJF_03236	CJCKLIFP_01577	IABBECJM_01667	LANDOHOG_02043	LOGCBOHO_02072	DKGFALGN_02533	PNFFMGCL_01705	BJCGHIIB_02009	NHHDDJBG_01815	LBLHELLM_00916	CGJPMKCI_01862	JOHJONHN_02070	CNEDDIJH_01608	JLJGJGIB_01330
sapB		Peptide transport system permease protein SapB	102	102	1	1	7332				965	965	965	DGJMBLJC_04081	HFDHOMNF_00700	ALEPGING_03231	GEOGNNEI_00529	BINKDPLB_00984	IPPPMGOG_01540	NCHKEDON_00610	PLMPIJHD_00388	LIBHOFBA_00197	MFAGDJPO_00388	AICMNGMC_00388	JAGDPAPJ_00531	JICHJFDH_00520	AHEHGMLM_00600	PABJNMJP_01047	MAPHOHON_00531	ONDKMJBG_01436	JDGDJJKN_02098	KLMHLHPE_00271	EGICBAEE_00133	LNEFCFII_00645	NILJAHBC_00646	KCIFOFJF_00532	CJCKLIFP_00646	IABBECJM_00532	LANDOHOG_00531	LOGCBOHO_00531	DKGFALGN_00645	PNFFMGCL_00529	BJCGHIIB_00007	NHHDDJBG_01648	LBLHELLM_01749	CGJPMKCI_00657	JOHJONHN_00306	CNEDDIJH_00497	JLJGJGIB_00202
yqjD		putative protein YqjD	102	102	1	1	13213				305	305	305	DGJMBLJC_03643	HFDHOMNF_01148	ALEPGING_02782	GEOGNNEI_01898	BINKDPLB_01293	IPPPMGOG_03523	NCHKEDON_01470	PLMPIJHD_01824	LIBHOFBA_01633	MFAGDJPO_01805	AICMNGMC_01683	JAGDPAPJ_01826	JICHJFDH_01178	AHEHGMLM_03761	PABJNMJP_02418	MAPHOHON_03346	ONDKMJBG_03426	JDGDJJKN_01145	KLMHLHPE_04055	EGICBAEE_03877	LNEFCFII_03842	NILJAHBC_03861	KCIFOFJF_03776	CJCKLIFP_03563	IABBECJM_03606	LANDOHOG_03860	LOGCBOHO_03461	DKGFALGN_03593	PNFFMGCL_03309	BJCGHIIB_03451	NHHDDJBG_03549	LBLHELLM_03395	CGJPMKCI_03543	JOHJONHN_03697	CNEDDIJH_03219	JLJGJGIB_03388
ydgH		Protein YdgH	102	102	1	1	6851				944	944	944	DGJMBLJC_02637	HFDHOMNF_00467	ALEPGING_02108	GEOGNNEI_00750	BINKDPLB_02640	IPPPMGOG_01761	NCHKEDON_00389	PLMPIJHD_00607	LIBHOFBA_00419	MFAGDJPO_00609	AICMNGMC_00609	JAGDPAPJ_00753	JICHJFDH_04403	AHEHGMLM_00378	PABJNMJP_01268	MAPHOHON_00752	ONDKMJBG_01215	JDGDJJKN_00099	KLMHLHPE_00492	EGICBAEE_00354	LNEFCFII_00424	NILJAHBC_00425	KCIFOFJF_00753	CJCKLIFP_00425	IABBECJM_00753	LANDOHOG_00752	LOGCBOHO_00752	DKGFALGN_00424	PNFFMGCL_00750	BJCGHIIB_00227	NHHDDJBG_00470	LBLHELLM_00875	CGJPMKCI_00423	JOHJONHN_00528	CNEDDIJH_00276	JLJGJGIB_02042
group_18807		hypothetical protein	102	102	1	1	636				1244	1244	1244	DGJMBLJC_05025	HFDHOMNF_04442	ALEPGING_02341	GEOGNNEI_04264	BINKDPLB_01405	IPPPMGOG_00340	NCHKEDON_03754	PLMPIJHD_04375	LIBHOFBA_04458	MFAGDJPO_04250	AICMNGMC_04183	JAGDPAPJ_04368	JICHJFDH_02538	AHEHGMLM_03232	PABJNMJP_02112	MAPHOHON_03152	ONDKMJBG_02576	JDGDJJKN_03582	KLMHLHPE_03179	EGICBAEE_02530	LNEFCFII_03189	NILJAHBC_02945	KCIFOFJF_02243	CJCKLIFP_02507	IABBECJM_02549	LANDOHOG_02707	LOGCBOHO_03350	DKGFALGN_02108	PNFFMGCL_02893	BJCGHIIB_02884	NHHDDJBG_02674	LBLHELLM_02737	CGJPMKCI_02979	JOHJONHN_02713	CNEDDIJH_02081	JLJGJGIB_02309
glmM		Phosphoglucosamine mutase	102	102	1	1	13430				1337	1337	1337	DGJMBLJC_01563	HFDHOMNF_01212	ALEPGING_01352	GEOGNNEI_01841	BINKDPLB_03544	IPPPMGOG_03580	NCHKEDON_01412	PLMPIJHD_01766	LIBHOFBA_01575	MFAGDJPO_01747	AICMNGMC_01625	JAGDPAPJ_01768	JICHJFDH_03902	AHEHGMLM_04220	PABJNMJP_02361	MAPHOHON_03289	ONDKMJBG_03483	JDGDJJKN_01087	KLMHLHPE_04112	EGICBAEE_03819	LNEFCFII_03900	NILJAHBC_03918	KCIFOFJF_03833	CJCKLIFP_03620	IABBECJM_03663	LANDOHOG_03917	LOGCBOHO_03518	DKGFALGN_03536	PNFFMGCL_03251	BJCGHIIB_03508	NHHDDJBG_03492	LBLHELLM_03452	CGJPMKCI_03486	JOHJONHN_03754	CNEDDIJH_03276	JLJGJGIB_03445
yifK		putative transport protein YifK	102	102	1	1	15258				1382	1385	1384	DGJMBLJC_01650	HFDHOMNF_02014	ALEPGING_04233	GEOGNNEI_02066	BINKDPLB_02508	IPPPMGOG_01303	NCHKEDON_04481	PLMPIJHD_02108	LIBHOFBA_01916	MFAGDJPO_01975	AICMNGMC_01949	JAGDPAPJ_02108	JICHJFDH_03842	AHEHGMLM_04426	PABJNMJP_00746	MAPHOHON_04041	ONDKMJBG_01997	JDGDJJKN_04161	KLMHLHPE_04152	EGICBAEE_04047	LNEFCFII_04182	NILJAHBC_04199	KCIFOFJF_04113	CJCKLIFP_04205	IABBECJM_04225	LANDOHOG_04172	LOGCBOHO_04223	DKGFALGN_03763	PNFFMGCL_03750	BJCGHIIB_03662	NHHDDJBG_03614	LBLHELLM_03492	CGJPMKCI_03632	JOHJONHN_03930	CNEDDIJH_03556	JLJGJGIB_03484
hdeB		Acid stress chaperone HdeB	102	102	1	1	7078				329	329	329	DGJMBLJC_04239	HFDHOMNF_00562	ALEPGING_02714	GEOGNNEI_00661	BINKDPLB_02729	IPPPMGOG_01672	NCHKEDON_00478	PLMPIJHD_00520	LIBHOFBA_00329	MFAGDJPO_00520	AICMNGMC_00520	JAGDPAPJ_00664	JICHJFDH_00653	AHEHGMLM_00467	PABJNMJP_01179	MAPHOHON_00663	ONDKMJBG_01304	JDGDJJKN_00011	KLMHLHPE_00403	EGICBAEE_00265	LNEFCFII_00513	NILJAHBC_00514	KCIFOFJF_00664	CJCKLIFP_00514	IABBECJM_00664	LANDOHOG_00663	LOGCBOHO_00663	DKGFALGN_00513	PNFFMGCL_00661	BJCGHIIB_00139	NHHDDJBG_01516	LBLHELLM_01881	CGJPMKCI_00525	JOHJONHN_00438	CNEDDIJH_00365	JLJGJGIB_00070
coaA		Pantothenate kinase	102	102	1	1	15650				926	926	926	DGJMBLJC_03267	HFDHOMNF_02882	ALEPGING_03736	GEOGNNEI_02962	BINKDPLB_03557	IPPPMGOG_01378	NCHKEDON_03262	PLMPIJHD_03659	LIBHOFBA_03408	MFAGDJPO_03467	AICMNGMC_03124	JAGDPAPJ_03651	JICHJFDH_02970	AHEHGMLM_02000	PABJNMJP_03710	MAPHOHON_04712	ONDKMJBG_04609	JDGDJJKN_04555	KLMHLHPE_04519	EGICBAEE_04607	LNEFCFII_04643	NILJAHBC_04664	KCIFOFJF_04662	CJCKLIFP_04660	IABBECJM_04659	LANDOHOG_04663	LOGCBOHO_04657	DKGFALGN_04718	PNFFMGCL_04390	BJCGHIIB_04392	NHHDDJBG_04396	LBLHELLM_04318	CGJPMKCI_04386	JOHJONHN_04640	CNEDDIJH_04631	JLJGJGIB_04412
elaB		Protein ElaB	102	102	1	1	9994				305	305	305	DGJMBLJC_02334	HFDHOMNF_04645	ALEPGING_00664	GEOGNNEI_02497	BINKDPLB_00864	IPPPMGOG_00746	NCHKEDON_00673	PLMPIJHD_02473	LIBHOFBA_02284	MFAGDJPO_01093	AICMNGMC_02593	JAGDPAPJ_02528	JICHJFDH_03138	AHEHGMLM_01188	PABJNMJP_03775	MAPHOHON_02639	ONDKMJBG_02905	JDGDJJKN_02796	KLMHLHPE_03038	EGICBAEE_01125	LNEFCFII_01728	NILJAHBC_02651	KCIFOFJF_02541	CJCKLIFP_01236	IABBECJM_02008	LANDOHOG_01702	LOGCBOHO_02413	DKGFALGN_03148	PNFFMGCL_01975	BJCGHIIB_03182	NHHDDJBG_02779	LBLHELLM_02888	CGJPMKCI_03157	JOHJONHN_01990	CNEDDIJH_02518	JLJGJGIB_03218
mutM		Formamidopyrimidine-DNA glycosylase	102	102	1	1	14090				809	809	809	DGJMBLJC_02094	HFDHOMNF_04062	ALEPGING_03614	GEOGNNEI_03740	BINKDPLB_04039	IPPPMGOG_02737	NCHKEDON_02491	PLMPIJHD_04020	LIBHOFBA_04105	MFAGDJPO_03830	AICMNGMC_02446	JAGDPAPJ_04020	JICHJFDH_01016	AHEHGMLM_01438	PABJNMJP_03588	MAPHOHON_02778	ONDKMJBG_04111	JDGDJJKN_03252	KLMHLHPE_02444	EGICBAEE_03156	LNEFCFII_02815	NILJAHBC_03104	KCIFOFJF_02944	CJCKLIFP_03061	IABBECJM_03104	LANDOHOG_03102	LOGCBOHO_02788	DKGFALGN_02665	PNFFMGCL_02520	BJCGHIIB_02324	NHHDDJBG_02134	LBLHELLM_02268	CGJPMKCI_02839	JOHJONHN_02510	CNEDDIJH_02231	JLJGJGIB_02441
purC		Phosphoribosylaminoimidazole-succinocarboxamide synthase	102	102	1	1	10471				713	713	713	DGJMBLJC_02724	HFDHOMNF_03017	ALEPGING_01055	GEOGNNEI_02754	BINKDPLB_01882	IPPPMGOG_00860	NCHKEDON_00922	PLMPIJHD_02722	LIBHOFBA_02534	MFAGDJPO_01342	AICMNGMC_02842	JAGDPAPJ_02777	JICHJFDH_03577	AHEHGMLM_02788	PABJNMJP_04025	MAPHOHON_02390	ONDKMJBG_03155	JDGDJJKN_03045	KLMHLHPE_02246	EGICBAEE_01373	LNEFCFII_01976	NILJAHBC_02404	KCIFOFJF_03330	CJCKLIFP_01483	IABBECJM_01761	LANDOHOG_01949	LOGCBOHO_02166	DKGFALGN_02440	PNFFMGCL_01798	BJCGHIIB_01916	NHHDDJBG_01722	LBLHELLM_01009	CGJPMKCI_01955	JOHJONHN_02163	CNEDDIJH_01515	JLJGJGIB_01423
yghA		putative oxidoreductase YghA	102	102	1	1	13071				884	884	884	DGJMBLJC_03520	HFDHOMNF_03689	ALEPGING_00718	GEOGNNEI_01652	BINKDPLB_02325	IPPPMGOG_04121	NCHKEDON_01928	PLMPIJHD_01446	LIBHOFBA_01256	MFAGDJPO_03424	AICMNGMC_01447	JAGDPAPJ_01590	JICHJFDH_03013	AHEHGMLM_04300	PABJNMJP_00039	MAPHOHON_01910	ONDKMJBG_02808	JDGDJJKN_01257	KLMHLHPE_00954	EGICBAEE_00611	LNEFCFII_01631	NILJAHBC_02276	KCIFOFJF_01595	CJCKLIFP_02419	IABBECJM_01633	LANDOHOG_01188	LOGCBOHO_01188	DKGFALGN_01213	PNFFMGCL_01271	BJCGHIIB_00748	NHHDDJBG_00413	LBLHELLM_00414	CGJPMKCI_00910	JOHJONHN_00664	CNEDDIJH_00968	JLJGJGIB_04065
apaG		Protein ApaG	102	102	1	1	10990				377	377	377	DGJMBLJC_04661	HFDHOMNF_02511	ALEPGING_01770	GEOGNNEI_03222	BINKDPLB_00498	IPPPMGOG_00098	NCHKEDON_01203	PLMPIJHD_03465	LIBHOFBA_03240	MFAGDJPO_02565	AICMNGMC_03486	JAGDPAPJ_03483	JICHJFDH_01508	AHEHGMLM_00160	PABJNMJP_04450	MAPHOHON_01708	ONDKMJBG_00371	JDGDJJKN_02356	KLMHLHPE_01652	EGICBAEE_01652	LNEFCFII_02255	NILJAHBC_01656	KCIFOFJF_01420	CJCKLIFP_01763	IABBECJM_02309	LANDOHOG_02308	LOGCBOHO_01886	DKGFALGN_01868	PNFFMGCL_02065	BJCGHIIB_01686	NHHDDJBG_01414	LBLHELLM_01372	CGJPMKCI_01676	JOHJONHN_01779	CNEDDIJH_01285	JLJGJGIB_01144
thrS		Threonine--tRNA ligase	102	102	1	1	6184				1928	1928	1928	DGJMBLJC_03787	HFDHOMNF_00308	ALEPGING_01235	GEOGNNEI_00895	BINKDPLB_02232	IPPPMGOG_01906	NCHKEDON_00244	PLMPIJHD_00752	LIBHOFBA_00564	MFAGDJPO_00754	AICMNGMC_00755	JAGDPAPJ_00898	JICHJFDH_04258	AHEHGMLM_02943	PABJNMJP_01413	MAPHOHON_00897	ONDKMJBG_01070	JDGDJJKN_00243	KLMHLHPE_00637	EGICBAEE_00499	LNEFCFII_00279	NILJAHBC_00280	KCIFOFJF_00898	CJCKLIFP_00280	IABBECJM_00898	LANDOHOG_00897	LOGCBOHO_00897	DKGFALGN_00279	PNFFMGCL_00895	BJCGHIIB_00372	NHHDDJBG_00615	LBLHELLM_00730	CGJPMKCI_00278	JOHJONHN_01355	CNEDDIJH_00131	JLJGJGIB_02187
group_18818		hypothetical protein	102	102	1	1	7413				173	173	173	DGJMBLJC_04031	HFDHOMNF_00751	ALEPGING_03715	GEOGNNEI_00483	BINKDPLB_01030	IPPPMGOG_02281	NCHKEDON_03823	PLMPIJHD_00341	LIBHOFBA_00150	MFAGDJPO_00341	AICMNGMC_00341	JAGDPAPJ_00484	JICHJFDH_00474	AHEHGMLM_00647	PABJNMJP_01000	MAPHOHON_00484	ONDKMJBG_01483	JDGDJJKN_02051	KLMHLHPE_00225	EGICBAEE_00086	LNEFCFII_00692	NILJAHBC_00693	KCIFOFJF_00485	CJCKLIFP_00693	IABBECJM_00485	LANDOHOG_00484	LOGCBOHO_00484	DKGFALGN_00692	PNFFMGCL_00483	BJCGHIIB_03871	NHHDDJBG_01877	LBLHELLM_02119	CGJPMKCI_00703	JOHJONHN_00259	CNEDDIJH_00544	JLJGJGIB_00248
speD		S-adenosylmethionine decarboxylase proenzyme	102	102	1	1	10859				794	794	794	DGJMBLJC_04746	HFDHOMNF_02602	ALEPGING_01907	GEOGNNEI_03301	BINKDPLB_00577	IPPPMGOG_00177	NCHKEDON_01124	PLMPIJHD_03544	LIBHOFBA_03319	MFAGDJPO_02644	AICMNGMC_03565	JAGDPAPJ_03562	JICHJFDH_01428	AHEHGMLM_00081	PABJNMJP_04529	MAPHOHON_01787	ONDKMJBG_00450	JDGDJJKN_02272	KLMHLHPE_01731	EGICBAEE_01573	LNEFCFII_02176	NILJAHBC_01735	KCIFOFJF_01499	CJCKLIFP_01684	IABBECJM_02388	LANDOHOG_02387	LOGCBOHO_01965	DKGFALGN_01947	PNFFMGCL_02144	BJCGHIIB_01765	NHHDDJBG_01335	LBLHELLM_01451	CGJPMKCI_01755	JOHJONHN_01700	CNEDDIJH_01364	JLJGJGIB_01223
pyrB		Aspartate carbamoyltransferase catalytic subunit	102	102	1	1	16260				935	935	935	DGJMBLJC_00199	HFDHOMNF_02289	ALEPGING_00332	GEOGNNEI_03017	BINKDPLB_01140	IPPPMGOG_04444	NCHKEDON_03455	PLMPIJHD_03260	LIBHOFBA_03035	MFAGDJPO_02360	AICMNGMC_03281	JAGDPAPJ_03278	JICHJFDH_02424	AHEHGMLM_02031	PABJNMJP_04193	MAPHOHON_01451	ONDKMJBG_00114	JDGDJJKN_02586	KLMHLHPE_01447	EGICBAEE_01857	LNEFCFII_02460	NILJAHBC_01451	KCIFOFJF_01215	CJCKLIFP_01968	IABBECJM_02104	LANDOHOG_02103	LOGCBOHO_01681	DKGFALGN_01663	PNFFMGCL_02266	BJCGHIIB_02204	NHHDDJBG_01066	LBLHELLM_01301	CGJPMKCI_02193	JOHJONHN_02390	CNEDDIJH_01802	JLJGJGIB_01650
dinG_1		putative ATP-dependent helicase DinG	102	102	1	1	7564				1910	1910	1910	DGJMBLJC_03188	HFDHOMNF_00838	ALEPGING_00203	GEOGNNEI_00400	BINKDPLB_03163	IPPPMGOG_02364	NCHKEDON_03906	PLMPIJHD_00258	LIBHOFBA_00067	MFAGDJPO_00258	AICMNGMC_00258	JAGDPAPJ_00401	JICHJFDH_00392	AHEHGMLM_00730	PABJNMJP_00917	MAPHOHON_00401	ONDKMJBG_01566	JDGDJJKN_01969	KLMHLHPE_00142	EGICBAEE_00003	LNEFCFII_00775	NILJAHBC_00777	KCIFOFJF_00401	CJCKLIFP_00777	IABBECJM_00401	LANDOHOG_00400	LOGCBOHO_00400	DKGFALGN_00775	PNFFMGCL_00400	BJCGHIIB_01254	NHHDDJBG_01960	LBLHELLM_02036	CGJPMKCI_00786	JOHJONHN_00176	CNEDDIJH_01078	JLJGJGIB_00331
mlaA		putative phospholipid-binding lipoprotein MlaA	102	102	1	1	10132				755	755	755	DGJMBLJC_02242	HFDHOMNF_04559	ALEPGING_03779	GEOGNNEI_02578	BINKDPLB_00945	IPPPMGOG_00665	NCHKEDON_00755	PLMPIJHD_02555	LIBHOFBA_02366	MFAGDJPO_01175	AICMNGMC_02675	JAGDPAPJ_02610	JICHJFDH_03219	AHEHGMLM_01270	PABJNMJP_03857	MAPHOHON_02557	ONDKMJBG_02987	JDGDJJKN_02875	KLMHLHPE_02957	EGICBAEE_01207	LNEFCFII_01810	NILJAHBC_02570	KCIFOFJF_02460	CJCKLIFP_01317	IABBECJM_01927	LANDOHOG_01783	LOGCBOHO_02332	DKGFALGN_03229	PNFFMGCL_01894	BJCGHIIB_03101	NHHDDJBG_02860	LBLHELLM_02969	CGJPMKCI_03076	JOHJONHN_01909	CNEDDIJH_02437	JLJGJGIB_03137
fabB		3-oxoacyl-[acyl-carrier-protein] synthase 1	102	102	1	1	10111				1214	1220	1214	DGJMBLJC_02257	HFDHOMNF_04575	ALEPGING_02277	GEOGNNEI_02564	BINKDPLB_00931	IPPPMGOG_00679	NCHKEDON_00740	PLMPIJHD_02540	LIBHOFBA_02351	MFAGDJPO_01160	AICMNGMC_02660	JAGDPAPJ_02595	JICHJFDH_03205	AHEHGMLM_01256	PABJNMJP_03843	MAPHOHON_02571	ONDKMJBG_02973	JDGDJJKN_02861	KLMHLHPE_02971	EGICBAEE_01192	LNEFCFII_01795	NILJAHBC_02584	KCIFOFJF_02474	CJCKLIFP_01303	IABBECJM_01941	LANDOHOG_01769	LOGCBOHO_02346	DKGFALGN_03215	PNFFMGCL_01908	BJCGHIIB_03115	NHHDDJBG_02846	LBLHELLM_02955	CGJPMKCI_03090	JOHJONHN_01923	CNEDDIJH_02451	JLJGJGIB_03151
hflK		Modulator of FtsH protease HflK	102	102	1	1	16111				1259	1259	1259	DGJMBLJC_00304	HFDHOMNF_02182	ALEPGING_01989	GEOGNNEI_03453	BINKDPLB_04360	IPPPMGOG_02906	NCHKEDON_04365	PLMPIJHD_03727	LIBHOFBA_03817	MFAGDJPO_03537	AICMNGMC_03727	JAGDPAPJ_03728	JICHJFDH_02725	AHEHGMLM_01784	PABJNMJP_00627	MAPHOHON_01354	ONDKMJBG_02151	JDGDJJKN_02681	KLMHLHPE_03606	EGICBAEE_02665	LNEFCFII_02556	NILJAHBC_01354	KCIFOFJF_02776	CJCKLIFP_02801	IABBECJM_02963	LANDOHOG_02961	LOGCBOHO_02529	DKGFALGN_03047	PNFFMGCL_03440	BJCGHIIB_04033	NHHDDJBG_03905	LBLHELLM_03619	CGJPMKCI_03854	JOHJONHN_04150	CNEDDIJH_03973	JLJGJGIB_03613
group_18825		hypothetical protein	102	102	1	1	10468				200	200	200	DGJMBLJC_02727	HFDHOMNF_03020	ALEPGING_03425	GEOGNNEI_02751	BINKDPLB_01879	IPPPMGOG_00863	NCHKEDON_00919	PLMPIJHD_02719	LIBHOFBA_02531	MFAGDJPO_01339	AICMNGMC_02839	JAGDPAPJ_02774	JICHJFDH_03580	AHEHGMLM_02791	PABJNMJP_04022	MAPHOHON_02393	ONDKMJBG_03152	JDGDJJKN_03042	KLMHLHPE_02243	EGICBAEE_01370	LNEFCFII_01973	NILJAHBC_02407	KCIFOFJF_03333	CJCKLIFP_01480	IABBECJM_01764	LANDOHOG_01946	LOGCBOHO_02169	DKGFALGN_02437	PNFFMGCL_01801	BJCGHIIB_01913	NHHDDJBG_01719	LBLHELLM_01012	CGJPMKCI_01958	JOHJONHN_02166	CNEDDIJH_01512	JLJGJGIB_01426
uspE		Universal stress protein E	102	102	1	1	7263				947	947	947	DGJMBLJC_04123	HFDHOMNF_00668	ALEPGING_03697	GEOGNNEI_00561	BINKDPLB_00952	IPPPMGOG_01572	NCHKEDON_00578	PLMPIJHD_00420	LIBHOFBA_00229	MFAGDJPO_00420	AICMNGMC_00420	JAGDPAPJ_00563	JICHJFDH_00552	AHEHGMLM_00568	PABJNMJP_01079	MAPHOHON_00563	ONDKMJBG_01404	JDGDJJKN_02142	KLMHLHPE_00303	EGICBAEE_00165	LNEFCFII_00613	NILJAHBC_00614	KCIFOFJF_00564	CJCKLIFP_00614	IABBECJM_00564	LANDOHOG_00563	LOGCBOHO_00563	DKGFALGN_00613	PNFFMGCL_00561	BJCGHIIB_00039	NHHDDJBG_01616	LBLHELLM_01781	CGJPMKCI_00625	JOHJONHN_00338	CNEDDIJH_00465	JLJGJGIB_00170
purF		Amidophosphoribosyltransferase	102	102	1	1	10065				1517	1544	1517	DGJMBLJC_02273	HFDHOMNF_04590	ALEPGING_02261	GEOGNNEI_02548	BINKDPLB_00915	IPPPMGOG_00695	NCHKEDON_00724	PLMPIJHD_02524	LIBHOFBA_02335	MFAGDJPO_01144	AICMNGMC_02644	JAGDPAPJ_02579	JICHJFDH_03189	AHEHGMLM_01240	PABJNMJP_03827	MAPHOHON_02587	ONDKMJBG_02957	JDGDJJKN_02847	KLMHLHPE_02987	EGICBAEE_01176	LNEFCFII_01779	NILJAHBC_02600	KCIFOFJF_02490	CJCKLIFP_01287	IABBECJM_01957	LANDOHOG_01753	LOGCBOHO_02362	DKGFALGN_03199	PNFFMGCL_01924	BJCGHIIB_03131	NHHDDJBG_02830	LBLHELLM_02939	CGJPMKCI_03106	JOHJONHN_01939	CNEDDIJH_02467	JLJGJGIB_03167
yadH		Inner membrane transport permease YadH	102	102	1	1	10848				755	770	769	DGJMBLJC_04756	HFDHOMNF_02611	ALEPGING_01915	GEOGNNEI_03309	BINKDPLB_00585	IPPPMGOG_00185	NCHKEDON_01116	PLMPIJHD_03552	LIBHOFBA_03327	MFAGDJPO_02652	AICMNGMC_03573	JAGDPAPJ_03570	JICHJFDH_01420	AHEHGMLM_00073	PABJNMJP_04537	MAPHOHON_01795	ONDKMJBG_00458	JDGDJJKN_02264	KLMHLHPE_01739	EGICBAEE_01565	LNEFCFII_02168	NILJAHBC_01743	KCIFOFJF_01507	CJCKLIFP_01676	IABBECJM_02396	LANDOHOG_02395	LOGCBOHO_01973	DKGFALGN_01955	PNFFMGCL_02152	BJCGHIIB_01773	NHHDDJBG_01327	LBLHELLM_01459	CGJPMKCI_01763	JOHJONHN_01692	CNEDDIJH_01372	JLJGJGIB_01231
galE		UDP-glucose 4-epimerase	102	102	1	1	5133				1016	1016	1016	DGJMBLJC_02449	HFDHOMNF_02238	ALEPGING_02910	GEOGNNEI_02255	BINKDPLB_02430	IPPPMGOG_00591	NCHKEDON_02014	PLMPIJHD_02846	LIBHOFBA_02658	MFAGDJPO_02276	AICMNGMC_01770	JAGDPAPJ_02417	JICHJFDH_01778	AHEHGMLM_04398	PABJNMJP_03120	MAPHOHON_04411	ONDKMJBG_02373	JDGDJJKN_00691	KLMHLHPE_04316	EGICBAEE_04309	LNEFCFII_04384	NILJAHBC_04375	KCIFOFJF_04328	CJCKLIFP_04381	IABBECJM_04424	LANDOHOG_04371	LOGCBOHO_04463	DKGFALGN_04588	PNFFMGCL_03979	BJCGHIIB_04152	NHHDDJBG_03923	LBLHELLM_03788	CGJPMKCI_03973	JOHJONHN_04260	CNEDDIJH_04111	JLJGJGIB_03837
znuC		Zinc import ATP-binding protein ZnuC	102	102	1	1	8927				755	755	755	DGJMBLJC_03116	HFDHOMNF_00908	ALEPGING_04269	GEOGNNEI_00330	BINKDPLB_03232	IPPPMGOG_02433	NCHKEDON_03975	PLMPIJHD_00188	LIBHOFBA_03425	MFAGDJPO_00188	AICMNGMC_00188	JAGDPAPJ_00331	JICHJFDH_00322	AHEHGMLM_00800	PABJNMJP_00847	MAPHOHON_00331	ONDKMJBG_01635	JDGDJJKN_01901	KLMHLHPE_00072	EGICBAEE_02227	LNEFCFII_00844	NILJAHBC_00846	KCIFOFJF_00331	CJCKLIFP_00846	IABBECJM_00331	LANDOHOG_00330	LOGCBOHO_00330	DKGFALGN_00844	PNFFMGCL_00330	BJCGHIIB_01323	NHHDDJBG_02029	LBLHELLM_01966	CGJPMKCI_00855	JOHJONHN_00106	CNEDDIJH_01147	JLJGJGIB_00400
rlmN		Dual-specificity RNA methyltransferase RlmN	102	102	1	1	10572				1166	1166	1166	DGJMBLJC_00952	HFDHOMNF_02975	ALEPGING_00814	GEOGNNEI_02791	BINKDPLB_01919	IPPPMGOG_01400	NCHKEDON_00959	PLMPIJHD_02759	LIBHOFBA_02571	MFAGDJPO_01379	AICMNGMC_02879	JAGDPAPJ_02814	JICHJFDH_03539	AHEHGMLM_02147	PABJNMJP_04062	MAPHOHON_03871	ONDKMJBG_03194	JDGDJJKN_03089	KLMHLHPE_02283	EGICBAEE_01410	LNEFCFII_02013	NILJAHBC_02366	KCIFOFJF_03292	CJCKLIFP_01521	IABBECJM_01723	LANDOHOG_01987	LOGCBOHO_02128	DKGFALGN_02477	PNFFMGCL_01761	BJCGHIIB_01953	NHHDDJBG_01759	LBLHELLM_00972	CGJPMKCI_01918	JOHJONHN_02126	CNEDDIJH_01552	JLJGJGIB_01386
gldA_2		Glycerol dehydrogenase	102	102	1	1	15611				1097	1103	1102	DGJMBLJC_00806	HFDHOMNF_01738	ALEPGING_01526	GEOGNNEI_02191	BINKDPLB_02244	IPPPMGOG_03594	NCHKEDON_03195	PLMPIJHD_02315	LIBHOFBA_02124	MFAGDJPO_02110	AICMNGMC_02235	JAGDPAPJ_02308	JICHJFDH_03916	AHEHGMLM_02386	PABJNMJP_04743	MAPHOHON_04350	ONDKMJBG_04530	JDGDJJKN_03903	KLMHLHPE_03809	EGICBAEE_04295	LNEFCFII_04283	NILJAHBC_04286	KCIFOFJF_04161	CJCKLIFP_04253	IABBECJM_04335	LANDOHOG_04282	LOGCBOHO_04334	DKGFALGN_04157	PNFFMGCL_02947	BJCGHIIB_03088	NHHDDJBG_03257	LBLHELLM_03120	CGJPMKCI_03360	JOHJONHN_04573	CNEDDIJH_03859	JLJGJGIB_04026
rph		Ribonuclease PH	102	102	1	1	14081				716	716	716	DGJMBLJC_02102	HFDHOMNF_04070	ALEPGING_03606	GEOGNNEI_03748	BINKDPLB_04047	IPPPMGOG_02729	NCHKEDON_02499	PLMPIJHD_04028	LIBHOFBA_04113	MFAGDJPO_03838	AICMNGMC_02454	JAGDPAPJ_04028	JICHJFDH_01008	AHEHGMLM_01430	PABJNMJP_03580	MAPHOHON_02770	ONDKMJBG_04119	JDGDJJKN_03244	KLMHLHPE_02436	EGICBAEE_03164	LNEFCFII_02807	NILJAHBC_03096	KCIFOFJF_02952	CJCKLIFP_03053	IABBECJM_03096	LANDOHOG_03094	LOGCBOHO_02780	DKGFALGN_02673	PNFFMGCL_02512	BJCGHIIB_02316	NHHDDJBG_02126	LBLHELLM_02276	CGJPMKCI_02831	JOHJONHN_02502	CNEDDIJH_02223	JLJGJGIB_02433
pdhR_3		Pyruvate dehydrogenase complex repressor	102	102	1	1	10895				752	764	763	DGJMBLJC_04728	HFDHOMNF_02581	ALEPGING_01892	GEOGNNEI_03286	BINKDPLB_00562	IPPPMGOG_00162	NCHKEDON_01139	PLMPIJHD_03529	LIBHOFBA_03304	MFAGDJPO_02629	AICMNGMC_03550	JAGDPAPJ_03547	JICHJFDH_01443	AHEHGMLM_00096	PABJNMJP_04514	MAPHOHON_01772	ONDKMJBG_00435	JDGDJJKN_02292	KLMHLHPE_01716	EGICBAEE_01588	LNEFCFII_02191	NILJAHBC_01720	KCIFOFJF_01484	CJCKLIFP_01699	IABBECJM_02373	LANDOHOG_02372	LOGCBOHO_01950	DKGFALGN_01932	PNFFMGCL_02129	BJCGHIIB_01750	NHHDDJBG_01350	LBLHELLM_01436	CGJPMKCI_01740	JOHJONHN_01715	CNEDDIJH_01349	JLJGJGIB_01208
metF		5,10-methylenetetrahydrofolate reductase	102	102	1	1	15604				890	890	890	DGJMBLJC_00809	HFDHOMNF_01741	ALEPGING_01529	GEOGNNEI_02194	BINKDPLB_02247	IPPPMGOG_03597	NCHKEDON_03198	PLMPIJHD_02318	LIBHOFBA_02127	MFAGDJPO_02113	AICMNGMC_02238	JAGDPAPJ_02311	JICHJFDH_03919	AHEHGMLM_02389	PABJNMJP_04746	MAPHOHON_04347	ONDKMJBG_04527	JDGDJJKN_03906	KLMHLHPE_03806	EGICBAEE_04292	LNEFCFII_04286	NILJAHBC_04283	KCIFOFJF_04164	CJCKLIFP_04256	IABBECJM_04332	LANDOHOG_04279	LOGCBOHO_04331	DKGFALGN_04154	PNFFMGCL_02950	BJCGHIIB_03085	NHHDDJBG_03254	LBLHELLM_03123	CGJPMKCI_03363	JOHJONHN_04576	CNEDDIJH_03862	JLJGJGIB_04029
pcm		Protein-L-isoaspartate O-methyltransferase	102	102	1	1	2016				626	626	626	DGJMBLJC_01393	HFDHOMNF_03536	ALEPGING_00731	GEOGNNEI_01396	BINKDPLB_00157	IPPPMGOG_01000	NCHKEDON_01300	PLMPIJHD_01190	LIBHOFBA_01000	MFAGDJPO_03168	AICMNGMC_01191	JAGDPAPJ_01334	JICHJFDH_00200	AHEHGMLM_02466	PABJNMJP_00294	MAPHOHON_02165	ONDKMJBG_00691	JDGDJJKN_01492	KLMHLHPE_01210	EGICBAEE_00866	LNEFCFII_01374	NILJAHBC_02019	KCIFOFJF_01852	CJCKLIFP_02162	IABBECJM_01377	LANDOHOG_01444	LOGCBOHO_01444	DKGFALGN_01469	PNFFMGCL_01526	BJCGHIIB_01004	NHHDDJBG_00157	LBLHELLM_00158	CGJPMKCI_01166	JOHJONHN_00920	CNEDDIJH_00712	JLJGJGIB_00662
fieF		Ferrous-iron efflux pump FieF	102	102	1	1	15534				896	902	901	DGJMBLJC_00846	HFDHOMNF_01786	ALEPGING_01372	GEOGNNEI_02238	BINKDPLB_02291	IPPPMGOG_03641	NCHKEDON_03242	PLMPIJHD_02362	LIBHOFBA_02171	MFAGDJPO_02157	AICMNGMC_02282	JAGDPAPJ_02355	JICHJFDH_03963	AHEHGMLM_02433	PABJNMJP_04790	MAPHOHON_04303	ONDKMJBG_04483	JDGDJJKN_03953	KLMHLHPE_03762	EGICBAEE_04248	LNEFCFII_04330	NILJAHBC_04239	KCIFOFJF_04208	CJCKLIFP_04300	IABBECJM_04288	LANDOHOG_04235	LOGCBOHO_04286	DKGFALGN_04110	PNFFMGCL_02994	BJCGHIIB_03041	NHHDDJBG_03210	LBLHELLM_03167	CGJPMKCI_03407	JOHJONHN_03042	CNEDDIJH_03906	JLJGJGIB_03340
secG		Protein-export membrane protein SecG	102	102	1	1	13429				332	332	332	DGJMBLJC_01564	HFDHOMNF_01211	ALEPGING_01351	GEOGNNEI_01842	BINKDPLB_03543	IPPPMGOG_03579	NCHKEDON_01413	PLMPIJHD_01767	LIBHOFBA_01576	MFAGDJPO_01748	AICMNGMC_01626	JAGDPAPJ_01769	JICHJFDH_03901	AHEHGMLM_04221	PABJNMJP_02362	MAPHOHON_03290	ONDKMJBG_03482	JDGDJJKN_01088	KLMHLHPE_04111	EGICBAEE_03820	LNEFCFII_03899	NILJAHBC_03917	KCIFOFJF_03832	CJCKLIFP_03619	IABBECJM_03662	LANDOHOG_03916	LOGCBOHO_03517	DKGFALGN_03537	PNFFMGCL_03252	BJCGHIIB_03507	NHHDDJBG_03493	LBLHELLM_03451	CGJPMKCI_03487	JOHJONHN_03753	CNEDDIJH_03275	JLJGJGIB_03444
group_18839		hypothetical protein	102	102	1	1	16117				197	197	197	DGJMBLJC_00302	HFDHOMNF_02180	ALEPGING_01991	GEOGNNEI_03451	BINKDPLB_04358	IPPPMGOG_02904	NCHKEDON_04367	PLMPIJHD_03725	LIBHOFBA_03815	MFAGDJPO_03535	AICMNGMC_03725	JAGDPAPJ_03726	JICHJFDH_02727	AHEHGMLM_01782	PABJNMJP_00629	MAPHOHON_01356	ONDKMJBG_02149	JDGDJJKN_02679	KLMHLHPE_03604	EGICBAEE_02663	LNEFCFII_02554	NILJAHBC_01356	KCIFOFJF_02778	CJCKLIFP_02799	IABBECJM_02965	LANDOHOG_02963	LOGCBOHO_02527	DKGFALGN_03049	PNFFMGCL_03438	BJCGHIIB_04031	NHHDDJBG_03903	LBLHELLM_03621	CGJPMKCI_03852	JOHJONHN_04148	CNEDDIJH_03971	JLJGJGIB_03615
rsmA		Ribosomal RNA small subunit methyltransferase A	102	102	1	1	10989				821	821	821	DGJMBLJC_04662	HFDHOMNF_02512	ALEPGING_01771	GEOGNNEI_03223	BINKDPLB_00499	IPPPMGOG_00099	NCHKEDON_01202	PLMPIJHD_03466	LIBHOFBA_03241	MFAGDJPO_02566	AICMNGMC_03487	JAGDPAPJ_03484	JICHJFDH_01507	AHEHGMLM_00159	PABJNMJP_04451	MAPHOHON_01709	ONDKMJBG_00372	JDGDJJKN_02355	KLMHLHPE_01653	EGICBAEE_01651	LNEFCFII_02254	NILJAHBC_01657	KCIFOFJF_01421	CJCKLIFP_01762	IABBECJM_02310	LANDOHOG_02309	LOGCBOHO_01887	DKGFALGN_01869	PNFFMGCL_02066	BJCGHIIB_01687	NHHDDJBG_01413	LBLHELLM_01373	CGJPMKCI_01677	JOHJONHN_01778	CNEDDIJH_01286	JLJGJGIB_01145
mepS_2		Murein DD-endopeptidase MepS/Murein LD-carboxypeptidase	102	102	1	1	9777				572	572	572	DGJMBLJC_03687	HFDHOMNF_01544	ALEPGING_02577	GEOGNNEI_00021	BINKDPLB_00784	IPPPMGOG_01504	NCHKEDON_02271	PLMPIJHD_04713	LIBHOFBA_03734	MFAGDJPO_04466	AICMNGMC_04522	JAGDPAPJ_00022	JICHJFDH_01748	AHEHGMLM_01109	PABJNMJP_03457	MAPHOHON_00022	ONDKMJBG_01944	JDGDJJKN_04104	KLMHLHPE_02121	EGICBAEE_01917	LNEFCFII_01153	NILJAHBC_01155	KCIFOFJF_00022	CJCKLIFP_01155	IABBECJM_00022	LANDOHOG_00021	LOGCBOHO_00021	DKGFALGN_01153	PNFFMGCL_00021	BJCGHIIB_01632	NHHDDJBG_00784	LBLHELLM_03974	CGJPMKCI_01622	JOHJONHN_01423	CNEDDIJH_02790	JLJGJGIB_00917
fliA		RNA polymerase sigma factor FliA	102	102	1	1	9048				719	719	719	DGJMBLJC_03045	HFDHOMNF_00974	ALEPGING_00840	GEOGNNEI_00268	BINKDPLB_03294	IPPPMGOG_02495	NCHKEDON_04037	PLMPIJHD_00126	LIBHOFBA_03487	MFAGDJPO_00126	AICMNGMC_00126	JAGDPAPJ_00269	JICHJFDH_02268	AHEHGMLM_00862	PABJNMJP_00785	MAPHOHON_00269	ONDKMJBG_01697	JDGDJJKN_01839	KLMHLHPE_01874	EGICBAEE_02165	LNEFCFII_00906	NILJAHBC_00908	KCIFOFJF_00269	CJCKLIFP_00908	IABBECJM_00269	LANDOHOG_00268	LOGCBOHO_00268	DKGFALGN_00906	PNFFMGCL_00268	BJCGHIIB_01385	NHHDDJBG_03671	LBLHELLM_03849	CGJPMKCI_01375	JOHJONHN_00044	CNEDDIJH_01208	JLJGJGIB_00462
ribH		6,7-dimethyl-8-ribityllumazine synthase	102	102	1	1	477				470	470	470	DGJMBLJC_04906	HFDHOMNF_01716	ALEPGING_03806	GEOGNNEI_01828	BINKDPLB_01770	IPPPMGOG_00439	NCHKEDON_03117	PLMPIJHD_01622	LIBHOFBA_01431	MFAGDJPO_01602	AICMNGMC_04679	JAGDPAPJ_04733	JICHJFDH_02659	AHEHGMLM_04418	PABJNMJP_02030	MAPHOHON_03652	ONDKMJBG_04333	JDGDJJKN_03681	KLMHLHPE_03411	EGICBAEE_02431	LNEFCFII_03421	NILJAHBC_02846	KCIFOFJF_02144	CJCKLIFP_02606	IABBECJM_02648	LANDOHOG_02608	LOGCBOHO_03717	DKGFALGN_02207	PNFFMGCL_03107	BJCGHIIB_03374	NHHDDJBG_02872	LBLHELLM_03110	CGJPMKCI_03218	JOHJONHN_02793	CNEDDIJH_02947	JLJGJGIB_02969
crcB		Putative fluoride ion transporter CrcB	102	102	1	1	4916				383	383	383	DGJMBLJC_01044	HFDHOMNF_03205	ALEPGING_00057	GEOGNNEI_04064	BINKDPLB_03819	IPPPMGOG_03109	NCHKEDON_04584	PLMPIJHD_04174	LIBHOFBA_04257	MFAGDJPO_04049	AICMNGMC_03977	JAGDPAPJ_04168	JICHJFDH_02912	AHEHGMLM_00292	PABJNMJP_02791	MAPHOHON_03729	ONDKMJBG_03747	JDGDJJKN_00825	KLMHLHPE_02850	EGICBAEE_03362	LNEFCFII_02989	NILJAHBC_03508	KCIFOFJF_03150	CJCKLIFP_03465	IABBECJM_03448	LANDOHOG_03446	LOGCBOHO_03192	DKGFALGN_02811	PNFFMGCL_03571	BJCGHIIB_02667	NHHDDJBG_03325	LBLHELLM_01678	CGJPMKCI_02693	JOHJONHN_03390	CNEDDIJH_04046	JLJGJGIB_03787
tusE		Sulfurtransferase TusE	102	102	1	1	5694				329	329	329	DGJMBLJC_02950	HFDHOMNF_00041	ALEPGING_03486	GEOGNNEI_01139	BINKDPLB_04158	IPPPMGOG_04261	NCHKEDON_02817	PLMPIJHD_00997	LIBHOFBA_00809	MFAGDJPO_00999	AICMNGMC_01000	JAGDPAPJ_01143	JICHJFDH_02814	AHEHGMLM_01692	PABJNMJP_01659	MAPHOHON_01143	ONDKMJBG_00824	JDGDJJKN_00489	KLMHLHPE_00882	EGICBAEE_03013	LNEFCFII_00034	NILJAHBC_00034	KCIFOFJF_01144	CJCKLIFP_00034	IABBECJM_01144	LANDOHOG_01143	LOGCBOHO_01143	DKGFALGN_00034	PNFFMGCL_01199	BJCGHIIB_00676	NHHDDJBG_03106	LBLHELLM_00486	CGJPMKCI_00034	JOHJONHN_01110	CNEDDIJH_02647	JLJGJGIB_02799
nhaB		Na(+)/H(+) antiporter NhaB	102	102	1	1	7545				455	1544	1517	DGJMBLJC_03204	HFDHOMNF_00823	ALEPGING_00218	GEOGNNEI_00415	BINKDPLB_01098	IPPPMGOG_02349	NCHKEDON_03891	PLMPIJHD_00273	LIBHOFBA_00082	MFAGDJPO_00273	AICMNGMC_00273	JAGDPAPJ_00416	JICHJFDH_00407	AHEHGMLM_00715	PABJNMJP_00932	MAPHOHON_00416	ONDKMJBG_01551	JDGDJJKN_01984	KLMHLHPE_00157	EGICBAEE_00018	LNEFCFII_00760	NILJAHBC_00762	KCIFOFJF_00416	CJCKLIFP_00762	IABBECJM_00416	LANDOHOG_00415	LOGCBOHO_00415	DKGFALGN_00760	PNFFMGCL_00415	BJCGHIIB_01239	NHHDDJBG_01945	LBLHELLM_02051	CGJPMKCI_00771	JOHJONHN_00191	CNEDDIJH_01063	JLJGJGIB_00316
dadA_1		D-amino acid dehydrogenase	102	102	1	1	7542				230	2381	1308	DGJMBLJC_03207	HFDHOMNF_00820	ALEPGING_00221	GEOGNNEI_00418	BINKDPLB_01095	IPPPMGOG_02346	NCHKEDON_03888	PLMPIJHD_00276	LIBHOFBA_00085	MFAGDJPO_00276	AICMNGMC_00276	JAGDPAPJ_00419	JICHJFDH_00410	AHEHGMLM_00712	PABJNMJP_00935	MAPHOHON_00419	ONDKMJBG_01548	JDGDJJKN_01987	KLMHLHPE_00160	EGICBAEE_00021	LNEFCFII_00757	NILJAHBC_00759	KCIFOFJF_00419	CJCKLIFP_00759	IABBECJM_00419	LANDOHOG_00418	LOGCBOHO_00418	DKGFALGN_00757	PNFFMGCL_00418	BJCGHIIB_01236	NHHDDJBG_01942	LBLHELLM_02054	CGJPMKCI_00768	JOHJONHN_00194	CNEDDIJH_01060	JLJGJGIB_00313
ansA		L-asparaginase 1	102	102	1	1	6127				830	1088	1080	DGJMBLJC_03829	HFDHOMNF_00262	ALEPGING_01197	GEOGNNEI_00933	BINKDPLB_02194	IPPPMGOG_01944	NCHKEDON_00206	PLMPIJHD_00790	LIBHOFBA_00602	MFAGDJPO_00792	AICMNGMC_00793	JAGDPAPJ_00936	JICHJFDH_04220	AHEHGMLM_02905	PABJNMJP_01451	MAPHOHON_00935	ONDKMJBG_01032	JDGDJJKN_00281	KLMHLHPE_00675	EGICBAEE_00537	LNEFCFII_00241	NILJAHBC_00242	KCIFOFJF_00936	CJCKLIFP_00242	IABBECJM_00936	LANDOHOG_00935	LOGCBOHO_00935	DKGFALGN_00241	PNFFMGCL_00993	BJCGHIIB_00470	NHHDDJBG_00653	LBLHELLM_00692	CGJPMKCI_00240	JOHJONHN_01317	CNEDDIJH_00093	JLJGJGIB_03066
bhsA		Multiple stress resistance protein BhsA	102	102	1	1	5957				257	338	258	DGJMBLJC_03919	HFDHOMNF_00180	ALEPGING_03143	GEOGNNEI_01013	BINKDPLB_04285	IPPPMGOG_02024	NCHKEDON_00126	PLMPIJHD_00870	LIBHOFBA_00682	MFAGDJPO_00872	AICMNGMC_00873	JAGDPAPJ_01016	JICHJFDH_01292	AHEHGMLM_01564	PABJNMJP_01531	MAPHOHON_01015	ONDKMJBG_00952	JDGDJJKN_00358	KLMHLHPE_00755	EGICBAEE_02886	LNEFCFII_00161	NILJAHBC_00162	KCIFOFJF_01016	CJCKLIFP_00162	IABBECJM_01016	LANDOHOG_01015	LOGCBOHO_01015	DKGFALGN_00161	PNFFMGCL_01073	BJCGHIIB_00550	NHHDDJBG_00733	LBLHELLM_00612	CGJPMKCI_00160	JOHJONHN_01237	CNEDDIJH_00013	JLJGJGIB_02986
ydcP_1		putative protease YdcP	102	102	1	1	7156				905	2006	1954	DGJMBLJC_04191	HFDHOMNF_00608	ALEPGING_01670	GEOGNNEI_00618	BINKDPLB_02772	IPPPMGOG_01629	NCHKEDON_00521	PLMPIJHD_00477	LIBHOFBA_00286	MFAGDJPO_00477	AICMNGMC_00477	JAGDPAPJ_00620	JICHJFDH_00610	AHEHGMLM_00511	PABJNMJP_01136	MAPHOHON_00620	ONDKMJBG_01347	JDGDJJKN_02204	KLMHLHPE_00360	EGICBAEE_00222	LNEFCFII_00556	NILJAHBC_00557	KCIFOFJF_00621	CJCKLIFP_00557	IABBECJM_00621	LANDOHOG_00620	LOGCBOHO_00620	DKGFALGN_00556	PNFFMGCL_00618	BJCGHIIB_00096	NHHDDJBG_01559	LBLHELLM_01838	CGJPMKCI_00568	JOHJONHN_00395	CNEDDIJH_00408	JLJGJGIB_00113
ugd		UDP-glucose 6-dehydrogenase	102	102	1	1	9473				878	1268	1164	DGJMBLJC_04409	HFDHOMNF_01104	ALEPGING_04354	GEOGNNEI_00146	BINKDPLB_02940	IPPPMGOG_02617	NCHKEDON_04159	PLMPIJHD_00004	LIBHOFBA_03609	MFAGDJPO_00004	AICMNGMC_00004	JAGDPAPJ_00147	JICHJFDH_01623	AHEHGMLM_00984	PABJNMJP_03332	MAPHOHON_00147	ONDKMJBG_01819	JDGDJJKN_01699	KLMHLHPE_01996	EGICBAEE_02043	LNEFCFII_01028	NILJAHBC_01030	KCIFOFJF_00147	CJCKLIFP_01030	IABBECJM_00147	LANDOHOG_00146	LOGCBOHO_00146	DKGFALGN_01028	PNFFMGCL_00146	BJCGHIIB_01507	NHHDDJBG_00909	LBLHELLM_03241	CGJPMKCI_01497	JOHJONHN_01548	CNEDDIJH_03786	JLJGJGIB_01042
group_2046		hypothetical protein	102	102	1	1	9567				674	746	745	DGJMBLJC_04450	HFDHOMNF_01433	ALEPGING_04109	GEOGNNEI_00124	BINKDPLB_00681	IPPPMGOG_02627	NCHKEDON_02374	PLMPIJHD_04610	LIBHOFBA_03631	MFAGDJPO_04363	AICMNGMC_04418	JAGDPAPJ_00125	JICHJFDH_01645	AHEHGMLM_01006	PABJNMJP_03354	MAPHOHON_00125	ONDKMJBG_01841	JDGDJJKN_04242	KLMHLHPE_02018	EGICBAEE_02020	LNEFCFII_01050	NILJAHBC_01052	KCIFOFJF_00125	CJCKLIFP_01052	IABBECJM_00125	LANDOHOG_00124	LOGCBOHO_00124	DKGFALGN_01050	PNFFMGCL_00124	BJCGHIIB_01529	NHHDDJBG_00887	LBLHELLM_01542	CGJPMKCI_01519	JOHJONHN_01526	CNEDDIJH_02687	JLJGJGIB_01020
prpD		2-methylcitrate dehydratase	102	102	1	1	552				1226	1451	1448	DGJMBLJC_04962	HFDHOMNF_04383	ALEPGING_02392	GEOGNNEI_04315	BINKDPLB_02620	IPPPMGOG_00391	NCHKEDON_03165	PLMPIJHD_04426	LIBHOFBA_04509	MFAGDJPO_04301	AICMNGMC_04234	JAGDPAPJ_04419	JICHJFDH_02589	AHEHGMLM_03181	PABJNMJP_02163	MAPHOHON_03101	ONDKMJBG_02525	JDGDJJKN_03634	KLMHLHPE_03230	EGICBAEE_02479	LNEFCFII_03240	NILJAHBC_02894	KCIFOFJF_02192	CJCKLIFP_02558	IABBECJM_02600	LANDOHOG_02656	LOGCBOHO_03299	DKGFALGN_02159	PNFFMGCL_02842	BJCGHIIB_02833	NHHDDJBG_02623	LBLHELLM_02788	CGJPMKCI_03030	JOHJONHN_02662	CNEDDIJH_02132	JLJGJGIB_02258
yjjP		Inner membrane protein YjjP	102	102	1	1	11280				644	944	932	DGJMBLJC_00114	HFDHOMNF_02363	ALEPGING_00767	GEOGNNEI_03084	BINKDPLB_01207	IPPPMGOG_04377	NCHKEDON_03522	PLMPIJHD_03327	LIBHOFBA_03102	MFAGDJPO_02427	AICMNGMC_03348	JAGDPAPJ_03345	JICHJFDH_02017	AHEHGMLM_00200	PABJNMJP_04260	MAPHOHON_01518	ONDKMJBG_00181	JDGDJJKN_02497	KLMHLHPE_01514	EGICBAEE_01790	LNEFCFII_02393	NILJAHBC_01518	KCIFOFJF_01282	CJCKLIFP_01901	IABBECJM_02171	LANDOHOG_02170	LOGCBOHO_01748	DKGFALGN_01730	PNFFMGCL_02333	BJCGHIIB_02136	NHHDDJBG_01146	LBLHELLM_01221	CGJPMKCI_02126	JOHJONHN_02323	CNEDDIJH_01735	JLJGJGIB_01583
valS		Valine--tRNA ligase	102	102	1	1	16288				626	2855	2832	DGJMBLJC_00184	HFDHOMNF_02305	ALEPGING_03510	GEOGNNEI_03031	BINKDPLB_01154	IPPPMGOG_04430	NCHKEDON_03469	PLMPIJHD_03274	LIBHOFBA_03049	MFAGDJPO_02374	AICMNGMC_03295	JAGDPAPJ_03292	JICHJFDH_02408	AHEHGMLM_02017	PABJNMJP_04207	MAPHOHON_01465	ONDKMJBG_00128	JDGDJJKN_02572	KLMHLHPE_01461	EGICBAEE_01843	LNEFCFII_02446	NILJAHBC_01465	KCIFOFJF_01229	CJCKLIFP_01954	IABBECJM_02118	LANDOHOG_02117	LOGCBOHO_01695	DKGFALGN_01677	PNFFMGCL_02280	BJCGHIIB_02190	NHHDDJBG_01080	LBLHELLM_01287	CGJPMKCI_02179	JOHJONHN_02376	CNEDDIJH_01788	JLJGJGIB_01636
ulaE_2		L-ribulose-5-phosphate 3-epimerase UlaE	102	102	1	1	16151				854	908	854	DGJMBLJC_00279	HFDHOMNF_02154	ALEPGING_00367	GEOGNNEI_03428	BINKDPLB_04335	IPPPMGOG_02881	NCHKEDON_04390	PLMPIJHD_03702	LIBHOFBA_03792	MFAGDJPO_03512	AICMNGMC_03702	JAGDPAPJ_03703	JICHJFDH_02750	AHEHGMLM_01759	PABJNMJP_00652	MAPHOHON_01379	ONDKMJBG_02126	JDGDJJKN_02657	KLMHLHPE_03581	EGICBAEE_02640	LNEFCFII_02531	NILJAHBC_01379	KCIFOFJF_02801	CJCKLIFP_02776	IABBECJM_02988	LANDOHOG_02986	LOGCBOHO_02504	DKGFALGN_03072	PNFFMGCL_03415	BJCGHIIB_04008	NHHDDJBG_03880	LBLHELLM_03644	CGJPMKCI_03829	JOHJONHN_04125	CNEDDIJH_03948	JLJGJGIB_03638
psd		Phosphatidylserine decarboxylase proenzyme	102	102	1	1	16096				695	986	965	DGJMBLJC_00318	HFDHOMNF_04334	ALEPGING_01976	GEOGNNEI_03468	BINKDPLB_04375	IPPPMGOG_02921	NCHKEDON_04350	PLMPIJHD_03742	LIBHOFBA_03832	MFAGDJPO_03552	AICMNGMC_03742	JAGDPAPJ_03743	JICHJFDH_02710	AHEHGMLM_01799	PABJNMJP_00612	MAPHOHON_01339	ONDKMJBG_02166	JDGDJJKN_02696	KLMHLHPE_03621	EGICBAEE_02680	LNEFCFII_02571	NILJAHBC_01339	KCIFOFJF_02761	CJCKLIFP_02816	IABBECJM_02948	LANDOHOG_02946	LOGCBOHO_02544	DKGFALGN_03032	PNFFMGCL_03455	BJCGHIIB_03833	NHHDDJBG_02417	LBLHELLM_02524	CGJPMKCI_02405	JOHJONHN_04211	CNEDDIJH_01843	JLJGJGIB_01861
ybdM		putative protein YbdM	102	102	1	1	4852				617	617	617	DGJMBLJC_00641	HFDHOMNF_03231	ALEPGING_00083	GEOGNNEI_04038	BINKDPLB_03793	IPPPMGOG_03083	NCHKEDON_04558	PLMPIJHD_04148	LIBHOFBA_04231	MFAGDJPO_04023	AICMNGMC_03951	JAGDPAPJ_04142	JICHJFDH_02886	AHEHGMLM_00318	PABJNMJP_02765	MAPHOHON_03755	ONDKMJBG_03773	JDGDJJKN_00851	KLMHLHPE_02876	EGICBAEE_03388	LNEFCFII_02963	NILJAHBC_03534	KCIFOFJF_03176	CJCKLIFP_03491	IABBECJM_03422	LANDOHOG_03420	LOGCBOHO_03218	DKGFALGN_02785	PNFFMGCL_03545	BJCGHIIB_02641	NHHDDJBG_03299	LBLHELLM_01704	CGJPMKCI_02719	JOHJONHN_03364	CNEDDIJH_04004	JLJGJGIB_03709
cptA		Phosphoethanolamine transferase CptA	102	102	1	1	15615				1184	1733	1719	DGJMBLJC_00795	HFDHOMNF_01734	ALEPGING_01522	GEOGNNEI_02187	BINKDPLB_02240	IPPPMGOG_03590	NCHKEDON_03191	PLMPIJHD_02311	LIBHOFBA_02120	MFAGDJPO_02106	AICMNGMC_02231	JAGDPAPJ_02304	JICHJFDH_03912	AHEHGMLM_02382	PABJNMJP_04739	MAPHOHON_04354	ONDKMJBG_04534	JDGDJJKN_03899	KLMHLHPE_03813	EGICBAEE_04299	LNEFCFII_04279	NILJAHBC_04290	KCIFOFJF_04157	CJCKLIFP_04249	IABBECJM_04339	LANDOHOG_04286	LOGCBOHO_04338	DKGFALGN_04161	PNFFMGCL_02943	BJCGHIIB_03092	NHHDDJBG_03261	LBLHELLM_03116	CGJPMKCI_03356	JOHJONHN_04569	CNEDDIJH_03855	JLJGJGIB_04022
group_2300		hypothetical protein	102	102	1	1	15561				155	446	424	DGJMBLJC_00834	HFDHOMNF_01764	ALEPGING_01552	GEOGNNEI_02217	BINKDPLB_02270	IPPPMGOG_03620	NCHKEDON_03221	PLMPIJHD_02341	LIBHOFBA_02150	MFAGDJPO_02136	AICMNGMC_02261	JAGDPAPJ_02334	JICHJFDH_03942	AHEHGMLM_02412	PABJNMJP_04769	MAPHOHON_04324	ONDKMJBG_04504	JDGDJJKN_03932	KLMHLHPE_03783	EGICBAEE_04269	LNEFCFII_04309	NILJAHBC_04260	KCIFOFJF_04187	CJCKLIFP_04279	IABBECJM_04309	LANDOHOG_04256	LOGCBOHO_04307	DKGFALGN_04131	PNFFMGCL_02973	BJCGHIIB_03062	NHHDDJBG_03231	LBLHELLM_03146	CGJPMKCI_03386	JOHJONHN_03063	CNEDDIJH_03885	JLJGJGIB_04053
rhaD		Rhamnulose-1-phosphate aldolase	102	102	1	1	15438				644	827	821	DGJMBLJC_00865	HFDHOMNF_01803	ALEPGING_01147	GEOGNNEI_01988	BINKDPLB_01646	IPPPMGOG_03657	NCHKEDON_02072	PLMPIJHD_02022	LIBHOFBA_01830	MFAGDJPO_01889	AICMNGMC_01863	JAGDPAPJ_02022	JICHJFDH_03979	AHEHGMLM_02541	PABJNMJP_03028	MAPHOHON_03937	ONDKMJBG_02428	JDGDJJKN_03969	KLMHLHPE_03746	EGICBAEE_03966	LNEFCFII_04078	NILJAHBC_04095	KCIFOFJF_04004	CJCKLIFP_04104	IABBECJM_04147	LANDOHOG_04094	LOGCBOHO_04142	DKGFALGN_03682	PNFFMGCL_03048	BJCGHIIB_02987	NHHDDJBG_03194	LBLHELLM_03183	CGJPMKCI_03423	JOHJONHN_02984	CNEDDIJH_03452	JLJGJGIB_03286
mltF_1		Membrane-bound lytic murein transglycosylase F	102	102	1	1	10656				554	1544	1525	DGJMBLJC_01002	HFDHOMNF_02927	ALEPGING_02544	GEOGNNEI_02834	BINKDPLB_01962	IPPPMGOG_01443	NCHKEDON_01002	PLMPIJHD_02802	LIBHOFBA_02614	MFAGDJPO_01422	AICMNGMC_02922	JAGDPAPJ_02857	JICHJFDH_03496	AHEHGMLM_02104	PABJNMJP_04105	MAPHOHON_03828	ONDKMJBG_03237	JDGDJJKN_03132	KLMHLHPE_02326	EGICBAEE_01453	LNEFCFII_02056	NILJAHBC_02323	KCIFOFJF_03249	CJCKLIFP_01564	IABBECJM_01680	LANDOHOG_02030	LOGCBOHO_02085	DKGFALGN_02520	PNFFMGCL_01718	BJCGHIIB_01996	NHHDDJBG_01802	LBLHELLM_00929	CGJPMKCI_01875	JOHJONHN_02083	CNEDDIJH_01595	JLJGJGIB_01343
trxB		Thioredoxin reductase	102	102	1	1	5410				455	968	958	DGJMBLJC_01174	HFDHOMNF_01317	ALEPGING_04184	GEOGNNEI_04453	BINKDPLB_03090	IPPPMGOG_03391	NCHKEDON_01603	PLMPIJHD_04564	LIBHOFBA_04647	MFAGDJPO_04583	AICMNGMC_04372	JAGDPAPJ_04557	JICHJFDH_00871	AHEHGMLM_02257	PABJNMJP_01840	MAPHOHON_03419	ONDKMJBG_04232	JDGDJJKN_00560	KLMHLHPE_03311	EGICBAEE_03464	LNEFCFII_03321	NILJAHBC_03667	KCIFOFJF_03452	CJCKLIFP_03776	IABBECJM_03819	LANDOHOG_03608	LOGCBOHO_03674	DKGFALGN_03358	PNFFMGCL_04164	BJCGHIIB_03723	NHHDDJBG_03388	LBLHELLM_04080	CGJPMKCI_03701	JOHJONHN_03656	CNEDDIJH_03178	JLJGJGIB_02646
ybiU		putative protein YbiU	102	102	1	1	5264				1055	1265	1261	DGJMBLJC_01256	HFDHOMNF_01404	ALEPGING_03584	GEOGNNEI_04374	BINKDPLB_01517	IPPPMGOG_03470	NCHKEDON_01524	PLMPIJHD_04485	LIBHOFBA_04568	MFAGDJPO_04504	AICMNGMC_04293	JAGDPAPJ_04478	JICHJFDH_00792	AHEHGMLM_02177	PABJNMJP_01760	MAPHOHON_03499	ONDKMJBG_04312	JDGDJJKN_00629	KLMHLHPE_03390	EGICBAEE_03544	LNEFCFII_03400	NILJAHBC_03588	KCIFOFJF_03373	CJCKLIFP_03697	IABBECJM_03740	LANDOHOG_03687	LOGCBOHO_03595	DKGFALGN_03279	PNFFMGCL_03885	BJCGHIIB_04058	NHHDDJBG_03467	LBLHELLM_03726	CGJPMKCI_03911	JOHJONHN_03577	CNEDDIJH_03098	JLJGJGIB_02567
hypB		Hydrogenase maturation factor HypB	102	102	1	1	2133				872	1034	873	DGJMBLJC_01314	HFDHOMNF_03459	ALEPGING_00969	GEOGNNEI_01326	BINKDPLB_00087	IPPPMGOG_01070	NCHKEDON_01370	PLMPIJHD_01120	LIBHOFBA_00930	MFAGDJPO_03098	AICMNGMC_01121	JAGDPAPJ_01264	JICHJFDH_00130	AHEHGMLM_02637	PABJNMJP_00364	MAPHOHON_02235	ONDKMJBG_00621	JDGDJJKN_01564	KLMHLHPE_01280	EGICBAEE_00936	LNEFCFII_01304	NILJAHBC_01949	KCIFOFJF_01922	CJCKLIFP_02092	IABBECJM_01307	LANDOHOG_01514	LOGCBOHO_01514	DKGFALGN_01539	PNFFMGCL_01596	BJCGHIIB_01074	NHHDDJBG_00087	LBLHELLM_00088	CGJPMKCI_01236	JOHJONHN_00990	CNEDDIJH_00642	JLJGJGIB_00592
mntB_2		Manganese transport system membrane protein MntB	102	102	1	1	2123				440	848	838	DGJMBLJC_01323	HFDHOMNF_03469	ALEPGING_00978	GEOGNNEI_01335	BINKDPLB_00096	IPPPMGOG_01061	NCHKEDON_01361	PLMPIJHD_01129	LIBHOFBA_00939	MFAGDJPO_03107	AICMNGMC_01130	JAGDPAPJ_01273	JICHJFDH_00139	AHEHGMLM_02628	PABJNMJP_00355	MAPHOHON_02226	ONDKMJBG_00630	JDGDJJKN_01555	KLMHLHPE_01271	EGICBAEE_00927	LNEFCFII_01313	NILJAHBC_01958	KCIFOFJF_01913	CJCKLIFP_02101	IABBECJM_01316	LANDOHOG_01505	LOGCBOHO_01505	DKGFALGN_01530	PNFFMGCL_01587	BJCGHIIB_01065	NHHDDJBG_00096	LBLHELLM_00097	CGJPMKCI_01227	JOHJONHN_00981	CNEDDIJH_00651	JLJGJGIB_00601
ispF		2-C-methyl-D-erythritol 2,4-cyclodiphosphate synthase	102	102	1	1	2013				479	1190	485	DGJMBLJC_01396	HFDHOMNF_03539	ALEPGING_00734	GEOGNNEI_01399	BINKDPLB_00160	IPPPMGOG_00997	NCHKEDON_01297	PLMPIJHD_01193	LIBHOFBA_01003	MFAGDJPO_03171	AICMNGMC_01194	JAGDPAPJ_01337	JICHJFDH_00203	AHEHGMLM_02463	PABJNMJP_00291	MAPHOHON_02162	ONDKMJBG_00694	JDGDJJKN_01489	KLMHLHPE_01207	EGICBAEE_00863	LNEFCFII_01377	NILJAHBC_02022	KCIFOFJF_01849	CJCKLIFP_02165	IABBECJM_01380	LANDOHOG_01441	LOGCBOHO_01441	DKGFALGN_01466	PNFFMGCL_01523	BJCGHIIB_01001	NHHDDJBG_00160	LBLHELLM_00161	CGJPMKCI_01163	JOHJONHN_00917	CNEDDIJH_00715	JLJGJGIB_00665
ypjD		Inner membrane protein YpjD	102	102	1	1	16725				464	866	787	DGJMBLJC_01421	HFDHOMNF_03332	ALEPGING_04013	GEOGNNEI_02319	BINKDPLB_03044	IPPPMGOG_01183	NCHKEDON_02675	PLMPIJHD_02910	LIBHOFBA_02722	MFAGDJPO_02691	AICMNGMC_02975	JAGDPAPJ_02910	JICHJFDH_00017	AHEHGMLM_04089	PABJNMJP_02675	MAPHOHON_02347	ONDKMJBG_04641	JDGDJJKN_01673	KLMHLHPE_01392	EGICBAEE_01050	LNEFCFII_01192	NILJAHBC_01837	KCIFOFJF_04403	CJCKLIFP_04444	IABBECJM_01195	LANDOHOG_01626	LOGCBOHO_01626	DKGFALGN_04189	PNFFMGCL_04055	BJCGHIIB_01188	NHHDDJBG_04153	LBLHELLM_03927	CGJPMKCI_03998	JOHJONHN_04325	CNEDDIJH_04213	JLJGJGIB_03863
group_2393		hypothetical protein	102	102	1	1	2229				632	977	968	DGJMBLJC_01458	HFDHOMNF_03380	ALEPGING_03958	GEOGNNEI_01253	BINKDPLB_00014	IPPPMGOG_01142	NCHKEDON_02734	PLMPIJHD_01047	LIBHOFBA_00857	MFAGDJPO_03025	AICMNGMC_01048	JAGDPAPJ_01191	JICHJFDH_00058	AHEHGMLM_02708	PABJNMJP_00437	MAPHOHON_02306	ONDKMJBG_00548	JDGDJJKN_01634	KLMHLHPE_01351	EGICBAEE_01009	LNEFCFII_01233	NILJAHBC_01878	KCIFOFJF_01995	CJCKLIFP_02019	IABBECJM_01236	LANDOHOG_01585	LOGCBOHO_01585	DKGFALGN_01612	PNFFMGCL_01669	BJCGHIIB_01147	NHHDDJBG_00014	LBLHELLM_00015	CGJPMKCI_01307	JOHJONHN_01063	CNEDDIJH_00569	JLJGJGIB_00519
ygaV		putative HTH-type transcriptional regulator YgaV	102	102	1	1	2207				299	299	299	DGJMBLJC_01473	HFDHOMNF_03395	ALEPGING_03516	GEOGNNEI_01265	BINKDPLB_00026	IPPPMGOG_01130	NCHKEDON_02722	PLMPIJHD_01059	LIBHOFBA_00869	MFAGDJPO_03037	AICMNGMC_01060	JAGDPAPJ_01203	JICHJFDH_00071	AHEHGMLM_02696	PABJNMJP_00425	MAPHOHON_02294	ONDKMJBG_00560	JDGDJJKN_01623	KLMHLHPE_01339	EGICBAEE_00997	LNEFCFII_01245	NILJAHBC_01890	KCIFOFJF_01983	CJCKLIFP_02031	IABBECJM_01248	LANDOHOG_01573	LOGCBOHO_01573	DKGFALGN_01600	PNFFMGCL_01657	BJCGHIIB_01135	NHHDDJBG_00026	LBLHELLM_00027	CGJPMKCI_01295	JOHJONHN_01051	CNEDDIJH_00581	JLJGJGIB_00531
nrdH		Glutaredoxin-like protein NrdH	102	102	1	1	2193				245	245	245	DGJMBLJC_01483	HFDHOMNF_03404	ALEPGING_02284	GEOGNNEI_01274	BINKDPLB_00035	IPPPMGOG_01121	NCHKEDON_02713	PLMPIJHD_01068	LIBHOFBA_00878	MFAGDJPO_03046	AICMNGMC_01069	JAGDPAPJ_01212	JICHJFDH_00080	AHEHGMLM_02687	PABJNMJP_00416	MAPHOHON_02285	ONDKMJBG_00569	JDGDJJKN_01614	KLMHLHPE_01330	EGICBAEE_00988	LNEFCFII_01254	NILJAHBC_01899	KCIFOFJF_01974	CJCKLIFP_02040	IABBECJM_01257	LANDOHOG_01564	LOGCBOHO_01564	DKGFALGN_01591	PNFFMGCL_01648	BJCGHIIB_01126	NHHDDJBG_00035	LBLHELLM_00036	CGJPMKCI_01286	JOHJONHN_01042	CNEDDIJH_00590	JLJGJGIB_00540
argG		Argininosuccinate synthase	102	102	1	1	13425				1163	1349	1341	DGJMBLJC_01568	HFDHOMNF_01208	ALEPGING_01348	GEOGNNEI_01845	BINKDPLB_01240	IPPPMGOG_03576	NCHKEDON_01416	PLMPIJHD_01770	LIBHOFBA_01579	MFAGDJPO_01751	AICMNGMC_01629	JAGDPAPJ_01772	JICHJFDH_03898	AHEHGMLM_04224	PABJNMJP_02365	MAPHOHON_03293	ONDKMJBG_03479	JDGDJJKN_01092	KLMHLHPE_04108	EGICBAEE_03823	LNEFCFII_03896	NILJAHBC_03914	KCIFOFJF_03829	CJCKLIFP_03616	IABBECJM_03659	LANDOHOG_03913	LOGCBOHO_03514	DKGFALGN_03540	PNFFMGCL_03255	BJCGHIIB_03504	NHHDDJBG_03496	LBLHELLM_03448	CGJPMKCI_03490	JOHJONHN_03750	CNEDDIJH_03272	JLJGJGIB_03441
fadB		Fatty acid oxidation complex subunit alpha	102	102	1	1	15330				524	2189	2165	DGJMBLJC_01710	HFDHOMNF_01957	ALEPGING_04204	GEOGNNEI_02116	BINKDPLB_02969	IPPPMGOG_01253	NCHKEDON_04431	PLMPIJHD_02158	LIBHOFBA_01966	MFAGDJPO_02025	AICMNGMC_01999	JAGDPAPJ_02158	JICHJFDH_03793	AHEHGMLM_02376	PABJNMJP_00696	MAPHOHON_03991	ONDKMJBG_02047	JDGDJJKN_04214	KLMHLHPE_04202	EGICBAEE_04097	LNEFCFII_04132	NILJAHBC_04149	KCIFOFJF_04063	CJCKLIFP_04155	IABBECJM_04275	LANDOHOG_04222	LOGCBOHO_04273	DKGFALGN_03813	PNFFMGCL_03800	BJCGHIIB_03612	NHHDDJBG_03664	LBLHELLM_03542	CGJPMKCI_03582	JOHJONHN_03880	CNEDDIJH_03506	JLJGJGIB_03534
group_2434		hypothetical protein	102	102	1	1	14556				701	1067	1016	DGJMBLJC_01808	HFDHOMNF_03629	ALEPGING_03828	GEOGNNEI_03846	BINKDPLB_03583	IPPPMGOG_02240	NCHKEDON_01681	PLMPIJHD_01643	LIBHOFBA_01452	MFAGDJPO_01624	AICMNGMC_01502	JAGDPAPJ_01645	JICHJFDH_03419	AHEHGMLM_01978	PABJNMJP_02630	MAPHOHON_02904	ONDKMJBG_03508	JDGDJJKN_04453	KLMHLHPE_02709	EGICBAEE_03673	LNEFCFII_03670	NILJAHBC_03368	KCIFOFJF_03604	CJCKLIFP_03187	IABBECJM_03230	LANDOHOG_03228	LOGCBOHO_02914	DKGFALGN_03413	PNFFMGCL_02783	BJCGHIIB_02587	NHHDDJBG_02397	LBLHELLM_02367	CGJPMKCI_02385	JOHJONHN_03200	CNEDDIJH_03065	JLJGJGIB_01704
group_2436		hypothetical protein	102	102	1	1	14550				821	2096	2063	DGJMBLJC_01813	HFDHOMNF_03624	ALEPGING_03823	GEOGNNEI_03851	BINKDPLB_03588	IPPPMGOG_02245	NCHKEDON_01686	PLMPIJHD_01648	LIBHOFBA_01457	MFAGDJPO_01629	AICMNGMC_01507	JAGDPAPJ_01650	JICHJFDH_03414	AHEHGMLM_01983	PABJNMJP_02635	MAPHOHON_02909	ONDKMJBG_03513	JDGDJJKN_04448	KLMHLHPE_02704	EGICBAEE_03668	LNEFCFII_03665	NILJAHBC_03363	KCIFOFJF_03599	CJCKLIFP_03192	IABBECJM_03235	LANDOHOG_03233	LOGCBOHO_02919	DKGFALGN_03418	PNFFMGCL_02778	BJCGHIIB_02582	NHHDDJBG_02392	LBLHELLM_02372	CGJPMKCI_02380	JOHJONHN_03195	CNEDDIJH_03060	JLJGJGIB_01709
argD		Acetylornithine/succinyldiaminopimelate aminotransferase	102	102	1	1	14549				263	1217	1207	DGJMBLJC_01814	HFDHOMNF_03623	ALEPGING_03822	GEOGNNEI_03852	BINKDPLB_03589	IPPPMGOG_02246	NCHKEDON_01687	PLMPIJHD_01649	LIBHOFBA_01458	MFAGDJPO_01630	AICMNGMC_01508	JAGDPAPJ_01651	JICHJFDH_03413	AHEHGMLM_01984	PABJNMJP_02636	MAPHOHON_02910	ONDKMJBG_03514	JDGDJJKN_04447	KLMHLHPE_02703	EGICBAEE_03667	LNEFCFII_03664	NILJAHBC_03362	KCIFOFJF_03598	CJCKLIFP_03193	IABBECJM_03236	LANDOHOG_03234	LOGCBOHO_02920	DKGFALGN_03419	PNFFMGCL_02777	BJCGHIIB_02581	NHHDDJBG_02391	LBLHELLM_02373	CGJPMKCI_02379	JOHJONHN_03194	CNEDDIJH_03059	JLJGJGIB_01710
malP_1		Maltodextrin phosphorylase	102	102	1	1	14477				1175	2567	2382	DGJMBLJC_01864	HFDHOMNF_03571	ALEPGING_01734	GEOGNNEI_03897	BINKDPLB_03634	IPPPMGOG_04585	NCHKEDON_03316	PLMPIJHD_01694	LIBHOFBA_01503	MFAGDJPO_01675	AICMNGMC_01553	JAGDPAPJ_01696	JICHJFDH_03367	AHEHGMLM_03465	PABJNMJP_04660	MAPHOHON_02955	ONDKMJBG_03559	JDGDJJKN_03463	KLMHLHPE_02658	EGICBAEE_03622	LNEFCFII_03619	NILJAHBC_03317	KCIFOFJF_03553	CJCKLIFP_03238	IABBECJM_03281	LANDOHOG_03279	LOGCBOHO_02965	DKGFALGN_03464	PNFFMGCL_02732	BJCGHIIB_02536	NHHDDJBG_02346	LBLHELLM_02418	CGJPMKCI_02334	JOHJONHN_03149	CNEDDIJH_03014	JLJGJGIB_01755
prlC		Oligopeptidase A	102	102	1	1	14334				1268	2042	2029	DGJMBLJC_01951	HFDHOMNF_01896	ALEPGING_03496	GEOGNNEI_03969	BINKDPLB_03706	IPPPMGOG_04513	NCHKEDON_03386	PLMPIJHD_02967	LIBHOFBA_02779	MFAGDJPO_02748	AICMNGMC_03032	JAGDPAPJ_02967	JICHJFDH_03295	AHEHGMLM_02753	PABJNMJP_02462	MAPHOHON_03028	ONDKMJBG_02082	JDGDJJKN_03385	KLMHLHPE_02586	EGICBAEE_04385	LNEFCFII_04423	NILJAHBC_03244	KCIFOFJF_04346	CJCKLIFP_03311	IABBECJM_03354	LANDOHOG_03352	LOGCBOHO_03038	DKGFALGN_04237	PNFFMGCL_02660	BJCGHIIB_02464	NHHDDJBG_02274	LBLHELLM_02490	CGJPMKCI_02262	JOHJONHN_04278	CNEDDIJH_04187	JLJGJGIB_01827
ligA		DNA ligase	102	102	1	1	10369				656	2015	1997	DGJMBLJC_02198	HFDHOMNF_03079	ALEPGING_02143	GEOGNNEI_02696	BINKDPLB_01824	IPPPMGOG_00918	NCHKEDON_00864	PLMPIJHD_02664	LIBHOFBA_02476	MFAGDJPO_01284	AICMNGMC_02784	JAGDPAPJ_02719	JICHJFDH_02378	AHEHGMLM_02847	PABJNMJP_03966	MAPHOHON_02448	ONDKMJBG_03097	JDGDJJKN_02986	KLMHLHPE_02188	EGICBAEE_01315	LNEFCFII_01918	NILJAHBC_02462	KCIFOFJF_02352	CJCKLIFP_01425	IABBECJM_01819	LANDOHOG_01891	LOGCBOHO_02224	DKGFALGN_02382	PNFFMGCL_01856	BJCGHIIB_01858	NHHDDJBG_01664	LBLHELLM_01067	CGJPMKCI_02013	JOHJONHN_02221	CNEDDIJH_01457	JLJGJGIB_01481
ybhA_2		Pyridoxal phosphate phosphatase YbhA	102	102	1	1	5143				131	860	811	DGJMBLJC_02440	HFDHOMNF_02230	ALEPGING_02902	GEOGNNEI_02263	BINKDPLB_02438	IPPPMGOG_00599	NCHKEDON_02006	PLMPIJHD_02854	LIBHOFBA_02666	MFAGDJPO_02284	AICMNGMC_01778	JAGDPAPJ_02425	JICHJFDH_01786	AHEHGMLM_04390	PABJNMJP_03112	MAPHOHON_04419	ONDKMJBG_02365	JDGDJJKN_00683	KLMHLHPE_04308	EGICBAEE_04317	LNEFCFII_04376	NILJAHBC_04383	KCIFOFJF_04320	CJCKLIFP_04389	IABBECJM_04432	LANDOHOG_04379	LOGCBOHO_04455	DKGFALGN_04580	PNFFMGCL_03971	BJCGHIIB_04144	NHHDDJBG_03931	LBLHELLM_03780	CGJPMKCI_03965	JOHJONHN_04252	CNEDDIJH_04119	JLJGJGIB_03829
yhdJ		DNA adenine methyltransferase YhdJ	102	102	1	1	13541				572	893	879	DGJMBLJC_02579	HFDHOMNF_02734	ALEPGING_03044	GEOGNNEI_02405	BINKDPLB_02837	IPPPMGOG_01239	NCHKEDON_03661	PLMPIJHD_03033	LIBHOFBA_02845	MFAGDJPO_02814	AICMNGMC_01727	JAGDPAPJ_03088	JICHJFDH_02097	AHEHGMLM_04016	PABJNMJP_02922	MAPHOHON_04542	ONDKMJBG_03852	JDGDJJKN_00971	KLMHLHPE_04384	EGICBAEE_04451	LNEFCFII_04489	NILJAHBC_04480	KCIFOFJF_04480	CJCKLIFP_04478	IABBECJM_04504	LANDOHOG_04476	LOGCBOHO_04479	DKGFALGN_04303	PNFFMGCL_04177	BJCGHIIB_04215	NHHDDJBG_04176	LBLHELLM_04152	CGJPMKCI_04082	JOHJONHN_04437	CNEDDIJH_04423	JLJGJGIB_04014
yhdT		putative membrane protein YhdT	102	102	1	1	13533				242	242	242	DGJMBLJC_02584	HFDHOMNF_02729	ALEPGING_03039	GEOGNNEI_02410	BINKDPLB_02842	IPPPMGOG_01234	NCHKEDON_03656	PLMPIJHD_03038	LIBHOFBA_02850	MFAGDJPO_02819	AICMNGMC_01732	JAGDPAPJ_03093	JICHJFDH_02102	AHEHGMLM_04021	PABJNMJP_02927	MAPHOHON_04537	ONDKMJBG_03847	JDGDJJKN_00999	KLMHLHPE_04389	EGICBAEE_04456	LNEFCFII_04494	NILJAHBC_04485	KCIFOFJF_04485	CJCKLIFP_04483	IABBECJM_04499	LANDOHOG_04481	LOGCBOHO_04484	DKGFALGN_04308	PNFFMGCL_04182	BJCGHIIB_04220	NHHDDJBG_04181	LBLHELLM_04147	CGJPMKCI_04087	JOHJONHN_04432	CNEDDIJH_04418	JLJGJGIB_04009
bhsA_2		hypothetical protein	102	102	1	1	13507				263	263	263	DGJMBLJC_02606	HFDHOMNF_02709	ALEPGING_03399	GEOGNNEI_02430	BINKDPLB_02862	IPPPMGOG_01214	NCHKEDON_03636	PLMPIJHD_03058	LIBHOFBA_02870	MFAGDJPO_02839	AICMNGMC_01752	JAGDPAPJ_03113	JICHJFDH_02122	AHEHGMLM_04041	PABJNMJP_02947	MAPHOHON_04517	ONDKMJBG_03827	JDGDJJKN_01019	KLMHLHPE_04409	EGICBAEE_04476	LNEFCFII_04514	NILJAHBC_04505	KCIFOFJF_04505	CJCKLIFP_04503	IABBECJM_04479	LANDOHOG_04501	LOGCBOHO_04504	DKGFALGN_04328	PNFFMGCL_04202	BJCGHIIB_04240	NHHDDJBG_04201	LBLHELLM_04127	CGJPMKCI_04107	JOHJONHN_04412	CNEDDIJH_04398	JLJGJGIB_03989
ycaO		Ribosomal protein S12 methylthiotransferase accessory factor YcaO	102	102	1	1	5448				1460	1835	1827	DGJMBLJC_02825	HFDHOMNF_01298	ALEPGING_03072	GEOGNNEI_04469	BINKDPLB_03004	IPPPMGOG_00824	NCHKEDON_03060	PLMPIJHD_04580	LIBHOFBA_04663	MFAGDJPO_04599	AICMNGMC_04388	JAGDPAPJ_04573	JICHJFDH_00888	AHEHGMLM_02273	PABJNMJP_01857	MAPHOHON_03403	ONDKMJBG_04216	JDGDJJKN_00545	KLMHLHPE_03295	EGICBAEE_03448	LNEFCFII_03305	NILJAHBC_03683	KCIFOFJF_03468	CJCKLIFP_03792	IABBECJM_03835	LANDOHOG_03592	LOGCBOHO_03690	DKGFALGN_03374	PNFFMGCL_04220	BJCGHIIB_03739	NHHDDJBG_04233	LBLHELLM_04095	CGJPMKCI_03685	JOHJONHN_04466	CNEDDIJH_04452	JLJGJGIB_02662
pqiB		Paraquat-inducible protein B	102	102	1	1	5669				335	1640	1621	DGJMBLJC_02930	HFDHOMNF_00021	ALEPGING_03974	GEOGNNEI_01158	BINKDPLB_04139	IPPPMGOG_04242	NCHKEDON_02798	PLMPIJHD_01016	LIBHOFBA_00828	MFAGDJPO_01018	AICMNGMC_01019	JAGDPAPJ_01162	JICHJFDH_02833	AHEHGMLM_01711	PABJNMJP_01678	MAPHOHON_01162	ONDKMJBG_00805	JDGDJJKN_00508	KLMHLHPE_00901	EGICBAEE_03032	LNEFCFII_00015	NILJAHBC_00015	KCIFOFJF_01163	CJCKLIFP_00015	IABBECJM_01163	LANDOHOG_01162	LOGCBOHO_01162	DKGFALGN_00015	PNFFMGCL_01218	BJCGHIIB_00695	NHHDDJBG_03125	LBLHELLM_00467	CGJPMKCI_00015	JOHJONHN_01091	CNEDDIJH_02666	JLJGJGIB_02818
group_2584		hypothetical protein	102	102	1	1	5769				359	362	361	DGJMBLJC_02980	HFDHOMNF_00070	ALEPGING_02538	GEOGNNEI_01113	BINKDPLB_04185	IPPPMGOG_04288	NCHKEDON_02844	PLMPIJHD_00970	LIBHOFBA_00782	MFAGDJPO_00972	AICMNGMC_00973	JAGDPAPJ_01116	JICHJFDH_00926	AHEHGMLM_01665	PABJNMJP_01632	MAPHOHON_01116	ONDKMJBG_00851	JDGDJJKN_00459	KLMHLHPE_00855	EGICBAEE_02986	LNEFCFII_00061	NILJAHBC_00061	KCIFOFJF_01117	CJCKLIFP_00061	IABBECJM_01117	LANDOHOG_01116	LOGCBOHO_01116	DKGFALGN_00061	PNFFMGCL_01173	BJCGHIIB_00650	NHHDDJBG_03079	LBLHELLM_00512	CGJPMKCI_00060	JOHJONHN_01137	CNEDDIJH_02620	JLJGJGIB_02772
tyrP		Tyrosine-specific transport protein	102	102	1	1	9012				851	1277	1264	DGJMBLJC_03065	HFDHOMNF_00954	ALEPGING_00822	GEOGNNEI_00286	BINKDPLB_03276	IPPPMGOG_02477	NCHKEDON_04019	PLMPIJHD_00144	LIBHOFBA_03469	MFAGDJPO_00144	AICMNGMC_00144	JAGDPAPJ_00287	JICHJFDH_02286	AHEHGMLM_00844	PABJNMJP_00803	MAPHOHON_00287	ONDKMJBG_01679	JDGDJJKN_01857	KLMHLHPE_01856	EGICBAEE_02183	LNEFCFII_00888	NILJAHBC_00890	KCIFOFJF_00287	CJCKLIFP_00890	IABBECJM_00287	LANDOHOG_00286	LOGCBOHO_00286	DKGFALGN_00888	PNFFMGCL_00286	BJCGHIIB_01367	NHHDDJBG_03689	LBLHELLM_03867	CGJPMKCI_01357	JOHJONHN_00062	CNEDDIJH_01190	JLJGJGIB_00444
yebF		Protein YebF	102	102	1	1	8905				206	356	350	DGJMBLJC_03130	HFDHOMNF_00896	ALEPGING_04258	GEOGNNEI_00341	BINKDPLB_03221	IPPPMGOG_02422	NCHKEDON_03964	PLMPIJHD_00199	LIBHOFBA_00008	MFAGDJPO_00199	AICMNGMC_00199	JAGDPAPJ_00342	JICHJFDH_00333	AHEHGMLM_00789	PABJNMJP_00858	MAPHOHON_00342	ONDKMJBG_01624	JDGDJJKN_01912	KLMHLHPE_00083	EGICBAEE_02238	LNEFCFII_00833	NILJAHBC_00835	KCIFOFJF_00342	CJCKLIFP_00835	IABBECJM_00342	LANDOHOG_00341	LOGCBOHO_00341	DKGFALGN_00833	PNFFMGCL_00341	BJCGHIIB_01312	NHHDDJBG_02018	LBLHELLM_01977	CGJPMKCI_00844	JOHJONHN_00117	CNEDDIJH_01136	JLJGJGIB_00389
group_2603		hypothetical protein	102	102	1	1	7572				1112	1595	1552	DGJMBLJC_03181	HFDHOMNF_00845	ALEPGING_00196	GEOGNNEI_00393	BINKDPLB_03170	IPPPMGOG_02371	NCHKEDON_03913	PLMPIJHD_00251	LIBHOFBA_00060	MFAGDJPO_00251	AICMNGMC_00251	JAGDPAPJ_00394	JICHJFDH_00385	AHEHGMLM_00737	PABJNMJP_00910	MAPHOHON_00394	ONDKMJBG_01573	JDGDJJKN_01962	KLMHLHPE_00135	EGICBAEE_02290	LNEFCFII_00782	NILJAHBC_00784	KCIFOFJF_00394	CJCKLIFP_00784	IABBECJM_00394	LANDOHOG_00393	LOGCBOHO_00393	DKGFALGN_00782	PNFFMGCL_00393	BJCGHIIB_01261	NHHDDJBG_01967	LBLHELLM_02029	CGJPMKCI_00793	JOHJONHN_00169	CNEDDIJH_01085	JLJGJGIB_00338
ycgM		putative protein YcgM	102	102	1	1	7555				629	701	659	DGJMBLJC_03198	HFDHOMNF_00829	ALEPGING_00212	GEOGNNEI_00409	BINKDPLB_03154	IPPPMGOG_02355	NCHKEDON_03897	PLMPIJHD_00267	LIBHOFBA_00076	MFAGDJPO_00267	AICMNGMC_00267	JAGDPAPJ_00410	JICHJFDH_00401	AHEHGMLM_00721	PABJNMJP_00926	MAPHOHON_00410	ONDKMJBG_01557	JDGDJJKN_01978	KLMHLHPE_00151	EGICBAEE_00012	LNEFCFII_00766	NILJAHBC_00768	KCIFOFJF_00410	CJCKLIFP_00768	IABBECJM_00410	LANDOHOG_00409	LOGCBOHO_00409	DKGFALGN_00766	PNFFMGCL_00409	BJCGHIIB_01245	NHHDDJBG_01951	LBLHELLM_02045	CGJPMKCI_00777	JOHJONHN_00185	CNEDDIJH_01069	JLJGJGIB_00322
fldB		Flavodoxin 2	102	102	1	1	1745				476	650	521	DGJMBLJC_03387	HFDHOMNF_03824	ALEPGING_03459	GEOGNNEI_01528	BINKDPLB_00289	IPPPMGOG_03997	NCHKEDON_01804	PLMPIJHD_01322	LIBHOFBA_01132	MFAGDJPO_03300	AICMNGMC_01323	JAGDPAPJ_01466	JICHJFDH_01880	AHEHGMLM_03902	PABJNMJP_00163	MAPHOHON_02034	ONDKMJBG_02685	JDGDJJKN_01367	KLMHLHPE_01078	EGICBAEE_00735	LNEFCFII_01507	NILJAHBC_02151	KCIFOFJF_01720	CJCKLIFP_02294	IABBECJM_01508	LANDOHOG_01313	LOGCBOHO_01313	DKGFALGN_01337	PNFFMGCL_01395	BJCGHIIB_00872	NHHDDJBG_00289	LBLHELLM_00290	CGJPMKCI_01034	JOHJONHN_00788	CNEDDIJH_00844	JLJGJGIB_00794
ygfX		Inner membrane protein YgfX	102	102	1	1	1744				272	413	411	DGJMBLJC_03388	HFDHOMNF_03823	ALEPGING_03458	GEOGNNEI_01529	BINKDPLB_00290	IPPPMGOG_03998	NCHKEDON_01805	PLMPIJHD_01323	LIBHOFBA_01133	MFAGDJPO_03301	AICMNGMC_01324	JAGDPAPJ_01467	JICHJFDH_01879	AHEHGMLM_03901	PABJNMJP_00162	MAPHOHON_02033	ONDKMJBG_02686	JDGDJJKN_01366	KLMHLHPE_01077	EGICBAEE_00734	LNEFCFII_01508	NILJAHBC_02152	KCIFOFJF_01719	CJCKLIFP_02295	IABBECJM_01509	LANDOHOG_01312	LOGCBOHO_01312	DKGFALGN_01336	PNFFMGCL_01394	BJCGHIIB_00871	NHHDDJBG_00290	LBLHELLM_00291	CGJPMKCI_01033	JOHJONHN_00787	CNEDDIJH_00845	JLJGJGIB_00795
mdaB		Modulator of drug activity B	102	102	1	1	13108				356	581	573	DGJMBLJC_03545	HFDHOMNF_03664	ALEPGING_00244	GEOGNNEI_01675	BINKDPLB_02348	IPPPMGOG_04144	NCHKEDON_01951	PLMPIJHD_01469	LIBHOFBA_01279	MFAGDJPO_03447	AICMNGMC_01470	JAGDPAPJ_01613	JICHJFDH_02990	AHEHGMLM_04277	PABJNMJP_00016	MAPHOHON_01887	ONDKMJBG_02831	JDGDJJKN_01234	KLMHLHPE_00931	EGICBAEE_00588	LNEFCFII_01654	NILJAHBC_04559	KCIFOFJF_04555	CJCKLIFP_04553	IABBECJM_04556	LANDOHOG_04551	LOGCBOHO_04554	DKGFALGN_01190	PNFFMGCL_01248	BJCGHIIB_00725	NHHDDJBG_00436	LBLHELLM_00437	CGJPMKCI_00887	JOHJONHN_00641	CNEDDIJH_00991	JLJGJGIB_04088
hldE		Bifunctional protein HldE	102	102	1	1	13146				884	1433	1427	DGJMBLJC_03568	HFDHOMNF_01116	ALEPGING_02811	GEOGNNEI_01927	BINKDPLB_01322	IPPPMGOG_03494	NCHKEDON_01500	PLMPIJHD_01853	LIBHOFBA_01663	MFAGDJPO_01835	AICMNGMC_01713	JAGDPAPJ_01855	JICHJFDH_01207	AHEHGMLM_03732	PABJNMJP_02447	MAPHOHON_03375	ONDKMJBG_03397	JDGDJJKN_01213	KLMHLHPE_04026	EGICBAEE_03906	LNEFCFII_03813	NILJAHBC_03832	KCIFOFJF_03747	CJCKLIFP_03534	IABBECJM_03577	LANDOHOG_03831	LOGCBOHO_03432	DKGFALGN_03622	PNFFMGCL_03376	BJCGHIIB_03384	NHHDDJBG_03578	LBLHELLM_03366	CGJPMKCI_03572	JOHJONHN_03668	CNEDDIJH_03190	JLJGJGIB_03359
nfo		Endonuclease 4	102	102	1	1	9751				356	857	850	DGJMBLJC_03699	HFDHOMNF_01532	ALEPGING_03528	GEOGNNEI_00032	BINKDPLB_00773	IPPPMGOG_01515	NCHKEDON_02282	PLMPIJHD_04702	LIBHOFBA_03723	MFAGDJPO_04455	AICMNGMC_04511	JAGDPAPJ_00033	JICHJFDH_01737	AHEHGMLM_01098	PABJNMJP_03446	MAPHOHON_00033	ONDKMJBG_01933	JDGDJJKN_04093	KLMHLHPE_02110	EGICBAEE_01928	LNEFCFII_01142	NILJAHBC_01144	KCIFOFJF_00033	CJCKLIFP_01144	IABBECJM_00033	LANDOHOG_00032	LOGCBOHO_00032	DKGFALGN_01142	PNFFMGCL_00032	BJCGHIIB_01621	NHHDDJBG_00795	LBLHELLM_03985	CGJPMKCI_01611	JOHJONHN_01434	CNEDDIJH_02779	JLJGJGIB_00928
nadE		NH(3)-dependent NAD(+) synthetase	102	102	1	1	6152				386	827	821	DGJMBLJC_03810	HFDHOMNF_00282	ALEPGING_01214	GEOGNNEI_00916	BINKDPLB_02211	IPPPMGOG_01927	NCHKEDON_00223	PLMPIJHD_00773	LIBHOFBA_00585	MFAGDJPO_00775	AICMNGMC_00776	JAGDPAPJ_00919	JICHJFDH_04237	AHEHGMLM_02922	PABJNMJP_01434	MAPHOHON_00918	ONDKMJBG_01049	JDGDJJKN_00264	KLMHLHPE_00658	EGICBAEE_00520	LNEFCFII_00258	NILJAHBC_00259	KCIFOFJF_00919	CJCKLIFP_00259	IABBECJM_00919	LANDOHOG_00918	LOGCBOHO_00918	DKGFALGN_00258	PNFFMGCL_00976	BJCGHIIB_00453	NHHDDJBG_00636	LBLHELLM_00709	CGJPMKCI_00257	JOHJONHN_01334	CNEDDIJH_00110	JLJGJGIB_03083
spy		Periplasmic chaperone Spy	102	102	1	1	6149				377	485	483	DGJMBLJC_03813	HFDHOMNF_00280	ALEPGING_01212	GEOGNNEI_00918	BINKDPLB_02209	IPPPMGOG_01929	NCHKEDON_00221	PLMPIJHD_00775	LIBHOFBA_00587	MFAGDJPO_00777	AICMNGMC_00778	JAGDPAPJ_00921	JICHJFDH_04235	AHEHGMLM_02920	PABJNMJP_01436	MAPHOHON_00920	ONDKMJBG_01047	JDGDJJKN_00266	KLMHLHPE_00660	EGICBAEE_00522	LNEFCFII_00256	NILJAHBC_00257	KCIFOFJF_00921	CJCKLIFP_00257	IABBECJM_00921	LANDOHOG_00920	LOGCBOHO_00920	DKGFALGN_00256	PNFFMGCL_00978	BJCGHIIB_00455	NHHDDJBG_00638	LBLHELLM_00707	CGJPMKCI_00255	JOHJONHN_01332	CNEDDIJH_00108	JLJGJGIB_03081
tmk		Thymidylate kinase	102	102	1	1	5938				356	641	637	DGJMBLJC_03934	HFDHOMNF_00165	ALEPGING_02226	GEOGNNEI_01028	BINKDPLB_04270	IPPPMGOG_02039	NCHKEDON_00111	PLMPIJHD_00885	LIBHOFBA_00697	MFAGDJPO_00887	AICMNGMC_00888	JAGDPAPJ_01031	JICHJFDH_01277	AHEHGMLM_01579	PABJNMJP_01546	MAPHOHON_01030	ONDKMJBG_00937	JDGDJJKN_00372	KLMHLHPE_00770	EGICBAEE_02901	LNEFCFII_00146	NILJAHBC_00146	KCIFOFJF_01032	CJCKLIFP_00146	IABBECJM_01032	LANDOHOG_01031	LOGCBOHO_01031	DKGFALGN_00146	PNFFMGCL_01088	BJCGHIIB_00565	NHHDDJBG_00748	LBLHELLM_00597	CGJPMKCI_00145	JOHJONHN_01222	CNEDDIJH_02535	JLJGJGIB_02687
pyrC		Dihydroorotase	102	102	1	1	5879				1046	1058	1046	DGJMBLJC_03976	HFDHOMNF_00126	ALEPGING_02191	GEOGNNEI_01063	BINKDPLB_04235	IPPPMGOG_02074	NCHKEDON_00076	PLMPIJHD_00920	LIBHOFBA_00732	MFAGDJPO_00922	AICMNGMC_00923	JAGDPAPJ_01066	JICHJFDH_01242	AHEHGMLM_01614	PABJNMJP_01581	MAPHOHON_01065	ONDKMJBG_00902	JDGDJJKN_00409	KLMHLHPE_00805	EGICBAEE_02936	LNEFCFII_00111	NILJAHBC_00111	KCIFOFJF_01067	CJCKLIFP_00111	IABBECJM_01067	LANDOHOG_01066	LOGCBOHO_01066	DKGFALGN_00111	PNFFMGCL_01123	BJCGHIIB_00600	NHHDDJBG_03029	LBLHELLM_00562	CGJPMKCI_00110	JOHJONHN_01187	CNEDDIJH_02570	JLJGJGIB_02722
oppB		Oligopeptide transport system permease protein OppB	102	102	1	1	7426				512	1043	922	DGJMBLJC_04022	HFDHOMNF_00758	ALEPGING_03708	GEOGNNEI_00476	BINKDPLB_01037	IPPPMGOG_02288	NCHKEDON_03830	PLMPIJHD_00334	LIBHOFBA_00143	MFAGDJPO_00334	AICMNGMC_00334	JAGDPAPJ_00477	JICHJFDH_00467	AHEHGMLM_00654	PABJNMJP_00993	MAPHOHON_00477	ONDKMJBG_01490	JDGDJJKN_02044	KLMHLHPE_00218	EGICBAEE_00079	LNEFCFII_00699	NILJAHBC_00700	KCIFOFJF_00478	CJCKLIFP_00700	IABBECJM_00478	LANDOHOG_00477	LOGCBOHO_00477	DKGFALGN_00699	PNFFMGCL_00476	BJCGHIIB_03864	NHHDDJBG_01884	LBLHELLM_02112	CGJPMKCI_00710	JOHJONHN_00252	CNEDDIJH_00551	JLJGJGIB_00255
pspF		Psp operon transcriptional activator	102	102	1	1	7327				980	1031	980	DGJMBLJC_04083	HFDHOMNF_00698	ALEPGING_03229	GEOGNNEI_00531	BINKDPLB_00982	IPPPMGOG_01542	NCHKEDON_00608	PLMPIJHD_00390	LIBHOFBA_00199	MFAGDJPO_00390	AICMNGMC_00390	JAGDPAPJ_00533	JICHJFDH_00522	AHEHGMLM_00598	PABJNMJP_01049	MAPHOHON_00533	ONDKMJBG_01434	JDGDJJKN_02100	KLMHLHPE_00273	EGICBAEE_00135	LNEFCFII_00643	NILJAHBC_00644	KCIFOFJF_00534	CJCKLIFP_00644	IABBECJM_00534	LANDOHOG_00533	LOGCBOHO_00533	DKGFALGN_00643	PNFFMGCL_00531	BJCGHIIB_00009	NHHDDJBG_01646	LBLHELLM_01751	CGJPMKCI_00655	JOHJONHN_00308	CNEDDIJH_00495	JLJGJGIB_00200
mppA		Periplasmic murein peptide-binding protein	102	102	1	1	7314				413	1901	1606	DGJMBLJC_04096	HFDHOMNF_00686	ALEPGING_03217	GEOGNNEI_00543	BINKDPLB_00970	IPPPMGOG_01554	NCHKEDON_00596	PLMPIJHD_00402	LIBHOFBA_00211	MFAGDJPO_00402	AICMNGMC_00402	JAGDPAPJ_00545	JICHJFDH_00534	AHEHGMLM_00586	PABJNMJP_01061	MAPHOHON_00545	ONDKMJBG_01422	JDGDJJKN_02112	KLMHLHPE_00285	EGICBAEE_00147	LNEFCFII_00631	NILJAHBC_00632	KCIFOFJF_00546	CJCKLIFP_00632	IABBECJM_00546	LANDOHOG_00545	LOGCBOHO_00545	DKGFALGN_00631	PNFFMGCL_00543	BJCGHIIB_00021	NHHDDJBG_01634	LBLHELLM_01763	CGJPMKCI_00643	JOHJONHN_00320	CNEDDIJH_00483	JLJGJGIB_00188
tehB		Tellurite methyltransferase	102	102	1	1	7162				239	596	592	DGJMBLJC_04186	HFDHOMNF_00613	ALEPGING_01666	GEOGNNEI_00614	BINKDPLB_02776	IPPPMGOG_01625	NCHKEDON_00525	PLMPIJHD_00473	LIBHOFBA_00282	MFAGDJPO_00473	AICMNGMC_00473	JAGDPAPJ_00616	JICHJFDH_00606	AHEHGMLM_00515	PABJNMJP_01132	MAPHOHON_00616	ONDKMJBG_01351	JDGDJJKN_02200	KLMHLHPE_00356	EGICBAEE_00218	LNEFCFII_00560	NILJAHBC_00561	KCIFOFJF_00617	CJCKLIFP_00561	IABBECJM_00617	LANDOHOG_00616	LOGCBOHO_00616	DKGFALGN_00560	PNFFMGCL_00614	BJCGHIIB_00092	NHHDDJBG_01563	LBLHELLM_01834	CGJPMKCI_00572	JOHJONHN_00391	CNEDDIJH_00412	JLJGJGIB_00117
group_2748		hypothetical protein	102	102	1	1	7161				212	668	662	DGJMBLJC_04187	HFDHOMNF_00612	ALEPGING_01667	GEOGNNEI_00615	BINKDPLB_02775	IPPPMGOG_01626	NCHKEDON_00524	PLMPIJHD_00474	LIBHOFBA_00283	MFAGDJPO_00474	AICMNGMC_00474	JAGDPAPJ_00617	JICHJFDH_00607	AHEHGMLM_00514	PABJNMJP_01133	MAPHOHON_00617	ONDKMJBG_01350	JDGDJJKN_02201	KLMHLHPE_00357	EGICBAEE_00219	LNEFCFII_00559	NILJAHBC_00560	KCIFOFJF_00618	CJCKLIFP_00560	IABBECJM_00618	LANDOHOG_00617	LOGCBOHO_00617	DKGFALGN_00559	PNFFMGCL_00615	BJCGHIIB_00093	NHHDDJBG_01562	LBLHELLM_01835	CGJPMKCI_00571	JOHJONHN_00392	CNEDDIJH_00411	JLJGJGIB_00116
sbcB		Exodeoxyribonuclease I	102	102	1	1	9457				962	1430	1425	DGJMBLJC_04396	HFDHOMNF_01090	ALEPGING_04367	GEOGNNEI_00159	BINKDPLB_02927	IPPPMGOG_02604	NCHKEDON_04146	PLMPIJHD_00017	LIBHOFBA_03596	MFAGDJPO_00017	AICMNGMC_00017	JAGDPAPJ_00160	JICHJFDH_01610	AHEHGMLM_00971	PABJNMJP_03319	MAPHOHON_00160	ONDKMJBG_01806	JDGDJJKN_01712	KLMHLHPE_01983	EGICBAEE_02056	LNEFCFII_01015	NILJAHBC_01017	KCIFOFJF_00160	CJCKLIFP_01017	IABBECJM_00160	LANDOHOG_00159	LOGCBOHO_00159	DKGFALGN_01015	PNFFMGCL_00159	BJCGHIIB_01494	NHHDDJBG_00922	LBLHELLM_03254	CGJPMKCI_01484	JOHJONHN_01561	CNEDDIJH_03799	JLJGJGIB_01055
yegS		putative lipid kinase YegS	102	102	1	1	9629				386	899	888	DGJMBLJC_04501	HFDHOMNF_01467	ALEPGING_01032	GEOGNNEI_00095	BINKDPLB_00710	IPPPMGOG_02656	NCHKEDON_02345	PLMPIJHD_04639	LIBHOFBA_03660	MFAGDJPO_04392	AICMNGMC_04448	JAGDPAPJ_00096	JICHJFDH_01674	AHEHGMLM_01035	PABJNMJP_03383	MAPHOHON_00096	ONDKMJBG_01870	JDGDJJKN_04030	KLMHLHPE_02047	EGICBAEE_01991	LNEFCFII_01079	NILJAHBC_01081	KCIFOFJF_00096	CJCKLIFP_01081	IABBECJM_00096	LANDOHOG_00095	LOGCBOHO_00095	DKGFALGN_01079	PNFFMGCL_00095	BJCGHIIB_01558	NHHDDJBG_00858	LBLHELLM_01571	CGJPMKCI_01548	JOHJONHN_01497	CNEDDIJH_02716	JLJGJGIB_00991
mepH		Murein DD-endopeptidase MepH	102	102	1	1	6740				443	827	806	DGJMBLJC_04598	HFDHOMNF_00419	ALEPGING_04153	GEOGNNEI_00796	BINKDPLB_02027	IPPPMGOG_01807	NCHKEDON_00343	PLMPIJHD_00653	LIBHOFBA_00465	MFAGDJPO_00655	AICMNGMC_00656	JAGDPAPJ_00799	JICHJFDH_04357	AHEHGMLM_03043	PABJNMJP_01314	MAPHOHON_00798	ONDKMJBG_01169	JDGDJJKN_00144	KLMHLHPE_00538	EGICBAEE_00400	LNEFCFII_00378	NILJAHBC_00379	KCIFOFJF_00799	CJCKLIFP_00379	IABBECJM_00799	LANDOHOG_00798	LOGCBOHO_00798	DKGFALGN_00378	PNFFMGCL_00796	BJCGHIIB_00273	NHHDDJBG_00516	LBLHELLM_00829	CGJPMKCI_00377	JOHJONHN_00574	CNEDDIJH_00230	JLJGJGIB_02088
dxr		1-deoxy-D-xylulose 5-phosphate reductoisomerase	102	102	1	1	10756				920	1196	1192	DGJMBLJC_04811	HFDHOMNF_02666	ALEPGING_00269	GEOGNNEI_03357	BINKDPLB_00633	IPPPMGOG_00233	NCHKEDON_01068	PLMPIJHD_03600	LIBHOFBA_03375	MFAGDJPO_02236	AICMNGMC_03621	JAGDPAPJ_03618	JICHJFDH_01372	AHEHGMLM_00025	PABJNMJP_04585	MAPHOHON_01843	ONDKMJBG_00506	JDGDJJKN_04298	KLMHLHPE_01787	EGICBAEE_01517	LNEFCFII_02120	NILJAHBC_01791	KCIFOFJF_01555	CJCKLIFP_01628	IABBECJM_02444	LANDOHOG_02443	LOGCBOHO_02021	DKGFALGN_02003	PNFFMGCL_02200	BJCGHIIB_01821	NHHDDJBG_01279	LBLHELLM_01507	CGJPMKCI_01811	JOHJONHN_01644	CNEDDIJH_01420	JLJGJGIB_01279
lpxB		Lipid-A-disaccharide synthase	102	102	1	1	10742				284	1148	1137	DGJMBLJC_04820	HFDHOMNF_02675	ALEPGING_03674	GEOGNNEI_03366	BINKDPLB_00642	IPPPMGOG_00242	NCHKEDON_01059	PLMPIJHD_03609	LIBHOFBA_03384	MFAGDJPO_02245	AICMNGMC_03630	JAGDPAPJ_03627	JICHJFDH_01363	AHEHGMLM_00016	PABJNMJP_04594	MAPHOHON_01852	ONDKMJBG_00515	JDGDJJKN_04289	KLMHLHPE_01796	EGICBAEE_01508	LNEFCFII_02111	NILJAHBC_01800	KCIFOFJF_01564	CJCKLIFP_01619	IABBECJM_02453	LANDOHOG_02452	LOGCBOHO_02030	DKGFALGN_02012	PNFFMGCL_02209	BJCGHIIB_01830	NHHDDJBG_01270	LBLHELLM_01516	CGJPMKCI_01820	JOHJONHN_01635	CNEDDIJH_01429	JLJGJGIB_01288
group_2814		hypothetical protein	102	102	1	1	437				539	632	630	DGJMBLJC_04875	HFDHOMNF_01686	ALEPGING_00549	GEOGNNEI_01800	BINKDPLB_01742	IPPPMGOG_00467	NCHKEDON_03032	PLMPIJHD_01593	LIBHOFBA_01403	MFAGDJPO_01574	AICMNGMC_04651	JAGDPAPJ_04705	JICHJFDH_02631	AHEHGMLM_03609	PABJNMJP_02002	MAPHOHON_03624	ONDKMJBG_04361	JDGDJJKN_03709	KLMHLHPE_03439	EGICBAEE_02403	LNEFCFII_03449	NILJAHBC_02818	KCIFOFJF_02116	CJCKLIFP_02634	IABBECJM_02676	LANDOHOG_02580	LOGCBOHO_03745	DKGFALGN_02235	PNFFMGCL_03135	BJCGHIIB_03346	NHHDDJBG_02900	LBLHELLM_03082	CGJPMKCI_03246	JOHJONHN_02821	CNEDDIJH_02919	JLJGJGIB_02941
ppnP		Pyrimidine/purine nucleoside phosphorylase	102	102	1	1	517				191	320	283	DGJMBLJC_04937	HFDHOMNF_04361	ALEPGING_02413	GEOGNNEI_04336	BINKDPLB_02893	IPPPMGOG_00412	NCHKEDON_03144	PLMPIJHD_04447	LIBHOFBA_04530	MFAGDJPO_04322	AICMNGMC_04255	JAGDPAPJ_04440	JICHJFDH_02610	AHEHGMLM_03160	PABJNMJP_02184	MAPHOHON_03080	ONDKMJBG_02504	JDGDJJKN_03655	KLMHLHPE_03251	EGICBAEE_02458	LNEFCFII_03261	NILJAHBC_02873	KCIFOFJF_02171	CJCKLIFP_02579	IABBECJM_02621	LANDOHOG_02635	LOGCBOHO_03278	DKGFALGN_02180	PNFFMGCL_02821	BJCGHIIB_02812	NHHDDJBG_02602	LBLHELLM_02809	CGJPMKCI_03051	JOHJONHN_02641	CNEDDIJH_02153	JLJGJGIB_02237
bioA		Adenosylmethionine-8-amino-7-oxononanoate aminotransferase	102	102	1	1	5164				698	1298	1283	DGJMBLJC_02429	HFDHOMNF_02220	ALEPGING_02478	GEOGNNEI_02272	BINKDPLB_02447	IPPPMGOG_02165	NCHKEDON_01997	PLMPIJHD_02863	LIBHOFBA_02675	MFAGDJPO_02293	AICMNGMC_01787	JAGDPAPJ_02434	JICHJFDH_01795	AHEHGMLM_04381	PABJNMJP_03103	MAPHOHON_04428	ONDKMJBG_02356	JDGDJJKN_00674	KLMHLHPE_04299	EGICBAEE_04326	LNEFCFII_04367	NILJAHBC_04392	KCIFOFJF_04311	CJCKLIFP_04398	IABBECJM_04441	LANDOHOG_04388	LOGCBOHO_04446	DKGFALGN_04366	PNFFMGCL_03962	BJCGHIIB_04135	NHHDDJBG_03940	LBLHELLM_03771	CGJPMKCI_03956	JOHJONHN_04243	CNEDDIJH_04128	JLJGJGIB_03820
mtfA		Protein MtfA	102	102	1	1	9263				593	803	792	DGJMBLJC_04315	HFDHOMNF_01019	ALEPGING_03623	GEOGNNEI_00226	BINKDPLB_03336	IPPPMGOG_02537	NCHKEDON_04079	PLMPIJHD_00084	LIBHOFBA_03529	MFAGDJPO_00084	AICMNGMC_00084	JAGDPAPJ_00227	JICHJFDH_01543	AHEHGMLM_00904	PABJNMJP_03252	MAPHOHON_00227	ONDKMJBG_01739	JDGDJJKN_01796	KLMHLHPE_01916	EGICBAEE_02123	LNEFCFII_00948	NILJAHBC_00950	KCIFOFJF_00227	CJCKLIFP_00950	IABBECJM_00227	LANDOHOG_00226	LOGCBOHO_00226	DKGFALGN_00948	PNFFMGCL_00226	BJCGHIIB_01427	NHHDDJBG_00989	LBLHELLM_03321	CGJPMKCI_01417	JOHJONHN_00002	CNEDDIJH_01250	JLJGJGIB_00504
nhaA		Na(+)/H(+) antiporter NhaA	102	102	1	1	11119				854	1166	1161	DGJMBLJC_00019	HFDHOMNF_02458	ALEPGING_02596	GEOGNNEI_03174	BINKDPLB_00450	IPPPMGOG_03248	NCHKEDON_03612	PLMPIJHD_03417	LIBHOFBA_03192	MFAGDJPO_02517	AICMNGMC_03438	JAGDPAPJ_03435	JICHJFDH_02147	AHEHGMLM_03270	PABJNMJP_04402	MAPHOHON_01660	ONDKMJBG_00323	JDGDJJKN_02403	KLMHLHPE_01604	EGICBAEE_01700	LNEFCFII_02303	NILJAHBC_01608	KCIFOFJF_01372	CJCKLIFP_01811	IABBECJM_02261	LANDOHOG_02260	LOGCBOHO_01838	DKGFALGN_01820	PNFFMGCL_02423	BJCGHIIB_02046	NHHDDJBG_01236	LBLHELLM_01131	CGJPMKCI_02036	JOHJONHN_02233	CNEDDIJH_01645	JLJGJGIB_01493
thrA		Bifunctional aspartokinase/homoserine dehydrogenase 1	102	102	1	1	11194				353	2567	2442	DGJMBLJC_00062	HFDHOMNF_02416	ALEPGING_02635	GEOGNNEI_03135	BINKDPLB_00411	IPPPMGOG_03287	NCHKEDON_03573	PLMPIJHD_03378	LIBHOFBA_03153	MFAGDJPO_02478	AICMNGMC_03399	JAGDPAPJ_03396	JICHJFDH_02186	AHEHGMLM_03309	PABJNMJP_04363	MAPHOHON_01621	ONDKMJBG_00284	JDGDJJKN_02442	KLMHLHPE_01565	EGICBAEE_01739	LNEFCFII_02342	NILJAHBC_01569	KCIFOFJF_01333	CJCKLIFP_01850	IABBECJM_02222	LANDOHOG_02221	LOGCBOHO_01799	DKGFALGN_01781	PNFFMGCL_02384	BJCGHIIB_02085	NHHDDJBG_01197	LBLHELLM_01170	CGJPMKCI_02075	JOHJONHN_02272	CNEDDIJH_01684	JLJGJGIB_01532
group_2970		hypothetical protein	102	102	1	1	16284			Hypothetical protein with no hits to refseq/uniprot/clusters/cdd/tigrfams/pfam overlapping another protein with hits	314	503	497	DGJMBLJC_00186	HFDHOMNF_02303	ALEPGING_03508	GEOGNNEI_03029	BINKDPLB_01152	IPPPMGOG_04432	NCHKEDON_03467	PLMPIJHD_03272	LIBHOFBA_03047	MFAGDJPO_02372	AICMNGMC_03293	JAGDPAPJ_03290	JICHJFDH_02410	AHEHGMLM_02019	PABJNMJP_04205	MAPHOHON_01463	ONDKMJBG_00126	JDGDJJKN_02574	KLMHLHPE_01459	EGICBAEE_01845	LNEFCFII_02448	NILJAHBC_01463	KCIFOFJF_01227	CJCKLIFP_01956	IABBECJM_02116	LANDOHOG_02115	LOGCBOHO_01693	DKGFALGN_01675	PNFFMGCL_02278	BJCGHIIB_02192	NHHDDJBG_01078	LBLHELLM_01289	CGJPMKCI_02181	JOHJONHN_02378	CNEDDIJH_01790	JLJGJGIB_01638
argI		Ornithine carbamoyltransferase subunit I	102	102	1	1	16271				707	1070	1001	DGJMBLJC_00191	HFDHOMNF_02297	ALEPGING_03504	GEOGNNEI_03025	BINKDPLB_01148	IPPPMGOG_04436	NCHKEDON_03463	PLMPIJHD_03268	LIBHOFBA_03043	MFAGDJPO_02368	AICMNGMC_03289	JAGDPAPJ_03286	JICHJFDH_02414	AHEHGMLM_02023	PABJNMJP_04201	MAPHOHON_01459	ONDKMJBG_00122	JDGDJJKN_02578	KLMHLHPE_01455	EGICBAEE_01849	LNEFCFII_02452	NILJAHBC_01459	KCIFOFJF_01223	CJCKLIFP_01960	IABBECJM_02112	LANDOHOG_02111	LOGCBOHO_01689	DKGFALGN_01671	PNFFMGCL_02274	BJCGHIIB_02196	NHHDDJBG_01074	LBLHELLM_01293	CGJPMKCI_02185	JOHJONHN_02382	CNEDDIJH_01794	JLJGJGIB_01642
msrA		Peptide methionine sulfoxide reductase MsrA	102	102	1	1	16182				638	650	638	DGJMBLJC_00257	HFDHOMNF_02134	ALEPGING_00347	GEOGNNEI_03408	BINKDPLB_04315	IPPPMGOG_02861	NCHKEDON_04410	PLMPIJHD_03682	LIBHOFBA_03772	MFAGDJPO_03492	AICMNGMC_03682	JAGDPAPJ_03683	JICHJFDH_02770	AHEHGMLM_01739	PABJNMJP_00672	MAPHOHON_01399	ONDKMJBG_02106	JDGDJJKN_02637	KLMHLHPE_03561	EGICBAEE_02620	LNEFCFII_02511	NILJAHBC_01399	KCIFOFJF_02821	CJCKLIFP_02756	IABBECJM_03008	LANDOHOG_03006	LOGCBOHO_02484	DKGFALGN_03092	PNFFMGCL_03395	BJCGHIIB_03988	NHHDDJBG_03860	LBLHELLM_03664	CGJPMKCI_03809	JOHJONHN_04105	CNEDDIJH_03928	JLJGJGIB_03658
blc		Outer membrane lipoprotein Blc	102	102	1	1	16087				533	533	533	DGJMBLJC_00328	HFDHOMNF_04325	ALEPGING_01967	GEOGNNEI_03477	BINKDPLB_04384	IPPPMGOG_02930	NCHKEDON_04341	PLMPIJHD_03751	LIBHOFBA_03841	MFAGDJPO_03561	AICMNGMC_03751	JAGDPAPJ_03752	JICHJFDH_02701	AHEHGMLM_01808	PABJNMJP_00603	MAPHOHON_01330	ONDKMJBG_02175	JDGDJJKN_02705	KLMHLHPE_03630	EGICBAEE_02689	LNEFCFII_02580	NILJAHBC_01330	KCIFOFJF_02752	CJCKLIFP_02825	IABBECJM_02939	LANDOHOG_02937	LOGCBOHO_02553	DKGFALGN_03023	PNFFMGCL_03464	BJCGHIIB_03824	NHHDDJBG_02426	LBLHELLM_02533	CGJPMKCI_02414	JOHJONHN_04202	CNEDDIJH_01852	JLJGJGIB_01870
group_2994		hypothetical protein	102	102	1	1	16066				476	599	508	DGJMBLJC_00339	HFDHOMNF_04314	ALEPGING_01956	GEOGNNEI_03487	BINKDPLB_04394	IPPPMGOG_02940	NCHKEDON_04331	PLMPIJHD_03761	LIBHOFBA_03851	MFAGDJPO_03571	AICMNGMC_03761	JAGDPAPJ_03762	JICHJFDH_02690	AHEHGMLM_01818	PABJNMJP_00593	MAPHOHON_01320	ONDKMJBG_02185	JDGDJJKN_02715	KLMHLHPE_03640	EGICBAEE_02699	LNEFCFII_02590	NILJAHBC_01320	KCIFOFJF_02742	CJCKLIFP_02835	IABBECJM_02929	LANDOHOG_02927	LOGCBOHO_02563	DKGFALGN_03013	PNFFMGCL_03475	BJCGHIIB_03814	NHHDDJBG_02437	LBLHELLM_02544	CGJPMKCI_02425	JOHJONHN_04192	CNEDDIJH_01862	JLJGJGIB_01880
melA		Alpha-galactosidase	102	102	1	1	15980				194	1352	1337	DGJMBLJC_00472	HFDHOMNF_04284	ALEPGING_01427	GEOGNNEI_03514	BINKDPLB_04422	IPPPMGOG_02967	NCHKEDON_04303	PLMPIJHD_03789	LIBHOFBA_03879	MFAGDJPO_03599	AICMNGMC_03788	JAGDPAPJ_03790	JICHJFDH_04065	AHEHGMLM_01846	PABJNMJP_00566	MAPHOHON_01293	ONDKMJBG_02212	JDGDJJKN_03871	KLMHLHPE_03667	EGICBAEE_02726	LNEFCFII_02617	NILJAHBC_01292	KCIFOFJF_02715	CJCKLIFP_02863	IABBECJM_02901	LANDOHOG_02899	LOGCBOHO_02590	DKGFALGN_02986	PNFFMGCL_03503	BJCGHIIB_03787	NHHDDJBG_02464	LBLHELLM_02571	CGJPMKCI_02452	JOHJONHN_04165	CNEDDIJH_01890	JLJGJGIB_01907
yjcH		Inner membrane protein YjcH	102	102	1	1	15907				209	548	316	DGJMBLJC_00510	HFDHOMNF_04256	ALEPGING_01453	GEOGNNEI_03540	BINKDPLB_04448	IPPPMGOG_02993	NCHKEDON_04277	PLMPIJHD_03815	LIBHOFBA_03905	MFAGDJPO_03625	AICMNGMC_03814	JAGDPAPJ_03816	JICHJFDH_04098	AHEHGMLM_01872	PABJNMJP_00540	MAPHOHON_01267	ONDKMJBG_02238	JDGDJJKN_03846	KLMHLHPE_03901	EGICBAEE_02752	LNEFCFII_02643	NILJAHBC_01266	KCIFOFJF_02689	CJCKLIFP_02889	IABBECJM_02875	LANDOHOG_02873	LOGCBOHO_02616	DKGFALGN_02960	PNFFMGCL_03718	BJCGHIIB_03517	NHHDDJBG_02490	LBLHELLM_02597	CGJPMKCI_02478	JOHJONHN_03307	CNEDDIJH_01916	JLJGJGIB_01933
pepE		Peptidase E	102	102	1	1	15716				602	704	687	DGJMBLJC_00610	HFDHOMNF_04160	ALEPGING_02508	GEOGNNEI_03621	BINKDPLB_01432	IPPPMGOG_03950	NCHKEDON_04197	PLMPIJHD_03895	LIBHOFBA_03985	MFAGDJPO_03705	AICMNGMC_03895	JAGDPAPJ_03896	JICHJFDH_04179	AHEHGMLM_01952	PABJNMJP_00460	MAPHOHON_01186	ONDKMJBG_02318	JDGDJJKN_03765	KLMHLHPE_03820	EGICBAEE_02832	LNEFCFII_02723	NILJAHBC_01186	KCIFOFJF_02608	CJCKLIFP_02969	IABBECJM_02794	LANDOHOG_02793	LOGCBOHO_02696	DKGFALGN_04092	PNFFMGCL_03637	BJCGHIIB_03598	NHHDDJBG_02571	LBLHELLM_02679	CGJPMKCI_02559	JOHJONHN_03226	CNEDDIJH_01996	JLJGJGIB_02014
aceB		Malate synthase A	102	102	1	1	15707				1184	1601	1596	DGJMBLJC_00617	HFDHOMNF_04152	ALEPGING_02515	GEOGNNEI_03628	BINKDPLB_01425	IPPPMGOG_03957	NCHKEDON_04190	PLMPIJHD_03902	LIBHOFBA_03992	MFAGDJPO_03712	AICMNGMC_03902	JAGDPAPJ_03903	JICHJFDH_04186	AHEHGMLM_01959	PABJNMJP_00453	MAPHOHON_01179	ONDKMJBG_02325	JDGDJJKN_03758	KLMHLHPE_04507	EGICBAEE_02839	LNEFCFII_02730	NILJAHBC_01179	KCIFOFJF_02601	CJCKLIFP_02976	IABBECJM_02787	LANDOHOG_02786	LOGCBOHO_02703	DKGFALGN_04099	PNFFMGCL_03630	BJCGHIIB_03605	NHHDDJBG_02578	LBLHELLM_02686	CGJPMKCI_02566	JOHJONHN_03219	CNEDDIJH_02003	JLJGJGIB_02021
citC_2		[Citrate [pro-3S]-lyase] ligase	102	102	1	1	4906				1025	1121	1074	DGJMBLJC_00620	HFDHOMNF_03211	ALEPGING_00063	GEOGNNEI_04058	BINKDPLB_03813	IPPPMGOG_03103	NCHKEDON_04578	PLMPIJHD_04168	LIBHOFBA_04251	MFAGDJPO_04043	AICMNGMC_03971	JAGDPAPJ_04162	JICHJFDH_02906	AHEHGMLM_00298	PABJNMJP_02785	MAPHOHON_03735	ONDKMJBG_03753	JDGDJJKN_00831	KLMHLHPE_02856	EGICBAEE_03368	LNEFCFII_02983	NILJAHBC_03514	KCIFOFJF_03156	CJCKLIFP_03471	IABBECJM_03442	LANDOHOG_03440	LOGCBOHO_03198	DKGFALGN_02805	PNFFMGCL_03565	BJCGHIIB_02661	NHHDDJBG_03319	LBLHELLM_01684	CGJPMKCI_02699	JOHJONHN_03384	CNEDDIJH_03984	JLJGJGIB_03729
entA		2,3-dihydro-2,3-dihydroxybenzoate dehydrogenase	102	102	1	1	4843				248	755	750	DGJMBLJC_00647	HFDHOMNF_03238	ALEPGING_00089	GEOGNNEI_04032	BINKDPLB_03787	IPPPMGOG_03077	NCHKEDON_04552	PLMPIJHD_04142	LIBHOFBA_04225	MFAGDJPO_04017	AICMNGMC_03945	JAGDPAPJ_04136	JICHJFDH_02880	AHEHGMLM_00324	PABJNMJP_02759	MAPHOHON_03761	ONDKMJBG_03779	JDGDJJKN_00857	KLMHLHPE_02882	EGICBAEE_03394	LNEFCFII_02957	NILJAHBC_03540	KCIFOFJF_03182	CJCKLIFP_03497	IABBECJM_03416	LANDOHOG_03414	LOGCBOHO_03224	DKGFALGN_02779	PNFFMGCL_03539	BJCGHIIB_02635	NHHDDJBG_03293	LBLHELLM_01710	CGJPMKCI_02725	JOHJONHN_03358	CNEDDIJH_04010	JLJGJGIB_03703
tesA		Thioesterase 1/protease 1/lysophospholipase L1	102	102	1	1	345				449	584	582	DGJMBLJC_00734	HFDHOMNF_01620	ALEPGING_00447	GEOGNNEI_01738	BINKDPLB_02411	IPPPMGOG_00529	NCHKEDON_02971	PLMPIJHD_01532	LIBHOFBA_01342	MFAGDJPO_01513	AICMNGMC_04590	JAGDPAPJ_04643	JICHJFDH_00259	AHEHGMLM_03548	PABJNMJP_01941	MAPHOHON_03563	ONDKMJBG_04422	JDGDJJKN_00950	KLMHLHPE_03501	EGICBAEE_02342	LNEFCFII_03510	NILJAHBC_02757	KCIFOFJF_02056	CJCKLIFP_02695	IABBECJM_02737	LANDOHOG_02519	LOGCBOHO_03806	DKGFALGN_02296	PNFFMGCL_03196	BJCGHIIB_03285	NHHDDJBG_02962	LBLHELLM_03020	CGJPMKCI_03308	JOHJONHN_02882	CNEDDIJH_02858	JLJGJGIB_02880
priA		Primosomal protein N'	102	102	1	1	15579				1538	2198	2189	DGJMBLJC_00821	HFDHOMNF_01752	ALEPGING_01540	GEOGNNEI_02205	BINKDPLB_02258	IPPPMGOG_03608	NCHKEDON_03209	PLMPIJHD_02329	LIBHOFBA_02138	MFAGDJPO_02124	AICMNGMC_02249	JAGDPAPJ_02322	JICHJFDH_03930	AHEHGMLM_02400	PABJNMJP_04757	MAPHOHON_04336	ONDKMJBG_04516	JDGDJJKN_03920	KLMHLHPE_03795	EGICBAEE_04281	LNEFCFII_04297	NILJAHBC_04272	KCIFOFJF_04175	CJCKLIFP_04267	IABBECJM_04321	LANDOHOG_04268	LOGCBOHO_04319	DKGFALGN_04143	PNFFMGCL_02961	BJCGHIIB_03074	NHHDDJBG_03243	LBLHELLM_03134	CGJPMKCI_03374	JOHJONHN_03075	CNEDDIJH_03873	JLJGJGIB_04041
group_3037		hypothetical protein	102	102	1	1	15560				539	599	595	DGJMBLJC_00835	HFDHOMNF_01765	ALEPGING_01553	GEOGNNEI_02218	BINKDPLB_02271	IPPPMGOG_03621	NCHKEDON_03222	PLMPIJHD_02342	LIBHOFBA_02151	MFAGDJPO_02137	AICMNGMC_02262	JAGDPAPJ_02335	JICHJFDH_03943	AHEHGMLM_02413	PABJNMJP_04770	MAPHOHON_04323	ONDKMJBG_04503	JDGDJJKN_03933	KLMHLHPE_03782	EGICBAEE_04268	LNEFCFII_04310	NILJAHBC_04259	KCIFOFJF_04188	CJCKLIFP_04280	IABBECJM_04308	LANDOHOG_04255	LOGCBOHO_04306	DKGFALGN_04130	PNFFMGCL_02974	BJCGHIIB_03061	NHHDDJBG_03230	LBLHELLM_03147	CGJPMKCI_03387	JOHJONHN_03062	CNEDDIJH_03886	JLJGJGIB_04054
sbp		Sulfate-binding protein	102	102	1	1	15536				989	989	989	DGJMBLJC_00844	HFDHOMNF_01784	ALEPGING_01370	GEOGNNEI_02236	BINKDPLB_02289	IPPPMGOG_03639	NCHKEDON_03240	PLMPIJHD_02360	LIBHOFBA_02169	MFAGDJPO_02155	AICMNGMC_02280	JAGDPAPJ_02353	JICHJFDH_03961	AHEHGMLM_02431	PABJNMJP_04788	MAPHOHON_04305	ONDKMJBG_04485	JDGDJJKN_03951	KLMHLHPE_03764	EGICBAEE_04250	LNEFCFII_04328	NILJAHBC_04241	KCIFOFJF_04206	CJCKLIFP_04298	IABBECJM_04290	LANDOHOG_04237	LOGCBOHO_04288	DKGFALGN_04112	PNFFMGCL_02992	BJCGHIIB_03043	NHHDDJBG_03212	LBLHELLM_03165	CGJPMKCI_03405	JOHJONHN_03044	CNEDDIJH_03904	JLJGJGIB_03342
cpxP		Periplasmic protein CpxP	102	102	1	1	15509				380	500	498	DGJMBLJC_00847	HFDHOMNF_01787	ALEPGING_01373	GEOGNNEI_02003	BINKDPLB_01661	IPPPMGOG_03642	NCHKEDON_02057	PLMPIJHD_02007	LIBHOFBA_01815	MFAGDJPO_01874	AICMNGMC_01848	JAGDPAPJ_02007	JICHJFDH_03964	AHEHGMLM_02526	PABJNMJP_03043	MAPHOHON_03952	ONDKMJBG_02413	JDGDJJKN_03954	KLMHLHPE_03761	EGICBAEE_03981	LNEFCFII_04093	NILJAHBC_04110	KCIFOFJF_03989	CJCKLIFP_04119	IABBECJM_04162	LANDOHOG_04109	LOGCBOHO_04157	DKGFALGN_03697	PNFFMGCL_03033	BJCGHIIB_03002	NHHDDJBG_03209	LBLHELLM_03168	CGJPMKCI_03408	JOHJONHN_02999	CNEDDIJH_03467	JLJGJGIB_03301
sodA		Superoxide dismutase [Mn]	102	102	1	1	15456				620	626	620	DGJMBLJC_00853	HFDHOMNF_01792	ALEPGING_01378	GEOGNNEI_01998	BINKDPLB_01656	IPPPMGOG_03647	NCHKEDON_02062	PLMPIJHD_02012	LIBHOFBA_01820	MFAGDJPO_01879	AICMNGMC_01853	JAGDPAPJ_02012	JICHJFDH_03969	AHEHGMLM_02531	PABJNMJP_03038	MAPHOHON_03947	ONDKMJBG_02418	JDGDJJKN_03959	KLMHLHPE_03756	EGICBAEE_03976	LNEFCFII_04088	NILJAHBC_04105	KCIFOFJF_03994	CJCKLIFP_04114	IABBECJM_04157	LANDOHOG_04104	LOGCBOHO_04152	DKGFALGN_03692	PNFFMGCL_03038	BJCGHIIB_02997	NHHDDJBG_03204	LBLHELLM_03173	CGJPMKCI_03413	JOHJONHN_02994	CNEDDIJH_03462	JLJGJGIB_03296
group_3058		hypothetical protein	102	102	1	1	10635				1238	1277	1276	DGJMBLJC_00985	HFDHOMNF_02945	ALEPGING_00855	GEOGNNEI_02821	BINKDPLB_01949	IPPPMGOG_01430	NCHKEDON_00989	PLMPIJHD_02789	LIBHOFBA_02601	MFAGDJPO_01409	AICMNGMC_02909	JAGDPAPJ_02844	JICHJFDH_03509	AHEHGMLM_02117	PABJNMJP_04092	MAPHOHON_03841	ONDKMJBG_03224	JDGDJJKN_03119	KLMHLHPE_02313	EGICBAEE_01440	LNEFCFII_02043	NILJAHBC_02336	KCIFOFJF_03262	CJCKLIFP_01551	IABBECJM_01693	LANDOHOG_02017	LOGCBOHO_02098	DKGFALGN_02507	PNFFMGCL_01731	BJCGHIIB_01983	NHHDDJBG_01789	LBLHELLM_00942	CGJPMKCI_01888	JOHJONHN_02096	CNEDDIJH_01582	JLJGJGIB_01356
dtpC		Dipeptide and tripeptide permease C	102	102	1	1	10645				1187	1469	1457	DGJMBLJC_00994	HFDHOMNF_02934	ALEPGING_00848	GEOGNNEI_02828	BINKDPLB_01956	IPPPMGOG_01437	NCHKEDON_00996	PLMPIJHD_02796	LIBHOFBA_02608	MFAGDJPO_01416	AICMNGMC_02916	JAGDPAPJ_02851	JICHJFDH_03502	AHEHGMLM_02110	PABJNMJP_04099	MAPHOHON_03834	ONDKMJBG_03231	JDGDJJKN_03126	KLMHLHPE_02320	EGICBAEE_01447	LNEFCFII_02050	NILJAHBC_02329	KCIFOFJF_03255	CJCKLIFP_01558	IABBECJM_01686	LANDOHOG_02024	LOGCBOHO_02091	DKGFALGN_02514	PNFFMGCL_01724	BJCGHIIB_01990	NHHDDJBG_01796	LBLHELLM_00935	CGJPMKCI_01881	JOHJONHN_02089	CNEDDIJH_01589	JLJGJGIB_01349
murR		HTH-type transcriptional regulator MurR	102	102	1	1	10664				521	848	844	DGJMBLJC_01007	HFDHOMNF_02921	ALEPGING_02549	GEOGNNEI_02839	BINKDPLB_01967	IPPPMGOG_01448	NCHKEDON_01007	PLMPIJHD_02807	LIBHOFBA_02619	MFAGDJPO_01427	AICMNGMC_02927	JAGDPAPJ_02862	JICHJFDH_03491	AHEHGMLM_02099	PABJNMJP_04110	MAPHOHON_03823	ONDKMJBG_03242	JDGDJJKN_03137	KLMHLHPE_02331	EGICBAEE_01458	LNEFCFII_02061	NILJAHBC_02318	KCIFOFJF_03244	CJCKLIFP_01569	IABBECJM_01675	LANDOHOG_02035	LOGCBOHO_02080	DKGFALGN_02525	PNFFMGCL_01713	BJCGHIIB_02001	NHHDDJBG_01807	LBLHELLM_00924	CGJPMKCI_01870	JOHJONHN_02078	CNEDDIJH_01600	JLJGJGIB_01338
leuS		Leucine--tRNA ligase	102	102	1	1	4941				1445	2771	2574	DGJMBLJC_01064	HFDHOMNF_03187	ALEPGING_00039	GEOGNNEI_04082	BINKDPLB_03837	IPPPMGOG_03127	NCHKEDON_04602	PLMPIJHD_04192	LIBHOFBA_04275	MFAGDJPO_04067	AICMNGMC_03995	JAGDPAPJ_04186	JICHJFDH_02930	AHEHGMLM_00274	PABJNMJP_02809	MAPHOHON_03711	ONDKMJBG_03729	JDGDJJKN_00807	KLMHLHPE_02832	EGICBAEE_03344	LNEFCFII_03007	NILJAHBC_03490	KCIFOFJF_03132	CJCKLIFP_03447	IABBECJM_03466	LANDOHOG_03464	LOGCBOHO_03174	DKGFALGN_02829	PNFFMGCL_03589	BJCGHIIB_02685	NHHDDJBG_03343	LBLHELLM_01660	CGJPMKCI_02675	JOHJONHN_03408	CNEDDIJH_04064	JLJGJGIB_03769
glnQ_2		Glutamine transport ATP-binding protein GlnQ	102	102	1	1	4964				680	725	724	DGJMBLJC_01081	HFDHOMNF_03171	ALEPGING_00025	GEOGNNEI_04096	BINKDPLB_03851	IPPPMGOG_03141	NCHKEDON_04616	PLMPIJHD_04206	LIBHOFBA_04289	MFAGDJPO_04081	AICMNGMC_04009	JAGDPAPJ_04200	JICHJFDH_02944	AHEHGMLM_00260	PABJNMJP_02823	MAPHOHON_03697	ONDKMJBG_03715	JDGDJJKN_00793	KLMHLHPE_02818	EGICBAEE_03330	LNEFCFII_03021	NILJAHBC_03476	KCIFOFJF_03118	CJCKLIFP_03433	IABBECJM_03480	LANDOHOG_03478	LOGCBOHO_03160	DKGFALGN_02843	PNFFMGCL_03603	BJCGHIIB_02699	NHHDDJBG_03357	LBLHELLM_01646	CGJPMKCI_02661	JOHJONHN_03422	CNEDDIJH_04078	JLJGJGIB_03755
ybeY		Endoribonuclease YbeY	102	102	1	1	4971				278	473	470	DGJMBLJC_01087	HFDHOMNF_03165	ALEPGING_00019	GEOGNNEI_04102	BINKDPLB_03857	IPPPMGOG_03147	NCHKEDON_04622	PLMPIJHD_04212	LIBHOFBA_04295	MFAGDJPO_04087	AICMNGMC_04015	JAGDPAPJ_04206	JICHJFDH_02950	AHEHGMLM_00254	PABJNMJP_02829	MAPHOHON_03691	ONDKMJBG_03709	JDGDJJKN_00787	KLMHLHPE_02812	EGICBAEE_03324	LNEFCFII_03027	NILJAHBC_03470	KCIFOFJF_03112	CJCKLIFP_03427	IABBECJM_03486	LANDOHOG_03484	LOGCBOHO_03154	DKGFALGN_02849	PNFFMGCL_03609	BJCGHIIB_02705	NHHDDJBG_03363	LBLHELLM_01640	CGJPMKCI_02655	JOHJONHN_03428	CNEDDIJH_04084	JLJGJGIB_03749
asnB		Asparagine synthetase B [glutamine-hydrolyzing]	102	102	1	1	4980				263	1664	1647	DGJMBLJC_01096	HFDHOMNF_03155	ALEPGING_00009	GEOGNNEI_04114	BINKDPLB_03869	IPPPMGOG_03159	NCHKEDON_04634	PLMPIJHD_04224	LIBHOFBA_04307	MFAGDJPO_04099	AICMNGMC_04027	JAGDPAPJ_04218	JICHJFDH_02961	AHEHGMLM_00242	PABJNMJP_02841	MAPHOHON_03679	ONDKMJBG_03697	JDGDJJKN_00775	KLMHLHPE_02800	EGICBAEE_03312	LNEFCFII_03039	NILJAHBC_03458	KCIFOFJF_03100	CJCKLIFP_03415	IABBECJM_03498	LANDOHOG_03496	LOGCBOHO_03142	DKGFALGN_02861	PNFFMGCL_03621	BJCGHIIB_02717	NHHDDJBG_03375	LBLHELLM_01628	CGJPMKCI_02643	JOHJONHN_03439	CNEDDIJH_04096	JLJGJGIB_03738
nagA		N-acetylglucosamine-6-phosphate deacetylase	102	102	1	1	4984				1154	1214	1212	DGJMBLJC_01099	HFDHOMNF_03152	ALEPGING_00006	GEOGNNEI_04117	BINKDPLB_03872	IPPPMGOG_03162	NCHKEDON_04637	PLMPIJHD_04227	LIBHOFBA_04310	MFAGDJPO_04102	AICMNGMC_04030	JAGDPAPJ_04221	JICHJFDH_02964	AHEHGMLM_00239	PABJNMJP_02844	MAPHOHON_03676	ONDKMJBG_03694	JDGDJJKN_00772	KLMHLHPE_02797	EGICBAEE_03309	LNEFCFII_03042	NILJAHBC_03455	KCIFOFJF_03097	CJCKLIFP_03412	IABBECJM_03501	LANDOHOG_03499	LOGCBOHO_03139	DKGFALGN_02864	PNFFMGCL_03624	BJCGHIIB_02720	NHHDDJBG_03378	LBLHELLM_01625	CGJPMKCI_02640	JOHJONHN_03442	CNEDDIJH_04099	JLJGJGIB_03735
group_3081		hypothetical protein	102	102	1	1	5021				119	206	205	DGJMBLJC_01128	HFDHOMNF_03123	ALEPGING_00522	GEOGNNEI_04142	BINKDPLB_03897	IPPPMGOG_03187	NCHKEDON_04662	PLMPIJHD_04252	LIBHOFBA_04335	MFAGDJPO_04127	AICMNGMC_04055	JAGDPAPJ_04246	JICHJFDH_00743	AHEHGMLM_03676	PABJNMJP_02869	MAPHOHON_04462	ONDKMJBG_03669	JDGDJJKN_00747	KLMHLHPE_02772	EGICBAEE_03284	LNEFCFII_03067	NILJAHBC_03430	KCIFOFJF_03072	CJCKLIFP_03387	IABBECJM_03526	LANDOHOG_03524	LOGCBOHO_03114	DKGFALGN_02889	PNFFMGCL_04016	BJCGHIIB_02745	NHHDDJBG_03998	LBLHELLM_03817	CGJPMKCI_02615	JOHJONHN_04070	CNEDDIJH_03761	JLJGJGIB_03911
phrB		Deoxyribodipyrimidine photo-lyase	102	102	1	1	5023				1340	1421	1420	DGJMBLJC_01129	HFDHOMNF_03122	ALEPGING_00523	GEOGNNEI_04143	BINKDPLB_03898	IPPPMGOG_03188	NCHKEDON_04663	PLMPIJHD_04253	LIBHOFBA_04336	MFAGDJPO_04128	AICMNGMC_04056	JAGDPAPJ_04247	JICHJFDH_00744	AHEHGMLM_03675	PABJNMJP_02870	MAPHOHON_04463	ONDKMJBG_03668	JDGDJJKN_00746	KLMHLHPE_02771	EGICBAEE_03283	LNEFCFII_03068	NILJAHBC_03429	KCIFOFJF_03071	CJCKLIFP_03386	IABBECJM_03527	LANDOHOG_03525	LOGCBOHO_03113	DKGFALGN_02890	PNFFMGCL_04015	BJCGHIIB_02746	NHHDDJBG_03997	LBLHELLM_03818	CGJPMKCI_02614	JOHJONHN_04069	CNEDDIJH_03760	JLJGJGIB_03912
ybgK		putative protein YbgK	102	102	1	1	5033				647	932	929	DGJMBLJC_01133	HFDHOMNF_03118	ALEPGING_00527	GEOGNNEI_04147	BINKDPLB_03902	IPPPMGOG_03192	NCHKEDON_04667	PLMPIJHD_04257	LIBHOFBA_04340	MFAGDJPO_04132	AICMNGMC_04060	JAGDPAPJ_04251	JICHJFDH_00748	AHEHGMLM_03671	PABJNMJP_02874	MAPHOHON_04467	ONDKMJBG_03664	JDGDJJKN_00742	KLMHLHPE_02767	EGICBAEE_03279	LNEFCFII_03072	NILJAHBC_03425	KCIFOFJF_03067	CJCKLIFP_03382	IABBECJM_03531	LANDOHOG_03529	LOGCBOHO_03109	DKGFALGN_02894	PNFFMGCL_04011	BJCGHIIB_02750	NHHDDJBG_03993	LBLHELLM_03822	CGJPMKCI_02610	JOHJONHN_04065	CNEDDIJH_03756	JLJGJGIB_03916
group_3085		hypothetical protein	102	102	1	1	5063				1046	1046	1046	DGJMBLJC_01137	HFDHOMNF_03115	ALEPGING_00530	GEOGNNEI_04150	BINKDPLB_03905	IPPPMGOG_03195	NCHKEDON_04670	PLMPIJHD_04260	LIBHOFBA_04343	MFAGDJPO_04135	AICMNGMC_04063	JAGDPAPJ_04254	JICHJFDH_00751	AHEHGMLM_03668	PABJNMJP_02877	MAPHOHON_04470	ONDKMJBG_03661	JDGDJJKN_00739	KLMHLHPE_02764	EGICBAEE_03276	LNEFCFII_03075	NILJAHBC_03422	KCIFOFJF_03064	CJCKLIFP_03379	IABBECJM_03534	LANDOHOG_03532	LOGCBOHO_03106	DKGFALGN_02897	PNFFMGCL_04008	BJCGHIIB_02753	NHHDDJBG_03990	LBLHELLM_03825	CGJPMKCI_02607	JOHJONHN_04062	CNEDDIJH_03753	JLJGJGIB_03919
rarA		Replication-associated recombination protein A	102	102	1	1	5415				995	1343	1338	DGJMBLJC_01168	HFDHOMNF_01312	ALEPGING_03301	GEOGNNEI_04457	BINKDPLB_03094	IPPPMGOG_03036	NCHKEDON_03254	PLMPIJHD_04568	LIBHOFBA_04651	MFAGDJPO_04587	AICMNGMC_04376	JAGDPAPJ_04561	JICHJFDH_00876	AHEHGMLM_02261	PABJNMJP_01844	MAPHOHON_03415	ONDKMJBG_04228	JDGDJJKN_00556	KLMHLHPE_03307	EGICBAEE_03460	LNEFCFII_03317	NILJAHBC_03671	KCIFOFJF_03456	CJCKLIFP_03780	IABBECJM_03823	LANDOHOG_03604	LOGCBOHO_03678	DKGFALGN_03362	PNFFMGCL_04168	BJCGHIIB_03727	NHHDDJBG_03384	LBLHELLM_04084	CGJPMKCI_03697	JOHJONHN_03660	CNEDDIJH_03182	JLJGJGIB_02650
clpA		ATP-dependent Clp protease ATP-binding subunit ClpA	102	102	1	1	5377				1508	2276	2262	DGJMBLJC_01184	HFDHOMNF_01330	ALEPGING_03084	GEOGNNEI_04443	BINKDPLB_01586	IPPPMGOG_03401	NCHKEDON_01593	PLMPIJHD_04554	LIBHOFBA_04637	MFAGDJPO_04573	AICMNGMC_04362	JAGDPAPJ_04547	JICHJFDH_00861	AHEHGMLM_02246	PABJNMJP_01829	MAPHOHON_03430	ONDKMJBG_04243	JDGDJJKN_00570	KLMHLHPE_03321	EGICBAEE_03474	LNEFCFII_03331	NILJAHBC_03657	KCIFOFJF_03442	CJCKLIFP_03766	IABBECJM_03809	LANDOHOG_03618	LOGCBOHO_03664	DKGFALGN_03348	PNFFMGCL_04154	BJCGHIIB_03713	NHHDDJBG_03398	LBLHELLM_04070	CGJPMKCI_03711	JOHJONHN_03646	CNEDDIJH_03168	JLJGJGIB_02636
macA		Macrolide export protein MacA	102	102	1	1	5371				1004	1118	1115	DGJMBLJC_01189	HFDHOMNF_01334	ALEPGING_03088	GEOGNNEI_04439	BINKDPLB_01582	IPPPMGOG_03405	NCHKEDON_01589	PLMPIJHD_04550	LIBHOFBA_04633	MFAGDJPO_04569	AICMNGMC_04358	JAGDPAPJ_04543	JICHJFDH_00857	AHEHGMLM_02242	PABJNMJP_01825	MAPHOHON_03434	ONDKMJBG_04247	JDGDJJKN_00574	KLMHLHPE_03325	EGICBAEE_03478	LNEFCFII_03335	NILJAHBC_03653	KCIFOFJF_03438	CJCKLIFP_03762	IABBECJM_03805	LANDOHOG_03622	LOGCBOHO_03660	DKGFALGN_03344	PNFFMGCL_04150	BJCGHIIB_03709	NHHDDJBG_03402	LBLHELLM_04066	CGJPMKCI_03715	JOHJONHN_03642	CNEDDIJH_03164	JLJGJGIB_02632
dacC		D-alanyl-D-alanine carboxypeptidase DacC	102	102	1	1	5313				872	1202	1101	DGJMBLJC_01237	HFDHOMNF_01378	ALEPGING_00499	GEOGNNEI_04399	BINKDPLB_01542	IPPPMGOG_03445	NCHKEDON_01549	PLMPIJHD_04510	LIBHOFBA_04593	MFAGDJPO_04529	AICMNGMC_04318	JAGDPAPJ_04503	JICHJFDH_00817	AHEHGMLM_02202	PABJNMJP_01785	MAPHOHON_03474	ONDKMJBG_04287	JDGDJJKN_00614	KLMHLHPE_03365	EGICBAEE_03518	LNEFCFII_03375	NILJAHBC_03613	KCIFOFJF_03398	CJCKLIFP_03722	IABBECJM_03765	LANDOHOG_03662	LOGCBOHO_03620	DKGFALGN_03304	PNFFMGCL_03910	BJCGHIIB_04083	NHHDDJBG_03442	LBLHELLM_03701	CGJPMKCI_03886	JOHJONHN_03602	CNEDDIJH_03123	JLJGJGIB_02592
gstB		Glutathione S-transferase GstB	102	102	1	1	5312				593	626	625	DGJMBLJC_01238	HFDHOMNF_01379	ALEPGING_00498	GEOGNNEI_04398	BINKDPLB_01541	IPPPMGOG_03446	NCHKEDON_01548	PLMPIJHD_04509	LIBHOFBA_04592	MFAGDJPO_04528	AICMNGMC_04317	JAGDPAPJ_04502	JICHJFDH_00816	AHEHGMLM_02201	PABJNMJP_01784	MAPHOHON_03475	ONDKMJBG_04288	JDGDJJKN_00615	KLMHLHPE_03366	EGICBAEE_03519	LNEFCFII_03376	NILJAHBC_03612	KCIFOFJF_03397	CJCKLIFP_03721	IABBECJM_03764	LANDOHOG_03663	LOGCBOHO_03619	DKGFALGN_03303	PNFFMGCL_03909	BJCGHIIB_04082	NHHDDJBG_03443	LBLHELLM_03702	CGJPMKCI_03887	JOHJONHN_03601	CNEDDIJH_03122	JLJGJGIB_02591
group_3109		hypothetical protein	102	102	1	1	5310				197	383	379	DGJMBLJC_01240	HFDHOMNF_01390	ALEPGING_03571	GEOGNNEI_04387	BINKDPLB_01530	IPPPMGOG_03457	NCHKEDON_01537	PLMPIJHD_04498	LIBHOFBA_04581	MFAGDJPO_04517	AICMNGMC_04306	JAGDPAPJ_04491	JICHJFDH_00805	AHEHGMLM_02190	PABJNMJP_01773	MAPHOHON_03486	ONDKMJBG_04299	JDGDJJKN_00617	KLMHLHPE_03377	EGICBAEE_03531	LNEFCFII_03387	NILJAHBC_03601	KCIFOFJF_03386	CJCKLIFP_03710	IABBECJM_03753	LANDOHOG_03674	LOGCBOHO_03608	DKGFALGN_03292	PNFFMGCL_03898	BJCGHIIB_04071	NHHDDJBG_03454	LBLHELLM_03713	CGJPMKCI_03898	JOHJONHN_03590	CNEDDIJH_03111	JLJGJGIB_02580
mltB		Membrane-bound lytic murein transglycosylase B	102	102	1	1	2165				1076	1169	1079	DGJMBLJC_01290	HFDHOMNF_03434	ALEPGING_02310	GEOGNNEI_01302	BINKDPLB_00063	IPPPMGOG_01094	NCHKEDON_01394	PLMPIJHD_01096	LIBHOFBA_00906	MFAGDJPO_03074	AICMNGMC_01097	JAGDPAPJ_01240	JICHJFDH_00106	AHEHGMLM_02661	PABJNMJP_00388	MAPHOHON_02259	ONDKMJBG_00597	JDGDJJKN_01588	KLMHLHPE_01304	EGICBAEE_00960	LNEFCFII_01280	NILJAHBC_01925	KCIFOFJF_01946	CJCKLIFP_02068	IABBECJM_01283	LANDOHOG_01538	LOGCBOHO_01538	DKGFALGN_01563	PNFFMGCL_01620	BJCGHIIB_01098	NHHDDJBG_00063	LBLHELLM_00064	CGJPMKCI_01260	JOHJONHN_01014	CNEDDIJH_00618	JLJGJGIB_00568
srlA		PTS system glucitol/sorbitol-specific EIIC component	102	102	1	1	2164				293	563	560	DGJMBLJC_01291	HFDHOMNF_03435	ALEPGING_02311	GEOGNNEI_01303	BINKDPLB_00064	IPPPMGOG_01093	NCHKEDON_01393	PLMPIJHD_01097	LIBHOFBA_00907	MFAGDJPO_03075	AICMNGMC_01098	JAGDPAPJ_01241	JICHJFDH_00107	AHEHGMLM_02660	PABJNMJP_00387	MAPHOHON_02258	ONDKMJBG_00598	JDGDJJKN_01587	KLMHLHPE_01303	EGICBAEE_00959	LNEFCFII_01281	NILJAHBC_01926	KCIFOFJF_01945	CJCKLIFP_02069	IABBECJM_01284	LANDOHOG_01537	LOGCBOHO_01537	DKGFALGN_01562	PNFFMGCL_01619	BJCGHIIB_01097	NHHDDJBG_00064	LBLHELLM_00065	CGJPMKCI_01259	JOHJONHN_01013	CNEDDIJH_00619	JLJGJGIB_00569
cysC		Adenylyl-sulfate kinase	102	102	1	1	2009				320	605	602	DGJMBLJC_01400	HFDHOMNF_03543	ALEPGING_00738	GEOGNNEI_01403	BINKDPLB_00164	IPPPMGOG_00993	NCHKEDON_01293	PLMPIJHD_01197	LIBHOFBA_01007	MFAGDJPO_03175	AICMNGMC_01198	JAGDPAPJ_01341	JICHJFDH_00207	AHEHGMLM_02459	PABJNMJP_00287	MAPHOHON_02158	ONDKMJBG_00698	JDGDJJKN_01485	KLMHLHPE_01203	EGICBAEE_00859	LNEFCFII_01381	NILJAHBC_02026	KCIFOFJF_01845	CJCKLIFP_02169	IABBECJM_01384	LANDOHOG_01437	LOGCBOHO_01437	DKGFALGN_01462	PNFFMGCL_01519	BJCGHIIB_00997	NHHDDJBG_00164	LBLHELLM_00165	CGJPMKCI_01159	JOHJONHN_00913	CNEDDIJH_00719	JLJGJGIB_00669
qseC_1		Sensor protein QseC	102	102	1	1	2231				1397	1418	1414	DGJMBLJC_01456	HFDHOMNF_03378	ALEPGING_03956	GEOGNNEI_01251	BINKDPLB_00012	IPPPMGOG_01144	NCHKEDON_02736	PLMPIJHD_01045	LIBHOFBA_00855	MFAGDJPO_03023	AICMNGMC_01046	JAGDPAPJ_01189	JICHJFDH_00056	AHEHGMLM_02710	PABJNMJP_00439	MAPHOHON_02308	ONDKMJBG_00546	JDGDJJKN_01636	KLMHLHPE_01353	EGICBAEE_01011	LNEFCFII_01231	NILJAHBC_01876	KCIFOFJF_01997	CJCKLIFP_02017	IABBECJM_01234	LANDOHOG_01587	LOGCBOHO_01587	DKGFALGN_01614	PNFFMGCL_01671	BJCGHIIB_01149	NHHDDJBG_00012	LBLHELLM_00013	CGJPMKCI_01309	JOHJONHN_01065	CNEDDIJH_00567	JLJGJGIB_00517
yqaB		Fructose-1-phosphate phosphatase YqaB	102	102	1	1	2174				566	569	566	DGJMBLJC_01499	HFDHOMNF_03423	ALEPGING_02299	GEOGNNEI_01289	BINKDPLB_00050	IPPPMGOG_01106	NCHKEDON_02698	PLMPIJHD_01083	LIBHOFBA_00893	MFAGDJPO_03061	AICMNGMC_01084	JAGDPAPJ_01227	JICHJFDH_00095	AHEHGMLM_02672	PABJNMJP_00401	MAPHOHON_02270	ONDKMJBG_00584	JDGDJJKN_01599	KLMHLHPE_01315	EGICBAEE_00973	LNEFCFII_01269	NILJAHBC_01914	KCIFOFJF_01959	CJCKLIFP_02055	IABBECJM_01272	LANDOHOG_01549	LOGCBOHO_01549	DKGFALGN_01576	PNFFMGCL_01633	BJCGHIIB_01111	NHHDDJBG_00050	LBLHELLM_00051	CGJPMKCI_01271	JOHJONHN_01027	CNEDDIJH_00605	JLJGJGIB_00555
codA		Cytosine deaminase	102	102	1	1	13483				1280	1280	1280	DGJMBLJC_01519	HFDHOMNF_01255	ALEPGING_00932	GEOGNNEI_02363	BINKDPLB_02551	IPPPMGOG_00047	NCHKEDON_01254	PLMPIJHD_02991	LIBHOFBA_02803	MFAGDJPO_02772	AICMNGMC_03056	JAGDPAPJ_02991	JICHJFDH_03698	AHEHGMLM_04177	PABJNMJP_02318	MAPHOHON_03246	ONDKMJBG_04553	JDGDJJKN_01046	KLMHLHPE_04342	EGICBAEE_04409	LNEFCFII_04464	NILJAHBC_04438	KCIFOFJF_04455	CJCKLIFP_03663	IABBECJM_03706	LANDOHOG_04434	LOGCBOHO_03561	DKGFALGN_04261	PNFFMGCL_04099	BJCGHIIB_04177	NHHDDJBG_04037	LBLHELLM_04015	CGJPMKCI_04041	JOHJONHN_04368	CNEDDIJH_04317	JLJGJGIB_04127
group_3135		hypothetical protein	102	102	1	1	13475				710	929	926	DGJMBLJC_01525	HFDHOMNF_01250	ALEPGING_00937	GEOGNNEI_02368	BINKDPLB_02556	IPPPMGOG_00042	NCHKEDON_01259	PLMPIJHD_02996	LIBHOFBA_02808	MFAGDJPO_02777	AICMNGMC_03061	JAGDPAPJ_02996	JICHJFDH_03693	AHEHGMLM_04182	PABJNMJP_02323	MAPHOHON_03251	ONDKMJBG_04558	JDGDJJKN_01051	KLMHLHPE_04347	EGICBAEE_04414	LNEFCFII_04459	NILJAHBC_04443	KCIFOFJF_04450	CJCKLIFP_03658	IABBECJM_03701	LANDOHOG_04439	LOGCBOHO_03556	DKGFALGN_04266	PNFFMGCL_04104	BJCGHIIB_04182	NHHDDJBG_04042	LBLHELLM_04020	CGJPMKCI_04046	JOHJONHN_04373	CNEDDIJH_04312	JLJGJGIB_04118
elbB		Glyoxalase ElbB	102	102	1	1	13473				317	653	649	DGJMBLJC_01528	HFDHOMNF_01248	ALEPGING_00939	GEOGNNEI_02370	BINKDPLB_02558	IPPPMGOG_00040	NCHKEDON_01261	PLMPIJHD_02998	LIBHOFBA_02810	MFAGDJPO_02779	AICMNGMC_03063	JAGDPAPJ_02998	JICHJFDH_03691	AHEHGMLM_04184	PABJNMJP_02325	MAPHOHON_03253	ONDKMJBG_04560	JDGDJJKN_01053	KLMHLHPE_04349	EGICBAEE_04416	LNEFCFII_04457	NILJAHBC_04445	KCIFOFJF_04448	CJCKLIFP_03656	IABBECJM_03699	LANDOHOG_04441	LOGCBOHO_03554	DKGFALGN_04268	PNFFMGCL_04106	BJCGHIIB_04184	NHHDDJBG_04044	LBLHELLM_04022	CGJPMKCI_04048	JOHJONHN_04375	CNEDDIJH_04310	JLJGJGIB_04116
wecE		dTDP-4-amino-4,6-dideoxygalactose transaminase	102	102	1	1	15251				701	1130	1125	DGJMBLJC_01644	HFDHOMNF_02020	ALEPGING_04228	GEOGNNEI_02061	BINKDPLB_02503	IPPPMGOG_01308	NCHKEDON_04486	PLMPIJHD_02103	LIBHOFBA_01911	MFAGDJPO_01970	AICMNGMC_01944	JAGDPAPJ_02103	JICHJFDH_03847	AHEHGMLM_04431	PABJNMJP_00751	MAPHOHON_04046	ONDKMJBG_01992	JDGDJJKN_04156	KLMHLHPE_04147	EGICBAEE_04042	LNEFCFII_04187	NILJAHBC_04204	KCIFOFJF_04118	CJCKLIFP_04210	IABBECJM_04220	LANDOHOG_04167	LOGCBOHO_04218	DKGFALGN_03758	PNFFMGCL_03745	BJCGHIIB_03667	NHHDDJBG_03609	LBLHELLM_03487	CGJPMKCI_03637	JOHJONHN_03935	CNEDDIJH_03561	JLJGJGIB_03479
wecF		TDP-N-acetylfucosamine:lipid II N-acetylfucosaminyltransferase	102	102	1	1	15253				1079	1079	1079	DGJMBLJC_01647	HFDHOMNF_02018	ALEPGING_04230	GEOGNNEI_02063	BINKDPLB_02505	IPPPMGOG_01306	NCHKEDON_04484	PLMPIJHD_02105	LIBHOFBA_01913	MFAGDJPO_01972	AICMNGMC_01946	JAGDPAPJ_02105	JICHJFDH_03845	AHEHGMLM_04429	PABJNMJP_00749	MAPHOHON_04044	ONDKMJBG_01994	JDGDJJKN_04158	KLMHLHPE_04149	EGICBAEE_04044	LNEFCFII_04185	NILJAHBC_04202	KCIFOFJF_04116	CJCKLIFP_04208	IABBECJM_04222	LANDOHOG_04169	LOGCBOHO_04220	DKGFALGN_03760	PNFFMGCL_03747	BJCGHIIB_03665	NHHDDJBG_03611	LBLHELLM_03489	CGJPMKCI_03635	JOHJONHN_03933	CNEDDIJH_03559	JLJGJGIB_03481
group_3152		hypothetical protein	102	102	1	1	15308			Hypothetical protein with no hits to refseq/uniprot/clusters/cdd/tigrfams/pfam overlapping another protein with hits	716	899	897	DGJMBLJC_01687	HFDHOMNF_01980	ALEPGING_01928	GEOGNNEI_02097	BINKDPLB_02950	IPPPMGOG_01272	NCHKEDON_04450	PLMPIJHD_02139	LIBHOFBA_01947	MFAGDJPO_02006	AICMNGMC_01980	JAGDPAPJ_02139	JICHJFDH_03812	AHEHGMLM_02357	PABJNMJP_00715	MAPHOHON_04010	ONDKMJBG_02028	JDGDJJKN_04195	KLMHLHPE_04183	EGICBAEE_04078	LNEFCFII_04151	NILJAHBC_04168	KCIFOFJF_04082	CJCKLIFP_04174	IABBECJM_04256	LANDOHOG_04203	LOGCBOHO_04254	DKGFALGN_03794	PNFFMGCL_03781	BJCGHIIB_03631	NHHDDJBG_03645	LBLHELLM_03523	CGJPMKCI_03601	JOHJONHN_03899	CNEDDIJH_03525	JLJGJGIB_03515
rsmG		Ribosomal RNA small subunit methyltransferase G	102	102	1	1	15050				515	629	622	DGJMBLJC_01733	HFDHOMNF_02063	ALEPGING_00598	GEOGNNEI_02136	BINKDPLB_02111	IPPPMGOG_03729	NCHKEDON_02630	PLMPIJHD_02178	LIBHOFBA_01986	MFAGDJPO_03969	AICMNGMC_02105	JAGDPAPJ_02178	JICHJFDH_01962	AHEHGMLM_03084	PABJNMJP_03149	MAPHOHON_04123	ONDKMJBG_03875	JDGDJJKN_04378	KLMHLHPE_04255	EGICBAEE_04150	LNEFCFII_04262	NILJAHBC_04318	KCIFOFJF_04234	CJCKLIFP_04324	IABBECJM_04400	LANDOHOG_04314	LOGCBOHO_04366	DKGFALGN_04021	PNFFMGCL_03820	BJCGHIIB_03926	NHHDDJBG_03798	LBLHELLM_03595	CGJPMKCI_03747	JOHJONHN_03976	CNEDDIJH_03667	JLJGJGIB_03588
glmS		Glutamine--fructose-6-phosphate aminotransferase [isomerizing]	102	102	1	1	15037				1001	1829	1813	DGJMBLJC_01747	HFDHOMNF_02075	ALEPGING_00610	GEOGNNEI_02148	BINKDPLB_02123	IPPPMGOG_03741	NCHKEDON_02618	PLMPIJHD_02190	LIBHOFBA_01998	MFAGDJPO_03957	AICMNGMC_02117	JAGDPAPJ_02190	JICHJFDH_01974	AHEHGMLM_03096	PABJNMJP_03161	MAPHOHON_04111	ONDKMJBG_03887	JDGDJJKN_04390	KLMHLHPE_04243	EGICBAEE_04138	LNEFCFII_04250	NILJAHBC_04330	KCIFOFJF_04246	CJCKLIFP_04336	IABBECJM_04388	LANDOHOG_04326	LOGCBOHO_04378	DKGFALGN_04009	PNFFMGCL_03832	BJCGHIIB_03938	NHHDDJBG_03810	LBLHELLM_03583	CGJPMKCI_03759	JOHJONHN_03988	CNEDDIJH_03679	JLJGJGIB_03576
cfxP		Phosphoribulokinase, plasmid	102	102	1	1	14554				710	929	867	DGJMBLJC_01810	HFDHOMNF_03627	ALEPGING_03826	GEOGNNEI_03848	BINKDPLB_03585	IPPPMGOG_02242	NCHKEDON_01683	PLMPIJHD_01645	LIBHOFBA_01454	MFAGDJPO_01626	AICMNGMC_01504	JAGDPAPJ_01647	JICHJFDH_03417	AHEHGMLM_01980	PABJNMJP_02632	MAPHOHON_02906	ONDKMJBG_03510	JDGDJJKN_04451	KLMHLHPE_02707	EGICBAEE_03671	LNEFCFII_03668	NILJAHBC_03366	KCIFOFJF_03602	CJCKLIFP_03189	IABBECJM_03232	LANDOHOG_03230	LOGCBOHO_02916	DKGFALGN_03415	PNFFMGCL_02781	BJCGHIIB_02585	NHHDDJBG_02395	LBLHELLM_02369	CGJPMKCI_02383	JOHJONHN_03198	CNEDDIJH_03063	JLJGJGIB_01706
nudE		ADP compounds hydrolase NudE	102	102	1	1	14507				296	596	581	DGJMBLJC_01841	HFDHOMNF_03594	ALEPGING_01714	GEOGNNEI_03877	BINKDPLB_03614	IPPPMGOG_04605	NCHKEDON_03296	PLMPIJHD_01674	LIBHOFBA_01483	MFAGDJPO_01655	AICMNGMC_01533	JAGDPAPJ_01676	JICHJFDH_03387	AHEHGMLM_03485	PABJNMJP_04640	MAPHOHON_02935	ONDKMJBG_03539	JDGDJJKN_03483	KLMHLHPE_02678	EGICBAEE_03642	LNEFCFII_03639	NILJAHBC_03337	KCIFOFJF_03573	CJCKLIFP_03218	IABBECJM_03261	LANDOHOG_03259	LOGCBOHO_02945	DKGFALGN_03444	PNFFMGCL_02752	BJCGHIIB_02556	NHHDDJBG_02366	LBLHELLM_02398	CGJPMKCI_02354	JOHJONHN_03169	CNEDDIJH_03034	JLJGJGIB_01735
tsr_2		Methyl-accepting chemotaxis protein I	102	102	1	1	14380				1388	1643	1640	DGJMBLJC_01931	HFDHOMNF_01914	ALEPGING_01487	GEOGNNEI_03952	BINKDPLB_03689	IPPPMGOG_04530	NCHKEDON_03371	PLMPIJHD_01749	LIBHOFBA_01558	MFAGDJPO_01730	AICMNGMC_01608	JAGDPAPJ_01751	JICHJFDH_03312	AHEHGMLM_03410	PABJNMJP_04715	MAPHOHON_03010	ONDKMJBG_03614	JDGDJJKN_03402	KLMHLHPE_02603	EGICBAEE_03568	LNEFCFII_03565	NILJAHBC_03262	KCIFOFJF_03498	CJCKLIFP_03293	IABBECJM_03336	LANDOHOG_03334	LOGCBOHO_03020	DKGFALGN_03519	PNFFMGCL_02677	BJCGHIIB_02481	NHHDDJBG_02291	LBLHELLM_02473	CGJPMKCI_02279	JOHJONHN_03094	CNEDDIJH_02960	JLJGJGIB_01810
yvoA_2		HTH-type transcriptional repressor YvoA	102	102	1	1	14325			Hypothetical protein with no hits to refseq/uniprot/clusters/cdd/tigrfams/pfam overlapping another protein with hits	350	719	715	DGJMBLJC_01962	HFDHOMNF_01887	ALEPGING_03138	GEOGNNEI_03977	BINKDPLB_03714	IPPPMGOG_04505	NCHKEDON_03394	PLMPIJHD_02959	LIBHOFBA_02771	MFAGDJPO_02740	AICMNGMC_03024	JAGDPAPJ_02959	JICHJFDH_03287	AHEHGMLM_02745	PABJNMJP_02470	MAPHOHON_03036	ONDKMJBG_02074	JDGDJJKN_03376	KLMHLHPE_02578	EGICBAEE_04377	LNEFCFII_04415	NILJAHBC_03236	KCIFOFJF_04354	CJCKLIFP_03319	IABBECJM_03362	LANDOHOG_03360	LOGCBOHO_03046	DKGFALGN_04229	PNFFMGCL_02652	BJCGHIIB_02456	NHHDDJBG_02266	LBLHELLM_02498	CGJPMKCI_02254	JOHJONHN_04286	CNEDDIJH_04179	JLJGJGIB_01835
yhjE		Inner membrane metabolite transport protein YhjE	102	102	1	1	14309				446	1337	1313	DGJMBLJC_01969	HFDHOMNF_01880	ALEPGING_01296	GEOGNNEI_03984	BINKDPLB_03721	IPPPMGOG_04498	NCHKEDON_03401	PLMPIJHD_02952	LIBHOFBA_02764	MFAGDJPO_02733	AICMNGMC_03017	JAGDPAPJ_02952	JICHJFDH_03280	AHEHGMLM_02738	PABJNMJP_02477	MAPHOHON_03043	ONDKMJBG_02067	JDGDJJKN_03369	KLMHLHPE_02571	EGICBAEE_04370	LNEFCFII_04408	NILJAHBC_03229	KCIFOFJF_04361	CJCKLIFP_03326	IABBECJM_03369	LANDOHOG_03367	LOGCBOHO_03053	DKGFALGN_04222	PNFFMGCL_02645	BJCGHIIB_02449	NHHDDJBG_02259	LBLHELLM_02505	CGJPMKCI_02247	JOHJONHN_04293	CNEDDIJH_04172	JLJGJGIB_01842
dppA		Periplasmic dipeptide transport protein	102	102	1	1	14272				1490	1679	1607	DGJMBLJC_01995	HFDHOMNF_03949	ALEPGING_04089	GEOGNNEI_03637	BINKDPLB_03448	IPPPMGOG_02840	NCHKEDON_02388	PLMPIJHD_03917	LIBHOFBA_04002	MFAGDJPO_03727	AICMNGMC_02343	JAGDPAPJ_03916	JICHJFDH_03734	AHEHGMLM_02302	PABJNMJP_03691	MAPHOHON_02881	ONDKMJBG_04008	JDGDJJKN_03347	KLMHLHPE_02548	EGICBAEE_03053	LNEFCFII_02918	NILJAHBC_03207	KCIFOFJF_02841	CJCKLIFP_03164	IABBECJM_03207	LANDOHOG_03205	LOGCBOHO_02891	DKGFALGN_02562	PNFFMGCL_02623	BJCGHIIB_02427	NHHDDJBG_02237	LBLHELLM_02165	CGJPMKCI_04313	JOHJONHN_02613	CNEDDIJH_02334	JLJGJGIB_02544
group_3198		hypothetical protein	102	102	1	1	14120				935	962	961	DGJMBLJC_02073	HFDHOMNF_04041	ALEPGING_02852	GEOGNNEI_03719	BINKDPLB_04018	IPPPMGOG_02758	NCHKEDON_02470	PLMPIJHD_03999	LIBHOFBA_04084	MFAGDJPO_03809	AICMNGMC_02425	JAGDPAPJ_03999	JICHJFDH_01037	AHEHGMLM_01459	PABJNMJP_03609	MAPHOHON_02799	ONDKMJBG_04090	JDGDJJKN_03272	KLMHLHPE_02465	EGICBAEE_03135	LNEFCFII_02836	NILJAHBC_03125	KCIFOFJF_02923	CJCKLIFP_03082	IABBECJM_03125	LANDOHOG_03123	LOGCBOHO_02809	DKGFALGN_02644	PNFFMGCL_02541	BJCGHIIB_02345	NHHDDJBG_02155	LBLHELLM_02247	CGJPMKCI_02860	JOHJONHN_02531	CNEDDIJH_02252	JLJGJGIB_02462
coaBC		Coenzyme A biosynthesis bifunctional protein CoaBC	102	102	1	1	14086				956	1223	1220	DGJMBLJC_02098	HFDHOMNF_04066	ALEPGING_03610	GEOGNNEI_03744	BINKDPLB_04043	IPPPMGOG_02733	NCHKEDON_02495	PLMPIJHD_04024	LIBHOFBA_04109	MFAGDJPO_03834	AICMNGMC_02450	JAGDPAPJ_04024	JICHJFDH_01012	AHEHGMLM_01434	PABJNMJP_03584	MAPHOHON_02774	ONDKMJBG_04115	JDGDJJKN_03248	KLMHLHPE_02440	EGICBAEE_03160	LNEFCFII_02811	NILJAHBC_03100	KCIFOFJF_02948	CJCKLIFP_03057	IABBECJM_03100	LANDOHOG_03098	LOGCBOHO_02784	DKGFALGN_02669	PNFFMGCL_02516	BJCGHIIB_02320	NHHDDJBG_02130	LBLHELLM_02272	CGJPMKCI_02835	JOHJONHN_02506	CNEDDIJH_02227	JLJGJGIB_02437
cysT		Sulfate transport system permease protein CysT	102	102	1	1	10398				428	857	829	DGJMBLJC_02181	HFDHOMNF_03063	ALEPGING_00113	GEOGNNEI_02712	BINKDPLB_01840	IPPPMGOG_00902	NCHKEDON_00880	PLMPIJHD_02680	LIBHOFBA_02492	MFAGDJPO_01300	AICMNGMC_02800	JAGDPAPJ_02735	JICHJFDH_02362	AHEHGMLM_02831	PABJNMJP_03982	MAPHOHON_02432	ONDKMJBG_03113	JDGDJJKN_03002	KLMHLHPE_02204	EGICBAEE_01331	LNEFCFII_01934	NILJAHBC_02446	KCIFOFJF_02336	CJCKLIFP_01441	IABBECJM_01803	LANDOHOG_01907	LOGCBOHO_02208	DKGFALGN_02398	PNFFMGCL_01840	BJCGHIIB_01874	NHHDDJBG_01680	LBLHELLM_01051	CGJPMKCI_01997	JOHJONHN_02205	CNEDDIJH_01473	JLJGJGIB_01465
group_3215		hypothetical protein	102	102	1	1	10368			Hypothetical protein with no hits to refseq/uniprot/clusters/cdd/tigrfams/pfam overlapping another protein with hits	218	263	220	DGJMBLJC_02199	HFDHOMNF_03080	ALEPGING_02142	GEOGNNEI_02695	BINKDPLB_01823	IPPPMGOG_00919	NCHKEDON_00863	PLMPIJHD_02663	LIBHOFBA_02475	MFAGDJPO_01283	AICMNGMC_02783	JAGDPAPJ_02718	JICHJFDH_02379	AHEHGMLM_02848	PABJNMJP_03965	MAPHOHON_02449	ONDKMJBG_03096	JDGDJJKN_02985	KLMHLHPE_02187	EGICBAEE_01314	LNEFCFII_01917	NILJAHBC_02463	KCIFOFJF_02353	CJCKLIFP_01424	IABBECJM_01820	LANDOHOG_01890	LOGCBOHO_02225	DKGFALGN_02381	PNFFMGCL_01857	BJCGHIIB_01857	NHHDDJBG_01663	LBLHELLM_01068	CGJPMKCI_02014	JOHJONHN_02222	CNEDDIJH_01456	JLJGJGIB_01482
fadI		3-ketoacyl-CoA thiolase FadI	102	102	1	1	10127				971	1310	1306	DGJMBLJC_02245	HFDHOMNF_04563	ALEPGING_03776	GEOGNNEI_02575	BINKDPLB_00942	IPPPMGOG_00668	NCHKEDON_00752	PLMPIJHD_02552	LIBHOFBA_02363	MFAGDJPO_01172	AICMNGMC_02672	JAGDPAPJ_02607	JICHJFDH_03216	AHEHGMLM_01267	PABJNMJP_03854	MAPHOHON_02560	ONDKMJBG_02984	JDGDJJKN_02872	KLMHLHPE_02960	EGICBAEE_01204	LNEFCFII_01807	NILJAHBC_02573	KCIFOFJF_02463	CJCKLIFP_01314	IABBECJM_01930	LANDOHOG_01780	LOGCBOHO_02335	DKGFALGN_03226	PNFFMGCL_01897	BJCGHIIB_03104	NHHDDJBG_02857	LBLHELLM_02966	CGJPMKCI_03079	JOHJONHN_01912	CNEDDIJH_02440	JLJGJGIB_03140
gntR_1		HTH-type transcriptional regulator GntR	102	102	1	1	10045				797	1019	1014	DGJMBLJC_02293	HFDHOMNF_04608	ALEPGING_02244	GEOGNNEI_02531	BINKDPLB_00898	IPPPMGOG_00712	NCHKEDON_00707	PLMPIJHD_02507	LIBHOFBA_02318	MFAGDJPO_01127	AICMNGMC_02627	JAGDPAPJ_02562	JICHJFDH_03172	AHEHGMLM_01223	PABJNMJP_03810	MAPHOHON_02604	ONDKMJBG_02940	JDGDJJKN_02830	KLMHLHPE_03004	EGICBAEE_01159	LNEFCFII_01762	NILJAHBC_02617	KCIFOFJF_02507	CJCKLIFP_01270	IABBECJM_01974	LANDOHOG_01736	LOGCBOHO_02379	DKGFALGN_03182	PNFFMGCL_01941	BJCGHIIB_03148	NHHDDJBG_02813	LBLHELLM_02922	CGJPMKCI_03123	JOHJONHN_01956	CNEDDIJH_02484	JLJGJGIB_03184
hxpA		Hexitol phosphatase A	102	102	1	1	10031				647	698	659	DGJMBLJC_02306	HFDHOMNF_04619	ALEPGING_00703	GEOGNNEI_02520	BINKDPLB_00887	IPPPMGOG_00723	NCHKEDON_00696	PLMPIJHD_02496	LIBHOFBA_02307	MFAGDJPO_01116	AICMNGMC_02616	JAGDPAPJ_02551	JICHJFDH_03161	AHEHGMLM_01212	PABJNMJP_03799	MAPHOHON_02615	ONDKMJBG_02929	JDGDJJKN_02819	KLMHLHPE_03015	EGICBAEE_01148	LNEFCFII_01751	NILJAHBC_02628	KCIFOFJF_02518	CJCKLIFP_01259	IABBECJM_01985	LANDOHOG_01725	LOGCBOHO_02390	DKGFALGN_03171	PNFFMGCL_01952	BJCGHIIB_03159	NHHDDJBG_02802	LBLHELLM_02911	CGJPMKCI_03134	JOHJONHN_01967	CNEDDIJH_02495	JLJGJGIB_03195
pmrD		Signal transduction protein PmrD	102	102	1	1	9986				233	257	256	DGJMBLJC_02343	HFDHOMNF_04653	ALEPGING_00657	GEOGNNEI_02490	BINKDPLB_00857	IPPPMGOG_00753	NCHKEDON_00666	PLMPIJHD_02466	LIBHOFBA_02277	MFAGDJPO_01086	AICMNGMC_02586	JAGDPAPJ_02521	JICHJFDH_03131	AHEHGMLM_01181	PABJNMJP_03768	MAPHOHON_02646	ONDKMJBG_02898	JDGDJJKN_02789	KLMHLHPE_03045	EGICBAEE_01118	LNEFCFII_01721	NILJAHBC_02658	KCIFOFJF_02548	CJCKLIFP_01229	IABBECJM_02015	LANDOHOG_01695	LOGCBOHO_02420	DKGFALGN_03141	PNFFMGCL_01982	BJCGHIIB_03189	NHHDDJBG_02772	LBLHELLM_02881	CGJPMKCI_03164	JOHJONHN_01997	CNEDDIJH_02525	JLJGJGIB_03225
gltC_1		HTH-type transcriptional regulator GltC	102	102	1	1	9950				539	878	871	DGJMBLJC_02366	HFDHOMNF_04676	ALEPGING_00689	GEOGNNEI_02467	BINKDPLB_00834	IPPPMGOG_00776	NCHKEDON_00643	PLMPIJHD_02443	LIBHOFBA_02254	MFAGDJPO_01063	AICMNGMC_02563	JAGDPAPJ_02498	JICHJFDH_03107	AHEHGMLM_01158	PABJNMJP_03745	MAPHOHON_02669	ONDKMJBG_02875	JDGDJJKN_02766	KLMHLHPE_03068	EGICBAEE_01095	LNEFCFII_01698	NILJAHBC_02681	KCIFOFJF_02571	CJCKLIFP_01206	IABBECJM_02038	LANDOHOG_01672	LOGCBOHO_02443	DKGFALGN_03118	PNFFMGCL_02005	BJCGHIIB_03212	NHHDDJBG_02749	LBLHELLM_02858	CGJPMKCI_03187	JOHJONHN_02020	CNEDDIJH_04266	JLJGJGIB_03953
ybhN		Inner membrane protein YbhN	102	102	1	1	5191				371	962	950	DGJMBLJC_02411	HFDHOMNF_02203	ALEPGING_02495	GEOGNNEI_02289	BINKDPLB_02464	IPPPMGOG_02148	NCHKEDON_01980	PLMPIJHD_02880	LIBHOFBA_02692	MFAGDJPO_02310	AICMNGMC_01804	JAGDPAPJ_02451	JICHJFDH_01812	AHEHGMLM_04364	PABJNMJP_03086	MAPHOHON_04445	ONDKMJBG_02339	JDGDJJKN_00657	KLMHLHPE_04282	EGICBAEE_04343	LNEFCFII_04350	NILJAHBC_04409	KCIFOFJF_04294	CJCKLIFP_04415	IABBECJM_04458	LANDOHOG_04405	LOGCBOHO_04429	DKGFALGN_04349	PNFFMGCL_03945	BJCGHIIB_04118	NHHDDJBG_03957	LBLHELLM_03754	CGJPMKCI_03939	JOHJONHN_04226	CNEDDIJH_04145	JLJGJGIB_03803
moaC		Cyclic pyranopterin monophosphate synthase	102	102	1	1	5179				443	485	444	DGJMBLJC_02418	HFDHOMNF_02210	ALEPGING_02488	GEOGNNEI_02282	BINKDPLB_02457	IPPPMGOG_02155	NCHKEDON_01987	PLMPIJHD_02873	LIBHOFBA_02685	MFAGDJPO_02303	AICMNGMC_01797	JAGDPAPJ_02444	JICHJFDH_01805	AHEHGMLM_04371	PABJNMJP_03093	MAPHOHON_04438	ONDKMJBG_02346	JDGDJJKN_00664	KLMHLHPE_04289	EGICBAEE_04336	LNEFCFII_04357	NILJAHBC_04402	KCIFOFJF_04301	CJCKLIFP_04408	IABBECJM_04451	LANDOHOG_04398	LOGCBOHO_04436	DKGFALGN_04356	PNFFMGCL_03952	BJCGHIIB_04125	NHHDDJBG_03950	LBLHELLM_03761	CGJPMKCI_03946	JOHJONHN_04233	CNEDDIJH_04138	JLJGJGIB_03810
acrZ		Multidrug efflux pump accessory protein AcrZ	102	102	1	1	5138				149	149	149	DGJMBLJC_02444	HFDHOMNF_02234	ALEPGING_02906	GEOGNNEI_02259	BINKDPLB_02434	IPPPMGOG_00595	NCHKEDON_02010	PLMPIJHD_02850	LIBHOFBA_02662	MFAGDJPO_02280	AICMNGMC_01774	JAGDPAPJ_02421	JICHJFDH_01782	AHEHGMLM_04394	PABJNMJP_03116	MAPHOHON_04415	ONDKMJBG_02369	JDGDJJKN_00687	KLMHLHPE_04312	EGICBAEE_04313	LNEFCFII_04380	NILJAHBC_04379	KCIFOFJF_04324	CJCKLIFP_04385	IABBECJM_04428	LANDOHOG_04375	LOGCBOHO_04459	DKGFALGN_04584	PNFFMGCL_03975	BJCGHIIB_04148	NHHDDJBG_03927	LBLHELLM_03784	CGJPMKCI_03969	JOHJONHN_04256	CNEDDIJH_04115	JLJGJGIB_03833
galM		Aldose 1-epimerase	102	102	1	1	5130				533	1040	1035	DGJMBLJC_02452	HFDHOMNF_02241	ALEPGING_02913	GEOGNNEI_02252	BINKDPLB_02427	IPPPMGOG_00588	NCHKEDON_02017	PLMPIJHD_02843	LIBHOFBA_02655	MFAGDJPO_02273	AICMNGMC_01767	JAGDPAPJ_02414	JICHJFDH_01775	AHEHGMLM_04401	PABJNMJP_03123	MAPHOHON_04408	ONDKMJBG_02376	JDGDJJKN_00694	KLMHLHPE_04319	EGICBAEE_04306	LNEFCFII_04387	NILJAHBC_04372	KCIFOFJF_04331	CJCKLIFP_04378	IABBECJM_04421	LANDOHOG_04368	LOGCBOHO_04466	DKGFALGN_04591	PNFFMGCL_03982	BJCGHIIB_04155	NHHDDJBG_03920	LBLHELLM_03791	CGJPMKCI_03976	JOHJONHN_04263	CNEDDIJH_04108	JLJGJGIB_03840
group_3251		hypothetical protein	102	102	1	1	855			Hypothetical protein with no hits to refseq/uniprot/clusters/cdd/tigrfams/pfam overlapping another protein with hits	500	722	719	DGJMBLJC_02467	HFDHOMNF_04522	ALEPGING_03863	GEOGNNEI_04197	BINKDPLB_01337	IPPPMGOG_00272	NCHKEDON_03685	PLMPIJHD_04307	LIBHOFBA_04390	MFAGDJPO_04182	AICMNGMC_04115	JAGDPAPJ_04300	JICHJFDH_02471	AHEHGMLM_04151	PABJNMJP_02044	MAPHOHON_03220	ONDKMJBG_02644	JDGDJJKN_03507	KLMHLHPE_03111	EGICBAEE_02598	LNEFCFII_03121	NILJAHBC_03013	KCIFOFJF_02311	CJCKLIFP_02439	IABBECJM_02481	LANDOHOG_02775	LOGCBOHO_03418	DKGFALGN_02040	PNFFMGCL_04325	BJCGHIIB_04343	NHHDDJBG_04331	LBLHELLM_04245	CGJPMKCI_04294	JOHJONHN_02781	CNEDDIJH_02013	JLJGJGIB_02377
panF		Sodium/pantothenate symporter	102	102	1	1	13535				779	1451	1444	DGJMBLJC_02583	HFDHOMNF_02730	ALEPGING_03040	GEOGNNEI_02409	BINKDPLB_02841	IPPPMGOG_01235	NCHKEDON_03657	PLMPIJHD_03037	LIBHOFBA_02849	MFAGDJPO_02818	AICMNGMC_01731	JAGDPAPJ_03092	JICHJFDH_02101	AHEHGMLM_04020	PABJNMJP_02926	MAPHOHON_04538	ONDKMJBG_03848	JDGDJJKN_00998	KLMHLHPE_04388	EGICBAEE_04455	LNEFCFII_04493	NILJAHBC_04484	KCIFOFJF_04484	CJCKLIFP_04482	IABBECJM_04500	LANDOHOG_04480	LOGCBOHO_04483	DKGFALGN_04307	PNFFMGCL_04181	BJCGHIIB_04219	NHHDDJBG_04180	LBLHELLM_04148	CGJPMKCI_04086	JOHJONHN_04433	CNEDDIJH_04419	JLJGJGIB_04010
ydgC		Inner membrane protein YdgC	102	102	1	1	6799				326	374	335	DGJMBLJC_02639	HFDHOMNF_00465	ALEPGING_02110	GEOGNNEI_00752	BINKDPLB_02638	IPPPMGOG_01763	NCHKEDON_00387	PLMPIJHD_00609	LIBHOFBA_00421	MFAGDJPO_00611	AICMNGMC_00611	JAGDPAPJ_00755	JICHJFDH_04401	AHEHGMLM_00376	PABJNMJP_01270	MAPHOHON_00754	ONDKMJBG_01213	JDGDJJKN_00101	KLMHLHPE_00494	EGICBAEE_00356	LNEFCFII_00422	NILJAHBC_00423	KCIFOFJF_00755	CJCKLIFP_00423	IABBECJM_00755	LANDOHOG_00754	LOGCBOHO_00754	DKGFALGN_00422	PNFFMGCL_00752	BJCGHIIB_00229	NHHDDJBG_00472	LBLHELLM_00873	CGJPMKCI_00421	JOHJONHN_00530	CNEDDIJH_00274	JLJGJGIB_02044
rstA		Transcriptional regulatory protein RstA	102	102	1	1	6797				731	734	731	DGJMBLJC_02640	HFDHOMNF_00464	ALEPGING_02111	GEOGNNEI_00753	BINKDPLB_02637	IPPPMGOG_01764	NCHKEDON_00386	PLMPIJHD_00610	LIBHOFBA_00422	MFAGDJPO_00612	AICMNGMC_00612	JAGDPAPJ_00756	JICHJFDH_04400	AHEHGMLM_00375	PABJNMJP_01271	MAPHOHON_00755	ONDKMJBG_01212	JDGDJJKN_00102	KLMHLHPE_00495	EGICBAEE_00357	LNEFCFII_00421	NILJAHBC_00422	KCIFOFJF_00756	CJCKLIFP_00422	IABBECJM_00756	LANDOHOG_00755	LOGCBOHO_00755	DKGFALGN_00421	PNFFMGCL_00753	BJCGHIIB_00230	NHHDDJBG_00473	LBLHELLM_00872	CGJPMKCI_00420	JOHJONHN_00531	CNEDDIJH_00273	JLJGJGIB_02045
group_3296		putative NTE family protein	102	102	1	1	7438				491	905	891	DGJMBLJC_02698	HFDHOMNF_00767	ALEPGING_04465	GEOGNNEI_00468	BINKDPLB_01045	IPPPMGOG_02296	NCHKEDON_03838	PLMPIJHD_00326	LIBHOFBA_00135	MFAGDJPO_00326	AICMNGMC_00326	JAGDPAPJ_00469	JICHJFDH_00459	AHEHGMLM_00662	PABJNMJP_00985	MAPHOHON_00469	ONDKMJBG_01498	JDGDJJKN_02036	KLMHLHPE_00210	EGICBAEE_00071	LNEFCFII_00707	NILJAHBC_00708	KCIFOFJF_00470	CJCKLIFP_00708	IABBECJM_00470	LANDOHOG_00469	LOGCBOHO_00469	DKGFALGN_00707	PNFFMGCL_00468	BJCGHIIB_03856	NHHDDJBG_01892	LBLHELLM_02104	CGJPMKCI_00718	JOHJONHN_00244	CNEDDIJH_01010	JLJGJGIB_00263
purM		Phosphoribosylformylglycinamidine cyclo-ligase	102	102	1	1	10487				401	1157	1112	DGJMBLJC_02710	HFDHOMNF_03003	ALEPGING_01116	GEOGNNEI_02768	BINKDPLB_01896	IPPPMGOG_00846	NCHKEDON_00936	PLMPIJHD_02736	LIBHOFBA_02548	MFAGDJPO_01356	AICMNGMC_02856	JAGDPAPJ_02791	JICHJFDH_03563	AHEHGMLM_02774	PABJNMJP_04039	MAPHOHON_02376	ONDKMJBG_03169	JDGDJJKN_03059	KLMHLHPE_02260	EGICBAEE_01387	LNEFCFII_01990	NILJAHBC_02390	KCIFOFJF_03316	CJCKLIFP_01497	IABBECJM_01747	LANDOHOG_01963	LOGCBOHO_02152	DKGFALGN_02454	PNFFMGCL_01784	BJCGHIIB_01930	NHHDDJBG_01736	LBLHELLM_00995	CGJPMKCI_01941	JOHJONHN_02149	CNEDDIJH_01529	JLJGJGIB_01409
nudC		NADH pyrophosphatase	102	102	1	1	15687				317	773	765	DGJMBLJC_02758	HFDHOMNF_02764	ALEPGING_01158	GEOGNNEI_02880	BINKDPLB_02984	IPPPMGOG_01355	NCHKEDON_02761	PLMPIJHD_03127	LIBHOFBA_02890	MFAGDJPO_02904	AICMNGMC_03101	JAGDPAPJ_03133	JICHJFDH_03596	AHEHGMLM_03708	PABJNMJP_02705	MAPHOHON_04568	ONDKMJBG_00066	JDGDJJKN_04426	KLMHLHPE_04429	EGICBAEE_04496	LNEFCFII_04542	NILJAHBC_04525	KCIFOFJF_04525	CJCKLIFP_04523	IABBECJM_04522	LANDOHOG_04529	LOGCBOHO_04532	DKGFALGN_04430	PNFFMGCL_04253	BJCGHIIB_04261	NHHDDJBG_04260	LBLHELLM_04174	CGJPMKCI_04127	JOHJONHN_04493	CNEDDIJH_04479	JLJGJGIB_04362
ycaD		putative MFS-type transporter YcaD	102	102	1	1	5428				743	1148	1141	DGJMBLJC_02818	HFDHOMNF_01306	ALEPGING_03065	GEOGNNEI_04462	BINKDPLB_03099	IPPPMGOG_00831	NCHKEDON_03067	PLMPIJHD_04573	LIBHOFBA_04656	MFAGDJPO_04592	AICMNGMC_04381	JAGDPAPJ_04566	JICHJFDH_00881	AHEHGMLM_02266	PABJNMJP_01850	MAPHOHON_03410	ONDKMJBG_04223	JDGDJJKN_00551	KLMHLHPE_03302	EGICBAEE_03455	LNEFCFII_03312	NILJAHBC_03676	KCIFOFJF_03461	CJCKLIFP_03785	IABBECJM_03828	LANDOHOG_03599	LOGCBOHO_03683	DKGFALGN_03367	PNFFMGCL_04213	BJCGHIIB_03732	NHHDDJBG_04240	LBLHELLM_04088	CGJPMKCI_03692	JOHJONHN_04473	CNEDDIJH_04459	JLJGJGIB_02655
group_3310		hypothetical protein	102	102	1	1	5449				392	692	689	DGJMBLJC_02826	HFDHOMNF_01297	ALEPGING_03073	GEOGNNEI_04470	BINKDPLB_03005	IPPPMGOG_00823	NCHKEDON_03059	PLMPIJHD_04581	LIBHOFBA_04664	MFAGDJPO_04600	AICMNGMC_04389	JAGDPAPJ_04574	JICHJFDH_00889	AHEHGMLM_02274	PABJNMJP_01858	MAPHOHON_03402	ONDKMJBG_04215	JDGDJJKN_00544	KLMHLHPE_03294	EGICBAEE_03447	LNEFCFII_03304	NILJAHBC_03684	KCIFOFJF_03469	CJCKLIFP_03793	IABBECJM_03836	LANDOHOG_03591	LOGCBOHO_03691	DKGFALGN_03375	PNFFMGCL_04221	BJCGHIIB_03740	NHHDDJBG_04232	LBLHELLM_04096	CGJPMKCI_03684	JOHJONHN_04465	CNEDDIJH_04451	JLJGJGIB_02663
fliI		Flagellum-specific ATP synthase	102	102	1	1	9092				245	1370	1348	DGJMBLJC_03027	HFDHOMNF_00990	ALEPGING_04035	GEOGNNEI_00253	BINKDPLB_03309	IPPPMGOG_02510	NCHKEDON_04052	PLMPIJHD_00111	LIBHOFBA_03502	MFAGDJPO_00111	AICMNGMC_00111	JAGDPAPJ_00254	JICHJFDH_02253	AHEHGMLM_00877	PABJNMJP_03225	MAPHOHON_00254	ONDKMJBG_01712	JDGDJJKN_01824	KLMHLHPE_01889	EGICBAEE_02150	LNEFCFII_00921	NILJAHBC_00923	KCIFOFJF_00254	CJCKLIFP_00923	IABBECJM_00254	LANDOHOG_00253	LOGCBOHO_00253	DKGFALGN_00921	PNFFMGCL_00253	BJCGHIIB_01400	NHHDDJBG_01016	LBLHELLM_03348	CGJPMKCI_01390	JOHJONHN_00029	CNEDDIJH_01223	JLJGJGIB_00477
dcyD		D-cysteine desulfhydrase	102	102	1	1	9042				524	986	981	DGJMBLJC_03048	HFDHOMNF_00970	ALEPGING_00837	GEOGNNEI_00271	BINKDPLB_03291	IPPPMGOG_02492	NCHKEDON_04034	PLMPIJHD_00129	LIBHOFBA_03484	MFAGDJPO_00129	AICMNGMC_00129	JAGDPAPJ_00272	JICHJFDH_02271	AHEHGMLM_00859	PABJNMJP_00788	MAPHOHON_00272	ONDKMJBG_01694	JDGDJJKN_01842	KLMHLHPE_01871	EGICBAEE_02168	LNEFCFII_00903	NILJAHBC_00905	KCIFOFJF_00272	CJCKLIFP_00905	IABBECJM_00272	LANDOHOG_00271	LOGCBOHO_00271	DKGFALGN_00903	PNFFMGCL_00271	BJCGHIIB_01382	NHHDDJBG_03674	LBLHELLM_03852	CGJPMKCI_01372	JOHJONHN_00047	CNEDDIJH_01205	JLJGJGIB_00459
aspS		Aspartate--tRNA ligase	102	102	1	1	8960				347	1772	1753	DGJMBLJC_03107	HFDHOMNF_00919	ALEPGING_04279	GEOGNNEI_00320	BINKDPLB_03242	IPPPMGOG_02443	NCHKEDON_03985	PLMPIJHD_00178	LIBHOFBA_03435	MFAGDJPO_00178	AICMNGMC_00178	JAGDPAPJ_00321	JICHJFDH_00313	AHEHGMLM_00810	PABJNMJP_00837	MAPHOHON_00321	ONDKMJBG_01645	JDGDJJKN_01892	KLMHLHPE_00062	EGICBAEE_02217	LNEFCFII_00854	NILJAHBC_00856	KCIFOFJF_00321	CJCKLIFP_00856	IABBECJM_00321	LANDOHOG_00320	LOGCBOHO_00320	DKGFALGN_00854	PNFFMGCL_00320	BJCGHIIB_01333	NHHDDJBG_02039	LBLHELLM_01956	CGJPMKCI_00865	JOHJONHN_00096	CNEDDIJH_01156	JLJGJGIB_00410
yebV		putative protein YebV	102	102	1	1	7600				122	239	237	DGJMBLJC_03158	HFDHOMNF_00867	ALEPGING_00174	GEOGNNEI_00371	BINKDPLB_03192	IPPPMGOG_02392	NCHKEDON_03934	PLMPIJHD_00229	LIBHOFBA_00038	MFAGDJPO_00229	AICMNGMC_00229	JAGDPAPJ_00372	JICHJFDH_00363	AHEHGMLM_00758	PABJNMJP_00888	MAPHOHON_00372	ONDKMJBG_01594	JDGDJJKN_01940	KLMHLHPE_00113	EGICBAEE_02268	LNEFCFII_00803	NILJAHBC_00805	KCIFOFJF_00372	CJCKLIFP_00805	IABBECJM_00372	LANDOHOG_00371	LOGCBOHO_00371	DKGFALGN_00803	PNFFMGCL_00371	BJCGHIIB_01282	NHHDDJBG_01988	LBLHELLM_02007	CGJPMKCI_00814	JOHJONHN_00147	CNEDDIJH_01106	JLJGJGIB_00359
mazG		Nucleoside triphosphate pyrophosphohydrolase	102	102	1	1	1936				791	800	799	DGJMBLJC_03249	HFDHOMNF_03939	ALEPGING_00759	GEOGNNEI_01424	BINKDPLB_00185	IPPPMGOG_03377	NCHKEDON_01700	PLMPIJHD_01218	LIBHOFBA_01028	MFAGDJPO_03196	AICMNGMC_01219	JAGDPAPJ_01362	JICHJFDH_03261	AHEHGMLM_04006	PABJNMJP_00266	MAPHOHON_02137	ONDKMJBG_00719	JDGDJJKN_01463	KLMHLHPE_01182	EGICBAEE_00838	LNEFCFII_01403	NILJAHBC_02047	KCIFOFJF_01824	CJCKLIFP_02190	IABBECJM_01405	LANDOHOG_01416	LOGCBOHO_01416	DKGFALGN_01441	PNFFMGCL_01498	BJCGHIIB_00976	NHHDDJBG_00185	LBLHELLM_00186	CGJPMKCI_01138	JOHJONHN_00892	CNEDDIJH_00740	JLJGJGIB_00690
queF		NADPH-dependent 7-cyano-7-deazaguanine reductase	102	102	1	1	1902				518	848	844	DGJMBLJC_03301	HFDHOMNF_03922	ALEPGING_02751	GEOGNNEI_01439	BINKDPLB_00200	IPPPMGOG_03362	NCHKEDON_01715	PLMPIJHD_01233	LIBHOFBA_01043	MFAGDJPO_03211	AICMNGMC_01234	JAGDPAPJ_01377	JICHJFDH_03246	AHEHGMLM_03991	PABJNMJP_00251	MAPHOHON_02122	ONDKMJBG_00734	JDGDJJKN_01442	KLMHLHPE_01167	EGICBAEE_00823	LNEFCFII_01418	NILJAHBC_02062	KCIFOFJF_01809	CJCKLIFP_02205	IABBECJM_01420	LANDOHOG_01401	LOGCBOHO_01401	DKGFALGN_01426	PNFFMGCL_01483	BJCGHIIB_00961	NHHDDJBG_00200	LBLHELLM_00201	CGJPMKCI_01123	JOHJONHN_00877	CNEDDIJH_00755	JLJGJGIB_00705
tcdA		tRNA threonylcarbamoyladenosine dehydratase	102	102	1	1	1879				542	806	803	DGJMBLJC_03323	HFDHOMNF_03900	ALEPGING_03282	GEOGNNEI_01459	BINKDPLB_00220	IPPPMGOG_03342	NCHKEDON_01735	PLMPIJHD_01253	LIBHOFBA_01063	MFAGDJPO_03231	AICMNGMC_01254	JAGDPAPJ_01397	JICHJFDH_03226	AHEHGMLM_03971	PABJNMJP_00232	MAPHOHON_02103	ONDKMJBG_00754	JDGDJJKN_01423	KLMHLHPE_01147	EGICBAEE_00804	LNEFCFII_01438	NILJAHBC_02082	KCIFOFJF_01789	CJCKLIFP_02225	IABBECJM_01439	LANDOHOG_01382	LOGCBOHO_01382	DKGFALGN_01406	PNFFMGCL_01464	BJCGHIIB_00941	NHHDDJBG_00220	LBLHELLM_00221	CGJPMKCI_01103	JOHJONHN_00857	CNEDDIJH_00775	JLJGJGIB_00725
pepP		Xaa-Pro aminopeptidase	102	102	1	1	1728				191	1316	1301	DGJMBLJC_03403	HFDHOMNF_03809	ALEPGING_01596	GEOGNNEI_01541	BINKDPLB_00302	IPPPMGOG_04010	NCHKEDON_01817	PLMPIJHD_01335	LIBHOFBA_01145	MFAGDJPO_03313	AICMNGMC_01336	JAGDPAPJ_01479	JICHJFDH_01867	AHEHGMLM_03889	PABJNMJP_00150	MAPHOHON_02021	ONDKMJBG_02698	JDGDJJKN_01353	KLMHLHPE_01065	EGICBAEE_00722	LNEFCFII_01520	NILJAHBC_02164	KCIFOFJF_01707	CJCKLIFP_02307	IABBECJM_01521	LANDOHOG_01300	LOGCBOHO_01300	DKGFALGN_01324	PNFFMGCL_01382	BJCGHIIB_00859	NHHDDJBG_00302	LBLHELLM_00303	CGJPMKCI_01021	JOHJONHN_00775	CNEDDIJH_00857	JLJGJGIB_00807
metC		Cystathionine beta-lyase MetC	102	102	1	1	13078				641	1187	1181	DGJMBLJC_03524	HFDHOMNF_03685	ALEPGING_00722	GEOGNNEI_01656	BINKDPLB_02329	IPPPMGOG_04125	NCHKEDON_01932	PLMPIJHD_01450	LIBHOFBA_01260	MFAGDJPO_03428	AICMNGMC_01451	JAGDPAPJ_01594	JICHJFDH_03009	AHEHGMLM_04296	PABJNMJP_00035	MAPHOHON_01906	ONDKMJBG_02812	JDGDJJKN_01253	KLMHLHPE_00950	EGICBAEE_00607	LNEFCFII_01635	NILJAHBC_02280	KCIFOFJF_01591	CJCKLIFP_02423	IABBECJM_01637	LANDOHOG_01184	LOGCBOHO_01184	DKGFALGN_01209	PNFFMGCL_01267	BJCGHIIB_00744	NHHDDJBG_00417	LBLHELLM_00418	CGJPMKCI_00906	JOHJONHN_00660	CNEDDIJH_00972	JLJGJGIB_04069
dkgA		2,5-diketo-D-gluconic acid reductase A	102	102	1	1	13082				524	827	821	DGJMBLJC_03528	HFDHOMNF_03681	ALEPGING_00726	GEOGNNEI_01660	BINKDPLB_02333	IPPPMGOG_04129	NCHKEDON_01936	PLMPIJHD_01454	LIBHOFBA_01264	MFAGDJPO_03432	AICMNGMC_01455	JAGDPAPJ_01598	JICHJFDH_03005	AHEHGMLM_04292	PABJNMJP_00031	MAPHOHON_01902	ONDKMJBG_02816	JDGDJJKN_01249	KLMHLHPE_00946	EGICBAEE_00603	LNEFCFII_01639	NILJAHBC_02284	KCIFOFJF_01587	CJCKLIFP_02427	IABBECJM_01641	LANDOHOG_01180	LOGCBOHO_01180	DKGFALGN_01205	PNFFMGCL_01263	BJCGHIIB_00740	NHHDDJBG_00421	LBLHELLM_00422	CGJPMKCI_00902	JOHJONHN_00656	CNEDDIJH_00976	JLJGJGIB_04073
parC		DNA topoisomerase 4 subunit A	102	102	1	1	13102				632	2258	2228	DGJMBLJC_03540	HFDHOMNF_03669	ALEPGING_00239	GEOGNNEI_01670	BINKDPLB_02343	IPPPMGOG_04139	NCHKEDON_01946	PLMPIJHD_01464	LIBHOFBA_01274	MFAGDJPO_03442	AICMNGMC_01465	JAGDPAPJ_01608	JICHJFDH_02995	AHEHGMLM_04282	PABJNMJP_00021	MAPHOHON_01892	ONDKMJBG_02826	JDGDJJKN_01239	KLMHLHPE_00936	EGICBAEE_00593	LNEFCFII_01649	NILJAHBC_04564	KCIFOFJF_04550	CJCKLIFP_04548	IABBECJM_04561	LANDOHOG_04546	LOGCBOHO_04549	DKGFALGN_01195	PNFFMGCL_01253	BJCGHIIB_00730	NHHDDJBG_00431	LBLHELLM_00432	CGJPMKCI_00892	JOHJONHN_00646	CNEDDIJH_00986	JLJGJGIB_04083
tsaD		tRNA N6-adenosine threonylcarbamoyltransferase	102	102	1	1	13157				623	1013	1005	DGJMBLJC_03576	HFDHOMNF_01125	ALEPGING_02803	GEOGNNEI_01919	BINKDPLB_01314	IPPPMGOG_03502	NCHKEDON_01492	PLMPIJHD_01845	LIBHOFBA_01655	MFAGDJPO_01827	AICMNGMC_01705	JAGDPAPJ_01847	JICHJFDH_01199	AHEHGMLM_03740	PABJNMJP_02439	MAPHOHON_03367	ONDKMJBG_03405	JDGDJJKN_01205	KLMHLHPE_04034	EGICBAEE_03898	LNEFCFII_03821	NILJAHBC_03840	KCIFOFJF_03755	CJCKLIFP_03542	IABBECJM_03585	LANDOHOG_03839	LOGCBOHO_03440	DKGFALGN_03614	PNFFMGCL_03368	BJCGHIIB_03392	NHHDDJBG_03570	LBLHELLM_03374	CGJPMKCI_03564	JOHJONHN_03676	CNEDDIJH_03198	JLJGJGIB_03367
ygjP		UTP pyrophosphatase	102	102	1	1	13195				293	497	494	DGJMBLJC_03635	HFDHOMNF_01140	ALEPGING_02790	GEOGNNEI_01906	BINKDPLB_01301	IPPPMGOG_03515	NCHKEDON_01478	PLMPIJHD_01832	LIBHOFBA_01641	MFAGDJPO_01813	AICMNGMC_01691	JAGDPAPJ_01834	JICHJFDH_01186	AHEHGMLM_03753	PABJNMJP_02426	MAPHOHON_03354	ONDKMJBG_03418	JDGDJJKN_01153	KLMHLHPE_04047	EGICBAEE_03885	LNEFCFII_03834	NILJAHBC_03853	KCIFOFJF_03768	CJCKLIFP_03555	IABBECJM_03598	LANDOHOG_03852	LOGCBOHO_03453	DKGFALGN_03601	PNFFMGCL_03317	BJCGHIIB_03443	NHHDDJBG_03557	LBLHELLM_03387	CGJPMKCI_03551	JOHJONHN_03689	CNEDDIJH_03211	JLJGJGIB_03380
yqjC		Protein YqjC	102	102	1	1	13212				353	368	367	DGJMBLJC_03642	HFDHOMNF_01147	ALEPGING_02783	GEOGNNEI_01899	BINKDPLB_01294	IPPPMGOG_03522	NCHKEDON_01471	PLMPIJHD_01825	LIBHOFBA_01634	MFAGDJPO_01806	AICMNGMC_01684	JAGDPAPJ_01827	JICHJFDH_01179	AHEHGMLM_03760	PABJNMJP_02419	MAPHOHON_03347	ONDKMJBG_03425	JDGDJJKN_01146	KLMHLHPE_04054	EGICBAEE_03878	LNEFCFII_03841	NILJAHBC_03860	KCIFOFJF_03775	CJCKLIFP_03562	IABBECJM_03605	LANDOHOG_03859	LOGCBOHO_03460	DKGFALGN_03594	PNFFMGCL_03310	BJCGHIIB_03450	NHHDDJBG_03550	LBLHELLM_03394	CGJPMKCI_03544	JOHJONHN_03696	CNEDDIJH_03218	JLJGJGIB_03387
yhaH		Inner membrane protein YhaH	102	102	1	1	13221				185	389	362	DGJMBLJC_03648	HFDHOMNF_01153	ALEPGING_02777	GEOGNNEI_01893	BINKDPLB_01288	IPPPMGOG_03528	NCHKEDON_01465	PLMPIJHD_01819	LIBHOFBA_01628	MFAGDJPO_01800	AICMNGMC_01678	JAGDPAPJ_01821	JICHJFDH_01173	AHEHGMLM_03766	PABJNMJP_02413	MAPHOHON_03341	ONDKMJBG_03431	JDGDJJKN_01140	KLMHLHPE_04060	EGICBAEE_03872	LNEFCFII_03847	NILJAHBC_03866	KCIFOFJF_03781	CJCKLIFP_03568	IABBECJM_03611	LANDOHOG_03865	LOGCBOHO_03466	DKGFALGN_03588	PNFFMGCL_03304	BJCGHIIB_03456	NHHDDJBG_03544	LBLHELLM_03400	CGJPMKCI_03538	JOHJONHN_03702	CNEDDIJH_03224	JLJGJGIB_03393
yejK		Nucleoid-associated protein YejK	102	102	1	1	9795				698	1007	1003	DGJMBLJC_03673	HFDHOMNF_01558	ALEPGING_03386	GEOGNNEI_00009	BINKDPLB_00796	IPPPMGOG_01492	NCHKEDON_02259	PLMPIJHD_04725	LIBHOFBA_03746	MFAGDJPO_04478	AICMNGMC_04534	JAGDPAPJ_00010	JICHJFDH_01760	AHEHGMLM_01121	PABJNMJP_03469	MAPHOHON_00010	ONDKMJBG_01956	JDGDJJKN_04116	KLMHLHPE_02133	EGICBAEE_01905	LNEFCFII_01165	NILJAHBC_01167	KCIFOFJF_00010	CJCKLIFP_01167	IABBECJM_00010	LANDOHOG_00009	LOGCBOHO_00009	DKGFALGN_01165	PNFFMGCL_00009	BJCGHIIB_01644	NHHDDJBG_00772	LBLHELLM_03962	CGJPMKCI_01634	JOHJONHN_01411	CNEDDIJH_02802	JLJGJGIB_00905
group_3452		hypothetical protein	102	102	1	1	6168				293	860	852	DGJMBLJC_03795	HFDHOMNF_00300	ALEPGING_01228	GEOGNNEI_00902	BINKDPLB_02225	IPPPMGOG_01913	NCHKEDON_00237	PLMPIJHD_00759	LIBHOFBA_00571	MFAGDJPO_00761	AICMNGMC_00762	JAGDPAPJ_00905	JICHJFDH_04251	AHEHGMLM_02936	PABJNMJP_01420	MAPHOHON_00904	ONDKMJBG_01063	JDGDJJKN_00250	KLMHLHPE_00644	EGICBAEE_00506	LNEFCFII_00272	NILJAHBC_00273	KCIFOFJF_00905	CJCKLIFP_00273	IABBECJM_00905	LANDOHOG_00904	LOGCBOHO_00904	DKGFALGN_00272	PNFFMGCL_00962	BJCGHIIB_00439	NHHDDJBG_00622	LBLHELLM_00723	CGJPMKCI_00271	JOHJONHN_01348	CNEDDIJH_00124	JLJGJGIB_03097
hxpB		Hexitol phosphatase B	102	102	1	1	6165				380	668	665	DGJMBLJC_03797	HFDHOMNF_00298	ALEPGING_01226	GEOGNNEI_00904	BINKDPLB_02223	IPPPMGOG_01915	NCHKEDON_00235	PLMPIJHD_00761	LIBHOFBA_00573	MFAGDJPO_00763	AICMNGMC_00764	JAGDPAPJ_00907	JICHJFDH_04249	AHEHGMLM_02934	PABJNMJP_01422	MAPHOHON_00906	ONDKMJBG_01061	JDGDJJKN_00252	KLMHLHPE_00646	EGICBAEE_00508	LNEFCFII_00270	NILJAHBC_00271	KCIFOFJF_00907	CJCKLIFP_00271	IABBECJM_00907	LANDOHOG_00906	LOGCBOHO_00906	DKGFALGN_00270	PNFFMGCL_00964	BJCGHIIB_00441	NHHDDJBG_00624	LBLHELLM_00721	CGJPMKCI_00269	JOHJONHN_01346	CNEDDIJH_00122	JLJGJGIB_03095
astC		Succinylornithine transaminase	102	102	1	1	6140				833	1226	1222	DGJMBLJC_03819	HFDHOMNF_00273	ALEPGING_01206	GEOGNNEI_00924	BINKDPLB_02203	IPPPMGOG_01935	NCHKEDON_00215	PLMPIJHD_00781	LIBHOFBA_00593	MFAGDJPO_00783	AICMNGMC_00784	JAGDPAPJ_00927	JICHJFDH_04229	AHEHGMLM_02914	PABJNMJP_01442	MAPHOHON_00926	ONDKMJBG_01041	JDGDJJKN_00272	KLMHLHPE_00666	EGICBAEE_00528	LNEFCFII_00250	NILJAHBC_00251	KCIFOFJF_00927	CJCKLIFP_00251	IABBECJM_00927	LANDOHOG_00926	LOGCBOHO_00926	DKGFALGN_00250	PNFFMGCL_00984	BJCGHIIB_00461	NHHDDJBG_00644	LBLHELLM_00701	CGJPMKCI_00249	JOHJONHN_01326	CNEDDIJH_00102	JLJGJGIB_03075
dppC_1		Dipeptide transport system permease protein DppC	102	102	1	1	6051				812	818	812	DGJMBLJC_03875	HFDHOMNF_00224	ALEPGING_03245	GEOGNNEI_00971	BINKDPLB_03479	IPPPMGOG_01982	NCHKEDON_00168	PLMPIJHD_00828	LIBHOFBA_00640	MFAGDJPO_00830	AICMNGMC_00831	JAGDPAPJ_00974	JICHJFDH_01334	AHEHGMLM_01522	PABJNMJP_01489	MAPHOHON_00973	ONDKMJBG_00994	JDGDJJKN_00317	KLMHLHPE_00713	EGICBAEE_02844	LNEFCFII_00203	NILJAHBC_00204	KCIFOFJF_00974	CJCKLIFP_00204	IABBECJM_00974	LANDOHOG_00973	LOGCBOHO_00973	DKGFALGN_00203	PNFFMGCL_01031	BJCGHIIB_00508	NHHDDJBG_00691	LBLHELLM_00654	CGJPMKCI_00202	JOHJONHN_01279	CNEDDIJH_00055	JLJGJGIB_03028
nagK_1		N-acetyl-D-glucosamine kinase	102	102	1	1	5964				440	911	906	DGJMBLJC_03913	HFDHOMNF_00187	ALEPGING_03149	GEOGNNEI_01007	BINKDPLB_04291	IPPPMGOG_02018	NCHKEDON_00132	PLMPIJHD_00864	LIBHOFBA_00676	MFAGDJPO_00866	AICMNGMC_00867	JAGDPAPJ_01010	JICHJFDH_01298	AHEHGMLM_01558	PABJNMJP_01525	MAPHOHON_01009	ONDKMJBG_00958	JDGDJJKN_00352	KLMHLHPE_00749	EGICBAEE_02880	LNEFCFII_00167	NILJAHBC_00168	KCIFOFJF_01010	CJCKLIFP_00168	IABBECJM_01010	LANDOHOG_01009	LOGCBOHO_01009	DKGFALGN_00167	PNFFMGCL_01067	BJCGHIIB_00544	NHHDDJBG_00727	LBLHELLM_00618	CGJPMKCI_00166	JOHJONHN_01243	CNEDDIJH_00019	JLJGJGIB_02992
ycfS		putative L,D-transpeptidase YcfS	102	102	1	1	5959				791	965	960	DGJMBLJC_03918	HFDHOMNF_00181	ALEPGING_03144	GEOGNNEI_01012	BINKDPLB_04286	IPPPMGOG_02023	NCHKEDON_00127	PLMPIJHD_00869	LIBHOFBA_00681	MFAGDJPO_00871	AICMNGMC_00872	JAGDPAPJ_01015	JICHJFDH_01293	AHEHGMLM_01563	PABJNMJP_01530	MAPHOHON_01014	ONDKMJBG_00953	JDGDJJKN_00357	KLMHLHPE_00754	EGICBAEE_02885	LNEFCFII_00162	NILJAHBC_00163	KCIFOFJF_01015	CJCKLIFP_00163	IABBECJM_01015	LANDOHOG_01014	LOGCBOHO_01014	DKGFALGN_00162	PNFFMGCL_01072	BJCGHIIB_00549	NHHDDJBG_00732	LBLHELLM_00613	CGJPMKCI_00161	JOHJONHN_01238	CNEDDIJH_00014	JLJGJGIB_02987
flgA		Flagella basal body P-ring formation protein FlgA	102	102	1	1	5893				632	659	658	DGJMBLJC_03965	HFDHOMNF_00138	ALEPGING_02201	GEOGNNEI_01053	BINKDPLB_04245	IPPPMGOG_02064	NCHKEDON_00086	PLMPIJHD_00910	LIBHOFBA_00722	MFAGDJPO_00912	AICMNGMC_00913	JAGDPAPJ_01056	JICHJFDH_01252	AHEHGMLM_01604	PABJNMJP_01571	MAPHOHON_01055	ONDKMJBG_00912	JDGDJJKN_00399	KLMHLHPE_00795	EGICBAEE_02926	LNEFCFII_00121	NILJAHBC_00121	KCIFOFJF_01057	CJCKLIFP_00121	IABBECJM_01057	LANDOHOG_01056	LOGCBOHO_01056	DKGFALGN_00121	PNFFMGCL_01113	BJCGHIIB_00590	NHHDDJBG_03019	LBLHELLM_00572	CGJPMKCI_00120	JOHJONHN_01197	CNEDDIJH_02560	JLJGJGIB_02712
yceB		putative lipoprotein YceB	102	102	1	1	5880				512	629	560	DGJMBLJC_03975	HFDHOMNF_00127	ALEPGING_02192	GEOGNNEI_01062	BINKDPLB_04236	IPPPMGOG_02073	NCHKEDON_00077	PLMPIJHD_00919	LIBHOFBA_00731	MFAGDJPO_00921	AICMNGMC_00922	JAGDPAPJ_01065	JICHJFDH_01243	AHEHGMLM_01613	PABJNMJP_01580	MAPHOHON_01064	ONDKMJBG_00903	JDGDJJKN_00408	KLMHLHPE_00804	EGICBAEE_02935	LNEFCFII_00112	NILJAHBC_00112	KCIFOFJF_01066	CJCKLIFP_00112	IABBECJM_01066	LANDOHOG_01065	LOGCBOHO_01065	DKGFALGN_00112	PNFFMGCL_01122	BJCGHIIB_00599	NHHDDJBG_03028	LBLHELLM_00563	CGJPMKCI_00111	JOHJONHN_01188	CNEDDIJH_02569	JLJGJGIB_02721
group_3494		hypothetical protein	102	102	1	1	5865				179	374	370	DGJMBLJC_03988	HFDHOMNF_00116	ALEPGING_03196	GEOGNNEI_01073	BINKDPLB_04225	IPPPMGOG_04328	NCHKEDON_02884	PLMPIJHD_00930	LIBHOFBA_00742	MFAGDJPO_00932	AICMNGMC_00933	JAGDPAPJ_01076	JICHJFDH_01232	AHEHGMLM_01624	PABJNMJP_01591	MAPHOHON_01075	ONDKMJBG_00892	JDGDJJKN_00419	KLMHLHPE_00815	EGICBAEE_02946	LNEFCFII_00101	NILJAHBC_00101	KCIFOFJF_01077	CJCKLIFP_00101	IABBECJM_01077	LANDOHOG_01076	LOGCBOHO_01076	DKGFALGN_00101	PNFFMGCL_01133	BJCGHIIB_00610	NHHDDJBG_03039	LBLHELLM_00552	CGJPMKCI_00100	JOHJONHN_01177	CNEDDIJH_02580	JLJGJGIB_02732
group_3502		putative acyl-CoA thioester hydrolase	102	102	1	1	7410				374	401	400	DGJMBLJC_04034	HFDHOMNF_00748	ALEPGING_03718	GEOGNNEI_00486	BINKDPLB_01027	IPPPMGOG_02278	NCHKEDON_03820	PLMPIJHD_00344	LIBHOFBA_00153	MFAGDJPO_00344	AICMNGMC_00344	JAGDPAPJ_00487	JICHJFDH_00477	AHEHGMLM_00644	PABJNMJP_01003	MAPHOHON_00487	ONDKMJBG_01480	JDGDJJKN_02054	KLMHLHPE_00228	EGICBAEE_00089	LNEFCFII_00689	NILJAHBC_00690	KCIFOFJF_00488	CJCKLIFP_00690	IABBECJM_00488	LANDOHOG_00487	LOGCBOHO_00487	DKGFALGN_00689	PNFFMGCL_00486	BJCGHIIB_03874	NHHDDJBG_01874	LBLHELLM_02122	CGJPMKCI_00700	JOHJONHN_00262	CNEDDIJH_00541	JLJGJGIB_00245
pgpB		Phosphatidylglycerophosphatase B	102	102	1	1	7373				248	764	758	DGJMBLJC_04063	HFDHOMNF_00719	ALEPGING_02832	GEOGNNEI_00512	BINKDPLB_01001	IPPPMGOG_02182	NCHKEDON_03793	PLMPIJHD_00371	LIBHOFBA_00180	MFAGDJPO_00371	AICMNGMC_00371	JAGDPAPJ_00514	JICHJFDH_00503	AHEHGMLM_00617	PABJNMJP_01030	MAPHOHON_00514	ONDKMJBG_01453	JDGDJJKN_02081	KLMHLHPE_00254	EGICBAEE_00116	LNEFCFII_00662	NILJAHBC_00663	KCIFOFJF_00515	CJCKLIFP_00663	IABBECJM_00515	LANDOHOG_00514	LOGCBOHO_00514	DKGFALGN_00662	PNFFMGCL_00512	BJCGHIIB_03900	NHHDDJBG_01848	LBLHELLM_02148	CGJPMKCI_00674	JOHJONHN_00289	CNEDDIJH_00514	JLJGJGIB_00219
ttcA		tRNA-cytidine(32) 2-sulfurtransferase	102	102	1	1	7253				935	935	935	DGJMBLJC_04130	HFDHOMNF_00661	ALEPGING_03690	GEOGNNEI_00568	BINKDPLB_02822	IPPPMGOG_01579	NCHKEDON_00571	PLMPIJHD_00427	LIBHOFBA_00236	MFAGDJPO_00427	AICMNGMC_00427	JAGDPAPJ_00570	JICHJFDH_00559	AHEHGMLM_00561	PABJNMJP_01086	MAPHOHON_00570	ONDKMJBG_01397	JDGDJJKN_02149	KLMHLHPE_00310	EGICBAEE_00172	LNEFCFII_00606	NILJAHBC_00607	KCIFOFJF_00571	CJCKLIFP_00607	IABBECJM_00571	LANDOHOG_00570	LOGCBOHO_00570	DKGFALGN_00606	PNFFMGCL_00568	BJCGHIIB_00046	NHHDDJBG_01609	LBLHELLM_01788	CGJPMKCI_00618	JOHJONHN_00345	CNEDDIJH_00458	JLJGJGIB_00163
maeA		NAD-dependent malic enzyme	102	102	1	1	7082				587	1697	1680	DGJMBLJC_04235	HFDHOMNF_00566	ALEPGING_02429	GEOGNNEI_00657	BINKDPLB_02733	IPPPMGOG_01668	NCHKEDON_00482	PLMPIJHD_00516	LIBHOFBA_00325	MFAGDJPO_00516	AICMNGMC_00516	JAGDPAPJ_00660	JICHJFDH_00649	AHEHGMLM_00471	PABJNMJP_01175	MAPHOHON_00659	ONDKMJBG_01308	JDGDJJKN_00007	KLMHLHPE_00399	EGICBAEE_00261	LNEFCFII_00517	NILJAHBC_00518	KCIFOFJF_00660	CJCKLIFP_00518	IABBECJM_00660	LANDOHOG_00659	LOGCBOHO_00659	DKGFALGN_00517	PNFFMGCL_00657	BJCGHIIB_00135	NHHDDJBG_01520	LBLHELLM_01877	CGJPMKCI_00529	JOHJONHN_00434	CNEDDIJH_00369	JLJGJGIB_00074
ygiW_1		Protein YgiW	102	102	1	1	6921				335	392	390	DGJMBLJC_04294	HFDHOMNF_00507	ALEPGING_02984	GEOGNNEI_00713	BINKDPLB_02677	IPPPMGOG_01724	NCHKEDON_00426	PLMPIJHD_00570	LIBHOFBA_00381	MFAGDJPO_00572	AICMNGMC_00572	JAGDPAPJ_00716	JICHJFDH_00704	AHEHGMLM_00415	PABJNMJP_01231	MAPHOHON_00715	ONDKMJBG_01252	JDGDJJKN_00062	KLMHLHPE_00455	EGICBAEE_00317	LNEFCFII_00461	NILJAHBC_00462	KCIFOFJF_00716	CJCKLIFP_00462	IABBECJM_00716	LANDOHOG_00715	LOGCBOHO_00715	DKGFALGN_00461	PNFFMGCL_00713	BJCGHIIB_00190	NHHDDJBG_01465	LBLHELLM_01932	CGJPMKCI_00460	JOHJONHN_00491	CNEDDIJH_00313	JLJGJGIB_00018
hisI		Histidine biosynthesis bifunctional protein HisIE	102	102	1	1	9471				464	611	609	DGJMBLJC_04407	HFDHOMNF_01102	ALEPGING_04356	GEOGNNEI_00148	BINKDPLB_02938	IPPPMGOG_02615	NCHKEDON_04157	PLMPIJHD_00006	LIBHOFBA_03607	MFAGDJPO_00006	AICMNGMC_00006	JAGDPAPJ_00149	JICHJFDH_01621	AHEHGMLM_00982	PABJNMJP_03330	MAPHOHON_00149	ONDKMJBG_01817	JDGDJJKN_01701	KLMHLHPE_01994	EGICBAEE_02045	LNEFCFII_01026	NILJAHBC_01028	KCIFOFJF_00149	CJCKLIFP_01028	IABBECJM_00149	LANDOHOG_00148	LOGCBOHO_00148	DKGFALGN_01026	PNFFMGCL_00148	BJCGHIIB_01505	NHHDDJBG_00911	LBLHELLM_03243	CGJPMKCI_01495	JOHJONHN_01550	CNEDDIJH_03788	JLJGJGIB_01044
wzzB		Chain length determinant protein	102	102	1	1	9472				521	983	978	DGJMBLJC_04408	HFDHOMNF_01103	ALEPGING_04355	GEOGNNEI_00147	BINKDPLB_02939	IPPPMGOG_02616	NCHKEDON_04158	PLMPIJHD_00005	LIBHOFBA_03608	MFAGDJPO_00005	AICMNGMC_00005	JAGDPAPJ_00148	JICHJFDH_01622	AHEHGMLM_00983	PABJNMJP_03331	MAPHOHON_00148	ONDKMJBG_01818	JDGDJJKN_01700	KLMHLHPE_01995	EGICBAEE_02044	LNEFCFII_01027	NILJAHBC_01029	KCIFOFJF_00148	CJCKLIFP_01029	IABBECJM_00148	LANDOHOG_00147	LOGCBOHO_00147	DKGFALGN_01027	PNFFMGCL_00147	BJCGHIIB_01506	NHHDDJBG_00910	LBLHELLM_03242	CGJPMKCI_01496	JOHJONHN_01549	CNEDDIJH_03787	JLJGJGIB_01043
wzc		Tyrosine-protein kinase wzc	102	102	1	1	9575				2084	2159	2157	DGJMBLJC_04457	HFDHOMNF_01439	ALEPGING_04114	GEOGNNEI_00119	BINKDPLB_00686	IPPPMGOG_02632	NCHKEDON_02369	PLMPIJHD_04615	LIBHOFBA_03636	MFAGDJPO_04368	AICMNGMC_04423	JAGDPAPJ_00120	JICHJFDH_01650	AHEHGMLM_01011	PABJNMJP_03359	MAPHOHON_00120	ONDKMJBG_01846	JDGDJJKN_04247	KLMHLHPE_02023	EGICBAEE_02015	LNEFCFII_01055	NILJAHBC_01057	KCIFOFJF_00120	CJCKLIFP_01057	IABBECJM_00120	LANDOHOG_00119	LOGCBOHO_00119	DKGFALGN_01055	PNFFMGCL_00119	BJCGHIIB_01534	NHHDDJBG_00882	LBLHELLM_01547	CGJPMKCI_01524	JOHJONHN_01521	CNEDDIJH_02692	JLJGJGIB_01015
wzb		Low molecular weight protein-tyrosine-phosphatase Wzb	102	102	1	1	9576				206	449	446	DGJMBLJC_04458	HFDHOMNF_01440	ALEPGING_04115	GEOGNNEI_00118	BINKDPLB_00687	IPPPMGOG_02633	NCHKEDON_02368	PLMPIJHD_04616	LIBHOFBA_03637	MFAGDJPO_04369	AICMNGMC_04424	JAGDPAPJ_00119	JICHJFDH_01651	AHEHGMLM_01012	PABJNMJP_03360	MAPHOHON_00119	ONDKMJBG_01847	JDGDJJKN_04248	KLMHLHPE_02024	EGICBAEE_02014	LNEFCFII_01056	NILJAHBC_01058	KCIFOFJF_00119	CJCKLIFP_01058	IABBECJM_00119	LANDOHOG_00118	LOGCBOHO_00118	DKGFALGN_01056	PNFFMGCL_00118	BJCGHIIB_01535	NHHDDJBG_00881	LBLHELLM_01548	CGJPMKCI_01525	JOHJONHN_01520	CNEDDIJH_02693	JLJGJGIB_01014
group_3553		hypothetical protein	102	102	1	1	9578				152	1580	1562	DGJMBLJC_04461	HFDHOMNF_01442	ALEPGING_01053	GEOGNNEI_00116	BINKDPLB_00689	IPPPMGOG_02635	NCHKEDON_02366	PLMPIJHD_04618	LIBHOFBA_03639	MFAGDJPO_04371	AICMNGMC_04426	JAGDPAPJ_00117	JICHJFDH_01653	AHEHGMLM_01014	PABJNMJP_03362	MAPHOHON_00117	ONDKMJBG_01849	JDGDJJKN_04250	KLMHLHPE_02026	EGICBAEE_02012	LNEFCFII_01058	NILJAHBC_01060	KCIFOFJF_00117	CJCKLIFP_01060	IABBECJM_00117	LANDOHOG_00116	LOGCBOHO_00116	DKGFALGN_01058	PNFFMGCL_00116	BJCGHIIB_01537	NHHDDJBG_00879	LBLHELLM_01550	CGJPMKCI_01527	JOHJONHN_01518	CNEDDIJH_02695	JLJGJGIB_01012
yohC		Inner membrane protein YohC	102	102	1	1	9696				467	587	583	DGJMBLJC_04536	HFDHOMNF_01498	ALEPGING_04131	GEOGNNEI_00065	BINKDPLB_00740	IPPPMGOG_02686	NCHKEDON_02315	PLMPIJHD_04669	LIBHOFBA_03690	MFAGDJPO_04422	AICMNGMC_04478	JAGDPAPJ_00066	JICHJFDH_01704	AHEHGMLM_01065	PABJNMJP_03413	MAPHOHON_00066	ONDKMJBG_01900	JDGDJJKN_04059	KLMHLHPE_02077	EGICBAEE_01961	LNEFCFII_01109	NILJAHBC_01111	KCIFOFJF_00066	CJCKLIFP_01111	IABBECJM_00066	LANDOHOG_00065	LOGCBOHO_00065	DKGFALGN_01109	PNFFMGCL_00065	BJCGHIIB_01588	NHHDDJBG_00828	LBLHELLM_01601	CGJPMKCI_01578	JOHJONHN_01467	CNEDDIJH_02746	JLJGJGIB_00961
cdd		Cytidine deaminase	102	102	1	1	9719				683	908	882	DGJMBLJC_04550	HFDHOMNF_01511	ALEPGING_04118	GEOGNNEI_00052	BINKDPLB_00753	IPPPMGOG_02699	NCHKEDON_02302	PLMPIJHD_04682	LIBHOFBA_03703	MFAGDJPO_04435	AICMNGMC_04491	JAGDPAPJ_00053	JICHJFDH_01717	AHEHGMLM_01078	PABJNMJP_03426	MAPHOHON_00053	ONDKMJBG_01913	JDGDJJKN_04072	KLMHLHPE_02090	EGICBAEE_01948	LNEFCFII_01122	NILJAHBC_01124	KCIFOFJF_00053	CJCKLIFP_01124	IABBECJM_00053	LANDOHOG_00052	LOGCBOHO_00052	DKGFALGN_01122	PNFFMGCL_00052	BJCGHIIB_01601	NHHDDJBG_00815	LBLHELLM_01614	CGJPMKCI_01591	JOHJONHN_01454	CNEDDIJH_02759	JLJGJGIB_00948
ribC		Riboflavin synthase	102	102	1	1	6352				533	662	639	DGJMBLJC_04590	HFDHOMNF_00412	ALEPGING_04146	GEOGNNEI_00803	BINKDPLB_02034	IPPPMGOG_01814	NCHKEDON_00336	PLMPIJHD_00660	LIBHOFBA_00472	MFAGDJPO_00662	AICMNGMC_00663	JAGDPAPJ_00806	JICHJFDH_04350	AHEHGMLM_03036	PABJNMJP_01321	MAPHOHON_00805	ONDKMJBG_01162	JDGDJJKN_00151	KLMHLHPE_00545	EGICBAEE_00407	LNEFCFII_00371	NILJAHBC_00372	KCIFOFJF_00806	CJCKLIFP_00372	IABBECJM_00806	LANDOHOG_00805	LOGCBOHO_00805	DKGFALGN_00371	PNFFMGCL_00803	BJCGHIIB_00280	NHHDDJBG_00523	LBLHELLM_00822	CGJPMKCI_00370	JOHJONHN_00581	CNEDDIJH_00223	JLJGJGIB_02095
anmK		Anhydro-N-acetylmuramic acid kinase	102	102	1	1	6758				632	1124	1116	DGJMBLJC_04612	HFDHOMNF_00433	ALEPGING_04167	GEOGNNEI_00782	BINKDPLB_02013	IPPPMGOG_01793	NCHKEDON_00357	PLMPIJHD_00639	LIBHOFBA_00451	MFAGDJPO_00641	AICMNGMC_00642	JAGDPAPJ_00785	JICHJFDH_04371	AHEHGMLM_03057	PABJNMJP_01300	MAPHOHON_00784	ONDKMJBG_01183	JDGDJJKN_00131	KLMHLHPE_00524	EGICBAEE_00386	LNEFCFII_00392	NILJAHBC_00393	KCIFOFJF_00785	CJCKLIFP_00393	IABBECJM_00785	LANDOHOG_00784	LOGCBOHO_00784	DKGFALGN_00392	PNFFMGCL_00782	BJCGHIIB_00259	NHHDDJBG_00502	LBLHELLM_00843	CGJPMKCI_00391	JOHJONHN_00560	CNEDDIJH_00244	JLJGJGIB_02074
dtpA		Dipeptide and tripeptide permease A	102	102	1	1	6765				1031	1505	1499	DGJMBLJC_04618	HFDHOMNF_00439	ALEPGING_04173	GEOGNNEI_00776	BINKDPLB_02007	IPPPMGOG_01787	NCHKEDON_00363	PLMPIJHD_00633	LIBHOFBA_00445	MFAGDJPO_00635	AICMNGMC_00635	JAGDPAPJ_00779	JICHJFDH_04377	AHEHGMLM_03063	PABJNMJP_01294	MAPHOHON_00778	ONDKMJBG_01189	JDGDJJKN_00125	KLMHLHPE_00518	EGICBAEE_00380	LNEFCFII_00398	NILJAHBC_00399	KCIFOFJF_00779	CJCKLIFP_00399	IABBECJM_00779	LANDOHOG_00778	LOGCBOHO_00778	DKGFALGN_00398	PNFFMGCL_00776	BJCGHIIB_00253	NHHDDJBG_00496	LBLHELLM_00849	CGJPMKCI_00397	JOHJONHN_00554	CNEDDIJH_00250	JLJGJGIB_02068
pdxA		4-hydroxythreonine-4-phosphate dehydrogenase	102	102	1	1	10988				989	989	989	DGJMBLJC_04663	HFDHOMNF_02513	ALEPGING_01772	GEOGNNEI_03224	BINKDPLB_00500	IPPPMGOG_00100	NCHKEDON_01201	PLMPIJHD_03467	LIBHOFBA_03242	MFAGDJPO_02567	AICMNGMC_03488	JAGDPAPJ_03485	JICHJFDH_01506	AHEHGMLM_00158	PABJNMJP_04452	MAPHOHON_01710	ONDKMJBG_00373	JDGDJJKN_02354	KLMHLHPE_01654	EGICBAEE_01650	LNEFCFII_02253	NILJAHBC_01658	KCIFOFJF_01422	CJCKLIFP_01761	IABBECJM_02311	LANDOHOG_02310	LOGCBOHO_01888	DKGFALGN_01870	PNFFMGCL_02067	BJCGHIIB_01688	NHHDDJBG_01412	LBLHELLM_01374	CGJPMKCI_01678	JOHJONHN_01777	CNEDDIJH_01287	JLJGJGIB_01146
leuB		3-isopropylmalate dehydrogenase	102	102	1	1	10951				317	1091	1081	DGJMBLJC_04684	HFDHOMNF_02535	ALEPGING_02691	GEOGNNEI_03246	BINKDPLB_00522	IPPPMGOG_00122	NCHKEDON_01179	PLMPIJHD_03489	LIBHOFBA_03264	MFAGDJPO_02589	AICMNGMC_03510	JAGDPAPJ_03507	JICHJFDH_01483	AHEHGMLM_00136	PABJNMJP_04474	MAPHOHON_01732	ONDKMJBG_00395	JDGDJJKN_02331	KLMHLHPE_01676	EGICBAEE_01628	LNEFCFII_02231	NILJAHBC_01680	KCIFOFJF_01444	CJCKLIFP_01739	IABBECJM_02333	LANDOHOG_02332	LOGCBOHO_01910	DKGFALGN_01892	PNFFMGCL_02089	BJCGHIIB_01710	NHHDDJBG_01390	LBLHELLM_01396	CGJPMKCI_01700	JOHJONHN_01755	CNEDDIJH_01309	JLJGJGIB_01168
nadC		Nicotinate-nucleotide pyrophosphorylase [carboxylating]	102	102	1	1	10904				194	893	886	DGJMBLJC_04721	HFDHOMNF_02574	ALEPGING_01886	GEOGNNEI_03280	BINKDPLB_00556	IPPPMGOG_00156	NCHKEDON_01145	PLMPIJHD_03523	LIBHOFBA_03298	MFAGDJPO_02623	AICMNGMC_03544	JAGDPAPJ_03541	JICHJFDH_01449	AHEHGMLM_00102	PABJNMJP_04508	MAPHOHON_01766	ONDKMJBG_00429	JDGDJJKN_02299	KLMHLHPE_01710	EGICBAEE_01594	LNEFCFII_02197	NILJAHBC_01714	KCIFOFJF_01478	CJCKLIFP_01705	IABBECJM_02367	LANDOHOG_02366	LOGCBOHO_01944	DKGFALGN_01926	PNFFMGCL_02123	BJCGHIIB_01744	NHHDDJBG_01356	LBLHELLM_01430	CGJPMKCI_01734	JOHJONHN_01721	CNEDDIJH_01343	JLJGJGIB_01202
btuF		Vitamin B12-binding protein	102	102	1	1	10780				800	800	800	DGJMBLJC_04795	HFDHOMNF_02652	ALEPGING_00283	GEOGNNEI_03343	BINKDPLB_00619	IPPPMGOG_00219	NCHKEDON_01082	PLMPIJHD_03586	LIBHOFBA_03361	MFAGDJPO_02222	AICMNGMC_03607	JAGDPAPJ_03604	JICHJFDH_01386	AHEHGMLM_00039	PABJNMJP_04571	MAPHOHON_01829	ONDKMJBG_00492	JDGDJJKN_04312	KLMHLHPE_01773	EGICBAEE_01531	LNEFCFII_02134	NILJAHBC_01777	KCIFOFJF_01541	CJCKLIFP_01642	IABBECJM_02430	LANDOHOG_02429	LOGCBOHO_02007	DKGFALGN_01989	PNFFMGCL_02186	BJCGHIIB_01807	NHHDDJBG_01293	LBLHELLM_01493	CGJPMKCI_01797	JOHJONHN_01658	CNEDDIJH_01406	JLJGJGIB_01265
map		Methionine aminopeptidase	102	102	1	1	10762				581	794	791	DGJMBLJC_04806	HFDHOMNF_02661	ALEPGING_00274	GEOGNNEI_03352	BINKDPLB_00628	IPPPMGOG_00228	NCHKEDON_01073	PLMPIJHD_03595	LIBHOFBA_03370	MFAGDJPO_02231	AICMNGMC_03616	JAGDPAPJ_03613	JICHJFDH_01377	AHEHGMLM_00030	PABJNMJP_04580	MAPHOHON_01838	ONDKMJBG_00501	JDGDJJKN_04303	KLMHLHPE_01782	EGICBAEE_01522	LNEFCFII_02125	NILJAHBC_01786	KCIFOFJF_01550	CJCKLIFP_01633	IABBECJM_02439	LANDOHOG_02438	LOGCBOHO_02016	DKGFALGN_01998	PNFFMGCL_02195	BJCGHIIB_01816	NHHDDJBG_01284	LBLHELLM_01502	CGJPMKCI_01806	JOHJONHN_01649	CNEDDIJH_01415	JLJGJGIB_01274
yaeQ		putative protein YaeQ	102	102	1	1	10727				545	578	545	DGJMBLJC_04832	HFDHOMNF_02688	ALEPGING_03664	GEOGNNEI_03376	BINKDPLB_00652	IPPPMGOG_00252	NCHKEDON_01049	PLMPIJHD_03619	LIBHOFBA_03394	MFAGDJPO_02255	AICMNGMC_03640	JAGDPAPJ_03637	JICHJFDH_01353	AHEHGMLM_00006	PABJNMJP_04604	MAPHOHON_01862	ONDKMJBG_00525	JDGDJJKN_04279	KLMHLHPE_01806	EGICBAEE_01498	LNEFCFII_02101	NILJAHBC_01810	KCIFOFJF_01574	CJCKLIFP_01609	IABBECJM_02463	LANDOHOG_02462	LOGCBOHO_02040	DKGFALGN_02022	PNFFMGCL_02219	BJCGHIIB_01840	NHHDDJBG_01260	LBLHELLM_01526	CGJPMKCI_01830	JOHJONHN_01625	CNEDDIJH_01439	JLJGJGIB_01298
metI		D-methionine transport system permease protein MetI	102	102	1	1	10715				335	653	647	DGJMBLJC_04839	HFDHOMNF_02695	ALEPGING_03657	GEOGNNEI_03383	BINKDPLB_00659	IPPPMGOG_00259	NCHKEDON_01042	PLMPIJHD_03626	LIBHOFBA_03401	MFAGDJPO_02262	AICMNGMC_03647	JAGDPAPJ_03644	JICHJFDH_01346	AHEHGMLM_03780	PABJNMJP_04611	MAPHOHON_01869	ONDKMJBG_00532	JDGDJJKN_04272	KLMHLHPE_01813	EGICBAEE_01491	LNEFCFII_02094	NILJAHBC_01817	KCIFOFJF_01581	CJCKLIFP_01602	IABBECJM_02470	LANDOHOG_02469	LOGCBOHO_02047	DKGFALGN_02029	PNFFMGCL_02226	BJCGHIIB_01847	NHHDDJBG_01253	LBLHELLM_01533	CGJPMKCI_01837	JOHJONHN_01618	CNEDDIJH_01446	JLJGJGIB_01305
tesB		Acyl-CoA thioesterase 2	102	102	1	1	402				623	860	857	DGJMBLJC_04851	HFDHOMNF_01665	ALEPGING_00568	GEOGNNEI_01781	BINKDPLB_01723	IPPPMGOG_00486	NCHKEDON_03013	PLMPIJHD_01574	LIBHOFBA_01384	MFAGDJPO_01555	AICMNGMC_04632	JAGDPAPJ_04686	JICHJFDH_00217	AHEHGMLM_03590	PABJNMJP_01983	MAPHOHON_03605	ONDKMJBG_04380	JDGDJJKN_03728	KLMHLHPE_03458	EGICBAEE_02384	LNEFCFII_03468	NILJAHBC_02799	KCIFOFJF_02097	CJCKLIFP_02653	IABBECJM_02695	LANDOHOG_02561	LOGCBOHO_03764	DKGFALGN_02254	PNFFMGCL_03154	BJCGHIIB_03327	NHHDDJBG_02919	LBLHELLM_03063	CGJPMKCI_03265	JOHJONHN_02840	CNEDDIJH_02900	JLJGJGIB_02922
amtB		Ammonia channel	102	102	1	1	403				1184	1304	1284	DGJMBLJC_04852	HFDHOMNF_01666	ALEPGING_00567	GEOGNNEI_01782	BINKDPLB_01724	IPPPMGOG_00485	NCHKEDON_03014	PLMPIJHD_01575	LIBHOFBA_01385	MFAGDJPO_01556	AICMNGMC_04633	JAGDPAPJ_04687	JICHJFDH_00216	AHEHGMLM_03591	PABJNMJP_01984	MAPHOHON_03606	ONDKMJBG_04379	JDGDJJKN_03727	KLMHLHPE_03457	EGICBAEE_02385	LNEFCFII_03467	NILJAHBC_02800	KCIFOFJF_02098	CJCKLIFP_02652	IABBECJM_02694	LANDOHOG_02562	LOGCBOHO_03763	DKGFALGN_02253	PNFFMGCL_03153	BJCGHIIB_03328	NHHDDJBG_02918	LBLHELLM_03064	CGJPMKCI_03264	JOHJONHN_02839	CNEDDIJH_02901	JLJGJGIB_02923
cof		HMP-PP phosphatase	102	102	1	1	412				392	818	813	DGJMBLJC_04860	HFDHOMNF_01673	ALEPGING_00561	GEOGNNEI_01788	BINKDPLB_01730	IPPPMGOG_00479	NCHKEDON_03020	PLMPIJHD_01581	LIBHOFBA_01391	MFAGDJPO_01562	AICMNGMC_04639	JAGDPAPJ_04693	JICHJFDH_02619	AHEHGMLM_03597	PABJNMJP_01990	MAPHOHON_03612	ONDKMJBG_04373	JDGDJJKN_03721	KLMHLHPE_03451	EGICBAEE_02391	LNEFCFII_03461	NILJAHBC_02806	KCIFOFJF_02104	CJCKLIFP_02646	IABBECJM_02688	LANDOHOG_02568	LOGCBOHO_03757	DKGFALGN_02247	PNFFMGCL_03147	BJCGHIIB_03334	NHHDDJBG_02912	LBLHELLM_03070	CGJPMKCI_03258	JOHJONHN_02833	CNEDDIJH_02907	JLJGJGIB_02929
tsx		Nucleoside-specific channel-forming protein Tsx	102	102	1	1	481				773	968	863	DGJMBLJC_04910	HFDHOMNF_01720	ALEPGING_03810	GEOGNNEI_01832	BINKDPLB_01774	IPPPMGOG_00435	NCHKEDON_03121	PLMPIJHD_01626	LIBHOFBA_01435	MFAGDJPO_01606	AICMNGMC_04683	JAGDPAPJ_04737	JICHJFDH_02663	AHEHGMLM_04422	PABJNMJP_02034	MAPHOHON_03656	ONDKMJBG_04329	JDGDJJKN_03677	KLMHLHPE_03407	EGICBAEE_02435	LNEFCFII_03417	NILJAHBC_02850	KCIFOFJF_02148	CJCKLIFP_02602	IABBECJM_02644	LANDOHOG_02612	LOGCBOHO_03713	DKGFALGN_02203	PNFFMGCL_03103	BJCGHIIB_03378	NHHDDJBG_02868	LBLHELLM_03114	CGJPMKCI_03214	JOHJONHN_02789	CNEDDIJH_02951	JLJGJGIB_02973
group_3648		hypothetical protein	102	102	1	1	568				131	131	131	DGJMBLJC_04973	HFDHOMNF_04392	ALEPGING_02384	GEOGNNEI_04307	BINKDPLB_02612	IPPPMGOG_00383	NCHKEDON_03173	PLMPIJHD_04418	LIBHOFBA_04501	MFAGDJPO_04293	AICMNGMC_04226	JAGDPAPJ_04411	JICHJFDH_02581	AHEHGMLM_03189	PABJNMJP_02155	MAPHOHON_03109	ONDKMJBG_02533	JDGDJJKN_03626	KLMHLHPE_03222	EGICBAEE_02487	LNEFCFII_03232	NILJAHBC_02902	KCIFOFJF_02200	CJCKLIFP_02550	IABBECJM_02592	LANDOHOG_02664	LOGCBOHO_03307	DKGFALGN_02151	PNFFMGCL_02850	BJCGHIIB_02841	NHHDDJBG_02631	LBLHELLM_02780	CGJPMKCI_03022	JOHJONHN_02670	CNEDDIJH_02124	JLJGJGIB_02266
nuoG		NADH-quinone oxidoreductase subunit G	102	102	1	1	10017				1697	2750	2716	DGJMBLJC_02317	HFDHOMNF_04630	ALEPGING_00677	GEOGNNEI_02510	BINKDPLB_00877	IPPPMGOG_00733	NCHKEDON_00686	PLMPIJHD_02486	LIBHOFBA_02297	MFAGDJPO_01106	AICMNGMC_02606	JAGDPAPJ_02541	JICHJFDH_03151	AHEHGMLM_01201	PABJNMJP_03788	MAPHOHON_02626	ONDKMJBG_02918	JDGDJJKN_02809	KLMHLHPE_03025	EGICBAEE_01138	LNEFCFII_01741	NILJAHBC_02638	KCIFOFJF_02528	CJCKLIFP_01249	IABBECJM_01995	LANDOHOG_01715	LOGCBOHO_02400	DKGFALGN_03161	PNFFMGCL_01962	BJCGHIIB_03169	NHHDDJBG_02792	LBLHELLM_02901	CGJPMKCI_03144	JOHJONHN_01977	CNEDDIJH_02505	JLJGJGIB_03205
adiC		Arginine/agmatine antiporter	102	102	1	1	15974				599	1346	1329	DGJMBLJC_00477	HFDHOMNF_04280	ALEPGING_01431	GEOGNNEI_03518	BINKDPLB_04426	IPPPMGOG_02971	NCHKEDON_04299	PLMPIJHD_03793	LIBHOFBA_03883	MFAGDJPO_03603	AICMNGMC_03792	JAGDPAPJ_03794	JICHJFDH_04071	AHEHGMLM_01850	PABJNMJP_00562	MAPHOHON_01289	ONDKMJBG_02216	JDGDJJKN_03867	KLMHLHPE_03671	EGICBAEE_02730	LNEFCFII_02621	NILJAHBC_01288	KCIFOFJF_02711	CJCKLIFP_02867	IABBECJM_02897	LANDOHOG_02895	LOGCBOHO_02594	DKGFALGN_02982	PNFFMGCL_03507	BJCGHIIB_03783	NHHDDJBG_02468	LBLHELLM_02575	CGJPMKCI_02456	JOHJONHN_04161	CNEDDIJH_01894	JLJGJGIB_01911
yhhW		Quercetin 2,3-dioxygenase	102	102	1	1	14439				695	755	696	DGJMBLJC_01897	HFDHOMNF_01950	ALEPGING_01757	GEOGNNEI_03920	BINKDPLB_03657	IPPPMGOG_04562	NCHKEDON_03339	PLMPIJHD_01717	LIBHOFBA_01526	MFAGDJPO_01698	AICMNGMC_01576	JAGDPAPJ_01719	JICHJFDH_03344	AHEHGMLM_03442	PABJNMJP_04683	MAPHOHON_02978	ONDKMJBG_03582	JDGDJJKN_03435	KLMHLHPE_02635	EGICBAEE_03600	LNEFCFII_03597	NILJAHBC_03294	KCIFOFJF_03530	CJCKLIFP_03261	IABBECJM_03304	LANDOHOG_03302	LOGCBOHO_02988	DKGFALGN_03487	PNFFMGCL_02709	BJCGHIIB_02513	NHHDDJBG_02323	LBLHELLM_02441	CGJPMKCI_02311	JOHJONHN_03126	CNEDDIJH_02991	JLJGJGIB_01778
deaD_2		ATP-dependent RNA helicase DeaD	102	102	1	1	13412				1355	1949	1883	DGJMBLJC_01581	HFDHOMNF_01196	ALEPGING_01338	GEOGNNEI_01855	BINKDPLB_01250	IPPPMGOG_03566	NCHKEDON_01426	PLMPIJHD_01780	LIBHOFBA_01589	MFAGDJPO_01761	AICMNGMC_01639	JAGDPAPJ_01782	JICHJFDH_02081	AHEHGMLM_04234	PABJNMJP_02375	MAPHOHON_03303	ONDKMJBG_03469	JDGDJJKN_01102	KLMHLHPE_04098	EGICBAEE_03833	LNEFCFII_03886	NILJAHBC_03904	KCIFOFJF_03819	CJCKLIFP_03606	IABBECJM_03649	LANDOHOG_03903	LOGCBOHO_03504	DKGFALGN_03550	PNFFMGCL_03265	BJCGHIIB_03494	NHHDDJBG_03506	LBLHELLM_03438	CGJPMKCI_03500	JOHJONHN_03740	CNEDDIJH_03262	JLJGJGIB_03431
mutS		DNA mismatch repair protein MutS	102	102	1	1	2058				677	2582	2545	DGJMBLJC_01375	HFDHOMNF_03519	ALEPGING_04394	GEOGNNEI_01379	BINKDPLB_00140	IPPPMGOG_01017	NCHKEDON_01317	PLMPIJHD_01173	LIBHOFBA_00983	MFAGDJPO_03151	AICMNGMC_01174	JAGDPAPJ_01317	JICHJFDH_00183	AHEHGMLM_02483	PABJNMJP_00311	MAPHOHON_02182	ONDKMJBG_00674	JDGDJJKN_01509	KLMHLHPE_01227	EGICBAEE_00883	LNEFCFII_01357	NILJAHBC_02002	KCIFOFJF_01869	CJCKLIFP_02145	IABBECJM_01360	LANDOHOG_01461	LOGCBOHO_01461	DKGFALGN_01486	PNFFMGCL_01543	BJCGHIIB_01021	NHHDDJBG_00140	LBLHELLM_00141	CGJPMKCI_01183	JOHJONHN_00937	CNEDDIJH_00695	JLJGJGIB_00645
yqiC		putative protein YqiC	102	102	1	1	13136				296	641	302	DGJMBLJC_03564	HFDHOMNF_01111	ALEPGING_02815	GEOGNNEI_01931	BINKDPLB_01326	IPPPMGOG_03490	NCHKEDON_01504	PLMPIJHD_01857	LIBHOFBA_01667	MFAGDJPO_01839	AICMNGMC_01717	JAGDPAPJ_01859	JICHJFDH_01211	AHEHGMLM_03728	PABJNMJP_02451	MAPHOHON_03379	ONDKMJBG_03393	JDGDJJKN_01217	KLMHLHPE_04022	EGICBAEE_03910	LNEFCFII_03809	NILJAHBC_03828	KCIFOFJF_03743	CJCKLIFP_03530	IABBECJM_03573	LANDOHOG_03827	LOGCBOHO_03428	DKGFALGN_03626	PNFFMGCL_03380	BJCGHIIB_03380	NHHDDJBG_03582	LBLHELLM_03362	CGJPMKCI_03576	JOHJONHN_03664	CNEDDIJH_03186	JLJGJGIB_03354
tolC_1		Outer membrane protein TolC	102	102	1	1	13115				1235	1478	1467	DGJMBLJC_03553	HFDHOMNF_03657	ALEPGING_00251	GEOGNNEI_01682	BINKDPLB_02355	IPPPMGOG_04151	NCHKEDON_01958	PLMPIJHD_01476	LIBHOFBA_01286	MFAGDJPO_03454	AICMNGMC_01477	JAGDPAPJ_01620	JICHJFDH_02983	AHEHGMLM_04270	PABJNMJP_00009	MAPHOHON_01880	ONDKMJBG_02838	JDGDJJKN_01227	KLMHLHPE_00924	EGICBAEE_00581	LNEFCFII_01661	NILJAHBC_04552	KCIFOFJF_04562	CJCKLIFP_04560	IABBECJM_04549	LANDOHOG_04558	LOGCBOHO_04561	DKGFALGN_01183	PNFFMGCL_01241	BJCGHIIB_00718	NHHDDJBG_00443	LBLHELLM_00444	CGJPMKCI_00880	JOHJONHN_00634	CNEDDIJH_00998	JLJGJGIB_04095
rhaS_3		HTH-type transcriptional activator RhaS	102	102	1	1	13080				917	920	917	DGJMBLJC_03526	HFDHOMNF_03683	ALEPGING_00724	GEOGNNEI_01658	BINKDPLB_02331	IPPPMGOG_04127	NCHKEDON_01934	PLMPIJHD_01452	LIBHOFBA_01262	MFAGDJPO_03430	AICMNGMC_01453	JAGDPAPJ_01596	JICHJFDH_03007	AHEHGMLM_04294	PABJNMJP_00033	MAPHOHON_01904	ONDKMJBG_02814	JDGDJJKN_01251	KLMHLHPE_00948	EGICBAEE_00605	LNEFCFII_01637	NILJAHBC_02282	KCIFOFJF_01589	CJCKLIFP_02425	IABBECJM_01639	LANDOHOG_01182	LOGCBOHO_01182	DKGFALGN_01207	PNFFMGCL_01265	BJCGHIIB_00742	NHHDDJBG_00419	LBLHELLM_00420	CGJPMKCI_00904	JOHJONHN_00658	CNEDDIJH_00974	JLJGJGIB_04071
proY		Proline-specific permease ProY	102	102	1	1	501				650	1532	1364	DGJMBLJC_04924	HFDHOMNF_04351	ALEPGING_03178	GEOGNNEI_04345	BINKDPLB_02884	IPPPMGOG_00421	NCHKEDON_03135	PLMPIJHD_04456	LIBHOFBA_04539	MFAGDJPO_04331	AICMNGMC_04264	JAGDPAPJ_04449	JICHJFDH_03460	AHEHGMLM_03151	PABJNMJP_02193	MAPHOHON_03071	ONDKMJBG_02495	JDGDJJKN_03664	KLMHLHPE_03260	EGICBAEE_02449	LNEFCFII_03270	NILJAHBC_02864	KCIFOFJF_02162	CJCKLIFP_02588	IABBECJM_02630	LANDOHOG_02626	LOGCBOHO_03269	DKGFALGN_02189	PNFFMGCL_02812	BJCGHIIB_02803	NHHDDJBG_02593	LBLHELLM_02818	CGJPMKCI_03060	JOHJONHN_02632	CNEDDIJH_02162	JLJGJGIB_02228
kefC_1		Glutathione-regulated potassium-efflux system protein KefC	102	102	1	1	10993				842	1874	1852	DGJMBLJC_04658	HFDHOMNF_02508	ALEPGING_01767	GEOGNNEI_03219	BINKDPLB_00495	IPPPMGOG_00095	NCHKEDON_01206	PLMPIJHD_03462	LIBHOFBA_03237	MFAGDJPO_02562	AICMNGMC_03483	JAGDPAPJ_03480	JICHJFDH_01511	AHEHGMLM_00163	PABJNMJP_04447	MAPHOHON_01705	ONDKMJBG_00368	JDGDJJKN_02359	KLMHLHPE_01649	EGICBAEE_01655	LNEFCFII_02258	NILJAHBC_01653	KCIFOFJF_01417	CJCKLIFP_01766	IABBECJM_02306	LANDOHOG_02305	LOGCBOHO_01883	DKGFALGN_01865	PNFFMGCL_02062	BJCGHIIB_01683	NHHDDJBG_01417	LBLHELLM_01369	CGJPMKCI_01673	JOHJONHN_01782	CNEDDIJH_01282	JLJGJGIB_01141
mdtM		Multidrug resistance protein MdtM	102	102	1	1	11362				707	1256	1235	DGJMBLJC_00145	HFDHOMNF_02343	ALEPGING_00785	GEOGNNEI_03067	BINKDPLB_01190	IPPPMGOG_04394	NCHKEDON_03505	PLMPIJHD_03310	LIBHOFBA_03085	MFAGDJPO_02410	AICMNGMC_03331	JAGDPAPJ_03328	JICHJFDH_02035	AHEHGMLM_00217	PABJNMJP_04243	MAPHOHON_01501	ONDKMJBG_00164	JDGDJJKN_02524	KLMHLHPE_01497	EGICBAEE_01807	LNEFCFII_02410	NILJAHBC_01501	KCIFOFJF_01265	CJCKLIFP_01918	IABBECJM_02154	LANDOHOG_02153	LOGCBOHO_01731	DKGFALGN_01713	PNFFMGCL_02316	BJCGHIIB_02154	NHHDDJBG_01129	LBLHELLM_01238	CGJPMKCI_02143	JOHJONHN_02340	CNEDDIJH_01752	JLJGJGIB_01600
ftsN		Cell division protein FtsN	102	102	1	1	15576				215	914	875	DGJMBLJC_00824	HFDHOMNF_01754	ALEPGING_01542	GEOGNNEI_02207	BINKDPLB_02260	IPPPMGOG_03610	NCHKEDON_03211	PLMPIJHD_02331	LIBHOFBA_02140	MFAGDJPO_02126	AICMNGMC_02251	JAGDPAPJ_02324	JICHJFDH_03932	AHEHGMLM_02402	PABJNMJP_04759	MAPHOHON_04334	ONDKMJBG_04514	JDGDJJKN_03922	KLMHLHPE_03793	EGICBAEE_04279	LNEFCFII_04299	NILJAHBC_04270	KCIFOFJF_04177	CJCKLIFP_04269	IABBECJM_04319	LANDOHOG_04266	LOGCBOHO_04317	DKGFALGN_04141	PNFFMGCL_02963	BJCGHIIB_03072	NHHDDJBG_03241	LBLHELLM_03136	CGJPMKCI_03376	JOHJONHN_03073	CNEDDIJH_03875	JLJGJGIB_04043
satP		Succinate-acetate/proton symporter SatP	102	102	1	1	11181				314	617	561	DGJMBLJC_00052	HFDHOMNF_02426	ALEPGING_02628	GEOGNNEI_03142	BINKDPLB_00418	IPPPMGOG_03280	NCHKEDON_03580	PLMPIJHD_03385	LIBHOFBA_03160	MFAGDJPO_02485	AICMNGMC_03406	JAGDPAPJ_03403	JICHJFDH_02179	AHEHGMLM_03302	PABJNMJP_04370	MAPHOHON_01628	ONDKMJBG_00291	JDGDJJKN_02435	KLMHLHPE_01572	EGICBAEE_01732	LNEFCFII_02335	NILJAHBC_01576	KCIFOFJF_01340	CJCKLIFP_01843	IABBECJM_02229	LANDOHOG_02228	LOGCBOHO_01806	DKGFALGN_01788	PNFFMGCL_02391	BJCGHIIB_02078	NHHDDJBG_01204	LBLHELLM_01163	CGJPMKCI_02068	JOHJONHN_02265	CNEDDIJH_01677	JLJGJGIB_01525
group_3878		hypothetical protein	102	102	1	1	11217				167	488	484	DGJMBLJC_00076	HFDHOMNF_02401	ALEPGING_02648	GEOGNNEI_03122	BINKDPLB_00398	IPPPMGOG_03300	NCHKEDON_03560	PLMPIJHD_03365	LIBHOFBA_03140	MFAGDJPO_02465	AICMNGMC_03386	JAGDPAPJ_03383	JICHJFDH_02199	AHEHGMLM_03322	PABJNMJP_04350	MAPHOHON_01608	ONDKMJBG_00271	JDGDJJKN_02455	KLMHLHPE_01552	EGICBAEE_01752	LNEFCFII_02355	NILJAHBC_01556	KCIFOFJF_01320	CJCKLIFP_01863	IABBECJM_02209	LANDOHOG_02208	LOGCBOHO_01786	DKGFALGN_01768	PNFFMGCL_02371	BJCGHIIB_02098	NHHDDJBG_01184	LBLHELLM_01183	CGJPMKCI_02088	JOHJONHN_02285	CNEDDIJH_01697	JLJGJGIB_01545
group_3888		hypothetical protein	102	102	1	1	11363				1271	1316	1271	DGJMBLJC_00146	HFDHOMNF_02342	ALEPGING_00786	GEOGNNEI_03066	BINKDPLB_01189	IPPPMGOG_04395	NCHKEDON_03504	PLMPIJHD_03309	LIBHOFBA_03084	MFAGDJPO_02409	AICMNGMC_03330	JAGDPAPJ_03327	JICHJFDH_02036	AHEHGMLM_00218	PABJNMJP_04242	MAPHOHON_01500	ONDKMJBG_00163	JDGDJJKN_02525	KLMHLHPE_01496	EGICBAEE_01808	LNEFCFII_02411	NILJAHBC_01500	KCIFOFJF_01264	CJCKLIFP_01919	IABBECJM_02153	LANDOHOG_02152	LOGCBOHO_01730	DKGFALGN_01712	PNFFMGCL_02315	BJCGHIIB_02155	NHHDDJBG_01128	LBLHELLM_01239	CGJPMKCI_02144	JOHJONHN_02341	CNEDDIJH_01753	JLJGJGIB_01601
lldR_1		Putative L-lactate dehydrogenase operon regulatory protein	102	102	1	1	11385				575	782	724	DGJMBLJC_00156	HFDHOMNF_02332	ALEPGING_00795	GEOGNNEI_03057	BINKDPLB_01180	IPPPMGOG_04404	NCHKEDON_03495	PLMPIJHD_03300	LIBHOFBA_03075	MFAGDJPO_02400	AICMNGMC_03321	JAGDPAPJ_03318	JICHJFDH_02045	AHEHGMLM_00228	PABJNMJP_04233	MAPHOHON_01491	ONDKMJBG_00154	JDGDJJKN_02534	KLMHLHPE_01487	EGICBAEE_01817	LNEFCFII_02420	NILJAHBC_01491	KCIFOFJF_01255	CJCKLIFP_01928	IABBECJM_02144	LANDOHOG_02143	LOGCBOHO_01721	DKGFALGN_01703	PNFFMGCL_02306	BJCGHIIB_02164	NHHDDJBG_01119	LBLHELLM_01248	CGJPMKCI_02153	JOHJONHN_02350	CNEDDIJH_01762	JLJGJGIB_01610
group_3896		hypothetical protein	102	102	1	1	16230				329	329	329	DGJMBLJC_00222	HFDHOMNF_02265	ALEPGING_00312	GEOGNNEI_02997	BINKDPLB_01120	IPPPMGOG_04464	NCHKEDON_03435	PLMPIJHD_03240	LIBHOFBA_03015	MFAGDJPO_02340	AICMNGMC_03261	JAGDPAPJ_03258	JICHJFDH_02444	AHEHGMLM_02051	PABJNMJP_04173	MAPHOHON_01431	ONDKMJBG_00094	JDGDJJKN_02606	KLMHLHPE_01427	EGICBAEE_01877	LNEFCFII_02480	NILJAHBC_01431	KCIFOFJF_01195	CJCKLIFP_01988	IABBECJM_02084	LANDOHOG_02083	LOGCBOHO_01661	DKGFALGN_01643	PNFFMGCL_02246	BJCGHIIB_02224	NHHDDJBG_01046	LBLHELLM_01321	CGJPMKCI_02213	JOHJONHN_02410	CNEDDIJH_01822	JLJGJGIB_01670
group_3897		hypothetical protein	102	102	1	1	16227				329	557	548	DGJMBLJC_00226	HFDHOMNF_02262	ALEPGING_00309	GEOGNNEI_02994	BINKDPLB_01117	IPPPMGOG_04467	NCHKEDON_03432	PLMPIJHD_03237	LIBHOFBA_03012	MFAGDJPO_02337	AICMNGMC_03258	JAGDPAPJ_03255	JICHJFDH_02447	AHEHGMLM_02054	PABJNMJP_04170	MAPHOHON_01428	ONDKMJBG_00091	JDGDJJKN_02609	KLMHLHPE_01424	EGICBAEE_01880	LNEFCFII_02483	NILJAHBC_01428	KCIFOFJF_01192	CJCKLIFP_01991	IABBECJM_02081	LANDOHOG_02080	LOGCBOHO_01658	DKGFALGN_01640	PNFFMGCL_02243	BJCGHIIB_02227	NHHDDJBG_01043	LBLHELLM_01324	CGJPMKCI_02216	JOHJONHN_02413	CNEDDIJH_01825	JLJGJGIB_01673
ulaF		L-ribulose-5-phosphate 4-epimerase UlaF	102	102	1	1	16152				686	686	686	DGJMBLJC_00278	HFDHOMNF_02153	ALEPGING_00366	GEOGNNEI_03427	BINKDPLB_04334	IPPPMGOG_02880	NCHKEDON_04391	PLMPIJHD_03701	LIBHOFBA_03791	MFAGDJPO_03511	AICMNGMC_03701	JAGDPAPJ_03702	JICHJFDH_02751	AHEHGMLM_01758	PABJNMJP_00653	MAPHOHON_01380	ONDKMJBG_02125	JDGDJJKN_02656	KLMHLHPE_03580	EGICBAEE_02639	LNEFCFII_02530	NILJAHBC_01380	KCIFOFJF_02802	CJCKLIFP_02775	IABBECJM_02989	LANDOHOG_02987	LOGCBOHO_02503	DKGFALGN_03073	PNFFMGCL_03414	BJCGHIIB_04007	NHHDDJBG_03879	LBLHELLM_03645	CGJPMKCI_03828	JOHJONHN_04124	CNEDDIJH_03947	JLJGJGIB_03639
miaA		tRNA dimethylallyltransferase	102	102	1	1	16108				899	950	948	DGJMBLJC_00307	HFDHOMNF_02185	ALEPGING_01986	GEOGNNEI_03456	BINKDPLB_04363	IPPPMGOG_02909	NCHKEDON_04362	PLMPIJHD_03730	LIBHOFBA_03820	MFAGDJPO_03540	AICMNGMC_03730	JAGDPAPJ_03731	JICHJFDH_02722	AHEHGMLM_01787	PABJNMJP_00624	MAPHOHON_01351	ONDKMJBG_02154	JDGDJJKN_02684	KLMHLHPE_03609	EGICBAEE_02668	LNEFCFII_02559	NILJAHBC_01351	KCIFOFJF_02773	CJCKLIFP_02804	IABBECJM_02960	LANDOHOG_02958	LOGCBOHO_02532	DKGFALGN_03044	PNFFMGCL_03443	BJCGHIIB_04036	NHHDDJBG_03908	LBLHELLM_03616	CGJPMKCI_03857	JOHJONHN_04153	CNEDDIJH_03976	JLJGJGIB_03610
epmA		Elongation factor P--(R)-beta-lysine ligase	102	102	1	1	16092				761	977	974	DGJMBLJC_00323	HFDHOMNF_04330	ALEPGING_01972	GEOGNNEI_03472	BINKDPLB_04379	IPPPMGOG_02925	NCHKEDON_04346	PLMPIJHD_03746	LIBHOFBA_03836	MFAGDJPO_03556	AICMNGMC_03746	JAGDPAPJ_03747	JICHJFDH_02706	AHEHGMLM_01803	PABJNMJP_00608	MAPHOHON_01335	ONDKMJBG_02170	JDGDJJKN_02700	KLMHLHPE_03625	EGICBAEE_02684	LNEFCFII_02575	NILJAHBC_01335	KCIFOFJF_02757	CJCKLIFP_02820	IABBECJM_02944	LANDOHOG_02942	LOGCBOHO_02548	DKGFALGN_03028	PNFFMGCL_03459	BJCGHIIB_03829	NHHDDJBG_02421	LBLHELLM_02528	CGJPMKCI_02409	JOHJONHN_04207	CNEDDIJH_01847	JLJGJGIB_01865
frdB		Fumarate reductase iron-sulfur subunit	102	102	1	1	16090				704	734	733	DGJMBLJC_00325	HFDHOMNF_04328	ALEPGING_01970	GEOGNNEI_03474	BINKDPLB_04381	IPPPMGOG_02927	NCHKEDON_04344	PLMPIJHD_03748	LIBHOFBA_03838	MFAGDJPO_03558	AICMNGMC_03748	JAGDPAPJ_03749	JICHJFDH_02704	AHEHGMLM_01805	PABJNMJP_00606	MAPHOHON_01333	ONDKMJBG_02172	JDGDJJKN_02702	KLMHLHPE_03627	EGICBAEE_02686	LNEFCFII_02577	NILJAHBC_01333	KCIFOFJF_02755	CJCKLIFP_02822	IABBECJM_02942	LANDOHOG_02940	LOGCBOHO_02550	DKGFALGN_03026	PNFFMGCL_03461	BJCGHIIB_03827	NHHDDJBG_02423	LBLHELLM_02530	CGJPMKCI_02411	JOHJONHN_04205	CNEDDIJH_01849	JLJGJGIB_01867
epmB		L-lysine 2,3-aminomutase	102	102	1	1	16079				1028	1028	1028	DGJMBLJC_00333	HFDHOMNF_04320	ALEPGING_01962	GEOGNNEI_03481	BINKDPLB_04388	IPPPMGOG_02934	NCHKEDON_04337	PLMPIJHD_03755	LIBHOFBA_03845	MFAGDJPO_03565	AICMNGMC_03755	JAGDPAPJ_03756	JICHJFDH_02696	AHEHGMLM_01812	PABJNMJP_00599	MAPHOHON_01326	ONDKMJBG_02179	JDGDJJKN_02709	KLMHLHPE_03634	EGICBAEE_02693	LNEFCFII_02584	NILJAHBC_01326	KCIFOFJF_02748	CJCKLIFP_02829	IABBECJM_02935	LANDOHOG_02933	LOGCBOHO_02557	DKGFALGN_03019	PNFFMGCL_03469	BJCGHIIB_03820	NHHDDJBG_02431	LBLHELLM_02538	CGJPMKCI_02419	JOHJONHN_04198	CNEDDIJH_01856	JLJGJGIB_01874
melR		Melibiose operon regulatory protein	102	102	1	1	15977				632	932	929	DGJMBLJC_00473	HFDHOMNF_04283	ALEPGING_01428	GEOGNNEI_03515	BINKDPLB_04423	IPPPMGOG_02968	NCHKEDON_04302	PLMPIJHD_03790	LIBHOFBA_03880	MFAGDJPO_03600	AICMNGMC_03789	JAGDPAPJ_03791	JICHJFDH_04066	AHEHGMLM_01847	PABJNMJP_00565	MAPHOHON_01292	ONDKMJBG_02213	JDGDJJKN_03870	KLMHLHPE_03668	EGICBAEE_02727	LNEFCFII_02618	NILJAHBC_01291	KCIFOFJF_02714	CJCKLIFP_02864	IABBECJM_02900	LANDOHOG_02898	LOGCBOHO_02591	DKGFALGN_02985	PNFFMGCL_03504	BJCGHIIB_03786	NHHDDJBG_02465	LBLHELLM_02572	CGJPMKCI_02453	JOHJONHN_04164	CNEDDIJH_01891	JLJGJGIB_01908
basR		Transcriptional regulatory protein BasR	102	102	1	1	15969				347	668	661	DGJMBLJC_00479	HFDHOMNF_04278	ALEPGING_01433	GEOGNNEI_03520	BINKDPLB_04428	IPPPMGOG_02973	NCHKEDON_04297	PLMPIJHD_03795	LIBHOFBA_03885	MFAGDJPO_03605	AICMNGMC_03794	JAGDPAPJ_03796	JICHJFDH_04073	AHEHGMLM_01852	PABJNMJP_00560	MAPHOHON_01287	ONDKMJBG_02218	JDGDJJKN_03865	KLMHLHPE_03673	EGICBAEE_02732	LNEFCFII_02623	NILJAHBC_01286	KCIFOFJF_02709	CJCKLIFP_02869	IABBECJM_02895	LANDOHOG_02893	LOGCBOHO_02596	DKGFALGN_02980	PNFFMGCL_04360	BJCGHIIB_03781	NHHDDJBG_02470	LBLHELLM_02577	CGJPMKCI_02458	JOHJONHN_04159	CNEDDIJH_01896	JLJGJGIB_01913
yfcG_1		hypothetical protein	102	102	1	1	15895				92	668	656	DGJMBLJC_00517	HFDHOMNF_04248	ALEPGING_01460	GEOGNNEI_03547	BINKDPLB_04455	IPPPMGOG_03000	NCHKEDON_04270	PLMPIJHD_03822	LIBHOFBA_03912	MFAGDJPO_03632	AICMNGMC_03821	JAGDPAPJ_03823	JICHJFDH_04105	AHEHGMLM_01879	PABJNMJP_00533	MAPHOHON_01260	ONDKMJBG_02245	JDGDJJKN_03839	KLMHLHPE_03894	EGICBAEE_02759	LNEFCFII_02650	NILJAHBC_01259	KCIFOFJF_02682	CJCKLIFP_02896	IABBECJM_02868	LANDOHOG_02866	LOGCBOHO_02623	DKGFALGN_02953	PNFFMGCL_03711	BJCGHIIB_03524	NHHDDJBG_02497	LBLHELLM_02605	CGJPMKCI_02485	JOHJONHN_03300	CNEDDIJH_01923	JLJGJGIB_01940
alr		Alanine racemase, biosynthetic	102	102	1	1	15796				1019	1079	1078	DGJMBLJC_00551	HFDHOMNF_04218	ALEPGING_01797	GEOGNNEI_03566	BINKDPLB_01487	IPPPMGOG_03019	NCHKEDON_04251	PLMPIJHD_03841	LIBHOFBA_03931	MFAGDJPO_03651	AICMNGMC_03840	JAGDPAPJ_03842	JICHJFDH_04124	AHEHGMLM_01898	PABJNMJP_00514	MAPHOHON_01241	ONDKMJBG_02264	JDGDJJKN_03820	KLMHLHPE_03875	EGICBAEE_02778	LNEFCFII_02669	NILJAHBC_01240	KCIFOFJF_02663	CJCKLIFP_02915	IABBECJM_02849	LANDOHOG_02847	LOGCBOHO_02642	DKGFALGN_04037	PNFFMGCL_03692	BJCGHIIB_03543	NHHDDJBG_02516	LBLHELLM_02624	CGJPMKCI_02504	JOHJONHN_03281	CNEDDIJH_01942	JLJGJGIB_01959
qorA		Quinone oxidoreductase 1	102	102	1	1	15793				983	983	983	DGJMBLJC_00553	HFDHOMNF_04215	ALEPGING_01795	GEOGNNEI_03568	BINKDPLB_01485	IPPPMGOG_03021	NCHKEDON_04249	PLMPIJHD_03843	LIBHOFBA_03933	MFAGDJPO_03653	AICMNGMC_03842	JAGDPAPJ_03844	JICHJFDH_04126	AHEHGMLM_01900	PABJNMJP_00512	MAPHOHON_01239	ONDKMJBG_02266	JDGDJJKN_03818	KLMHLHPE_03873	EGICBAEE_02780	LNEFCFII_02671	NILJAHBC_01238	KCIFOFJF_02661	CJCKLIFP_02917	IABBECJM_02847	LANDOHOG_02845	LOGCBOHO_02644	DKGFALGN_04039	PNFFMGCL_03690	BJCGHIIB_03545	NHHDDJBG_02518	LBLHELLM_02626	CGJPMKCI_02506	JOHJONHN_03279	CNEDDIJH_01944	JLJGJGIB_01962
zur		Zinc uptake regulation protein	102	102	1	1	15786				515	515	515	DGJMBLJC_00557	HFDHOMNF_04211	ALEPGING_01791	GEOGNNEI_03572	BINKDPLB_01481	IPPPMGOG_03901	NCHKEDON_04245	PLMPIJHD_03847	LIBHOFBA_03937	MFAGDJPO_03657	AICMNGMC_03846	JAGDPAPJ_03848	JICHJFDH_04130	AHEHGMLM_01904	PABJNMJP_00508	MAPHOHON_01235	ONDKMJBG_02270	JDGDJJKN_03814	KLMHLHPE_03869	EGICBAEE_02784	LNEFCFII_02675	NILJAHBC_01234	KCIFOFJF_02657	CJCKLIFP_02921	IABBECJM_02843	LANDOHOG_02841	LOGCBOHO_02648	DKGFALGN_04043	PNFFMGCL_03686	BJCGHIIB_03549	NHHDDJBG_02522	LBLHELLM_02630	CGJPMKCI_02510	JOHJONHN_03275	CNEDDIJH_01948	JLJGJGIB_01966
group_3948		hypothetical protein	102	102	1	1	15766				389	2096	2079	DGJMBLJC_00574	HFDHOMNF_04194	ALEPGING_03763	GEOGNNEI_03588	BINKDPLB_01465	IPPPMGOG_03917	NCHKEDON_04230	PLMPIJHD_03862	LIBHOFBA_03952	MFAGDJPO_03672	AICMNGMC_03862	JAGDPAPJ_03863	JICHJFDH_04146	AHEHGMLM_01919	PABJNMJP_00493	MAPHOHON_01219	ONDKMJBG_02285	JDGDJJKN_03798	KLMHLHPE_03853	EGICBAEE_02799	LNEFCFII_02690	NILJAHBC_01219	KCIFOFJF_02641	CJCKLIFP_02936	IABBECJM_02827	LANDOHOG_02826	LOGCBOHO_02663	DKGFALGN_04059	PNFFMGCL_03670	BJCGHIIB_03565	NHHDDJBG_02538	LBLHELLM_02646	CGJPMKCI_02526	JOHJONHN_03259	CNEDDIJH_01963	JLJGJGIB_01981
iclR		Transcriptional repressor IclR	102	102	1	1	15713				824	824	824	DGJMBLJC_00613	HFDHOMNF_04156	ALEPGING_02511	GEOGNNEI_03624	BINKDPLB_01429	IPPPMGOG_03953	NCHKEDON_04194	PLMPIJHD_03898	LIBHOFBA_03988	MFAGDJPO_03708	AICMNGMC_03898	JAGDPAPJ_03899	JICHJFDH_04182	AHEHGMLM_01955	PABJNMJP_00457	MAPHOHON_01183	ONDKMJBG_02321	JDGDJJKN_03762	KLMHLHPE_03817	EGICBAEE_02835	LNEFCFII_02726	NILJAHBC_01183	KCIFOFJF_02605	CJCKLIFP_02972	IABBECJM_02791	LANDOHOG_02790	LOGCBOHO_02699	DKGFALGN_04095	PNFFMGCL_03634	BJCGHIIB_03601	NHHDDJBG_02574	LBLHELLM_02682	CGJPMKCI_02562	JOHJONHN_03223	CNEDDIJH_01999	JLJGJGIB_02017
citF_2		Citrate lyase alpha chain	102	102	1	1	4903				1433	1529	1528	DGJMBLJC_00623	HFDHOMNF_03214	ALEPGING_00066	GEOGNNEI_04055	BINKDPLB_03810	IPPPMGOG_03100	NCHKEDON_04575	PLMPIJHD_04165	LIBHOFBA_04248	MFAGDJPO_04040	AICMNGMC_03968	JAGDPAPJ_04159	JICHJFDH_02903	AHEHGMLM_00301	PABJNMJP_02782	MAPHOHON_03738	ONDKMJBG_03756	JDGDJJKN_00834	KLMHLHPE_02859	EGICBAEE_03371	LNEFCFII_02980	NILJAHBC_03517	KCIFOFJF_03159	CJCKLIFP_03474	IABBECJM_03439	LANDOHOG_03437	LOGCBOHO_03201	DKGFALGN_02802	PNFFMGCL_03562	BJCGHIIB_02658	NHHDDJBG_03316	LBLHELLM_01687	CGJPMKCI_02702	JOHJONHN_03381	CNEDDIJH_03987	JLJGJGIB_03726
entH		Proofreading thioesterase EntH	102	102	1	1	4845				413	413	413	DGJMBLJC_00646	HFDHOMNF_03237	ALEPGING_00088	GEOGNNEI_04033	BINKDPLB_03788	IPPPMGOG_03078	NCHKEDON_04553	PLMPIJHD_04143	LIBHOFBA_04226	MFAGDJPO_04018	AICMNGMC_03946	JAGDPAPJ_04137	JICHJFDH_02881	AHEHGMLM_00323	PABJNMJP_02760	MAPHOHON_03760	ONDKMJBG_03778	JDGDJJKN_00856	KLMHLHPE_02881	EGICBAEE_03393	LNEFCFII_02958	NILJAHBC_03539	KCIFOFJF_03181	CJCKLIFP_03496	IABBECJM_03417	LANDOHOG_03415	LOGCBOHO_03223	DKGFALGN_02780	PNFFMGCL_03540	BJCGHIIB_02636	NHHDDJBG_03294	LBLHELLM_01709	CGJPMKCI_02724	JOHJONHN_03359	CNEDDIJH_04009	JLJGJGIB_03704
entB		Enterobactin synthase component B	102	102	1	1	4842				857	857	857	DGJMBLJC_00648	HFDHOMNF_03239	ALEPGING_00090	GEOGNNEI_04031	BINKDPLB_03786	IPPPMGOG_03076	NCHKEDON_04551	PLMPIJHD_04141	LIBHOFBA_04224	MFAGDJPO_04016	AICMNGMC_03944	JAGDPAPJ_04135	JICHJFDH_02879	AHEHGMLM_00325	PABJNMJP_02758	MAPHOHON_03762	ONDKMJBG_03780	JDGDJJKN_00858	KLMHLHPE_02883	EGICBAEE_03395	LNEFCFII_02956	NILJAHBC_03541	KCIFOFJF_03183	CJCKLIFP_03498	IABBECJM_03415	LANDOHOG_03413	LOGCBOHO_03225	DKGFALGN_02778	PNFFMGCL_03538	BJCGHIIB_02634	NHHDDJBG_03292	LBLHELLM_01711	CGJPMKCI_02726	JOHJONHN_03357	CNEDDIJH_04011	JLJGJGIB_03702
entC		Isochorismate synthase EntC	102	102	1	1	4840				1175	1175	1175	DGJMBLJC_00650	HFDHOMNF_03241	ALEPGING_00092	GEOGNNEI_04029	BINKDPLB_03784	IPPPMGOG_03074	NCHKEDON_04549	PLMPIJHD_04139	LIBHOFBA_04222	MFAGDJPO_04014	AICMNGMC_03942	JAGDPAPJ_04133	JICHJFDH_02877	AHEHGMLM_00327	PABJNMJP_02756	MAPHOHON_03764	ONDKMJBG_03782	JDGDJJKN_00860	KLMHLHPE_02885	EGICBAEE_03397	LNEFCFII_02954	NILJAHBC_03543	KCIFOFJF_03185	CJCKLIFP_03500	IABBECJM_03413	LANDOHOG_03411	LOGCBOHO_03227	DKGFALGN_02776	PNFFMGCL_03536	BJCGHIIB_02632	NHHDDJBG_03290	LBLHELLM_01713	CGJPMKCI_02728	JOHJONHN_03355	CNEDDIJH_04013	JLJGJGIB_03700
fepG		Ferric enterobactin transport system permease protein FepG	102	102	1	1	4835				989	992	989	DGJMBLJC_00654	HFDHOMNF_03245	ALEPGING_04329	GEOGNNEI_04025	BINKDPLB_03780	IPPPMGOG_03070	NCHKEDON_04545	PLMPIJHD_04135	LIBHOFBA_04218	MFAGDJPO_04010	AICMNGMC_03938	JAGDPAPJ_04129	JICHJFDH_02873	AHEHGMLM_00331	PABJNMJP_02752	MAPHOHON_03768	ONDKMJBG_03786	JDGDJJKN_00864	KLMHLHPE_02889	EGICBAEE_03401	LNEFCFII_02950	NILJAHBC_03547	KCIFOFJF_03189	CJCKLIFP_03504	IABBECJM_03409	LANDOHOG_03407	LOGCBOHO_03231	DKGFALGN_02772	PNFFMGCL_03532	BJCGHIIB_02628	NHHDDJBG_03286	LBLHELLM_01717	CGJPMKCI_02732	JOHJONHN_03351	CNEDDIJH_04017	JLJGJGIB_03696
group_3987		hypothetical protein	102	102	1	1	347				383	770	766	DGJMBLJC_00735	HFDHOMNF_01621	ALEPGING_00446	GEOGNNEI_01739	BINKDPLB_02412	IPPPMGOG_00528	NCHKEDON_02972	PLMPIJHD_01533	LIBHOFBA_01343	MFAGDJPO_01514	AICMNGMC_04591	JAGDPAPJ_04644	JICHJFDH_00258	AHEHGMLM_03549	PABJNMJP_01942	MAPHOHON_03564	ONDKMJBG_04421	JDGDJJKN_00951	KLMHLHPE_03500	EGICBAEE_02343	LNEFCFII_03509	NILJAHBC_02758	KCIFOFJF_02057	CJCKLIFP_02694	IABBECJM_02736	LANDOHOG_02520	LOGCBOHO_03805	DKGFALGN_02295	PNFFMGCL_03195	BJCGHIIB_03286	NHHDDJBG_02961	LBLHELLM_03021	CGJPMKCI_03307	JOHJONHN_02881	CNEDDIJH_02859	JLJGJGIB_02881
ybaL		Putative cation/proton antiporter YbaL	102	102	1	1	363				1676	1886	1678	DGJMBLJC_00750	HFDHOMNF_01635	ALEPGING_02671	GEOGNNEI_01752	BINKDPLB_01695	IPPPMGOG_00515	NCHKEDON_02985	PLMPIJHD_01546	LIBHOFBA_01356	MFAGDJPO_01527	AICMNGMC_04604	JAGDPAPJ_04657	JICHJFDH_00245	AHEHGMLM_03562	PABJNMJP_01955	MAPHOHON_03577	ONDKMJBG_04408	JDGDJJKN_03754	KLMHLHPE_03487	EGICBAEE_02356	LNEFCFII_03496	NILJAHBC_02771	KCIFOFJF_02070	CJCKLIFP_02681	IABBECJM_02723	LANDOHOG_02533	LOGCBOHO_03792	DKGFALGN_02282	PNFFMGCL_03182	BJCGHIIB_03299	NHHDDJBG_02948	LBLHELLM_03034	CGJPMKCI_03294	JOHJONHN_02868	CNEDDIJH_02872	JLJGJGIB_02894
recR		Recombination protein RecR	102	102	1	1	371				524	605	604	DGJMBLJC_00758	HFDHOMNF_01641	ALEPGING_02665	GEOGNNEI_01758	BINKDPLB_01701	IPPPMGOG_00509	NCHKEDON_02991	PLMPIJHD_01552	LIBHOFBA_01362	MFAGDJPO_01533	AICMNGMC_04610	JAGDPAPJ_04663	JICHJFDH_00239	AHEHGMLM_03568	PABJNMJP_01961	MAPHOHON_03583	ONDKMJBG_04402	JDGDJJKN_03748	KLMHLHPE_03481	EGICBAEE_02362	LNEFCFII_03490	NILJAHBC_02777	KCIFOFJF_02076	CJCKLIFP_02675	IABBECJM_02717	LANDOHOG_02539	LOGCBOHO_03786	DKGFALGN_02276	PNFFMGCL_03176	BJCGHIIB_03305	NHHDDJBG_02942	LBLHELLM_03040	CGJPMKCI_03288	JOHJONHN_02862	CNEDDIJH_02878	JLJGJGIB_02900
ylaC		Inner membrane protein YlaC	102	102	1	1	395				365	470	468	DGJMBLJC_00774	HFDHOMNF_01659	ALEPGING_00574	GEOGNNEI_01774	BINKDPLB_01717	IPPPMGOG_00493	NCHKEDON_03007	PLMPIJHD_01568	LIBHOFBA_01378	MFAGDJPO_01549	AICMNGMC_04626	JAGDPAPJ_04680	JICHJFDH_00223	AHEHGMLM_03584	PABJNMJP_01977	MAPHOHON_03599	ONDKMJBG_04386	JDGDJJKN_03733	KLMHLHPE_03465	EGICBAEE_02378	LNEFCFII_03474	NILJAHBC_02793	KCIFOFJF_02091	CJCKLIFP_02659	IABBECJM_02701	LANDOHOG_02555	LOGCBOHO_03770	DKGFALGN_02260	PNFFMGCL_03160	BJCGHIIB_03321	NHHDDJBG_02926	LBLHELLM_03056	CGJPMKCI_03272	JOHJONHN_02846	CNEDDIJH_02894	JLJGJGIB_02916
rpmE2		50S ribosomal protein L31 type B	102	102	1	1	398				260	260	260	DGJMBLJC_00775	HFDHOMNF_01661	ALEPGING_00572	GEOGNNEI_01776	BINKDPLB_01719	IPPPMGOG_00491	NCHKEDON_03009	PLMPIJHD_01570	LIBHOFBA_01380	MFAGDJPO_01551	AICMNGMC_04628	JAGDPAPJ_04682	JICHJFDH_00221	AHEHGMLM_03586	PABJNMJP_01979	MAPHOHON_03601	ONDKMJBG_04384	JDGDJJKN_03732	KLMHLHPE_03463	EGICBAEE_02380	LNEFCFII_03472	NILJAHBC_02795	KCIFOFJF_02093	CJCKLIFP_02657	IABBECJM_02699	LANDOHOG_02557	LOGCBOHO_03768	DKGFALGN_02258	PNFFMGCL_03158	BJCGHIIB_03323	NHHDDJBG_02924	LBLHELLM_03058	CGJPMKCI_03270	JOHJONHN_02844	CNEDDIJH_02896	JLJGJGIB_02918
sutR_2		HTH-type transcriptional regulator SutR	102	102	1	1	15435				296	599	546	DGJMBLJC_00868	HFDHOMNF_01806	ALEPGING_01144	GEOGNNEI_01985	BINKDPLB_01643	IPPPMGOG_03660	NCHKEDON_02075	PLMPIJHD_02025	LIBHOFBA_01833	MFAGDJPO_01892	AICMNGMC_01866	JAGDPAPJ_02025	JICHJFDH_03982	AHEHGMLM_02544	PABJNMJP_03025	MAPHOHON_03934	ONDKMJBG_02431	JDGDJJKN_03972	KLMHLHPE_03743	EGICBAEE_03963	LNEFCFII_04075	NILJAHBC_04092	KCIFOFJF_04007	CJCKLIFP_04101	IABBECJM_04144	LANDOHOG_04091	LOGCBOHO_04139	DKGFALGN_03679	PNFFMGCL_03051	BJCGHIIB_02984	NHHDDJBG_03191	LBLHELLM_03186	CGJPMKCI_03426	JOHJONHN_02981	CNEDDIJH_03449	JLJGJGIB_03283
group_4015		hypothetical protein	102	102	1	1	15434				521	764	658	DGJMBLJC_00869	HFDHOMNF_01807	ALEPGING_01143	GEOGNNEI_01984	BINKDPLB_01642	IPPPMGOG_03661	NCHKEDON_02076	PLMPIJHD_02026	LIBHOFBA_01834	MFAGDJPO_01893	AICMNGMC_01867	JAGDPAPJ_02026	JICHJFDH_03983	AHEHGMLM_02545	PABJNMJP_03024	MAPHOHON_03933	ONDKMJBG_02432	JDGDJJKN_03973	KLMHLHPE_03742	EGICBAEE_03962	LNEFCFII_04074	NILJAHBC_04091	KCIFOFJF_04008	CJCKLIFP_04100	IABBECJM_04143	LANDOHOG_04090	LOGCBOHO_04138	DKGFALGN_03678	PNFFMGCL_03052	BJCGHIIB_02983	NHHDDJBG_03190	LBLHELLM_03187	CGJPMKCI_03427	JOHJONHN_02980	CNEDDIJH_03448	JLJGJGIB_03282
fdhE		Protein FdhE	102	102	1	1	15415				731	929	927	DGJMBLJC_00880	HFDHOMNF_01816	ALEPGING_02925	GEOGNNEI_01975	BINKDPLB_01633	IPPPMGOG_03670	NCHKEDON_02085	PLMPIJHD_02035	LIBHOFBA_01843	MFAGDJPO_01902	AICMNGMC_01876	JAGDPAPJ_02035	JICHJFDH_03992	AHEHGMLM_02554	PABJNMJP_03015	MAPHOHON_03924	ONDKMJBG_02441	JDGDJJKN_03982	KLMHLHPE_03733	EGICBAEE_03953	LNEFCFII_04065	NILJAHBC_04082	KCIFOFJF_04017	CJCKLIFP_04091	IABBECJM_04134	LANDOHOG_04081	LOGCBOHO_04129	DKGFALGN_03669	PNFFMGCL_03061	BJCGHIIB_02974	NHHDDJBG_03181	LBLHELLM_03196	CGJPMKCI_03436	JOHJONHN_02971	CNEDDIJH_03439	JLJGJGIB_03273
guaB		Inosine-5'-monophosphate dehydrogenase	102	102	1	1	10521				287	1466	1449	DGJMBLJC_00929	HFDHOMNF_02993	ALEPGING_01125	GEOGNNEI_02777	BINKDPLB_01905	IPPPMGOG_00837	NCHKEDON_00945	PLMPIJHD_02745	LIBHOFBA_02557	MFAGDJPO_01365	AICMNGMC_02865	JAGDPAPJ_02800	JICHJFDH_03554	AHEHGMLM_02765	PABJNMJP_04048	MAPHOHON_02367	ONDKMJBG_03178	JDGDJJKN_03076	KLMHLHPE_02269	EGICBAEE_01396	LNEFCFII_01999	NILJAHBC_02381	KCIFOFJF_03307	CJCKLIFP_01506	IABBECJM_01738	LANDOHOG_01972	LOGCBOHO_02143	DKGFALGN_02463	PNFFMGCL_01775	BJCGHIIB_01939	NHHDDJBG_01745	LBLHELLM_00986	CGJPMKCI_01932	JOHJONHN_02140	CNEDDIJH_01538	JLJGJGIB_01400
group_4027		hypothetical protein	102	102	1	1	10565				290	620	616	DGJMBLJC_00946	HFDHOMNF_02980	ALEPGING_00810	GEOGNNEI_02787	BINKDPLB_01915	IPPPMGOG_01396	NCHKEDON_00955	PLMPIJHD_02755	LIBHOFBA_02567	MFAGDJPO_01375	AICMNGMC_02875	JAGDPAPJ_02810	JICHJFDH_03543	AHEHGMLM_02151	PABJNMJP_04058	MAPHOHON_03875	ONDKMJBG_03190	JDGDJJKN_03085	KLMHLHPE_02279	EGICBAEE_01406	LNEFCFII_02009	NILJAHBC_02370	KCIFOFJF_03296	CJCKLIFP_01517	IABBECJM_01727	LANDOHOG_01983	LOGCBOHO_02132	DKGFALGN_02473	PNFFMGCL_01765	BJCGHIIB_01949	NHHDDJBG_01755	LBLHELLM_00976	CGJPMKCI_01922	JOHJONHN_02130	CNEDDIJH_01548	JLJGJGIB_01390
dmsB_2		Anaerobic dimethyl sulfoxide reductase chain B	102	102	1	1	10579				629	629	629	DGJMBLJC_00956	HFDHOMNF_02971	ALEPGING_00818	GEOGNNEI_02795	BINKDPLB_01923	IPPPMGOG_01404	NCHKEDON_00963	PLMPIJHD_02763	LIBHOFBA_02575	MFAGDJPO_01383	AICMNGMC_02883	JAGDPAPJ_02818	JICHJFDH_03535	AHEHGMLM_02143	PABJNMJP_04066	MAPHOHON_03867	ONDKMJBG_03198	JDGDJJKN_03093	KLMHLHPE_02287	EGICBAEE_01414	LNEFCFII_02017	NILJAHBC_02362	KCIFOFJF_03288	CJCKLIFP_01525	IABBECJM_01719	LANDOHOG_01991	LOGCBOHO_02124	DKGFALGN_02481	PNFFMGCL_01757	BJCGHIIB_01957	NHHDDJBG_01763	LBLHELLM_00968	CGJPMKCI_01914	JOHJONHN_02122	CNEDDIJH_01556	JLJGJGIB_01382
sseA_2		3-mercaptopyruvate sulfurtransferase	102	102	1	1	10594				524	842	838	DGJMBLJC_00960	HFDHOMNF_02967	ALEPGING_00877	GEOGNNEI_02799	BINKDPLB_01927	IPPPMGOG_01408	NCHKEDON_00967	PLMPIJHD_02767	LIBHOFBA_02579	MFAGDJPO_01387	AICMNGMC_02887	JAGDPAPJ_02822	JICHJFDH_03531	AHEHGMLM_02139	PABJNMJP_04070	MAPHOHON_03863	ONDKMJBG_03202	JDGDJJKN_03097	KLMHLHPE_02291	EGICBAEE_01418	LNEFCFII_02021	NILJAHBC_02358	KCIFOFJF_03284	CJCKLIFP_01529	IABBECJM_01715	LANDOHOG_01995	LOGCBOHO_02120	DKGFALGN_02485	PNFFMGCL_01753	BJCGHIIB_01961	NHHDDJBG_01767	LBLHELLM_00964	CGJPMKCI_01910	JOHJONHN_02118	CNEDDIJH_01560	JLJGJGIB_01378
asrC		Anaerobic sulfite reductase subunit C	102	102	1	1	10628				818	1013	1011	DGJMBLJC_00982	HFDHOMNF_02948	ALEPGING_00858	GEOGNNEI_02818	BINKDPLB_01946	IPPPMGOG_01427	NCHKEDON_00986	PLMPIJHD_02786	LIBHOFBA_02598	MFAGDJPO_01406	AICMNGMC_02906	JAGDPAPJ_02841	JICHJFDH_03512	AHEHGMLM_02120	PABJNMJP_04089	MAPHOHON_03844	ONDKMJBG_03221	JDGDJJKN_03116	KLMHLHPE_02310	EGICBAEE_01437	LNEFCFII_02040	NILJAHBC_02339	KCIFOFJF_03265	CJCKLIFP_01548	IABBECJM_01696	LANDOHOG_02014	LOGCBOHO_02101	DKGFALGN_02504	PNFFMGCL_01734	BJCGHIIB_01980	NHHDDJBG_01786	LBLHELLM_00945	CGJPMKCI_01891	JOHJONHN_02099	CNEDDIJH_01579	JLJGJGIB_01359
tadA		tRNA-specific adenosine deaminase	102	102	1	1	10657				497	518	517	DGJMBLJC_01003	HFDHOMNF_02926	ALEPGING_02545	GEOGNNEI_02835	BINKDPLB_01963	IPPPMGOG_01444	NCHKEDON_01003	PLMPIJHD_02803	LIBHOFBA_02615	MFAGDJPO_01423	AICMNGMC_02923	JAGDPAPJ_02858	JICHJFDH_03495	AHEHGMLM_02103	PABJNMJP_04106	MAPHOHON_03827	ONDKMJBG_03238	JDGDJJKN_03133	KLMHLHPE_02327	EGICBAEE_01454	LNEFCFII_02057	NILJAHBC_02322	KCIFOFJF_03248	CJCKLIFP_01565	IABBECJM_01679	LANDOHOG_02031	LOGCBOHO_02084	DKGFALGN_02521	PNFFMGCL_01717	BJCGHIIB_01997	NHHDDJBG_01803	LBLHELLM_00928	CGJPMKCI_01874	JOHJONHN_02082	CNEDDIJH_01596	JLJGJGIB_01342
pdxJ		Pyridoxine 5'-phosphate synthase	102	102	1	1	10670				386	731	727	DGJMBLJC_01013	HFDHOMNF_02915	ALEPGING_02555	GEOGNNEI_02845	BINKDPLB_01973	IPPPMGOG_01454	NCHKEDON_01013	PLMPIJHD_02813	LIBHOFBA_02625	MFAGDJPO_01433	AICMNGMC_02933	JAGDPAPJ_02868	JICHJFDH_03485	AHEHGMLM_02093	PABJNMJP_04116	MAPHOHON_03817	ONDKMJBG_03248	JDGDJJKN_03143	KLMHLHPE_02337	EGICBAEE_01464	LNEFCFII_02067	NILJAHBC_02312	KCIFOFJF_03238	CJCKLIFP_01575	IABBECJM_01669	LANDOHOG_02041	LOGCBOHO_02074	DKGFALGN_02531	PNFFMGCL_01707	BJCGHIIB_02007	NHHDDJBG_01813	LBLHELLM_00918	CGJPMKCI_01864	JOHJONHN_02072	CNEDDIJH_01606	JLJGJGIB_01332
pat		Protein lysine acetyltransferase Pat	102	102	1	1	10703				2306	2660	2656	DGJMBLJC_01034	HFDHOMNF_02892	ALEPGING_03905	GEOGNNEI_02865	BINKDPLB_01993	IPPPMGOG_01474	NCHKEDON_01033	PLMPIJHD_02833	LIBHOFBA_02645	MFAGDJPO_01453	AICMNGMC_02953	JAGDPAPJ_02888	JICHJFDH_03465	AHEHGMLM_02073	PABJNMJP_04136	MAPHOHON_03797	ONDKMJBG_03268	JDGDJJKN_03163	KLMHLHPE_02357	EGICBAEE_01484	LNEFCFII_02087	NILJAHBC_02292	KCIFOFJF_03218	CJCKLIFP_01595	IABBECJM_01649	LANDOHOG_02061	LOGCBOHO_02054	DKGFALGN_02551	PNFFMGCL_01687	BJCGHIIB_02027	NHHDDJBG_01833	LBLHELLM_00898	CGJPMKCI_01844	JOHJONHN_02052	CNEDDIJH_01626	JLJGJGIB_01312
lnt		Apolipoprotein N-acyltransferase	102	102	1	1	4968				1538	1589	1586	DGJMBLJC_01085	HFDHOMNF_03167	ALEPGING_00021	GEOGNNEI_04100	BINKDPLB_03855	IPPPMGOG_03145	NCHKEDON_04620	PLMPIJHD_04210	LIBHOFBA_04293	MFAGDJPO_04085	AICMNGMC_04013	JAGDPAPJ_04204	JICHJFDH_02948	AHEHGMLM_00256	PABJNMJP_02827	MAPHOHON_03693	ONDKMJBG_03711	JDGDJJKN_00789	KLMHLHPE_02814	EGICBAEE_03326	LNEFCFII_03025	NILJAHBC_03472	KCIFOFJF_03114	CJCKLIFP_03429	IABBECJM_03484	LANDOHOG_03482	LOGCBOHO_03156	DKGFALGN_02847	PNFFMGCL_03607	BJCGHIIB_02703	NHHDDJBG_03361	LBLHELLM_01642	CGJPMKCI_02657	JOHJONHN_03426	CNEDDIJH_04082	JLJGJGIB_03751
catM		HTH-type transcriptional regulator CatM	102	102	1	1	4998				293	926	914	DGJMBLJC_01110	HFDHOMNF_03140	ALEPGING_04300	GEOGNNEI_04126	BINKDPLB_03881	IPPPMGOG_03171	NCHKEDON_04646	PLMPIJHD_04236	LIBHOFBA_04319	MFAGDJPO_04111	AICMNGMC_04039	JAGDPAPJ_04230	JICHJFDH_00727	AHEHGMLM_03692	PABJNMJP_02853	MAPHOHON_03667	ONDKMJBG_03685	JDGDJJKN_00763	KLMHLHPE_02788	EGICBAEE_03300	LNEFCFII_03051	NILJAHBC_03446	KCIFOFJF_03088	CJCKLIFP_03403	IABBECJM_03510	LANDOHOG_03508	LOGCBOHO_03130	DKGFALGN_02873	PNFFMGCL_04032	BJCGHIIB_02729	NHHDDJBG_04014	LBLHELLM_03801	CGJPMKCI_02631	JOHJONHN_04086	CNEDDIJH_03777	JLJGJGIB_03895
ybfF		Esterase YbfF	102	102	1	1	5002				770	773	770	DGJMBLJC_01114	HFDHOMNF_03136	ALEPGING_04296	GEOGNNEI_04130	BINKDPLB_03885	IPPPMGOG_03175	NCHKEDON_04650	PLMPIJHD_04240	LIBHOFBA_04323	MFAGDJPO_04115	AICMNGMC_04043	JAGDPAPJ_04234	JICHJFDH_00731	AHEHGMLM_03688	PABJNMJP_02857	MAPHOHON_03663	ONDKMJBG_03681	JDGDJJKN_00759	KLMHLHPE_02784	EGICBAEE_03296	LNEFCFII_03055	NILJAHBC_03442	KCIFOFJF_03084	CJCKLIFP_03399	IABBECJM_03514	LANDOHOG_03512	LOGCBOHO_03126	DKGFALGN_02877	PNFFMGCL_04028	BJCGHIIB_02733	NHHDDJBG_04010	LBLHELLM_03805	CGJPMKCI_02627	JOHJONHN_04082	CNEDDIJH_03773	JLJGJGIB_03899
seqA		Negative modulator of initiation of replication	102	102	1	1	5004				317	542	539	DGJMBLJC_01115	HFDHOMNF_03135	ALEPGING_04295	GEOGNNEI_04131	BINKDPLB_03886	IPPPMGOG_03176	NCHKEDON_04651	PLMPIJHD_04241	LIBHOFBA_04324	MFAGDJPO_04116	AICMNGMC_04044	JAGDPAPJ_04235	JICHJFDH_00732	AHEHGMLM_03687	PABJNMJP_02858	MAPHOHON_03662	ONDKMJBG_03680	JDGDJJKN_00758	KLMHLHPE_02783	EGICBAEE_03295	LNEFCFII_03056	NILJAHBC_03441	KCIFOFJF_03083	CJCKLIFP_03398	IABBECJM_03515	LANDOHOG_03513	LOGCBOHO_03125	DKGFALGN_02878	PNFFMGCL_04027	BJCGHIIB_02734	NHHDDJBG_04009	LBLHELLM_03806	CGJPMKCI_02626	JOHJONHN_04081	CNEDDIJH_03772	JLJGJGIB_03900
sucD		Succinate--CoA ligase [ADP-forming] subunit alpha	102	102	1	1	5084				767	929	868	DGJMBLJC_01148	HFDHOMNF_03105	ALEPGING_00539	GEOGNNEI_04159	BINKDPLB_03914	IPPPMGOG_03204	NCHKEDON_04679	PLMPIJHD_04270	LIBHOFBA_04353	MFAGDJPO_04145	AICMNGMC_04073	JAGDPAPJ_04263	JICHJFDH_00761	AHEHGMLM_03659	PABJNMJP_02886	MAPHOHON_04479	ONDKMJBG_03652	JDGDJJKN_00729	KLMHLHPE_02755	EGICBAEE_03267	LNEFCFII_03084	NILJAHBC_03413	KCIFOFJF_03055	CJCKLIFP_03370	IABBECJM_03543	LANDOHOG_03541	LOGCBOHO_03097	DKGFALGN_02906	PNFFMGCL_03999	BJCGHIIB_02762	NHHDDJBG_03981	LBLHELLM_03834	CGJPMKCI_02598	JOHJONHN_04053	CNEDDIJH_03744	JLJGJGIB_03928
ybgC		Acyl-CoA thioester hydrolase YbgC	102	102	1	1	5093				404	404	404	DGJMBLJC_01155	HFDHOMNF_03099	ALEPGING_01132	GEOGNNEI_04165	BINKDPLB_03920	IPPPMGOG_03210	NCHKEDON_04685	PLMPIJHD_04276	LIBHOFBA_04359	MFAGDJPO_04151	AICMNGMC_04079	JAGDPAPJ_04269	JICHJFDH_00767	AHEHGMLM_03653	PABJNMJP_02892	MAPHOHON_04485	ONDKMJBG_03646	JDGDJJKN_00723	KLMHLHPE_02749	EGICBAEE_03261	LNEFCFII_03090	NILJAHBC_03407	KCIFOFJF_03049	CJCKLIFP_03364	IABBECJM_03549	LANDOHOG_03547	LOGCBOHO_03091	DKGFALGN_02912	PNFFMGCL_03993	BJCGHIIB_02768	NHHDDJBG_03975	LBLHELLM_03840	CGJPMKCI_02592	JOHJONHN_04047	CNEDDIJH_03738	JLJGJGIB_03934
dmlR_4		HTH-type transcriptional regulator DmlR	102	102	1	1	5401				683	911	908	DGJMBLJC_01180	HFDHOMNF_01323	ALEPGING_04189	GEOGNNEI_04448	BINKDPLB_01591	IPPPMGOG_03396	NCHKEDON_01598	PLMPIJHD_04559	LIBHOFBA_04642	MFAGDJPO_04578	AICMNGMC_04367	JAGDPAPJ_04552	JICHJFDH_00866	AHEHGMLM_02252	PABJNMJP_01835	MAPHOHON_03424	ONDKMJBG_04237	JDGDJJKN_00565	KLMHLHPE_03316	EGICBAEE_03469	LNEFCFII_03326	NILJAHBC_03662	KCIFOFJF_03447	CJCKLIFP_03771	IABBECJM_03814	LANDOHOG_03613	LOGCBOHO_03669	DKGFALGN_03353	PNFFMGCL_04159	BJCGHIIB_03718	NHHDDJBG_03393	LBLHELLM_04075	CGJPMKCI_03706	JOHJONHN_03651	CNEDDIJH_03173	JLJGJGIB_02641
artI		Putative ABC transporter arginine-binding protein 2	102	102	1	1	5349				440	731	728	DGJMBLJC_01207	HFDHOMNF_01351	ALEPGING_02731	GEOGNNEI_04425	BINKDPLB_01568	IPPPMGOG_03419	NCHKEDON_01575	PLMPIJHD_04536	LIBHOFBA_04619	MFAGDJPO_04555	AICMNGMC_04344	JAGDPAPJ_04529	JICHJFDH_00843	AHEHGMLM_02228	PABJNMJP_01811	MAPHOHON_03448	ONDKMJBG_04261	JDGDJJKN_00588	KLMHLHPE_03339	EGICBAEE_03492	LNEFCFII_03349	NILJAHBC_03639	KCIFOFJF_03424	CJCKLIFP_03748	IABBECJM_03791	LANDOHOG_03636	LOGCBOHO_03646	DKGFALGN_03330	PNFFMGCL_04136	BJCGHIIB_03695	NHHDDJBG_03416	LBLHELLM_04052	CGJPMKCI_03729	JOHJONHN_03628	CNEDDIJH_03150	JLJGJGIB_02618
ybjO		Inner membrane protein YbjO	102	102	1	1	5340				401	401	401	DGJMBLJC_01216	HFDHOMNF_01359	ALEPGING_00517	GEOGNNEI_04417	BINKDPLB_01560	IPPPMGOG_03427	NCHKEDON_01567	PLMPIJHD_04528	LIBHOFBA_04611	MFAGDJPO_04547	AICMNGMC_04336	JAGDPAPJ_04521	JICHJFDH_00835	AHEHGMLM_02220	PABJNMJP_01803	MAPHOHON_03456	ONDKMJBG_04269	JDGDJJKN_00596	KLMHLHPE_03347	EGICBAEE_03500	LNEFCFII_03357	NILJAHBC_03631	KCIFOFJF_03416	CJCKLIFP_03740	IABBECJM_03783	LANDOHOG_03644	LOGCBOHO_03638	DKGFALGN_03322	PNFFMGCL_03928	BJCGHIIB_04101	NHHDDJBG_03424	LBLHELLM_03683	CGJPMKCI_03868	JOHJONHN_03620	CNEDDIJH_03142	JLJGJGIB_02610
deoR_2		Deoxyribose operon repressor	102	102	1	1	5314				401	758	754	DGJMBLJC_01236	HFDHOMNF_01377	ALEPGING_00500	GEOGNNEI_04400	BINKDPLB_01543	IPPPMGOG_03444	NCHKEDON_01550	PLMPIJHD_04511	LIBHOFBA_04594	MFAGDJPO_04530	AICMNGMC_04319	JAGDPAPJ_04504	JICHJFDH_00818	AHEHGMLM_02203	PABJNMJP_01786	MAPHOHON_03473	ONDKMJBG_04286	JDGDJJKN_00613	KLMHLHPE_03364	EGICBAEE_03517	LNEFCFII_03374	NILJAHBC_03614	KCIFOFJF_03399	CJCKLIFP_03723	IABBECJM_03766	LANDOHOG_03661	LOGCBOHO_03621	DKGFALGN_03305	PNFFMGCL_03911	BJCGHIIB_04084	NHHDDJBG_03441	LBLHELLM_03700	CGJPMKCI_03885	JOHJONHN_03603	CNEDDIJH_03124	JLJGJGIB_02593
gsiD		Glutathione transport system permease protein GsiD	102	102	1	1	5279				791	911	909	DGJMBLJC_01242	HFDHOMNF_01392	ALEPGING_03573	GEOGNNEI_04385	BINKDPLB_01528	IPPPMGOG_03459	NCHKEDON_01535	PLMPIJHD_04496	LIBHOFBA_04579	MFAGDJPO_04515	AICMNGMC_04304	JAGDPAPJ_04489	JICHJFDH_00803	AHEHGMLM_02188	PABJNMJP_01771	MAPHOHON_03488	ONDKMJBG_04301	JDGDJJKN_00619	KLMHLHPE_03379	EGICBAEE_03533	LNEFCFII_03389	NILJAHBC_03599	KCIFOFJF_03384	CJCKLIFP_03708	IABBECJM_03751	LANDOHOG_03676	LOGCBOHO_03606	DKGFALGN_03290	PNFFMGCL_03896	BJCGHIIB_04069	NHHDDJBG_03456	LBLHELLM_03715	CGJPMKCI_03900	JOHJONHN_03588	CNEDDIJH_03109	JLJGJGIB_02578
gsiB		Glutathione-binding protein GsiB	102	102	1	1	5277				740	1538	1530	DGJMBLJC_01244	HFDHOMNF_01394	ALEPGING_03575	GEOGNNEI_04383	BINKDPLB_01526	IPPPMGOG_03461	NCHKEDON_01533	PLMPIJHD_04494	LIBHOFBA_04577	MFAGDJPO_04513	AICMNGMC_04302	JAGDPAPJ_04487	JICHJFDH_00801	AHEHGMLM_02186	PABJNMJP_01769	MAPHOHON_03490	ONDKMJBG_04303	JDGDJJKN_00621	KLMHLHPE_03381	EGICBAEE_03535	LNEFCFII_03391	NILJAHBC_03597	KCIFOFJF_03382	CJCKLIFP_03706	IABBECJM_03749	LANDOHOG_03678	LOGCBOHO_03604	DKGFALGN_03288	PNFFMGCL_03894	BJCGHIIB_04067	NHHDDJBG_03458	LBLHELLM_03717	CGJPMKCI_03902	JOHJONHN_03586	CNEDDIJH_03107	JLJGJGIB_02576
cutD		Choline trimethylamine-lyase activating enzyme	102	102	1	1	5271				323	899	893	DGJMBLJC_01251	HFDHOMNF_01399	ALEPGING_03580	GEOGNNEI_04378	BINKDPLB_01521	IPPPMGOG_03466	NCHKEDON_01528	PLMPIJHD_04489	LIBHOFBA_04572	MFAGDJPO_04508	AICMNGMC_04297	JAGDPAPJ_04482	JICHJFDH_00796	AHEHGMLM_02181	PABJNMJP_01764	MAPHOHON_03495	ONDKMJBG_04308	JDGDJJKN_00626	KLMHLHPE_03386	EGICBAEE_03540	LNEFCFII_03396	NILJAHBC_03592	KCIFOFJF_03377	CJCKLIFP_03701	IABBECJM_03744	LANDOHOG_03683	LOGCBOHO_03599	DKGFALGN_03283	PNFFMGCL_03889	BJCGHIIB_04062	NHHDDJBG_03463	LBLHELLM_03722	CGJPMKCI_03907	JOHJONHN_03581	CNEDDIJH_03102	JLJGJGIB_02571
glnH		Glutamine-binding periplasmic protein	102	102	1	1	5240				587	746	744	DGJMBLJC_01270	HFDHOMNF_01416	ALEPGING_03594	GEOGNNEI_04364	BINKDPLB_01507	IPPPMGOG_03480	NCHKEDON_01514	PLMPIJHD_04475	LIBHOFBA_04558	MFAGDJPO_04494	AICMNGMC_04283	JAGDPAPJ_04468	JICHJFDH_00782	AHEHGMLM_02167	PABJNMJP_01750	MAPHOHON_03509	ONDKMJBG_04322	JDGDJJKN_00639	KLMHLHPE_03400	EGICBAEE_03554	LNEFCFII_03410	NILJAHBC_03578	KCIFOFJF_03363	CJCKLIFP_03687	IABBECJM_03730	LANDOHOG_03697	LOGCBOHO_03585	DKGFALGN_03269	PNFFMGCL_03875	BJCGHIIB_04048	NHHDDJBG_03477	LBLHELLM_03736	CGJPMKCI_03921	JOHJONHN_03567	CNEDDIJH_03088	JLJGJGIB_02557
srlR_3		Glucitol operon repressor	102	102	1	1	2157				263	773	768	DGJMBLJC_01296	HFDHOMNF_03440	ALEPGING_02316	GEOGNNEI_01308	BINKDPLB_00069	IPPPMGOG_01088	NCHKEDON_01388	PLMPIJHD_01102	LIBHOFBA_00912	MFAGDJPO_03080	AICMNGMC_01103	JAGDPAPJ_01246	JICHJFDH_00112	AHEHGMLM_02655	PABJNMJP_00382	MAPHOHON_02253	ONDKMJBG_00603	JDGDJJKN_01582	KLMHLHPE_01298	EGICBAEE_00954	LNEFCFII_01286	NILJAHBC_01931	KCIFOFJF_01940	CJCKLIFP_02074	IABBECJM_01289	LANDOHOG_01532	LOGCBOHO_01532	DKGFALGN_01557	PNFFMGCL_01614	BJCGHIIB_01092	NHHDDJBG_00069	LBLHELLM_00070	CGJPMKCI_01254	JOHJONHN_01008	CNEDDIJH_00624	JLJGJGIB_00574
hpf_1		Putative metal ABC transporter substrate-binding protein Hpf	102	102	1	1	2126				233	917	910	DGJMBLJC_01320	HFDHOMNF_03465	ALEPGING_00975	GEOGNNEI_01332	BINKDPLB_00093	IPPPMGOG_01064	NCHKEDON_01364	PLMPIJHD_01126	LIBHOFBA_00936	MFAGDJPO_03104	AICMNGMC_01127	JAGDPAPJ_01270	JICHJFDH_00136	AHEHGMLM_02631	PABJNMJP_00358	MAPHOHON_02229	ONDKMJBG_00627	JDGDJJKN_01558	KLMHLHPE_01274	EGICBAEE_00930	LNEFCFII_01310	NILJAHBC_01955	KCIFOFJF_01916	CJCKLIFP_02098	IABBECJM_01313	LANDOHOG_01508	LOGCBOHO_01508	DKGFALGN_01533	PNFFMGCL_01590	BJCGHIIB_01068	NHHDDJBG_00093	LBLHELLM_00094	CGJPMKCI_01230	JOHJONHN_00984	CNEDDIJH_00648	JLJGJGIB_00598
nlpD_1		Murein hydrolase activator NlpD	102	102	1	1	2022				941	1133	1121	DGJMBLJC_01392	HFDHOMNF_03535	ALEPGING_00730	GEOGNNEI_01395	BINKDPLB_00156	IPPPMGOG_01001	NCHKEDON_01301	PLMPIJHD_01189	LIBHOFBA_00999	MFAGDJPO_03167	AICMNGMC_01190	JAGDPAPJ_01333	JICHJFDH_00199	AHEHGMLM_02467	PABJNMJP_00295	MAPHOHON_02166	ONDKMJBG_00690	JDGDJJKN_01493	KLMHLHPE_01211	EGICBAEE_00867	LNEFCFII_01373	NILJAHBC_02018	KCIFOFJF_01853	CJCKLIFP_02161	IABBECJM_01376	LANDOHOG_01445	LOGCBOHO_01445	DKGFALGN_01470	PNFFMGCL_01527	BJCGHIIB_01005	NHHDDJBG_00156	LBLHELLM_00157	CGJPMKCI_01167	JOHJONHN_00921	CNEDDIJH_00711	JLJGJGIB_00661
truD		tRNA pseudouridine synthase D	102	102	1	1	2014				1049	1049	1049	DGJMBLJC_01395	HFDHOMNF_03538	ALEPGING_00733	GEOGNNEI_01398	BINKDPLB_00159	IPPPMGOG_00998	NCHKEDON_01298	PLMPIJHD_01192	LIBHOFBA_01002	MFAGDJPO_03170	AICMNGMC_01193	JAGDPAPJ_01336	JICHJFDH_00202	AHEHGMLM_02464	PABJNMJP_00292	MAPHOHON_02163	ONDKMJBG_00693	JDGDJJKN_01490	KLMHLHPE_01208	EGICBAEE_00864	LNEFCFII_01376	NILJAHBC_02021	KCIFOFJF_01850	CJCKLIFP_02164	IABBECJM_01379	LANDOHOG_01442	LOGCBOHO_01442	DKGFALGN_01467	PNFFMGCL_01524	BJCGHIIB_01002	NHHDDJBG_00159	LBLHELLM_00160	CGJPMKCI_01164	JOHJONHN_00918	CNEDDIJH_00714	JLJGJGIB_00664
bepC		Outer membrane efflux protein BepC	102	102	1	1	16707				1409	1409	1409	DGJMBLJC_01433	HFDHOMNF_03345	ALEPGING_04317	GEOGNNEI_02330	BINKDPLB_03440	IPPPMGOG_01172	NCHKEDON_02664	PLMPIJHD_02921	LIBHOFBA_02733	MFAGDJPO_02702	AICMNGMC_02986	JAGDPAPJ_02921	JICHJFDH_00028	AHEHGMLM_04078	PABJNMJP_02664	MAPHOHON_02336	ONDKMJBG_04630	JDGDJJKN_01662	KLMHLHPE_01381	EGICBAEE_01039	LNEFCFII_01203	NILJAHBC_01848	KCIFOFJF_04392	CJCKLIFP_04455	IABBECJM_01206	LANDOHOG_01615	LOGCBOHO_01615	DKGFALGN_04178	PNFFMGCL_04066	BJCGHIIB_01177	NHHDDJBG_04142	LBLHELLM_03938	CGJPMKCI_04009	JOHJONHN_04336	CNEDDIJH_04224	JLJGJGIB_03874
group_4106		hypothetical protein	102	102	1	1	2227				314	431	429	DGJMBLJC_01459	HFDHOMNF_03381	ALEPGING_03959	GEOGNNEI_01254	BINKDPLB_00015	IPPPMGOG_01141	NCHKEDON_02733	PLMPIJHD_01048	LIBHOFBA_00858	MFAGDJPO_03026	AICMNGMC_01049	JAGDPAPJ_01192	JICHJFDH_00059	AHEHGMLM_02707	PABJNMJP_00436	MAPHOHON_02305	ONDKMJBG_00549	JDGDJJKN_01633	KLMHLHPE_01350	EGICBAEE_01008	LNEFCFII_01234	NILJAHBC_01879	KCIFOFJF_01994	CJCKLIFP_02020	IABBECJM_01237	LANDOHOG_01584	LOGCBOHO_01584	DKGFALGN_01611	PNFFMGCL_01668	BJCGHIIB_01146	NHHDDJBG_00015	LBLHELLM_00016	CGJPMKCI_01306	JOHJONHN_01062	CNEDDIJH_00570	JLJGJGIB_00520
group_4111		hypothetical protein	102	102	1	1	2212				677	692	677	DGJMBLJC_01470	HFDHOMNF_03391	ALEPGING_03519	GEOGNNEI_01262	BINKDPLB_00023	IPPPMGOG_01133	NCHKEDON_02725	PLMPIJHD_01056	LIBHOFBA_00866	MFAGDJPO_03034	AICMNGMC_01057	JAGDPAPJ_01200	JICHJFDH_00068	AHEHGMLM_02699	PABJNMJP_00428	MAPHOHON_02297	ONDKMJBG_00557	JDGDJJKN_01626	KLMHLHPE_01342	EGICBAEE_01000	LNEFCFII_01242	NILJAHBC_01887	KCIFOFJF_01986	CJCKLIFP_02028	IABBECJM_01245	LANDOHOG_01576	LOGCBOHO_01576	DKGFALGN_01603	PNFFMGCL_01660	BJCGHIIB_01138	NHHDDJBG_00023	LBLHELLM_00024	CGJPMKCI_01298	JOHJONHN_01054	CNEDDIJH_00578	JLJGJGIB_00528
stpA		DNA-binding protein StpA	102	102	1	1	2203				317	401	399	DGJMBLJC_01476	HFDHOMNF_03398	ALEPGING_03513	GEOGNNEI_01268	BINKDPLB_00029	IPPPMGOG_01127	NCHKEDON_02719	PLMPIJHD_01062	LIBHOFBA_00872	MFAGDJPO_03040	AICMNGMC_01063	JAGDPAPJ_01206	JICHJFDH_00074	AHEHGMLM_02693	PABJNMJP_00422	MAPHOHON_02291	ONDKMJBG_00563	JDGDJJKN_01620	KLMHLHPE_01336	EGICBAEE_00994	LNEFCFII_01248	NILJAHBC_01893	KCIFOFJF_01980	CJCKLIFP_02034	IABBECJM_01251	LANDOHOG_01570	LOGCBOHO_01570	DKGFALGN_01597	PNFFMGCL_01654	BJCGHIIB_01132	NHHDDJBG_00029	LBLHELLM_00030	CGJPMKCI_01292	JOHJONHN_01048	CNEDDIJH_00584	JLJGJGIB_00534
alaE		L-alanine exporter AlaE	102	102	1	1	2199				449	449	449	DGJMBLJC_01477	HFDHOMNF_03399	ALEPGING_02279	GEOGNNEI_01269	BINKDPLB_00030	IPPPMGOG_01126	NCHKEDON_02718	PLMPIJHD_01063	LIBHOFBA_00873	MFAGDJPO_03041	AICMNGMC_01064	JAGDPAPJ_01207	JICHJFDH_00075	AHEHGMLM_02692	PABJNMJP_00421	MAPHOHON_02290	ONDKMJBG_00564	JDGDJJKN_01619	KLMHLHPE_01335	EGICBAEE_00993	LNEFCFII_01249	NILJAHBC_01894	KCIFOFJF_01979	CJCKLIFP_02035	IABBECJM_01252	LANDOHOG_01569	LOGCBOHO_01569	DKGFALGN_01596	PNFFMGCL_01653	BJCGHIIB_01131	NHHDDJBG_00030	LBLHELLM_00031	CGJPMKCI_01291	JOHJONHN_01047	CNEDDIJH_00585	JLJGJGIB_00535
yqaA		Inner membrane protein YqaA	102	102	1	1	2175				413	425	424	DGJMBLJC_01498	HFDHOMNF_03422	ALEPGING_02298	GEOGNNEI_01288	BINKDPLB_00049	IPPPMGOG_01107	NCHKEDON_02699	PLMPIJHD_01082	LIBHOFBA_00892	MFAGDJPO_03060	AICMNGMC_01083	JAGDPAPJ_01226	JICHJFDH_00094	AHEHGMLM_02673	PABJNMJP_00402	MAPHOHON_02271	ONDKMJBG_00583	JDGDJJKN_01600	KLMHLHPE_01316	EGICBAEE_00974	LNEFCFII_01268	NILJAHBC_01913	KCIFOFJF_01960	CJCKLIFP_02054	IABBECJM_01271	LANDOHOG_01550	LOGCBOHO_01550	DKGFALGN_01577	PNFFMGCL_01634	BJCGHIIB_01112	NHHDDJBG_00049	LBLHELLM_00050	CGJPMKCI_01272	JOHJONHN_01028	CNEDDIJH_00604	JLJGJGIB_00554
rpoN		RNA polymerase sigma-54 factor	102	102	1	1	13462				1061	1433	1429	DGJMBLJC_01535	HFDHOMNF_01241	ALEPGING_00947	GEOGNNEI_02378	BINKDPLB_02566	IPPPMGOG_00032	NCHKEDON_01269	PLMPIJHD_03006	LIBHOFBA_02818	MFAGDJPO_02787	AICMNGMC_03071	JAGDPAPJ_03006	JICHJFDH_03683	AHEHGMLM_04192	PABJNMJP_02333	MAPHOHON_03261	ONDKMJBG_04568	JDGDJJKN_01060	KLMHLHPE_04357	EGICBAEE_04424	LNEFCFII_04449	NILJAHBC_04453	KCIFOFJF_04440	CJCKLIFP_03648	IABBECJM_03691	LANDOHOG_04449	LOGCBOHO_03546	DKGFALGN_04276	PNFFMGCL_04114	BJCGHIIB_04192	NHHDDJBG_04052	LBLHELLM_04030	CGJPMKCI_04056	JOHJONHN_04383	CNEDDIJH_04302	JLJGJGIB_04108
group_4121		hypothetical protein	102	102	1	1	13447				272	287	286	DGJMBLJC_01549	HFDHOMNF_01227	ALEPGING_00961	GEOGNNEI_02392	BINKDPLB_02580	IPPPMGOG_00018	NCHKEDON_01283	PLMPIJHD_03020	LIBHOFBA_02832	MFAGDJPO_02801	AICMNGMC_03085	JAGDPAPJ_03020	JICHJFDH_03669	AHEHGMLM_04206	PABJNMJP_02347	MAPHOHON_03275	ONDKMJBG_04582	JDGDJJKN_01074	KLMHLHPE_04371	EGICBAEE_04438	LNEFCFII_04435	NILJAHBC_04467	KCIFOFJF_04426	CJCKLIFP_03634	IABBECJM_03677	LANDOHOG_04463	LOGCBOHO_03532	DKGFALGN_04290	PNFFMGCL_04128	BJCGHIIB_04206	NHHDDJBG_04066	LBLHELLM_04044	CGJPMKCI_04070	JOHJONHN_04397	CNEDDIJH_04288	JLJGJGIB_04341
obg		GTPase Obg	102	102	1	1	13441				917	1175	1169	DGJMBLJC_01554	HFDHOMNF_01222	ALEPGING_01361	GEOGNNEI_02397	BINKDPLB_02585	IPPPMGOG_00013	NCHKEDON_01288	PLMPIJHD_03025	LIBHOFBA_02837	MFAGDJPO_02806	AICMNGMC_03090	JAGDPAPJ_03025	JICHJFDH_03664	AHEHGMLM_04211	PABJNMJP_02352	MAPHOHON_03280	ONDKMJBG_04587	JDGDJJKN_01079	KLMHLHPE_04376	EGICBAEE_04443	LNEFCFII_04430	NILJAHBC_04472	KCIFOFJF_04421	CJCKLIFP_03629	IABBECJM_03672	LANDOHOG_04468	LOGCBOHO_03527	DKGFALGN_04295	PNFFMGCL_04133	BJCGHIIB_04211	NHHDDJBG_04071	LBLHELLM_04049	CGJPMKCI_04075	JOHJONHN_04402	CNEDDIJH_04283	JLJGJGIB_04336
group_4126		hypothetical protein	102	102	1	1	13408				857	878	877	DGJMBLJC_01584	HFDHOMNF_01193	ALEPGING_01335	GEOGNNEI_01858	BINKDPLB_01253	IPPPMGOG_03563	NCHKEDON_01430	PLMPIJHD_01784	LIBHOFBA_01593	MFAGDJPO_01765	AICMNGMC_01643	JAGDPAPJ_01786	JICHJFDH_02078	AHEHGMLM_04237	PABJNMJP_02378	MAPHOHON_03306	ONDKMJBG_03466	JDGDJJKN_01105	KLMHLHPE_04095	EGICBAEE_03837	LNEFCFII_03882	NILJAHBC_03901	KCIFOFJF_03816	CJCKLIFP_03603	IABBECJM_03646	LANDOHOG_03900	LOGCBOHO_03501	DKGFALGN_03553	PNFFMGCL_03268	BJCGHIIB_03491	NHHDDJBG_03509	LBLHELLM_03435	CGJPMKCI_03503	JOHJONHN_03737	CNEDDIJH_03259	JLJGJGIB_03428
gltC_2		HTH-type transcriptional regulator GltC	102	102	1	1	15229				491	890	883	DGJMBLJC_01625	HFDHOMNF_02035	ALEPGING_02428	GEOGNNEI_02046	BINKDPLB_02488	IPPPMGOG_01323	NCHKEDON_04501	PLMPIJHD_02088	LIBHOFBA_01896	MFAGDJPO_01955	AICMNGMC_01929	JAGDPAPJ_02088	JICHJFDH_03862	AHEHGMLM_04446	PABJNMJP_00766	MAPHOHON_04061	ONDKMJBG_01977	JDGDJJKN_04138	KLMHLHPE_04132	EGICBAEE_04027	LNEFCFII_04202	NILJAHBC_04219	KCIFOFJF_04133	CJCKLIFP_04225	IABBECJM_04205	LANDOHOG_04152	LOGCBOHO_04203	DKGFALGN_03743	PNFFMGCL_03730	BJCGHIIB_03682	NHHDDJBG_03594	LBLHELLM_03472	CGJPMKCI_03652	JOHJONHN_03950	CNEDDIJH_03576	JLJGJGIB_03464
ilvC		Ketol-acid reductoisomerase (NADP(+))	102	102	1	1	15232			Hypothetical protein with no hits to refseq/uniprot/clusters/cdd/tigrfams/pfam overlapping another protein with hits	173	1475	1462	DGJMBLJC_01626	HFDHOMNF_02034	ALEPGING_04214	GEOGNNEI_02047	BINKDPLB_02489	IPPPMGOG_01322	NCHKEDON_04500	PLMPIJHD_02089	LIBHOFBA_01897	MFAGDJPO_01956	AICMNGMC_01930	JAGDPAPJ_02089	JICHJFDH_03861	AHEHGMLM_04445	PABJNMJP_00765	MAPHOHON_04060	ONDKMJBG_01978	JDGDJJKN_04139	KLMHLHPE_04133	EGICBAEE_04028	LNEFCFII_04201	NILJAHBC_04218	KCIFOFJF_04132	CJCKLIFP_04224	IABBECJM_04206	LANDOHOG_04153	LOGCBOHO_04204	DKGFALGN_03744	PNFFMGCL_03731	BJCGHIIB_03681	NHHDDJBG_03595	LBLHELLM_03473	CGJPMKCI_03651	JOHJONHN_03949	CNEDDIJH_03575	JLJGJGIB_03465
wecB		UDP-N-acetylglucosamine 2-epimerase	102	102	1	1	15244				644	1085	1080	DGJMBLJC_01639	HFDHOMNF_02025	ALEPGING_04223	GEOGNNEI_02056	BINKDPLB_02498	IPPPMGOG_01313	NCHKEDON_04491	PLMPIJHD_02098	LIBHOFBA_01906	MFAGDJPO_01965	AICMNGMC_01939	JAGDPAPJ_02098	JICHJFDH_03852	AHEHGMLM_04436	PABJNMJP_00756	MAPHOHON_04051	ONDKMJBG_01987	JDGDJJKN_04151	KLMHLHPE_04142	EGICBAEE_04037	LNEFCFII_04192	NILJAHBC_04209	KCIFOFJF_04123	CJCKLIFP_04215	IABBECJM_04215	LANDOHOG_04162	LOGCBOHO_04213	DKGFALGN_03753	PNFFMGCL_03740	BJCGHIIB_03672	NHHDDJBG_03604	LBLHELLM_03482	CGJPMKCI_03642	JOHJONHN_03940	CNEDDIJH_03566	JLJGJGIB_03474
wecC		UDP-N-acetyl-D-mannosamine dehydrogenase	102	102	1	1	15245				920	1298	1255	DGJMBLJC_01640	HFDHOMNF_02024	ALEPGING_04224	GEOGNNEI_02057	BINKDPLB_02499	IPPPMGOG_01312	NCHKEDON_04490	PLMPIJHD_02099	LIBHOFBA_01907	MFAGDJPO_01966	AICMNGMC_01940	JAGDPAPJ_02099	JICHJFDH_03851	AHEHGMLM_04435	PABJNMJP_00755	MAPHOHON_04050	ONDKMJBG_01988	JDGDJJKN_04152	KLMHLHPE_04143	EGICBAEE_04038	LNEFCFII_04191	NILJAHBC_04208	KCIFOFJF_04122	CJCKLIFP_04214	IABBECJM_04216	LANDOHOG_04163	LOGCBOHO_04214	DKGFALGN_03754	PNFFMGCL_03741	BJCGHIIB_03671	NHHDDJBG_03605	LBLHELLM_03483	CGJPMKCI_03641	JOHJONHN_03939	CNEDDIJH_03565	JLJGJGIB_03475
hemD		Uroporphyrinogen-III synthase	102	102	1	1	15264				740	740	740	DGJMBLJC_01658	HFDHOMNF_02006	ALEPGING_00107	GEOGNNEI_02073	BINKDPLB_02515	IPPPMGOG_01296	NCHKEDON_04474	PLMPIJHD_02115	LIBHOFBA_01923	MFAGDJPO_01982	AICMNGMC_01956	JAGDPAPJ_02115	JICHJFDH_03836	AHEHGMLM_02333	PABJNMJP_00739	MAPHOHON_04034	ONDKMJBG_02004	JDGDJJKN_04168	KLMHLHPE_04159	EGICBAEE_04054	LNEFCFII_04175	NILJAHBC_04192	KCIFOFJF_04106	CJCKLIFP_04198	IABBECJM_04232	LANDOHOG_04179	LOGCBOHO_04230	DKGFALGN_03770	PNFFMGCL_03757	BJCGHIIB_03655	NHHDDJBG_03621	LBLHELLM_03499	CGJPMKCI_03625	JOHJONHN_03923	CNEDDIJH_03549	JLJGJGIB_03491
metE		5-methyltetrahydropteroyltriglutamate--homocysteine methyltransferase	102	102	1	1	15310				2210	2264	2263	DGJMBLJC_01689	HFDHOMNF_01978	ALEPGING_01930	GEOGNNEI_02099	BINKDPLB_02952	IPPPMGOG_01270	NCHKEDON_04448	PLMPIJHD_02141	LIBHOFBA_01949	MFAGDJPO_02008	AICMNGMC_01982	JAGDPAPJ_02141	JICHJFDH_03810	AHEHGMLM_02359	PABJNMJP_00713	MAPHOHON_04008	ONDKMJBG_02030	JDGDJJKN_04197	KLMHLHPE_04185	EGICBAEE_04080	LNEFCFII_04149	NILJAHBC_04166	KCIFOFJF_04080	CJCKLIFP_04172	IABBECJM_04258	LANDOHOG_04205	LOGCBOHO_04256	DKGFALGN_03796	PNFFMGCL_03783	BJCGHIIB_03629	NHHDDJBG_03647	LBLHELLM_03525	CGJPMKCI_03599	JOHJONHN_03897	CNEDDIJH_03523	JLJGJGIB_03517
tatB		Sec-independent protein translocase protein TatB	102	102	1	1	15321				251	548	545	DGJMBLJC_01699	HFDHOMNF_01967	ALEPGING_01939	GEOGNNEI_02108	BINKDPLB_02961	IPPPMGOG_01261	NCHKEDON_04439	PLMPIJHD_02150	LIBHOFBA_01958	MFAGDJPO_02017	AICMNGMC_01991	JAGDPAPJ_02150	JICHJFDH_03801	AHEHGMLM_02368	PABJNMJP_00704	MAPHOHON_03999	ONDKMJBG_02039	JDGDJJKN_04206	KLMHLHPE_04194	EGICBAEE_04089	LNEFCFII_04140	NILJAHBC_04157	KCIFOFJF_04071	CJCKLIFP_04163	IABBECJM_04267	LANDOHOG_04214	LOGCBOHO_04265	DKGFALGN_03805	PNFFMGCL_03792	BJCGHIIB_03620	NHHDDJBG_03656	LBLHELLM_03534	CGJPMKCI_03590	JOHJONHN_03888	CNEDDIJH_03514	JLJGJGIB_03526
glmU		Bifunctional protein GlmU	102	102	1	1	15038				1190	1370	1368	DGJMBLJC_01746	HFDHOMNF_02074	ALEPGING_00609	GEOGNNEI_02147	BINKDPLB_02122	IPPPMGOG_03740	NCHKEDON_02619	PLMPIJHD_02189	LIBHOFBA_01997	MFAGDJPO_03958	AICMNGMC_02116	JAGDPAPJ_02189	JICHJFDH_01973	AHEHGMLM_03095	PABJNMJP_03160	MAPHOHON_04112	ONDKMJBG_03886	JDGDJJKN_04389	KLMHLHPE_04244	EGICBAEE_04139	LNEFCFII_04251	NILJAHBC_04329	KCIFOFJF_04245	CJCKLIFP_04335	IABBECJM_04389	LANDOHOG_04325	LOGCBOHO_04377	DKGFALGN_04010	PNFFMGCL_03831	BJCGHIIB_03937	NHHDDJBG_03809	LBLHELLM_03584	CGJPMKCI_03758	JOHJONHN_03987	CNEDDIJH_03678	JLJGJGIB_03577
mnmE		tRNA modification GTPase MnmE	102	102	1	1	15012				1364	1403	1368	DGJMBLJC_01765	HFDHOMNF_02093	ALEPGING_00626	GEOGNNEI_02164	BINKDPLB_02139	IPPPMGOG_03757	NCHKEDON_02602	PLMPIJHD_02206	LIBHOFBA_02014	MFAGDJPO_03941	AICMNGMC_02133	JAGDPAPJ_02206	JICHJFDH_01990	AHEHGMLM_03112	PABJNMJP_03177	MAPHOHON_04095	ONDKMJBG_03903	JDGDJJKN_04343	KLMHLHPE_04227	EGICBAEE_04122	LNEFCFII_04234	NILJAHBC_04346	KCIFOFJF_04262	CJCKLIFP_04352	IABBECJM_04372	LANDOHOG_04342	LOGCBOHO_04394	DKGFALGN_03993	PNFFMGCL_03848	BJCGHIIB_03954	NHHDDJBG_03826	LBLHELLM_03567	CGJPMKCI_03775	JOHJONHN_04004	CNEDDIJH_03695	JLJGJGIB_03560
group_4161		hypothetical protein	102	102	1	1	14555				218	218	218	DGJMBLJC_01809	HFDHOMNF_03628	ALEPGING_03827	GEOGNNEI_03847	BINKDPLB_03584	IPPPMGOG_02241	NCHKEDON_01682	PLMPIJHD_01644	LIBHOFBA_01453	MFAGDJPO_01625	AICMNGMC_01503	JAGDPAPJ_01646	JICHJFDH_03418	AHEHGMLM_01979	PABJNMJP_02631	MAPHOHON_02905	ONDKMJBG_03509	JDGDJJKN_04452	KLMHLHPE_02708	EGICBAEE_03672	LNEFCFII_03669	NILJAHBC_03367	KCIFOFJF_03603	CJCKLIFP_03188	IABBECJM_03231	LANDOHOG_03229	LOGCBOHO_02915	DKGFALGN_03414	PNFFMGCL_02782	BJCGHIIB_02586	NHHDDJBG_02396	LBLHELLM_02368	CGJPMKCI_02384	JOHJONHN_03199	CNEDDIJH_03064	JLJGJGIB_01705
hslR		Heat shock protein 15	102	102	1	1	14503				314	401	400	DGJMBLJC_01844	HFDHOMNF_03591	ALEPGING_01717	GEOGNNEI_03880	BINKDPLB_03617	IPPPMGOG_04602	NCHKEDON_03299	PLMPIJHD_01677	LIBHOFBA_01486	MFAGDJPO_01658	AICMNGMC_01536	JAGDPAPJ_01679	JICHJFDH_03384	AHEHGMLM_03482	PABJNMJP_04643	MAPHOHON_02938	ONDKMJBG_03542	JDGDJJKN_03480	KLMHLHPE_02675	EGICBAEE_03639	LNEFCFII_03636	NILJAHBC_03334	KCIFOFJF_03570	CJCKLIFP_03221	IABBECJM_03264	LANDOHOG_03262	LOGCBOHO_02948	DKGFALGN_03447	PNFFMGCL_02749	BJCGHIIB_02553	NHHDDJBG_02363	LBLHELLM_02401	CGJPMKCI_02351	JOHJONHN_03166	CNEDDIJH_03031	JLJGJGIB_01738
gntR_4		HTH-type transcriptional regulator GntR	102	102	1	1	14441				830	1103	995	DGJMBLJC_01896	HFDHOMNF_01951	ALEPGING_01756	GEOGNNEI_03919	BINKDPLB_03656	IPPPMGOG_04563	NCHKEDON_03338	PLMPIJHD_01716	LIBHOFBA_01525	MFAGDJPO_01697	AICMNGMC_01575	JAGDPAPJ_01718	JICHJFDH_03345	AHEHGMLM_03443	PABJNMJP_04682	MAPHOHON_02977	ONDKMJBG_03581	JDGDJJKN_03436	KLMHLHPE_02636	EGICBAEE_03601	LNEFCFII_03598	NILJAHBC_03295	KCIFOFJF_03531	CJCKLIFP_03260	IABBECJM_03303	LANDOHOG_03301	LOGCBOHO_02987	DKGFALGN_03486	PNFFMGCL_02710	BJCGHIIB_02514	NHHDDJBG_02324	LBLHELLM_02440	CGJPMKCI_02312	JOHJONHN_03127	CNEDDIJH_02992	JLJGJGIB_01777
group_4182		hypothetical protein	102	102	1	1	14377				557	557	557	DGJMBLJC_01935	HFDHOMNF_01911	ALEPGING_01484	GEOGNNEI_03955	BINKDPLB_03692	IPPPMGOG_04527	NCHKEDON_03374	PLMPIJHD_01752	LIBHOFBA_01561	MFAGDJPO_01733	AICMNGMC_01611	JAGDPAPJ_01754	JICHJFDH_03309	AHEHGMLM_03407	PABJNMJP_04718	MAPHOHON_03013	ONDKMJBG_03617	JDGDJJKN_03399	KLMHLHPE_02600	EGICBAEE_03565	LNEFCFII_03562	NILJAHBC_03259	KCIFOFJF_03495	CJCKLIFP_03296	IABBECJM_03339	LANDOHOG_03337	LOGCBOHO_03023	DKGFALGN_03522	PNFFMGCL_02674	BJCGHIIB_02478	NHHDDJBG_02288	LBLHELLM_02476	CGJPMKCI_02276	JOHJONHN_03091	CNEDDIJH_02957	JLJGJGIB_01813
bcsZ		Endoglucanase	102	102	1	1	14298				296	1109	1093	DGJMBLJC_01979	HFDHOMNF_01872	ALEPGING_01304	GEOGNNEI_03992	BINKDPLB_03729	IPPPMGOG_04490	NCHKEDON_03409	PLMPIJHD_02944	LIBHOFBA_02756	MFAGDJPO_02725	AICMNGMC_03009	JAGDPAPJ_02944	JICHJFDH_03272	AHEHGMLM_02730	PABJNMJP_02485	MAPHOHON_03051	ONDKMJBG_02059	JDGDJJKN_03361	KLMHLHPE_02563	EGICBAEE_04362	LNEFCFII_04400	NILJAHBC_03221	KCIFOFJF_04369	CJCKLIFP_03334	IABBECJM_03377	LANDOHOG_03375	LOGCBOHO_03061	DKGFALGN_04214	PNFFMGCL_02637	BJCGHIIB_02441	NHHDDJBG_02251	LBLHELLM_02513	CGJPMKCI_02239	JOHJONHN_04301	CNEDDIJH_04164	JLJGJGIB_01850
dppC_2		Dipeptide transport system permease protein DppC	102	102	1	1	14275				902	902	902	DGJMBLJC_01993	HFDHOMNF_03947	ALEPGING_04087	GEOGNNEI_03635	BINKDPLB_03446	IPPPMGOG_02842	NCHKEDON_02386	PLMPIJHD_03915	LIBHOFBA_04000	MFAGDJPO_03725	AICMNGMC_02341	JAGDPAPJ_03914	JICHJFDH_03736	AHEHGMLM_02300	PABJNMJP_03693	MAPHOHON_02883	ONDKMJBG_04006	JDGDJJKN_03349	KLMHLHPE_02550	EGICBAEE_03051	LNEFCFII_02920	NILJAHBC_03209	KCIFOFJF_02839	CJCKLIFP_03166	IABBECJM_03209	LANDOHOG_03207	LOGCBOHO_02893	DKGFALGN_02560	PNFFMGCL_02625	BJCGHIIB_02429	NHHDDJBG_02239	LBLHELLM_02163	CGJPMKCI_04315	JOHJONHN_02615	CNEDDIJH_02336	JLJGJGIB_02546
group_4197		hypothetical protein	102	102	1	1	14236				290	407	331	DGJMBLJC_02012	HFDHOMNF_03974	ALEPGING_00393	GEOGNNEI_03657	BINKDPLB_03956	IPPPMGOG_02820	NCHKEDON_02408	PLMPIJHD_03937	LIBHOFBA_04022	MFAGDJPO_03747	AICMNGMC_02363	JAGDPAPJ_03936	JICHJFDH_01099	AHEHGMLM_02321	PABJNMJP_03671	MAPHOHON_02861	ONDKMJBG_04028	JDGDJJKN_03329	KLMHLHPE_02528	EGICBAEE_03073	LNEFCFII_02898	NILJAHBC_03187	KCIFOFJF_02861	CJCKLIFP_03144	IABBECJM_03187	LANDOHOG_03185	LOGCBOHO_02871	DKGFALGN_02582	PNFFMGCL_02603	BJCGHIIB_02407	NHHDDJBG_02217	LBLHELLM_02185	CGJPMKCI_02922	JOHJONHN_02593	CNEDDIJH_02314	JLJGJGIB_02524
glyS		Glycine--tRNA ligase beta subunit	102	102	1	1	14218				1970	2069	2068	DGJMBLJC_02015	HFDHOMNF_03984	ALEPGING_02036	GEOGNNEI_03666	BINKDPLB_03965	IPPPMGOG_02811	NCHKEDON_02417	PLMPIJHD_03946	LIBHOFBA_04031	MFAGDJPO_03756	AICMNGMC_02372	JAGDPAPJ_03945	JICHJFDH_01090	AHEHGMLM_01512	PABJNMJP_03662	MAPHOHON_02852	ONDKMJBG_04037	JDGDJJKN_03321	KLMHLHPE_02519	EGICBAEE_03082	LNEFCFII_02889	NILJAHBC_03178	KCIFOFJF_02870	CJCKLIFP_03135	IABBECJM_03178	LANDOHOG_03176	LOGCBOHO_02862	DKGFALGN_02591	PNFFMGCL_02594	BJCGHIIB_02398	NHHDDJBG_02208	LBLHELLM_02194	CGJPMKCI_02913	JOHJONHN_02584	CNEDDIJH_02305	JLJGJGIB_02515
mtlD		Mannitol-1-phosphate 5-dehydrogenase	102	102	1	1	14153				821	1148	1144	DGJMBLJC_02051	HFDHOMNF_04018	ALEPGING_02185	GEOGNNEI_03699	BINKDPLB_03998	IPPPMGOG_02778	NCHKEDON_02450	PLMPIJHD_03979	LIBHOFBA_04064	MFAGDJPO_03789	AICMNGMC_02405	JAGDPAPJ_03979	JICHJFDH_01057	AHEHGMLM_01479	PABJNMJP_03629	MAPHOHON_02819	ONDKMJBG_04070	JDGDJJKN_03290	KLMHLHPE_02486	EGICBAEE_03115	LNEFCFII_02856	NILJAHBC_03145	KCIFOFJF_02903	CJCKLIFP_03102	IABBECJM_03145	LANDOHOG_03143	LOGCBOHO_02829	DKGFALGN_02624	PNFFMGCL_02561	BJCGHIIB_02365	NHHDDJBG_02175	LBLHELLM_02227	CGJPMKCI_02880	JOHJONHN_02551	CNEDDIJH_02272	JLJGJGIB_02482
envC		Murein hydrolase activator EnvC	102	102	1	1	14121				407	1283	1268	DGJMBLJC_02072	HFDHOMNF_04040	ALEPGING_02853	GEOGNNEI_03718	BINKDPLB_04017	IPPPMGOG_02759	NCHKEDON_02469	PLMPIJHD_03998	LIBHOFBA_04083	MFAGDJPO_03808	AICMNGMC_02424	JAGDPAPJ_03998	JICHJFDH_01038	AHEHGMLM_01460	PABJNMJP_03610	MAPHOHON_02800	ONDKMJBG_04089	JDGDJJKN_03273	KLMHLHPE_02466	EGICBAEE_03134	LNEFCFII_02837	NILJAHBC_03126	KCIFOFJF_02922	CJCKLIFP_03083	IABBECJM_03126	LANDOHOG_03124	LOGCBOHO_02810	DKGFALGN_02643	PNFFMGCL_02542	BJCGHIIB_02346	NHHDDJBG_02156	LBLHELLM_02246	CGJPMKCI_02861	JOHJONHN_02532	CNEDDIJH_02253	JLJGJGIB_02463
rfaQ		Lipopolysaccharide core heptosyltransferase RfaQ	102	102	1	1	14093				131	1070	1060	DGJMBLJC_02091	HFDHOMNF_04059	ALEPGING_03617	GEOGNNEI_03737	BINKDPLB_04036	IPPPMGOG_02740	NCHKEDON_02488	PLMPIJHD_04017	LIBHOFBA_04102	MFAGDJPO_03827	AICMNGMC_02443	JAGDPAPJ_04017	JICHJFDH_01019	AHEHGMLM_01441	PABJNMJP_03591	MAPHOHON_02781	ONDKMJBG_04108	JDGDJJKN_03255	KLMHLHPE_02447	EGICBAEE_03153	LNEFCFII_02818	NILJAHBC_03107	KCIFOFJF_02941	CJCKLIFP_03064	IABBECJM_03107	LANDOHOG_03105	LOGCBOHO_02791	DKGFALGN_02662	PNFFMGCL_02523	BJCGHIIB_02327	NHHDDJBG_02137	LBLHELLM_02265	CGJPMKCI_02842	JOHJONHN_02513	CNEDDIJH_02234	JLJGJGIB_02444
group_4211		hypothetical protein	102	102	1	1	14087				545	665	663	DGJMBLJC_02097	HFDHOMNF_04065	ALEPGING_03611	GEOGNNEI_03743	BINKDPLB_04042	IPPPMGOG_02734	NCHKEDON_02494	PLMPIJHD_04023	LIBHOFBA_04108	MFAGDJPO_03833	AICMNGMC_02449	JAGDPAPJ_04023	JICHJFDH_01013	AHEHGMLM_01435	PABJNMJP_03585	MAPHOHON_02775	ONDKMJBG_04114	JDGDJJKN_03249	KLMHLHPE_02441	EGICBAEE_03159	LNEFCFII_02812	NILJAHBC_03101	KCIFOFJF_02947	CJCKLIFP_03058	IABBECJM_03101	LANDOHOG_03099	LOGCBOHO_02785	DKGFALGN_02668	PNFFMGCL_02517	BJCGHIIB_02321	NHHDDJBG_02131	LBLHELLM_02271	CGJPMKCI_02836	JOHJONHN_02507	CNEDDIJH_02228	JLJGJGIB_02438
recG		ATP-dependent DNA helicase RecG	102	102	1	1	14056				1376	2081	2074	DGJMBLJC_02113	HFDHOMNF_04080	ALEPGING_03129	GEOGNNEI_03758	BINKDPLB_04057	IPPPMGOG_02719	NCHKEDON_02509	PLMPIJHD_04038	LIBHOFBA_04123	MFAGDJPO_03848	AICMNGMC_02464	JAGDPAPJ_04038	JICHJFDH_00998	AHEHGMLM_01420	PABJNMJP_03570	MAPHOHON_02760	ONDKMJBG_04129	JDGDJJKN_03234	KLMHLHPE_02426	EGICBAEE_03174	LNEFCFII_02797	NILJAHBC_03086	KCIFOFJF_02962	CJCKLIFP_03043	IABBECJM_03086	LANDOHOG_03084	LOGCBOHO_02770	DKGFALGN_02683	PNFFMGCL_02502	BJCGHIIB_02306	NHHDDJBG_02116	LBLHELLM_02286	CGJPMKCI_02821	JOHJONHN_02492	CNEDDIJH_02213	JLJGJGIB_02423
gltS		Sodium/glutamate symporter	102	102	1	1	14054				1055	1205	1203	DGJMBLJC_02115	HFDHOMNF_04081	ALEPGING_03128	GEOGNNEI_03759	BINKDPLB_04058	IPPPMGOG_02718	NCHKEDON_02510	PLMPIJHD_04039	LIBHOFBA_04124	MFAGDJPO_03849	AICMNGMC_02465	JAGDPAPJ_04039	JICHJFDH_00997	AHEHGMLM_01419	PABJNMJP_03569	MAPHOHON_02759	ONDKMJBG_04130	JDGDJJKN_03233	KLMHLHPE_02425	EGICBAEE_03175	LNEFCFII_02796	NILJAHBC_03085	KCIFOFJF_02963	CJCKLIFP_03042	IABBECJM_03085	LANDOHOG_03083	LOGCBOHO_02769	DKGFALGN_02684	PNFFMGCL_02501	BJCGHIIB_02305	NHHDDJBG_02115	LBLHELLM_02287	CGJPMKCI_02820	JOHJONHN_02491	CNEDDIJH_02212	JLJGJGIB_02422
yfeX		putative deferrochelatase/peroxidase YfeX	102	102	1	1	10403				560	899	895	DGJMBLJC_02177	HFDHOMNF_03060	ALEPGING_00116	GEOGNNEI_02715	BINKDPLB_01843	IPPPMGOG_00899	NCHKEDON_00883	PLMPIJHD_02683	LIBHOFBA_02495	MFAGDJPO_01303	AICMNGMC_02803	JAGDPAPJ_02738	JICHJFDH_02359	AHEHGMLM_02828	PABJNMJP_03985	MAPHOHON_02429	ONDKMJBG_03116	JDGDJJKN_03005	KLMHLHPE_02207	EGICBAEE_01334	LNEFCFII_01937	NILJAHBC_02443	KCIFOFJF_02333	CJCKLIFP_01444	IABBECJM_01800	LANDOHOG_01910	LOGCBOHO_02205	DKGFALGN_02401	PNFFMGCL_01837	BJCGHIIB_01877	NHHDDJBG_01683	LBLHELLM_01048	CGJPMKCI_01994	JOHJONHN_02202	CNEDDIJH_01476	JLJGJGIB_01462
zipA		Cell division protein ZipA	102	102	1	1	10370				956	986	985	DGJMBLJC_02197	HFDHOMNF_03078	ALEPGING_02144	GEOGNNEI_02697	BINKDPLB_01825	IPPPMGOG_00917	NCHKEDON_00865	PLMPIJHD_02665	LIBHOFBA_02477	MFAGDJPO_01285	AICMNGMC_02785	JAGDPAPJ_02720	JICHJFDH_02377	AHEHGMLM_02846	PABJNMJP_03967	MAPHOHON_02447	ONDKMJBG_03098	JDGDJJKN_02987	KLMHLHPE_02189	EGICBAEE_01316	LNEFCFII_01919	NILJAHBC_02461	KCIFOFJF_02351	CJCKLIFP_01426	IABBECJM_01818	LANDOHOG_01892	LOGCBOHO_02223	DKGFALGN_02383	PNFFMGCL_01855	BJCGHIIB_01859	NHHDDJBG_01665	LBLHELLM_01066	CGJPMKCI_02012	JOHJONHN_02220	CNEDDIJH_01458	JLJGJGIB_01480
gltX		Glutamate--tRNA ligase	102	102	1	1	10358				1304	1424	1414	DGJMBLJC_02210	HFDHOMNF_04533	ALEPGING_04075	GEOGNNEI_02683	BINKDPLB_01811	IPPPMGOG_00931	NCHKEDON_00851	PLMPIJHD_02651	LIBHOFBA_02463	MFAGDJPO_01271	AICMNGMC_02771	JAGDPAPJ_02706	JICHJFDH_02389	AHEHGMLM_02860	PABJNMJP_03953	MAPHOHON_02461	ONDKMJBG_03084	JDGDJJKN_02973	KLMHLHPE_02175	EGICBAEE_01302	LNEFCFII_01905	NILJAHBC_02475	KCIFOFJF_02365	CJCKLIFP_01412	IABBECJM_01832	LANDOHOG_01878	LOGCBOHO_02237	DKGFALGN_02369	PNFFMGCL_01869	BJCGHIIB_04351	NHHDDJBG_04357	LBLHELLM_01080	CGJPMKCI_04337	JOHJONHN_01814	CNEDDIJH_02341	JLJGJGIB_04144
group_4237		hypothetical protein	102	102	1	1	10357				371	371	371	DGJMBLJC_02211	HFDHOMNF_04534	ALEPGING_04074	GEOGNNEI_02682	BINKDPLB_01810	IPPPMGOG_00932	NCHKEDON_00850	PLMPIJHD_02650	LIBHOFBA_02462	MFAGDJPO_01270	AICMNGMC_02770	JAGDPAPJ_02705	JICHJFDH_02390	AHEHGMLM_02861	PABJNMJP_03952	MAPHOHON_02462	ONDKMJBG_03083	JDGDJJKN_02972	KLMHLHPE_02174	EGICBAEE_01301	LNEFCFII_01904	NILJAHBC_02476	KCIFOFJF_02366	CJCKLIFP_01411	IABBECJM_01833	LANDOHOG_01877	LOGCBOHO_02238	DKGFALGN_02368	PNFFMGCL_01870	BJCGHIIB_04352	NHHDDJBG_04356	LBLHELLM_01081	CGJPMKCI_04336	JOHJONHN_01815	CNEDDIJH_02342	JLJGJGIB_04145
[truncated: 18,204 more rows]
[truncated: 66 more columns]
